# Supplementary material for: Does the construction of an ecological civilization promote firm technology investment? a Quasi-natural experiment
Source: Frontiers journal article supplement (doi:10.3389/fenvs.2022.1002506), 2022-10-13
Supplement: Table_1.XLSX [file Table_1.XLSX]

## Sheet: Sheet1
cd	year	intan	sale	cost	profit	ta	tl	e	cdname	date0	pr	ct	ctt	pi	layer	ind	indname0	roa	lev	size	age	market	growth	sub	subs	area	Area	SA	order	股票简称	CSR	level	CSR1	CSR2	CSR3	CSR4	CSR5	soe	sub1	SUBS1
12	2010	82800000	7744000000	4944000000	1597000000	12470000000	5710000000	6759000000	南玻A	1992-02-28	广东省	深圳市	南山区			C30	非金属矿物制品业	0.128068	0.457945	23.2466	18	1.56645		33700000	0.0043486	1	1	-3.84606	33	南玻A	68.2	B	18.44	14.11	13	17	5.65	1	1216422	matched (3)
12	2011	105000000	8271000000	5665000000	1338000000	15280000000	7975000000	7306000000	南玻A	1992-02-28	广东省	深圳市	南山区			C30	非金属矿物制品业	0.0875258	0.521906	23.4499	19	1.46008	0.0680261	120000000	0.0145246	1	1	-3.86922	218	南玻A	64.21	B	22.79	7.59	15	14	4.83	1	100000	matched (3)
12	2012	125000000	6994000000	5356000000	369800000	14340000000	7068000000	7268000000	南玻A	1992-02-28	广东省	深圳市	南山区			C30	非金属矿物制品业	0.025796	0.493004	23.386	20	1.30594	-0.154324	89400000	0.0127852	1	1	-3.9149	347	南玻A	62.25	B	18.55	8.27	12	20	3.43	1	0	matched (3)
12	2013	119000000	7734000000	5501000000	1621000000	15080000000	6678000000	8401000000	南玻A	1992-02-28	广东省	深圳市	南山区			C30	非金属矿物制品业	0.107516	0.442868	23.4366	21	1.40581	0.105719	115000000	0.0148877	1	1	-3.95044	183	南玻A	71.19	B	27.34	11.39	13	17	2.46	1		master only (1)
12	2014	163000000	7045000000	5323000000	854000000	15280000000	6771000000	8514000000	南玻A	1992-02-28	广东省	深圳市	南山区			C30	非金属矿物制品业	0.0558769	0.442985	23.4501	22	1.32335	-0.0891274	90200000	0.0128077	1	1	-3.9892	61	南玻A	64.29	B	23.39	11.03	15	14	0.87	1		master only (1)
12	2015	163000000	7431000000	5825000000	547700000	15660000000	8012000000	7645000000	南玻A	1992-02-28	广东省	深圳市	南山区			C30	非金属矿物制品业	0.0349828	0.511695	23.4742	23	1.27574	0.0548494	81000000	0.0109023	1	1	-4.02697	36	南玻A	74.26	B	22.13	11.43	15	23	2.7	0		master only (1)
12	2016	228000000	8974000000	6562000000	804200000	17150000000	9018000000	8129000000	南玻A	1992-02-28	广东省	深圳市	南山区			C30	非金属矿物制品业	0.0469024	0.525907	23.5651	24	1.36754	0.207673	91600000	0.0102102	1	1	-4.05811	65	南玻A	72.78	B	18.8	13.17	15	23	2.81	0		master only (1)
12	2017	287000000	10880000000	8216000000	828600000	19540000000	10760000000	8780000000	南玻A	1992-02-28	广东省	深圳市	南山区			C30	非金属矿物制品业	0.042418	0.55057	23.6955	25	1.32411	0.212313	87900000	0.0080772	1	1	-4.08415	3090	南玻A	13.31	D	7.58	2.62	0	0	3.11	0	100000	matched (3)
23	2010	0	919600000	781500000	13052755	938500000	621100000	317400000	深天地A	1993-04-29	广东省	深圳市	南山区			C30	非金属矿物制品业	0.0139078	0.661815	20.6598	17	1.17674		0	0	1	1	-3.70994	1707	深天地A	18.5	D	9.91	3.59	0	0	5	0		master only (1)
23	2011	0	800100000	671000000	9.1002e+06	1094000000	748300000	345200000	深天地A	1993-04-29	广东省	深圳市	南山区			C30	非金属矿物制品业	0.0083215	0.684301	20.8127	18	1.19244	-0.129909	479962	0.0005998	1	1	-3.77162	1714	深天地A	19.61	D	11.44	3.17	0	0	5	0		master only (1)
23	2012	736050	877900000	783200000	5.1311e+06	1219000000	811700000	407400000	深天地A	1993-04-29	广东省	深圳市	南山区			C30	非金属矿物制品业	0.0042091	0.665814	20.9213	19	1.12104	0.0972328	10000	1.14e-05	1	1	-3.8258	1885	深天地A	19.34	D	11.64	2.7	0	0	5	0		master only (1)
23	2013	3450850	1070000000	928900000	11822530	1345000000	929900000	415000000	深天地A	1993-04-29	广东省	深圳市	南山区			C30	非金属矿物制品业	0.0087906	0.691395	21.0196	20	1.15143	0.218224	80000	7.48e-05	1	1	-3.87776	1510	深天地A	22.11	D	13.11	4	0	0	5	0		master only (1)
23	2014	3525850	1092000000	955500000	15066369	1474000000	1049000000	424600000	深天地A	1993-04-29	广东省	深圳市	南山区			C30	非金属矿物制品业	0.0102214	0.711966	21.1112	21	1.14328	0.0213333	132599	0.0001214	1	1	-3.92816	1419	深天地A	21.88	D	12.88	4	0	0	5	0		master only (1)
23	2015	3525850	1038000000	850800000	26633941	1566000000	1119000000	446600000	深天地A	1993-04-29	广东省	深圳市	南山区			C30	非金属矿物制品业	0.0170091	0.714821	21.1717	22	1.21974	-0.0499389	517636	0.0004988	1	1	-3.97463	1366	深天地A	22.88	D	13.88	4	0	0	5	0		master only (1)
23	2016	3525850	1010000000	878900000	15828541	1514000000	1058000000	455600000	深天地A	1993-04-29	广东省	深圳市	南山区			C30	非金属矿物制品业	0.010455	0.699066	21.138	23	1.14913	-0.0268295	1716115	0.0016992	1	1	-4.01106	2289	深天地A	19.64	D	11.15	3.67	0	0	4.82	0		master only (1)
23	2017	3602350	1229000000	1093000000	28688799	1952000000	1473000000	478800000	深天地A	1993-04-29	广东省	深圳市	南山区			C30	非金属矿物制品业	0.0147	0.754666	21.3919	24	1.12484	0.217065	927317	0.0007544	1	1	-4.07553	1900	深天地A	21.5	D	12.5	4	0	0	5	0		master only (1)
27	2010	665000000	12460000000	10510000000	1616000000	29070000000	12650000000	16420000000	深圳能源	1993-09-03	广东省	深圳市	福田区			D44	电力、热力生产和供应业	0.0555879	0.435322	24.093	17	1.18587		570000000	0.0456987	1	1	-3.71256	216	深圳能源	57.7	C	14.97	9	16	11	6.73	1		master only (1)
27	2011	681000000	14390000000	12420000000	1183000000	31510000000	14590000000	16920000000	深圳能源	1993-09-03	广东省	深圳市	福田区			D44	电力、热力生产和供应业	0.0375399	0.462982	24.1735	18	1.15836	0.15422	404000000	0.0280651	1	1	-3.74045	278	深圳能源	61.25	B	15.93	8.5	17	11	8.82	1		master only (1)
27	2012	2000000000	12830000000	10680000000	1136000000	32360000000	14810000000	17550000000	深圳能源	1993-09-03	广东省	深圳市	福田区			D44	电力、热力生产和供应业	0.0351206	0.457686	24.2002	19	1.20141	-0.108329	505000000	0.039396	1	1	-3.77632	125	深圳能源	71.05	B	16.55	9	18	9	18.5	1		master only (1)
27	2013	2010000000	12350000000	9720000000	1737000000	33390000000	14550000000	18840000000	深圳能源	1993-09-03	广东省	深圳市	福田区			D44	电力、热力生产和供应业	0.0520051	0.435835	24.2316	20	1.27068	-0.0372374	584000000	0.047247	1	1	-3.81137	91	深圳能源	74.91	B	21.7	9	15	13	16.21	1		master only (1)
27	2014	2560000000	12510000000	9256000000	2336000000	38440000000	18090000000	20350000000	深圳能源	1993-09-03	广东省	深圳市	福田区			D44	电力、热力生产和供应业	0.0607705	0.470503	24.3724	21	1.35111	0.0125709	557000000	0.044571	1	1	-3.82817	60	深圳能源	64.35	B	21.25	9	18	9	7.1	1		master only (1)
27	2015	2720000000	11130000000	7797000000	2058000000	58070000000	33200000000	24870000000	深圳能源	1993-09-03	广东省	深圳市	福田区			D44	电力、热力生产和供应业	0.0354363	0.571742	24.7849	22	1.42751	-0.110032	278000000	0.0249483	1	1	-3.79036	458	深圳能源	30.71	D	19.87	3	0	0	7.84	1		master only (1)
27	2016	2770000000	11320000000	8044000000	1407000000	60860000000	36030000000	24830000000	深圳能源	1993-09-03	广东省	深圳市	福田区			D44	电力、热力生产和供应业	0.0231118	0.592068	24.8319	23	1.4071	0.0169029	157000000	0.0138801	1	1	-3.82057	43	深圳能源	74.32	B	19.32	10	20	15	10	1	3415093	matched (3)
27	2017	2820000000	15550000000	11270000000	845100000	77230000000	52510000000	24720000000	深圳能源	1993-09-03	广东省	深圳市	福田区			D44	电力、热力生产和供应业	0.010942	0.679887	25.0701	24	1.37889	0.373538	74400000	0.0047833	1	1	-3.80801	694	深圳能源	27.58	D	14.58	3	0	0	10	1		master only (1)
37	2010	235907	1602000000	2239000000	-123400000	5279000000	3346000000	1932000000	深南电A	1994-07-01	广东省	深圳市	南山区			D44	电力、热力生产和供应业	-0.0233822	0.633932	22.387	16	0.715267		651000000	0.406254	1	1	-3.79796	2367	深南电A	-1.26	E	4.99	3	0	0	-9.25	1		master only (1)
37	2011	2975947	2416000000	3590000000	9.03161e+06	5453000000	3565000000	1888000000	深南电A	1994-07-01	广东省	深圳市	南山区			D44	电力、热力生产和供应业	0.0016563	0.653787	22.4194	17	0.672985	0.508255	1290000000	0.534894	1	1	-3.83791	1937	深南电A	18.07	D	5.07	3	0	0	10	1		master only (1)
37	2012	3198437	1265000000	2087000000	-235000000	5536000000	3813000000	1723000000	深南电A	1994-07-01	广东省	深圳市	南山区			D44	电力、热力生产和供应业	-0.0424496	0.688802	22.4346	18	0.60627	-0.476183	852000000	0.673553	1	1	-3.87785	2728	深南电A	3.1	D	0.54	3	0	0	-0.44	1		master only (1)
37	2013	3301027	1110000000	1613000000	73379180	5440000000	3641000000	1800000000	深南电A	1994-07-01	广东省	深圳市	南山区			D44	电力、热力生产和供应业	0.0134881	0.669176	22.4171	19	0.688336	-0.122501	789000000	0.710536	1	1	-3.91792	2438	深南电A	16.89	D	5.76	3	0	0	8.13	1	30000	matched (3)
37	2014	3727410	1234000000	1741000000	-421600000	5056000000	3678000000	1378000000	深南电A	1994-07-01	广东省	深圳市	南山区			D44	电力、热力生产和供应业	-0.0833856	0.727446	22.3439	20	0.708885	0.111375	512000000	0.414583	1	1	-3.95789	3383	深南电A	1.3	D	-1.42	3	0	0	-0.28	1	0	matched (3)
37	2015	3745010	1345000000	1493000000	-829300000	4580000000	4031000000	548900000	深南电A	1994-07-01	广东省	深圳市	南山区			D44	电力、热力生产和供应业	-0.181081	0.880147	22.2449	21	0.900995	0.0898765	358000000	0.266067	1	1	-3.99711	3471	深南电A	-0.09	E	-3.04	3	0	0	-0.05	1		master only (1)
37	2016	3678110	1574000000	1443000000	1265000000	4364000000	2340000000	2024000000	深南电A	1994-07-01	广东省	深圳市	南山区			D44	电力、热力生产和供应业	0.289836	0.536181	22.1966	22	1.09092	0.170311	16300000	0.0103754	1	1	-4.03643	1380	深南电A	24.51	D	16.19	3	0	0	5.32	1		master only (1)
37	2017	3678110	2046000000	1875000000	377077	2884000000	859500000	2024000000	深南电A	1994-07-01	广东省	深圳市	南山区			D44	电力、热力生产和供应业	0.0001308	0.298029	21.7824	23	1.09133	0.299651	7052625	0.0034474	1	1	-4.06233	2125	深南电A	20.36	D	7.36	3	0	0	10	1		master only (1)
40	2010	118000000	777200000	457900000	92386770	2283000000	1400000000	883500000	东旭蓝天	1994-08-08	广东省	深圳市	罗湖区			D44	电力、热力生产和供应业	0.0404599	0.613091	21.5489	16	1.69735		0	0	1	1	-3.76788	598	东旭蓝天	29.04	D	13.49	0.55	0	0	15	1		master only (1)
40	2011	619430	817400000	541300000	140500000	1888000000	902500000	985600000	东旭蓝天	1994-08-08	广东省	深圳市	罗湖区			D44	电力、热力生产和供应业	0.0744004	0.477982	21.3589	17	1.51008	0.0516692	0	0	1	1	-3.79266	756	东旭蓝天	28.63	D	12.14	1.49	0	0	15	0		master only (1)
40	2012	1100730	860900000	381900000	194100000	2868000000	1704000000	1165000000	东旭蓝天	1994-08-08	广东省	深圳市	罗湖区			D44	电力、热力生产和供应业	0.0676693	0.593918	21.777	18	2.25409	0.0532405	0	0	1	1	-3.86205	655	东旭蓝天	35.84	D	17.22	3.62	0	0	15	0		master only (1)
40	2013	1533320	815100000	469600000	102900000	3961000000	2708000000	1252000000	东旭蓝天	1994-08-08	广东省	深圳市	罗湖区			D44	电力、热力生产和供应业	0.0259722	0.683762	22.0997	19	1.73558	-0.0531731	10000	1.23e-05	1	1	-3.91445	714	东旭蓝天	31.25	D	13.93	2.32	0	0	15	0		master only (1)
40	2014	1533320	1037000000	692700000	53173698	4270000000	3001000000	1269000000	东旭蓝天	1994-08-08	广东省	深圳市	罗湖区			D44	电力、热力生产和供应业	0.0124534	0.702902	22.1748	20	1.49647	0.271648	0	0	1	1	-3.95606	569	东旭蓝天	27.28	D	10.84	1.44	0	0	15	0		master only (1)
40	2015	1533320	1666000000	1113000000	62044582	6769000000	5443000000	1326000000	东旭蓝天	1994-08-08	广东省	深圳市	罗湖区			D44	电力、热力生产和供应业	0.0091661	0.804167	22.6356	21	1.49619	0.607018	0	0	1	1	-3.99526	821	东旭蓝天	26.22	D	10.42	0.8	0	0	15	0		master only (1)
40	2016	6140848	3774000000	3147000000	175300000	17290000000	6324000000	10960000000	东旭蓝天	1994-08-08	广东省	深圳市	罗湖区			D44	电力、热力生产和供应业	0.0101423	0.365806	23.5733	22	1.19904	1.26537	5484400	0.0014534	1	1	-3.97727	1282	东旭蓝天	25.11	D	10.55	1.88	0	0	12.68	0		master only (1)
40	2017	14300000	8131000000	6801000000	539900000	28900000000	17340000000	11560000000	东旭蓝天	1994-08-08	广东省	深圳市	罗湖区			D44	电力、热力生产和供应业	0.0186808	0.600067	24.0872	23	1.19555	1.15477	960000000	0.118101	1	1	-3.9534	2718	东旭蓝天	16.89	D	12.47	1.04	0	0	3.38	0		master only (1)
59	2010	435000000	23930000000	19980000000	412700000	26540000000	19920000000	6617000000	华锦股份	1997-01-30	辽宁省	盘锦市	双台子区			C25	石油加工、炼焦及核燃料加工业	0.0155506	0.750634	24.0018	13	1.19731		3803572	0.000159	1	1	-3.5656	209	华锦股份	57.85	C	11.75	11.99	9	19.5	5.61	1	100000	matched (3)
59	2011	436000000	37560000000	32170000000	842000000	28540000000	20990000000	7546000000	华锦股份	1997-01-30	辽宁省	盘锦市	双台子区			C25	石油加工、炼焦及核燃料加工业	0.0295063	0.735552	24.0744	14	1.16728	0.569629	4293215	0.0001143	1	1	-3.59527	395	华锦股份	54.64	C	14.07	9.62	11	14	5.95	1	0	matched (3)
59	2012	610000000	36010000000	31680000000	19933416	32750000000	25360000000	7388000000	华锦股份	1997-01-30	辽宁省	盘锦市	双台子区			C25	石油加工、炼焦及核燃料加工业	0.0006086	0.774421	24.2123	15	1.13679	-0.0412262	24900000	0.0006918	1	1	-3.61443	580	华锦股份	51.33	C	8.55	9.78	11	17	5	1	676937	matched (3)
59	2013	623000000	41560000000	37330000000	-162000000	28440000000	21210000000	7231000000	华锦股份	1997-01-30	辽宁省	盘锦市	双台子区			C25	石油加工、炼焦及核燃料加工业	-0.0056949	0.745773	24.0712	16	1.11325	0.154108	4786507	0.0001152	1	1	-3.67574	3006	华锦股份	3.05	D	6.49	1.1	0	0	-4.54	1	187625	matched (3)
59	2014	624000000	43950000000	40890000000	-1486000000	34600000000	25120000000	9480000000	华锦股份	1997-01-30	辽宁省	盘锦市	双台子区			C25	石油加工、炼焦及核燃料加工业	-0.0429537	0.725987	24.2671	17	1.07466	0.057444	6019495	0.000137	1	1	-3.68569	3370	华锦股份	1.75	D	0.58	0.4	0	0	0.77	1	187625	matched (3)
59	2015	631000000	30910000000	26000000000	362500000	29920000000	20700000000	9217000000	华锦股份	1997-01-30	辽宁省	盘锦市	双台子区			C25	石油加工、炼焦及核燃料加工业	0.0121165	0.691936	24.1218	18	1.18887	-0.296639	4788902	0.0001549	1	1	-3.74829	3232	华锦股份	7.72	D	8.12	0.62	0	0	-1.02	1	187625	matched (3)
59	2016	638000000	29100000000	20900000000	1848000000	31370000000	20290000000	11080000000	华锦股份	1997-01-30	辽宁省	盘锦市	双台子区			C25	石油加工、炼焦及核燃料加工业	0.0589132	0.646671	24.1691	19	1.39247	-0.0584088	6289474	0.0002161	1	1	-3.78113	1467	华锦股份	23.98	D	20.81	0.53	0	0	2.64	1	187625	matched (3)
59	2017	643000000	33710000000	25680000000	1941000000	30970000000	18300000000	12660000000	华锦股份	1997-01-30	辽宁省	盘锦市	双台子区			C25	石油加工、炼焦及核燃料加工业	0.0626823	0.591054	24.1562	20	1.31268	0.158392	14500000	0.0004292	1	1	-3.8231	2428	华锦股份	18.9	D	14.11	0.72	0	0	4.07	1	187625	matched (3)
60	2010	3090000000	9621000000	7626000000	950000000	14570000000	8944000000	5627000000	中金岭南	1997-01-23	广东省	深圳市	福田区			C32	有色金属冶炼和压延加工业	0.0651977	0.6138	23.4023	13	1.26149		19300000	0.0020049	1	1	-3.63348	374	中金岭南	51.54	C	14.54	11	14	17	-5	1	150000	matched (3)
60	2011	3520000000	18630000000	15520000000	1094000000	14040000000	7380000000	6662000000	中金岭南	1997-01-23	广东省	深圳市	福田区			C32	有色金属冶炼和压延加工业	0.0778782	0.525585	23.3653	14	1.20026	0.936871	36000000	0.0019334	1	1	-3.67666	216	中金岭南	64.28	B	17.03	14	11	17	5.25	1		master only (1)
60	2012	4150000000	18400000000	16250000000	534000000	14070000000	6980000000	7093000000	中金岭南	1997-01-23	广东省	深圳市	福田区			C32	有色金属冶炼和压延加工业	0.037944	0.495988	23.3675	15	1.13242	-0.0125837	37800000	0.0020544	1	1	-3.71647	243	中金岭南	66.16	B	13.68	15	13	17	7.48	1	2000000	matched (3)
60	2013	4250000000	21120000000	19650000000	421100000	14450000000	8112000000	6337000000	中金岭南	1997-01-23	广东省	深圳市	福田区			C32	有色金属冶炼和压延加工业	0.0291399	0.561427	23.3939	16	1.07448	0.14773	35900000	0.001698	1	1	-3.75421	336	中金岭南	65.67	B	12.4	14.69	13	20	5.58	1	800000	matched (3)
60	2014	4270000000	24570000000	23080000000	550700000	14220000000	7688000000	6528000000	中金岭南	1997-01-23	广东省	深圳市	福田区			C32	有色金属冶炼和压延加工业	0.0387407	0.540798	23.3776	17	1.06484	0.163673	45700000	0.0018593	1	1	-3.79562	2601	中金岭南	16.54	D	11.2	3.54	0	0	1.8	1		master only (1)
60	2015	5360000000	16940000000	15920000000	260700000	15880000000	7993000000	7890000000	中金岭南	1997-01-23	广东省	深圳市	福田区			C32	有色金属冶炼和压延加工业	0.0164152	0.503239	23.4885	18	1.0639	-0.310741	80900000	0.0047744	1	1	-3.82562	88	中金岭南	68.9	B	9.77	13.79	15	23	7.34	1		master only (1)
60	2016	5710000000	15060000000	13380000000	341900000	16970000000	8753000000	8216000000	中金岭南	1997-01-23	广东省	深圳市	福田区			C32	有色金属冶炼和压延加工业	0.020149	0.515829	23.5547	19	1.12526	-0.110923	69000000	0.0045838	1	1	-3.85916	104	中金岭南	69.94	B	11.07	13.58	15	23	7.29	1		master only (1)
60	2017	5330000000	18970000000	16270000000	1094000000	18870000000	8463000000	10410000000	中金岭南	1997-01-23	广东省	深圳市	福田区			C32	有色金属冶炼和压延加工业	0.0579555	0.448533	23.6608	20	1.16561	0.259476	50500000	0.0026605	1	1	-3.888	542	中金岭南	28.56	D	20.55	3.09	0	0	4.92	1	585887	matched (3)
155	2010	80300000	2006000000	1787000000	-218800000	3378000000	1674000000	1704000000	川能动力	2000-09-26	四川省	成都市	青白江区	1	2	C26	化学原料及化学制品制造业	-0.0647623	0.495575	21.9405	10	1.12249		17800000	0.0088716	3	0	-3.54945	2282	川能动力	6.6	D	2.7	0.57	0	0	3.33	1		master only (1)
155	2011	80600000	1987000000	1769000000	-222800000	3110000000	1627000000	1483000000	川能动力	2000-09-26	四川省	成都市	青白江区	1	2	C26	化学原料及化学制品制造业	-0.0716285	0.523088	21.8579	11	1.12327	-0.0093507	14700000	0.0073866	3	0	-3.586	2552	川能动力	2.87	D	-0.55	0.38	0	0	3.04	1		master only (1)
155	2012	80600000	2120000000	1725000000	1554186	3155000000	1692000000	1463000000	川能动力	2000-09-26	四川省	成都市	青白江区	1	2	C26	化学原料及化学制品制造业	0.0004926	0.536233	21.8722	12	1.22893	0.066835	80100000	0.0377765	3	0	-3.62664	2574	川能动力	10.65	D	5.5	0.39	0	0	4.76	1		master only (1)
155	2013	81600000	1811000000	1702000000	-712100000	2933000000	2177000000	756400000	川能动力	2000-09-26	四川省	成都市	青白江区	1	2	C26	化学原料及化学制品制造业	-0.242736	0.74215	21.7994	13	1.06407	-0.14572	13600000	0.0075222	3	0	-3.6632	3127	川能动力	-4.91	E	-3.6	0.32	0	0	-1.63	1	549567	matched (3)
155	2014	81600000	842100000	839300000	-1647000000	1350000000	2227000000	-877300000	川能动力	2000-09-26	四川省	成都市	青白江区	1	2	C26	化学原料及化学制品制造业	-1.21989	1.64989	21.0233	14	1.00335	-0.534962	13100000	0.015611	3	0	-3.6382	3392	川能动力	0.95	D	-2.23	4	0	0	-0.82	1	549567	matched (3)
155	2015	81600000	319600000	295800000	-710600000	719800000	2348000000	-1628000000	川能动力	2000-09-26	四川省	成都市	青白江区	1	2	C26	化学原料及化学制品制造业	-0.987166	3.2619	20.3945	15	1.08066	-0.620459	17200000	0.0537655	3	0	-3.58754	3405	川能动力	1.4	D	-2.44	4	0	0	-0.16	1	549567	matched (3)
155	2016	0	1812000000	1755000000	865400000	2943000000	88737198	2854000000	川能动力	2000-09-26	四川省	成都市	青白江区	1	2	C26	化学原料及化学制品制造业	0.294072	0.0301552	21.8026	16	1.0327	4.67031	29100000	0.016078	3	0	-3.78336	2352	川能动力	19.34	D	15.32	4	0	0	0.02	1	3344571	matched (3)
155	2017	101812	6509000000	6131000000	381500000	6785000000	3109000000	3676000000	川能动力	2000-09-26	四川省	成都市	青白江区	1	2	C26	化学原料及化学制品制造业	0.0562322	0.458189	22.638	17	1.06174	2.59144	565457	8.69e-05	3	0	-3.83521	3256	川能动力	9.72	D	10.72	4	0	0	-5	1	0	matched (3)
158	2010	0	3701000000	3388000000	54886373	4742000000	2368000000	2374000000	常山北明	2000-07-24	河北省	石家庄市	长安区			C17	纺织业	0.0115739	0.49943	22.2798	10	1.09241		6370795	0.0017215	1	1	-3.55748	1491	常山北明	19.72	D	9.55	0.17	0	0	10	1		master only (1)
158	2011	141955	4705000000	4449000000	57189903	5291000000	2876000000	2415000000	常山北明	2000-07-24	河北省	石家庄市	长安区			C17	纺织业	0.0108087	0.543603	22.3893	11	1.05745	0.271313	16800000	0.0035605	1	1	-3.59796	2439	常山北明	10.21	D	7.29	0.11	0	0	2.81	1		master only (1)
158	2012	141955	5023000000	4766000000	11700296	5717000000	3289000000	2428000000	常山北明	2000-07-24	河北省	石家庄市	长安区			C17	纺织业	0.0020466	0.575353	22.4667	12	1.05373	0.0675108	84500000	0.0168317	1	1	-3.63767	2308	常山北明	16.17	D	6.6	0.19	0	0	9.38	1		master only (1)
158	2013	141955	5857000000	5654000000	17542624	5773000000	3331000000	2442000000	常山北明	2000-07-24	河北省	石家庄市	长安区			C17	纺织业	0.0030386	0.576941	22.4765	13	1.03593	0.166228	245000000	0.0418775	1	1	-3.6776	2763	常山北明	13.22	D	6.36	0.21	0	0	6.65	1		master only (1)
158	2014	141955	6569000000	6490000000	24263831	5553000000	3079000000	2474000000	常山北明	2000-07-24	河北省	石家庄市	长安区			C17	纺织业	0.0043694	0.554528	22.4376	14	1.0121	0.121406	348000000	0.0529846	1	1	-3.71784	3334	常山北明	2.83	D	6.27	0.19	0	0	-3.63	1		master only (1)
158	2015	136000000	8902000000	8293000000	248700000	10940000000	5509000000	5433000000	常山北明	2000-07-24	河北省	石家庄市	长安区			C17	纺织业	0.0227312	0.503495	23.1159	15	1.07343	0.355242	370000000	0.0415717	1	1	-3.73501	2637	常山北明	16.83	D	11.7	0.27	0	0	4.86	1		master only (1)
158	2016	150000000	10970000000	10140000000	347000000	12800000000	7060000000	5744000000	常山北明	2000-07-24	河北省	石家庄市	长安区			C17	纺织业	0.0271001	0.551411	23.273	16	1.08225	0.232802	415000000	0.0378523	1	1	-3.76407	3196	常山北明	12.4	D	13.35	0.25	0	0	-1.2	1		master only (1)
158	2017	164000000	11250000000	10440000000	355000000	12790000000	6777000000	6013000000	常山北明	2000-07-24	河北省	石家庄市	长安区			C17	纺织业	0.0277607	0.52987	23.2719	17	1.07823	0.0255273	615000000	0.0546763	1	1	-3.80416	3102	常山北明	13.08	D	13.64	0.24	0	0	-0.8	1		master only (1)
301	2010	122000000	916600000	605900000	71592733	3743000000	1197000000	2545000000	东方盛虹	2000-05-29	江苏省	苏州市	吴江区			C28	化学纤维制造业	0.0191295	0.319968	22.043	10	1.5127		360000	0.0003928	1	1	-3.55292	346	东方盛虹	52.68	C	11.68	8	16	7	10	1		master only (1)
301	2011	122000000	1073000000	757900000	107800000	3483000000	923400000	2559000000	东方盛虹	2000-05-29	江苏省	苏州市	吴江区			C28	化学纤维制造业	0.030952	0.265155	21.971	11	1.41527	0.17021	428500	0.0003995	1	1	-3.59058	330	东方盛虹	58.24	C	11.24	8.5	10	12	16.5	1		master only (1)
301	2012	122000000	875300000	586500000	159600000	3583000000	888400000	2694000000	东方盛虹	2000-05-29	江苏省	苏州市	吴江区			C28	化学纤维制造业	0.0445443	0.247966	21.9994	12	1.49258	-0.183939	1030000	0.0011767	1	1	-3.63156	187	东方盛虹	68.47	B	18.88	8.5	13	13	15.09	1		master only (1)
301	2013	122000000	1027000000	606900000	330600000	3667000000	702600000	2964000000	东方盛虹	2000-05-29	江苏省	苏州市	吴江区			C28	化学纤维制造业	0.0901656	0.191626	22.0226	13	1.69226	0.17328	1160000	0.0011295	1	1	-3.6723	71	东方盛虹	75.71	B	20.95	10	18	17.5	9.26	1		master only (1)
301	2014	122000000	785500000	416500000	224700000	3987000000	859000000	3128000000	东方盛虹	2000-05-29	江苏省	苏州市	吴江区			C28	化学纤维制造业	0.05637	0.215454	22.1063	14	1.88583	-0.235171	5946100	0.00757	1	1	-3.71461	410	东方盛虹	29.21	D	16.38	3	0	0	9.83	1		master only (1)
301	2015	123000000	693900000	352200000	166900000	4408000000	1164000000	3244000000	东方盛虹	2000-05-29	江苏省	苏州市	吴江区			C28	化学纤维制造业	0.0378594	0.264025	22.2066	15	1.97014	-0.116615	1020000	0.00147	1	1	-3.75659	566	东方盛虹	28.99	D	15.99	3	0	0	10	1		master only (1)
301	2016	123000000	793100000	445800000	147200000	4968000000	1501000000	3467000000	东方盛虹	2000-05-29	江苏省	苏州市	吴江区			C28	化学纤维制造业	0.0296317	0.302185	22.3262	16	1.7792	0.143005	2086085	0.0026303	1	1	-3.79781	84	东方盛虹	71.29	B	16.29	10	20	15	10	1	1079600	matched (3)
301	2017	3229664	1112000000	763600000	228000000	4415000000	825500000	3590000000	东方盛虹	2000-05-29	江苏省	苏州市	吴江区			C28	化学纤维制造业	0.051641	0.186972	22.2083	17	1.45638	0.402105	6023280	0.0054165	1	1	-3.83661	1486	东方盛虹	23.56	D	17.89	3	0	0	2.67	1	462700	matched (3)
401	2010	248000000	11060000000	7558000000	1568000000	30250000000	20960000000	9290000000	冀东水泥	1996-06-14	河北省	唐山市	丰润区			C30	非金属矿物制品业	0.0518473	0.692911	24.1328	14	1.46381		282000000	0.0255272	1	1	-3.58664	349	冀东水泥	52.64	C	16.86	7.88	10	14	3.9	1		master only (1)
401	2011	493000000	15730000000	10900000000	1582000000	38080000000	24920000000	13160000000	冀东水泥	1996-06-14	河北省	唐山市	丰润区			C30	非金属矿物制品业	0.04154	0.654412	24.3628	15	1.44321	0.42155	396000000	0.0251605	1	1	-3.5898	396	冀东水泥	54.63	C	13.82	7.23	13	11	9.58	1		master only (1)
401	2012	684000000	14610000000	11160000000	138000000	41500000000	28140000000	13370000000	冀东水泥	1996-06-14	河北省	唐山市	丰润区			C30	非金属矿物制品业	0.0033245	0.677956	24.4491	16	1.30987	-0.0708809	335000000	0.022927	1	1	-3.61482	376	冀东水泥	61.14	B	10.74	9.4	12	20	9	1		master only (1)
401	2013	879000000	15710000000	11710000000	198700000	43090000000	29190000000	13900000000	冀东水泥	1996-06-14	河北省	唐山市	丰润区			C30	非金属矿物制品业	0.0046114	0.677456	24.4867	17	1.34192	0.0750954	446000000	0.0283965	1	1	-3.64808	459	冀东水泥	60.87	B	12.65	9.22	15	17	7	1		master only (1)
401	2014	857000000	15660000000	12380000000	-277500000	44050000000	30620000000	13440000000	冀东水泥	1996-06-14	河北省	唐山市	丰润区			C30	非金属矿物制品业	-0.0062986	0.694987	24.5087	18	1.26521	-0.0029279	503000000	0.0321209	1	1	-3.68408	3294	冀东水泥	4.43	D	8.63	0.8	0	0	-5	1		master only (1)
401	2015	925000000	11110000000	9406000000	-2150000000	41280000000	29950000000	11330000000	冀东水泥	1996-06-14	河北省	唐山市	丰润区			C30	非金属矿物制品业	-0.0520901	0.725468	24.4437	19	1.18097	-0.290876	244000000	0.0219937	1	1	-3.73577	3555	冀东水泥	-4	E	-0.43	0.84	0	0	-4.41	1	5322401	matched (3)
401	2016	947000000	12340000000	9353000000	-23653371	41480000000	30310000000	11170000000	冀东水泥	1996-06-14	河北省	唐山市	丰润区			C30	非金属矿物制品业	-0.0005702	0.730765	24.4485	20	1.3188	0.11045	312000000	0.0252646	1	1	-3.77492	500	冀东水泥	49.03	C	8.07	9.96	12	14	5	1	10000000	matched (3)
401	2017	978000000	15290000000	10730000000	131100000	41030000000	29760000000	11270000000	冀东水泥	1996-06-14	河北省	唐山市	丰润区			C30	非金属矿物制品业	0.0031957	0.725263	24.4377	21	1.42505	0.239524	266000000	0.0173678	1	1	-3.81683	3058	冀东水泥	13.74	D	7.98	0.76	0	0	5	1	5572622	matched (3)
408	2010	19700000	223100000	213100000	32503271	441000000	276400000	164600000	藏格控股	1996-06-28	青海省	海西蒙古族藏族自治州	格尔木市	1	1	C26	化学原料及化学制品制造业	0.0737076	0.62671	19.9045	14	1.04677		64000	0.0002868	3	0	-3.45333	2090	藏格控股	14.2	D	14.15	0.05	0	0	0	0		master only (1)
408	2011	5007700	218900000	211800000	5.67618e+06	427900000	257000000	170900000	藏格控股	1996-06-28	青海省	海西蒙古族藏族自治州	格尔木市	1	1	C26	化学原料及化学制品制造业	0.0132659	0.600549	19.8743	15	1.03354	-0.0187542	0	0	3	0	-3.48685	2443	藏格控股	9.76	D	7.84	1.83	0	0	0.09	0		master only (1)
408	2012	5007700	33253313	14154931	4.83987e+06	451000000	273900000	177200000	藏格控股	1996-06-28	青海省	海西蒙古族藏族自治州	格尔木市	1	1	C26	化学原料及化学制品制造业	0.0107306	0.607177	19.9271	16	2.34924	-0.848111	0	0	3	0	-3.53812	2735	藏格控股	2.7	D	-1.72	1.52	0	0	2.9	0		master only (1)
408	2013	5007700	192600000	188700000	16411821	576800000	383200000	193600000	藏格控股	1996-06-28	青海省	海西蒙古族藏族自治州	格尔木市	1	1	C26	化学原料及化学制品制造业	0.0284547	0.664357	20.173	17	1.02064	4.79216	0	0	3	0	-3.6275	2930	藏格控股	7.73	D	6.57	1.09	0	0	0.07	0		master only (1)
408	2014	6607700	56645619	57158881	-55422653	456500000	318900000	137600000	藏格控股	1996-06-28	青海省	海西蒙古族藏族自治州	格尔木市	1	1	C26	化学原料及化学制品制造业	-0.12142	0.69855	19.939	18	0.99102	-0.705903	0	0	3	0	-3.62064	3493	藏格控股	-7.18	E	-9.5	2.33	0	0	-0.01	0		master only (1)
408	2015	6607700	119900000	117600000	-60583181	463900000	386900000	77015237	藏格控股	1996-06-28	青海省	海西蒙古族藏族自治州	格尔木市	1	1	C26	化学原料及化学制品制造业	-0.130595	0.833984	19.9552	19	1.01974	1.11674	0	0	3	0	-3.66403	3419	藏格控股	1	D	-1.87	2.87	0	0	0	0		master only (1)
408	2016	510000000	2603000000	737700000	919200000	7361000000	1373000000	5988000000	藏格控股	1996-06-28	青海省	海西蒙古族藏族自治州	格尔木市	1	1	C26	化学原料及化学制品制造业	0.124885	0.186463	22.7194	20	3.52849	20.7081	2758321	0.0010597	3	0	-3.95316	2248	藏格控股	19.84	D	15.89	1.21	0	0	2.74	0		master only (1)
408	2017	564000000	3173000000	855100000	1217000000	7745000000	1210000000	6535000000	藏格控股	1996-06-28	青海省	海西蒙古族藏族自治州	格尔木市	1	1	C26	化学原料及化学制品制造业	0.157134	0.156207	22.7703	21	3.71083	0.219101	14400000	0.0045405	3	0	-3.99159	3161	藏格控股	12.28	D	8.24	1.15	0	0	2.89	0		master only (1)
420	2010	32200000	2334000000	2136000000	-86698818	2916000000	2003000000	913400000	吉林化纤	1996-08-02	吉林省	吉林市	昌邑区	2	2	C28	化学纤维制造业	-0.0297294	0.686778	21.7936	14	1.09293		9281608	0.0039768	2	0	-3.7029	2311	吉林化纤	4.48	D	5.27	1.85	0	0	-2.64	1	2813000	matched (3)
420	2011	32200000	2317000000	2249000000	-309800000	3036000000	2434000000	601500000	吉林化纤	1996-08-02	吉林省	吉林市	昌邑区	2	2	C28	化学纤维制造业	-0.102034	0.801884	21.8338	15	1.03026	-0.0072092	13800000	0.00597	2	0	-3.74488	2577	吉林化纤	1.68	D	-2.97	1.98	0	0	2.67	1	20000	matched (3)
420	2012	32200000	1550000000	1434000000	8.51465e+06	3451000000	2848000000	602400000	吉林化纤	1996-08-02	吉林省	吉林市	昌邑区	2	2	C28	化学纤维制造业	0.0024676	0.825411	21.9618	16	1.08083	-0.331249	188000000	0.121578	2	0	-3.79025	2761	吉林化纤	0.93	D	3.77	2.16	0	0	-5	1	0	matched (3)
420	2013	75700000	1395000000	1403000000	-430600000	3999000000	3827000000	171800000	吉林化纤	1996-08-02	吉林省	吉林市	昌邑区	2	2	C28	化学纤维制造业	-0.107682	0.957023	22.1092	17	0.994352	-0.099772	11800000	0.0084316	2	0	-3.83468	3130	吉林化纤	-5.83	E	-3.78	1.33	0	0	-3.38	1	4017000	matched (3)
420	2014	32400000	1037000000	974400000	-1756305	3309000000	2290000000	1019000000	吉林化纤	1996-08-02	吉林省	吉林市	昌邑区	2	2	C28	化学纤维制造业	-0.0005308	0.692103	21.9198	18	1.06425	-0.256614	14000000	0.0135162	2	0	-3.86864	3381	吉林化纤	1.43	D	5.58	0.85	0	0	-5	1	20000	matched (3)
420	2015	35400000	1036000000	885400000	2.50439e+06	2650000000	1677000000	973300000	吉林化纤	1996-08-02	吉林省	吉林市	昌邑区	2	2	C28	化学纤维制造业	0.000945	0.632748	21.6979	19	1.17029	-0.0007535	9808475	0.0094655	2	0	-3.89764	3138	吉林化纤	11.16	D	5.61	0.55	0	0	5	1		master only (1)
420	2016	36100000	1395000000	1232000000	23144342	4621000000	1928000000	2693000000	吉林化纤	1996-08-02	吉林省	吉林市	昌邑区	2	2	C28	化学纤维制造业	0.0050088	0.417175	22.2538	20	1.13229	0.345763	4315887	0.0030949	2	0	-3.95722	3313	吉林化纤	8.98	D	6.85	0.68	0	0	1.45	1		master only (1)
420	2017	36100000	2198000000	1941000000	85421383	6180000000	3400000000	2780000000	吉林化纤	1996-08-02	吉林省	吉林市	昌邑区	2	2	C28	化学纤维制造业	0.0138219	0.550184	22.5446	21	1.13226	0.576043	3983292	0.0018124	2	0	-3.99687	3258	吉林化纤	9.62	D	7.58	0.91	0	0	1.13	1		master only (1)
422	2010	350000000	11540000000	8918000000	1027000000	18750000000	13590000000	5156000000	*ST宜化	1996-08-15	湖北省	宜昌市	猇亭区	1	2	C26	化学原料及化学制品制造业	0.0548031	0.724969	23.6542	14	1.29456		41600000	0.0036046	2	0	-3.64872	414	*ST宜化	49.48	C	15.8	6.58	7	15	5.1	1	400000	matched (3)
422	2011	376000000	17760000000	14410000000	1266000000	26780000000	19720000000	7059000000	*ST宜化	1996-08-15	湖北省	宜昌市	猇亭区	1	2	C26	化学原料及化学制品制造业	0.0472837	0.736392	24.0109	15	1.23293	0.538755	48300000	0.0027162	2	0	-3.64433	456	*ST宜化	52.12	C	14.98	8.87	9	15	4.27	1	1720000	matched (3)
422	2012	376000000	19350000000	15530000000	1474000000	29650000000	21790000000	7861000000	*ST宜化	1996-08-15	湖北省	宜昌市	猇亭区	1	2	C26	化学原料及化学制品制造业	0.0497141	0.734845	24.1127	16	1.24615	0.0893195	101000000	0.0052065	2	0	-3.66965	447	*ST宜化	58.63	C	16.67	12.02	9	17	3.94	1	1009900	matched (3)
422	2013	507000000	19280000000	16450000000	200400000	35350000000	27890000000	7464000000	*ST宜化	1996-08-15	湖北省	宜昌市	猇亭区	1	2	C26	化学原料及化学制品制造业	0.0056696	0.788887	24.2887	17	1.17235	-0.0037011	110000000	0.0056912	2	0	-3.68217	2593	*ST宜化	15.34	D	9.98	0.36	0	0	5	1	363800	matched (3)
422	2014	507000000	18180000000	14970000000	78996016	37370000000	29860000000	7518000000	*ST宜化	1996-08-15	湖北省	宜昌市	猇亭区	1	2	C26	化学原料及化学制品制造业	0.0021136	0.79884	24.3443	18	1.21429	-0.0569537	98200000	0.0054014	2	0	-3.71294	2970	*ST宜化	13.36	D	8.05	0.52	0	0	4.79	1	160000	matched (3)
422	2015	510000000	18340000000	15520000000	54308267	39980000000	31910000000	8068000000	*ST宜化	1996-08-15	湖北省	宜昌市	猇亭区	1	2	C26	化学原料及化学制品制造业	0.0013584	0.798186	24.4116	19	1.1812	0.0085495	98700000	0.00538	2	0	-3.7414	2976	*ST宜化	13.78	D	8.14	0.64	0	0	5	1	290000	matched (3)
422	2016	535000000	15180000000	13380000000	-1408000000	39770000000	32970000000	6806000000	*ST宜化	1996-08-15	湖北省	宜昌市	猇亭区	1	2	C26	化学原料及化学制品制造业	-0.0353929	0.828879	24.4064	20	1.13508	-0.172077	122000000	0.0080622	2	0	-3.7823	550	*ST宜化	37.29	D	1.99	7.27	9	20	-0.97	1	93333.3	matched (3)
422	2017	535000000	11960000000	11660000000	-5147000000	32550000000	30980000000	1568000000	*ST宜化	1996-08-15	湖北省	宜昌市	猇亭区	1	2	C26	化学原料及化学制品制造业	-0.158127	0.951838	24.2061	21	1.02574	-0.212522	157000000	0.0131109	2	0	-3.8554	3530	*ST宜化	-2.1	E	-3.84	1.85	0	0	-0.11	1	800000	matched (3)
426	2010	18800000	397800000	385900000	-51386140	1626000000	491000000	1135000000	兴业矿业	1996-08-28	内蒙古自治区	赤峰市	松山区			B09	有色金属矿采选业	-0.0316061	0.302007	21.2093	14	1.03097		24200000	0.0607643	3	0	-3.65849	2286	兴业矿业	6.27	D	4.9	2.42	0	0	-1.05	1		master only (1)
426	2011	1460000000	382000000	366300000	185800000	3141000000	1529000000	1612000000	兴业矿业	1996-08-28	内蒙古自治区	赤峰市	松山区			B09	有色金属矿采选业	0.0591654	0.486809	21.8678	15	1.04284	-0.0398384	21500000	0.0562812	3	0	-3.74644	2243	兴业矿业	14.8	D	11.31	3	0	0	0.49	0		master only (1)
426	2012	1460000000	884500000	457600000	105900000	3326000000	1621000000	1705000000	兴业矿业	1996-08-28	内蒙古自治区	赤峰市	松山区			B09	有色金属矿采选业	0.0318293	0.487297	21.9249	16	1.93283	1.31571	1875000	0.0021198	3	0	-3.78885	1934	兴业矿业	19.05	D	6.05	3	0	0	10	0		master only (1)
426	2013	1510000000	826900000	469900000	49966892	4258000000	1527000000	2731000000	兴业矿业	1996-08-28	内蒙古自治区	赤峰市	松山区			B09	有色金属矿采选业	0.0117352	0.358713	22.172	17	1.7597	-0.0651197	300000	0.0003628	3	0	-3.836	1235	兴业矿业	24.22	D	11.22	3	0	0	10	0		master only (1)
426	2014	1780000000	1159000000	899500000	157900000	3933000000	1178000000	2755000000	兴业矿业	1996-08-28	内蒙古自治区	赤峰市	松山区			B09	有色金属矿采选业	0.0401584	0.299452	22.0926	18	1.28891	0.402081	318200	0.0002745	3	0	-3.87428	2621	兴业矿业	16.45	D	12.11	3	0	0	1.34	0		master only (1)
426	2015	1890000000	829700000	566000000	-28905842	4074000000	1374000000	2700000000	兴业矿业	1996-08-28	内蒙古自治区	赤峰市	松山区			B09	有色金属矿采选业	-0.0070948	0.337222	22.1279	19	1.46592	-0.284352	500000	0.0006026	3	0	-3.91511	3176	兴业矿业	10.11	D	5.39	3	0	0	1.72	0		master only (1)
426	2016	3990000000	865700000	478800000	89202309	9763000000	4896000000	4867000000	兴业矿业	1996-08-28	内蒙古自治区	赤峰市	松山区			B09	有色金属矿采选业	0.009137	0.501488	23.0018	20	1.808	0.0433839	493200	0.0005697	3	0	-3.94161	1319	兴业矿业	24.89	D	11.89	3	0	0	10	0		master only (1)
426	2017	4100000000	2111000000	769900000	553600000	9331000000	3956000000	5375000000	兴业矿业	1996-08-28	内蒙古自治区	赤峰市	松山区			B09	有色金属矿采选业	0.0593223	0.423948	22.9566	21	2.74266	1.43897	387900	0.0001837	3	0	-3.98392	683	兴业矿业	27.63	D	14.73	3	0	0	9.9	0		master only (1)
488	2010	15300000	17200000000	13680000000	1302000000	35080000000	19820000000	15260000000	晨鸣纸业	2000-11-20	山东省	潍坊市	寿光市			C22	造纸及纸制品业	0.0371085	0.564953	24.2808	10	1.25726		128000000	0.0074481	1	1	-3.40346	329	晨鸣纸业	53.37	C	14.43	9.87	12	14	3.07	1		master only (1)
488	2011	17700000	17750000000	14930000000	588700000	45630000000	30640000000	14990000000	晨鸣纸业	2000-11-20	山东省	潍坊市	寿光市			C22	造纸及纸制品业	0.012902	0.671543	24.5438	11	1.18862	0.0316435	250000000	0.0140698	1	1	-3.3976	1816	晨鸣纸业	18.96	D	14.63	1.47	0	0	2.86	1		master only (1)
488	2012	17200000	19760000000	16690000000	46686257	47730000000	33380000000	14350000000	晨鸣纸业	2000-11-20	山东省	潍坊市	寿光市			C22	造纸及纸制品业	0.0009782	0.699418	24.5887	12	1.18378	0.113491	259000000	0.0130916	1	1	-3.42919	1941	晨鸣纸业	19.02	D	11.85	2.17	0	0	5	1		master only (1)
488	2013	18300000	20390000000	16650000000	690400000	47520000000	32880000000	14640000000	晨鸣纸业	2000-11-20	山东省	潍坊市	寿光市			C22	造纸及纸制品业	0.0145271	0.691966	24.5845	13	1.22442	0.0317387	191000000	0.0093537	1	1	-3.46999	1385	晨鸣纸业	23.06	D	17.71	1.74	0	0	3.61	1		master only (1)
488	2014	21600000	19100000000	15320000000	453300000	56820000000	42470000000	14350000000	晨鸣纸业	2000-11-20	山东省	潍坊市	寿光市			C22	造纸及纸制品业	0.0079777	0.747491	24.7632	14	1.24659	-0.0631331	270000000	0.0141111	1	1	-3.47482	1777	晨鸣纸业	20.15	D	14.74	1.99	0	0	3.42	1		master only (1)
488	2015	22600000	20190000000	14760000000	977900000	77960000000	60700000000	17260000000	晨鸣纸业	2000-11-20	山东省	潍坊市	寿光市			C22	造纸及纸制品业	0.0125437	0.778623	25.0795	15	1.36763	0.0571136	251000000	0.0124387	1	1	-3.44583	831	晨鸣纸业	26.14	D	18.54	2.6	0	0	5	1		master only (1)
488	2016	23300000	22570000000	15790000000	2023000000	82290000000	59720000000	22560000000	晨鸣纸业	2000-11-20	山东省	潍坊市	寿光市			C22	造纸及纸制品业	0.0245804	0.725773	25.1335	16	1.42943	0.117581	482000000	0.0213749	1	1	-3.4732	1119	晨鸣纸业	26.33	D	20.9	1.59	0	0	3.84	1		master only (1)
488	2017	24300000	29470000000	19730000000	3759000000	105600000000	75350000000	30270000000	晨鸣纸业	2000-11-20	山东省	潍坊市	寿光市			C22	造纸及纸制品业	0.0355878	0.713381	25.3832	17	1.49385	0.306002	401000000	0.0136141	1	1	-3.45151	837	晨鸣纸业	26.74	D	21.98	1.59	0	0	3.17	1		master only (1)
506	2010	0	1197000000	611400000	283000000	5499000000	4522000000	977000000	中润资源	1993-03-12	山东省	济南市	历下区	2	2	B09	有色金属矿采选业	0.0514666	0.822343	22.4279	17	1.9573		0	0	1	1	-3.83788	551	中润资源	31.62	D	15.59	2.33	0	0	13.7	0		master only (1)
506	2011	198000000	1327000000	694700000	222800000	5996000000	4717000000	1278000000	中润资源	1993-03-12	山东省	济南市	历下区	2	2	B09	有色金属矿采选业	0.0371588	0.786778	22.5143	18	1.91028	0.109026	0	0	1	1	-3.87724	686	中润资源	29.92	D	13.15	1.77	0	0	15	0		master only (1)
506	2012	231000000	1071000000	716600000	308200000	5148000000	3562000000	1586000000	中润资源	1993-03-12	山东省	济南市	历下区	2	2	B09	有色金属矿采选业	0.0598738	0.692001	22.3618	19	1.49402	-0.193252	430000	0.0004016	1	1	-3.91794	956	中润资源	27.09	D	18.24	2.66	0	0	6.19	0		master only (1)
506	2013	395000000	907200000	812600000	175300000	3384000000	1525000000	1859000000	中润资源	1993-03-12	山东省	济南市	历下区	2	2	B09	有色金属矿采选业	0.0518	0.450567	21.9424	20	1.11634	-0.152642	0	0	1	1	-3.94953	1268	中润资源	23.95	D	15.89	4	0	0	4.06	0		master only (1)
506	2014	395000000	357200000	377800000	-280100000	3169000000	1632000000	1537000000	中润资源	1993-03-12	山东省	济南市	历下区	2	2	B09	有色金属矿采选业	-0.0883629	0.515011	21.8768	21	0.945291	-0.606308	87300	0.0002444	1	1	-3.98684	3376	中润资源	1.51	D	-0.52	1.52	0	0	0.51	0		master only (1)
506	2015	407000000	1388000000	1039000000	5.8079e+06	3240000000	1699000000	1541000000	中润资源	1993-03-12	山东省	济南市	历下区	2	2	B09	有色金属矿采选业	0.0017924	0.524292	21.8989	22	1.33574	2.88578	0	0	1	1	-4.02779	1166	中润资源	24.04	D	7.61	1.43	0	0	15	0		master only (1)
506	2016	448000000	812100000	507300000	9.88505e+06	3229000000	1652000000	1577000000	中润资源	1993-03-12	山东省	济南市	历下区	2	2	B09	有色金属矿采选业	0.0030614	0.511496	21.8954	23	1.60076	-0.414818	0	0	1	1	-4.06764	1487	中润资源	23.87	D	7.56	1.31	0	0	15	0		master only (1)
506	2017	442000000	769100000	688100000	-475400000	2547000000	1469000000	1078000000	中润资源	1993-03-12	山东省	济南市	历下区	2	2	B09	有色金属矿采选业	-0.18663	0.57663	21.6583	24	1.11763	-0.0530095	0	0	1	1	-4.09524	3445	中润资源	0.65	D	-2.07	1.13	0	0	1.59	0		master only (1)
509	2010	7427974	407300000	360300000	7.95578e+06	649700000	656400000	-6779439	华塑控股	1993-05-07	四川省	南充市	顺庆区			C29	橡胶和塑料制品业	0.0122462	1.01043	20.2919	17	1.13071		1220000	0.002995	3	0	-3.64953	2303	华塑控股	5.04	D	4.18	1.15	0	0	-0.29	1		master only (1)
509	2011	5194856	367500000	344100000	-120100000	509500000	628200000	-118700000	华塑控股	1993-05-07	四川省	南充市	顺庆区			C29	橡胶和塑料制品业	-0.235758	1.23303	20.0489	18	1.06789	-0.0978582	50887.1	0.0001385	3	0	-3.64323	2607	华塑控股	-0.03	E	-1.33	1.26	0	0	0.04	1		master only (1)
509	2012	0	304100000	303500000	-92988222	451100000	662800000	-211700000	华塑控股	1993-05-07	四川省	南充市	顺庆区			C29	橡胶和塑料制品业	-0.206134	1.46934	19.9272	19	1.00176	-0.172584	744968	0.0024501	3	0	-3.65815	2777	华塑控股	0.35	D	-1.39	2.35	0	0	-0.61	1		master only (1)
509	2013	4806056	272000000	261000000	15871136	733200000	658600000	74614372	华塑控股	1993-05-07	四川省	南充市	顺庆区			C29	橡胶和塑料制品业	0.0216472	0.898231	20.4129	20	1.04251	-0.105284	150000	0.0005514	3	0	-3.79068	2836	华塑控股	11.69	D	8.57	1.4	0	0	1.72	0		master only (1)
509	2014	4806056	226600000	202000000	-54955056	626600000	614300000	12325180	华塑控股	1993-05-07	四川省	南充市	顺庆区			C29	橡胶和塑料制品业	-0.0877064	0.980329	20.2558	21	1.12145	-0.167142	456702	0.0020157	3	0	-3.80297	3298	华塑控股	4.3	D	0.57	4	0	0	-0.27	0		master only (1)
509	2015	686931	176800000	145900000	19848603	567800000	534600000	33197137	华塑控股	1993-05-07	四川省	南充市	顺庆区			C29	橡胶和塑料制品业	0.0349554	0.941536	20.1573	22	1.21241	-0.219526	70500000	0.398492	3	0	-3.82452	3128	华塑控股	11.54	D	7.75	4	0	0	-0.21	0		master only (1)
509	2016	0	78835009	73382318	-74809936	341500000	319000000	22530946	华塑控股	1993-05-07	四川省	南充市	顺庆区			C29	橡胶和塑料制品业	-0.219049	0.934028	19.6489	23	1.07431	-0.554193	478900	0.0060747	3	0	-3.75599	3430	华塑控股	3.4	D	-1.43	4	0	0	0.83	0		master only (1)
509	2017	0	2241000000	2220000000	12374264	304700000	270600000	34096370	华塑控股	1993-05-07	四川省	南充市	顺庆区			C29	橡胶和塑料制品业	0.0406058	0.888114	19.535	24	1.00961	27.4251	0	0	3	0	-3.76862	3136	华塑控股	12.68	D	9.08	4	0	0	-0.4	0		master only (1)
510	2010	1480000	2703000000	2438000000	83148176	2419000000	1242000000	1177000000	金路集团	1993-05-07	四川省	德阳市	旌阳区			C26	化学原料及化学制品制造业	0.0343682	0.513404	21.6068	17	1.10837		13800000	0.0051165	3	0	-3.8119	2179	金路集团	11.75	D	10.86	0.71	0	0	0.18	0	1350000	matched (3)
510	2011	1515000	2587000000	2505000000	-115900000	2354000000	1236000000	1118000000	金路集团	1993-05-07	四川省	德阳市	旌阳区			C26	化学原料及化学制品制造业	-0.0492227	0.524906	21.5794	18	1.03259	-0.0427046	15300000	0.0059193	3	0	-3.85003	2539	金路集团	3.67	D	3.08	1.13	0	0	-0.54	0	0	matched (3)
510	2012	1515000	2173000000	2133000000	4.32289e+06	2301000000	1171000000	1130000000	金路集团	1993-05-07	四川省	德阳市	旌阳区			C26	化学原料及化学制品制造业	0.0018785	0.509003	21.5567	19	1.01855	-0.160209	9767705	0.0044957	3	0	-3.88844	2611	金路集团	9.37	D	6.34	1.64	0	0	1.39	0	18750	matched (3)
510	2013	1554565	2006000000	2002000000	-191200000	1842000000	900300000	941900000	金路集团	1993-05-07	四川省	德阳市	旌阳区			C26	化学原料及化学制品制造业	-0.103768	0.48871	21.3342	20	1.00155	-0.0769226	17100000	0.008511	3	0	-3.91045	3049	金路集团	0.98	D	-0.57	1.66	0	0	-0.11	1	0	matched (3)
510	2014	1576379	2052000000	1979000000	-146300000	1804000000	1009000000	795200000	金路集团	1993-05-07	四川省	德阳市	旌阳区			C26	化学原料及化学制品制造业	-0.081085	0.559173	21.3132	21	1.03683	0.0232599	15800000	0.0077222	3	0	-3.94853	3356	金路集团	2.05	D	0.41	1.64	0	0	0	1	150000	matched (3)
510	2015	1576379	1620000000	1530000000	6.53726e+06	1543000000	746700000	795900000	金路集团	1993-05-07	四川省	德阳市	旌阳区			C26	化学原料及化学制品制造业	0.004238	0.484045	21.1567	22	1.05855	-0.210555	8749985	0.0054009	3	0	-3.97305	3032	金路集团	13.07	D	6.3	1.77	0	0	5	0	0	matched (3)
510	2016	1576379	1534000000	1273000000	54320912	1322000000	474300000	847400000	金路集团	1993-05-07	四川省	德阳市	旌阳区			C26	化学原料及化学制品制造业	0.0410991	0.35885	21.0022	23	1.20554	-0.0530434	7347583	0.0047893	3	0	-3.9957	3262	金路集团	10.95	D	8.88	2.08	0	0	-0.01	0		master only (1)
510	2017	1576379	1728000000	1432000000	42288040	1501000000	624500000	876300000	金路集团	1993-05-07	四川省	德阳市	旌阳区			C26	化学原料及化学制品制造业	0.0281775	0.416092	21.1292	24	1.2066	0.12645	6221569	0.0036001	3	0	-4.05012	3225	金路集团	10.61	D	8.37	2.13	0	0	0.11	0		master only (1)
523	2010	6037960	1288000000	1109000000	14353454	932100000	455900000	476200000	广州浪奇	1993-11-08	广东省	广州市	天河区			C26	化学原料及化学制品制造业	0.0153992	0.489093	20.6529	17	1.162		2611492	0.0020269	1	1	-3.70892	1956	广州浪奇	15.94	D	9.55	1.59	0	0	4.8	1		master only (1)
523	2011	6060779	2046000000	1847000000	18262736	1518000000	524800000	993200000	广州浪奇	1993-11-08	广东省	广州市	天河区			C26	化学原料及化学制品制造业	0.0120303	0.345721	21.1407	18	1.10783	0.587855	4021603	0.0019657	1	1	-3.81135	1761	广州浪奇	19.28	D	7.53	1.75	0	0	10	1		master only (1)
523	2012	6060779	3223000000	3030000000	20222845	1841000000	826400000	1014000000	广州浪奇	1993-11-08	广东省	广州市	天河区			C26	化学原料及化学制品制造业	0.0109874	0.449016	21.3333	19	1.0636	0.575137	4940690	0.0015332	1	1	-3.87038	1701	广州浪奇	20.78	D	10.51	1.27	0	0	9	1	144000	matched (3)
523	2013	6182668	4087000000	3830000000	32803543	2496000000	1452000000	1043000000	广州浪奇	1993-11-08	广东省	广州市	天河区			C26	化学原料及化学制品制造业	0.0131431	0.58191	21.6379	20	1.06717	0.268269	7298982	0.0017859	1	1	-3.93394	2660	广州浪奇	14.57	D	10.18	1.29	0	0	3.1	1	0	matched (3)
523	2014	6182668	5409000000	5122000000	39965780	3011000000	1935000000	1076000000	广州浪奇	1993-11-08	广东省	广州市	天河区			C26	化学原料及化学制品制造业	0.0132714	0.642641	21.8257	21	1.0559	0.323422	3142458	0.000581	1	1	-3.98449	2378	广州浪奇	17.64	D	10.1	1.53	0	0	6.01	1		master only (1)
523	2015	8049482	7570000000	7288000000	29670159	3530000000	2428000000	1101000000	广州浪奇	1993-11-08	广东省	广州市	天河区			C26	化学原料及化学制品制造业	0.0084053	0.68796	21.9845	22	1.03869	0.399643	6343403	0.0008379	1	1	-4.03105	2470	广州浪奇	17.71	D	9.78	1.81	0	0	6.12	1		master only (1)
523	2016	10200000	9849000000	9546000000	38992068	4170000000	2385000000	1785000000	广州浪奇	1993-11-08	广东省	广州市	天河区			C26	化学原料及化学制品制造业	0.00935	0.571952	22.1513	23	1.03172	0.300994	11700000	0.0011863	1	1	-4.0756	1991	广州浪奇	21.12	D	9.75	1.51	0	0	9.86	1		master only (1)
523	2017	12400000	11810000000	11480000000	33799644	4813000000	2973000000	1840000000	广州浪奇	1993-11-08	广东省	广州市	天河区			C26	化学原料及化学制品制造业	0.0070231	0.617673	22.2945	24	1.02906	0.199196	25900000	0.0021958	1	1	-4.11761	1901	广州浪奇	21.49	D	9.47	2.02	0	0	10	1		master only (1)
525	2010	11800000	3809000000	3584000000	-9.55635e+06	3695000000	2965000000	729500000	红太阳	1993-10-28	江苏省	南京市	高淳区	2	2	C26	化学原料及化学制品制造业	-0.0025864	0.802555	22.0302	17	1.06261		36600000	0.0096129	1	1	-3.83254	2134	红太阳	13.29	D	8.04	0.25	0	0	5	1	200000	matched (3)
525	2011	13100000	5789000000	5420000000	73447822	7653000000	4746000000	2907000000	红太阳	1993-10-28	江苏省	南京市	高淳区	2	2	C26	化学原料及化学制品制造业	0.0095967	0.620172	22.7584	18	1.06813	0.519975	64400000	0.0111169	1	1	-3.87197	2217	红太阳	15.14	D	10.12	0.45	0	0	4.57	0		master only (1)
525	2012	13200000	7175000000	6416000000	298400000	9116000000	5930000000	3186000000	红太阳	1993-10-28	江苏省	南京市	高淳区	2	2	C26	化学原料及化学制品制造业	0.0327391	0.650526	22.9333	19	1.11842	0.239407	65400000	0.0091081	1	1	-3.90505	2207	红太阳	17.18	D	13.41	0.36	0	0	3.41	0	2100000	matched (3)
525	2013	13900000	7241000000	6230000000	371700000	10310000000	6753000000	3554000000	红太阳	1993-10-28	江苏省	南京市	高淳区	2	2	C26	化学原料及化学制品制造业	0.036066	0.655206	23.0561	20	1.1624	0.0091924	50400000	0.0069635	1	1	-3.93861	2108	红太阳	18.77	D	14.84	0.43	0	0	3.5	0	3944000	matched (3)
525	2014	13900000	6812000000	5659000000	405400000	10690000000	6755000000	3939000000	红太阳	1993-10-28	江苏省	南京市	高淳区	2	2	C26	化学原料及化学制品制造业	0.0379103	0.631668	23.093	21	1.20373	-0.0592192	61500000	0.0090253	1	1	-3.97642	1631	红太阳	20.88	D	17.41	0.22	0	0	3.25	0	226000	matched (3)
525	2015	15000000	4557000000	3971000000	132100000	8226000000	4269000000	3957000000	红太阳	1993-10-28	江苏省	南京市	高淳区	2	2	C26	化学原料及化学制品制造业	0.0160614	0.519008	22.8306	22	1.14756	-0.331146	60900000	0.013369	1	1	-4.02943	1311	红太阳	23.24	D	18.08	0.16	0	0	5	0	3026350	matched (3)
525	2016	35100000	3538000000	2887000000	127000000	10510000000	5689000000	4821000000	红太阳	1993-10-28	江苏省	南京市	高淳区	2	2	C26	化学原料及化学制品制造业	0.0120837	0.541315	23.0755	23	1.22537	-0.223645	81700000	0.0230923	1	1	-4.05747	1990	红太阳	21.12	D	15.97	0.18	0	0	4.97	0	1272700	matched (3)
525	2017	40300000	5072000000	3463000000	722700000	12430000000	7986000000	4443000000	红太阳	1993-10-28	江苏省	南京市	高淳区	2	2	C26	化学原料及化学制品制造业	0.0581425	0.642512	23.2433	24	1.46465	0.433729	116000000	0.0228122	1	1	-4.0863	791	红太阳	27.02	D	23.13	0.82	0	0	3.07	0	2247500	matched (3)
531	2010	2434716	3015000000	2394000000	271400000	6342000000	3920000000	2422000000	穗恒运A	1994-01-06	广东省	广州市	黄埔区			D44	电力、热力生产和供应业	0.0427964	0.618082	22.5704	16	1.25951		1895825	0.0006288	1	1	-3.79649	654	穗恒运A	26.83	D	13.9	3	0	0	9.93	1		master only (1)
531	2011	2434716	3335000000	2807000000	105400000	6494000000	4273000000	2221000000	穗恒运A	1994-01-06	广东省	广州市	黄埔区			D44	电力、热力生产和供应业	0.0162385	0.657995	22.5941	17	1.18815	0.105995	2425709	0.0007274	1	1	-3.83608	1743	穗恒运A	19.38	D	8.62	0.76	0	0	10	1		master only (1)
531	2012	2434716	3144000000	2414000000	294600000	7896000000	5429000000	2468000000	穗恒运A	1994-01-06	广东省	广州市	黄埔区			D44	电力、热力生产和供应业	0.037314	0.6875	22.7897	18	1.30235	-0.0571921	4712962	0.0014991	1	1	-3.87093	765	穗恒运A	30.29	D	19.05	2.09	0	0	9.15	1	1055500	matched (3)
531	2013	2768016	3281000000	2296000000	372800000	8388000000	5676000000	2712000000	穗恒运A	1994-01-06	广东省	广州市	黄埔区			D44	电力、热力生产和供应业	0.0444394	0.67673	22.8501	19	1.42908	0.0434755	3648375	0.0011121	1	1	-3.90867	674	穗恒运A	33.68	D	22.02	1.66	0	0	10	1		master only (1)
531	2014	18300000	4394000000	2961000000	793100000	7493000000	4015000000	3478000000	穗恒运A	1994-01-06	广东省	广州市	黄埔区			D44	电力、热力生产和供应业	0.105837	0.535875	22.7373	20	1.48392	0.339516	3148072	0.0007164	1	1	-3.95263	478	穗恒运A	28.29	D	22.89	1.14	0	0	4.26	1		master only (1)
531	2015	20100000	2226000000	1516000000	490300000	8372000000	4424000000	3948000000	穗恒运A	1994-01-06	广东省	广州市	黄埔区			D44	电力、热力生产和供应业	0.0585657	0.52846	22.8482	21	1.46834	-0.493467	8179326	0.0036745	1	1	-3.98874	751	穗恒运A	26.93	D	20.57	0.3	0	0	6.06	1		master only (1)
531	2016	21600000	2635000000	1775000000	587400000	9186000000	4903000000	4284000000	穗恒运A	1994-01-06	广东省	广州市	黄埔区			D44	电力、热力生产和供应业	0.0639391	0.533676	22.941	22	1.48494	0.183941	3528077	0.0013387	1	1	-4.02468	817	穗恒运A	29.24	D	21.85	0.92	0	0	6.47	1		master only (1)
531	2017	50200000	2965000000	2392000000	202400000	9199000000	4984000000	4215000000	穗恒运A	1994-01-06	广东省	广州市	黄埔区			D44	电力、热力生产和供应业	0.0220027	0.541766	22.9423	23	1.23986	0.125222	7199739	0.0024279	1	1	-4.06462	1859	穗恒运A	21.72	D	14.57	0.24	0	0	6.91	1	92693.3	matched (3)
539	2010	515000000	12640000000	10880000000	788400000	34600000000	21510000000	13080000000	粤电力A	1993-11-26	广东省	广州市	天河区			D44	电力、热力生产和供应业	0.0227883	0.621799	24.267	17	1.16224		11800000	0.0009351	1	1	-3.6857	181	粤电力A	58.85	C	12.85	8.5	10	10	17.5	1		master only (1)
539	2011	521000000	14620000000	13220000000	259100000	39480000000	26230000000	13250000000	粤电力A	1993-11-26	广东省	广州市	天河区			D44	电力、热力生产和供应业	0.0065632	0.664351	24.3991	18	1.10622	0.156455	15200000	0.0010366	1	1	-3.70358	197	粤电力A	65.28	B	10.28	9	15	15	16	1		master only (1)
539	2012	614000000	29490000000	23340000000	2694000000	65710000000	43730000000	21970000000	粤电力A	1993-11-26	广东省	广州市	天河区			D44	电力、热力生产和供应业	0.0409931	0.665573	24.9085	19	1.26371	1.01703	35500000	0.0012044	1	1	-3.64419	510	粤电力A	56.26	C	13.48	10	15	9	8.78	1		master only (1)
539	2013	627000000	30830000000	22680000000	4343000000	67920000000	42330000000	25590000000	粤电力A	1993-11-26	广东省	广州市	天河区			D44	电力、热力生产和供应业	0.0639479	0.623187	24.9416	20	1.35912	0.0454906	51500000	0.001672	1	1	-3.67697	211	粤电力A	70.23	B	25.34	9	15	13	7.89	1		master only (1)
539	2014	642000000	29050000000	20940000000	4329000000	69080000000	41300000000	27780000000	粤电力A	1993-11-26	广东省	广州市	天河区			D44	电力、热力生产和供应业	0.0626585	0.597825	24.9586	21	1.38713	-0.0578704	31000000	0.0010686	1	1	-3.71321	273	粤电力A	31.87	D	21.94	1.97	0	0	7.96	1		master only (1)
539	2015	692000000	25720000000	18050000000	4630000000	71920000000	41700000000	30220000000	粤电力A	1993-11-26	广东省	广州市	天河区			D44	电力、热力生产和供应业	0.0643791	0.57978	24.9988	22	1.42484	-0.114394	57800000	0.0022488	1	1	-3.74424	44	粤电力A	73.15	B	23.24	9.01	18	15.5	7.4	1		master only (1)
539	2016	707000000	22680000000	17790000000	1286000000	70680000000	41340000000	29340000000	粤电力A	1993-11-26	广东省	广州市	天河区			D44	电力、热力生产和供应业	0.0181963	0.584921	24.9814	23	1.27468	-0.118283	27400000	0.0012076	1	1	-3.78815	230	粤电力A	64.13	B	17.02	8.11	18	11	10	1		master only (1)
539	2017	719000000	26640000000	23290000000	1138000000	71010000000	41300000000	29700000000	粤电力A	1993-11-26	广东省	广州市	天河区			D44	电力、热力生产和供应业	0.0160226	0.581693	24.986	24	1.14389	0.174712	51200000	0.0019223	1	1	-3.82711	2013	粤电力A	20.93	D	9.05	1.98	0	0	9.9	1	2000000	matched (3)
543	2010	36666.7	3784000000	3763000000	170000000	12700000000	7379000000	5323000000	皖能电力	1993-12-20	安徽省	合肥市	包河区			D44	电力、热力生产和供应业	0.0133824	0.58094	23.265	17	1.00569		110000000	0.0291958	2	0	-3.80468	1840	皖能电力	17.29	D	10.16	2.77	0	0	4.36	1		master only (1)
543	2011	36666.7	5150000000	5129000000	-90820219	14770000000	9859000000	4910000000	皖能电力	1993-12-20	安徽省	合肥市	包河区			D44	电力、热力生产和供应业	-0.0061491	0.667547	23.4158	18	1.00421	0.36099	60300000	0.0117122	2	0	-3.83229	2576	皖能电力	1.7	D	6.49	2.01	0	0	-6.8	1		master only (1)
543	2012	241795	7645000000	6871000000	376200000	17240000000	11550000000	5684000000	皖能电力	1993-12-20	安徽省	合肥市	包河区			D44	电力、热力生产和供应业	0.0218255	0.670248	23.5704	19	1.11265	0.484349	1588272	0.0002078	2	0	-3.85757	2538	皖能电力	11.97	D	8.48	2.02	0	0	1.47	1	30000	matched (3)
543	2013	1711645	12570000000	10050000000	1898000000	21830000000	11850000000	9976000000	皖能电力	1993-12-20	安徽省	合肥市	包河区			D44	电力、热力生产和供应业	0.0869254	0.543037	23.8066	20	1.25107	0.643932	55200000	0.0043885	2	0	-3.8711	769	皖能电力	29.77	D	23.05	1.69	0	0	5.03	1	2940000	matched (3)
543	2014	2257774	12870000000	10350000000	1632000000	22980000000	10470000000	12510000000	皖能电力	1993-12-20	安徽省	合肥市	包河区			D44	电力、热力生产和供应业	0.0710279	0.455475	23.858	21	1.24258	0.0237506	38300000	0.0029796	2	0	-3.9047	393	皖能电力	29.65	D	20.32	1.39	0	0	7.94	1	562000	matched (3)
543	2015	2406900	11300000000	8704000000	1981000000	22780000000	9678000000	13100000000	皖能电力	1993-12-20	安徽省	合肥市	包河区			D44	电力、热力生产和供应业	0.086965	0.424879	23.8491	22	1.29793	-0.121911	52300000	0.0046273	2	0	-3.94582	434	皖能电力	31.25	D	22.63	1.08	0	0	7.54	1	665460	matched (3)
543	2016	2941422	10630000000	9379000000	1218000000	27090000000	12210000000	14880000000	皖能电力	1993-12-20	安徽省	合肥市	包河区			D44	电力、热力生产和供应业	0.0449783	0.450682	24.0223	23	1.13372	-0.0587955	53000000	0.0049863	2	0	-3.96273	1671	皖能电力	22.86	D	16.27	0.91	0	0	5.68	1	2237909	matched (3)
543	2017	2945695	12210000000	11790000000	79292464	26550000000	12760000000	13780000000	皖能电力	1993-12-20	安徽省	合肥市	包河区			D44	电力、热力生产和供应业	0.0029868	0.480776	24.0022	24	1.03565	0.14802	39100000	0.0031994	2	0	-4.00554	2236	皖能电力	19.83	D	8.96	0.87	0	0	10	1	726111	matched (3)
545	2010	2824436	93543036	46982577	-47339069	223600000	262300000	-38739215	金浦钛业	1993-12-15	吉林省	吉林市	昌邑区	2	2	C26	化学原料及化学制品制造业	-0.21175	1.17328	19.2252	17	1.99101		0	0	2	0	-3.40856	2335	金浦钛业	2.56	D	1.26	1.3	0	0	0	1		master only (1)
545	2011	2824436	94723587	48778087	-5.56033e+06	195500000	239800000	-44299543	金浦钛业	1993-12-15	吉林省	吉林市	昌邑区	2	2	C26	化学原料及化学制品制造业	-0.0284375	1.22656	19.0912	18	1.94193	0.0126204	0	0	2	0	-3.41137	2519	金浦钛业	4.74	D	3.46	1.28	0	0	0	1		master only (1)
545	2012	2824436	98656398	43854605	3.1673e+06	193800000	236900000	-43132244	金浦钛业	1993-12-15	吉林省	吉林市	昌邑区	2	2	C26	化学原料及化学制品制造业	0.0163458	1.2226	19.0822	19	2.24962	0.0415188	0	0	2	0	-3.44881	2783	金浦钛业	-0.16	E	-2.72	2.56	0	0	0	1		master only (1)
545	2013	4058786	842100000	678700000	94924961	1173000000	419400000	754000000	金浦钛业	1993-12-15	吉林省	吉林市	昌邑区	2	2	C26	化学原料及化学制品制造业	0.0808955	0.357445	20.8832	20	1.24081	7.53611	16500000	0.0195883	2	0	-3.86094	1672	金浦钛业	21.16	D	13.39	3	0	0	4.77	0	28571.4	matched (3)
545	2014	4058786	734900000	634700000	41697527	2115000000	490500000	1624000000	金浦钛业	1993-12-15	吉林省	吉林市	昌邑区	2	2	C26	化学原料及化学制品制造业	0.0197198	0.231992	21.4721	21	1.158	-0.127292	26300000	0.0357522	2	0	-3.9621	2806	金浦钛业	14.93	D	9.3	3	0	0	2.63	0	52357.2	matched (3)
545	2015	4058786	709900000	600200000	131200000	2525000000	759600000	1765000000	金浦钛业	1993-12-15	吉林省	吉林市	昌邑区	2	2	C26	化学原料及化学制品制造业	0.0519568	0.300855	21.6494	22	1.18273	-0.0341135	43700000	0.0615685	2	0	-4.01468	1507	金浦钛业	22.04	D	14.33	2.37	0	0	5.34	0	107357	matched (3)
545	2016	16900000	1046000000	858700000	120800000	2696000000	792900000	1903000000	金浦钛业	1993-12-15	吉林省	吉林市	昌邑区	2	2	C26	化学原料及化学制品制造业	0.0448093	0.294113	21.715	23	1.21816	0.473607	17000000	0.0162792	2	0	-4.05864	2060	金浦钛业	20.77	D	13.63	2.14	0	0	5	0	107542	matched (3)
545	2017	16900000	1741000000	1320000000	165800000	2752000000	748400000	2004000000	金浦钛业	1993-12-15	吉林省	吉林市	昌邑区	2	2	C26	化学原料及化学制品制造业	0.060252	0.271909	21.7357	24	1.31894	0.664326	17400000	0.0099879	2	0	-4.09981	1253	金浦钛业	24.54	D	15.53	2.24	0	0	6.77	0	122357	matched (3)
552	2010	103000000	775900000	618700000	56546206	624200000	189500000	434600000	靖远煤电	1994-01-06	甘肃省	白银市	平川区			B06	煤炭开采和洗选业	0.0905958	0.303679	20.2519	16	1.25411		0	0	3	0	-3.60226	1785	靖远煤电	17.88	D	14.24	0.53	0	0	3.11	1		master only (1)
552	2011	103000000	1030000000	781700000	70813360	733500000	233000000	500500000	靖远煤电	1994-01-06	甘肃省	白银市	平川区			B06	煤炭开采和洗选业	0.0965408	0.317642	20.4134	17	1.3171	0.326906	0	0	3	0	-3.67075	1655	靖远煤电	19.94	D	13.69	2.35	0	0	3.9	1		master only (1)
552	2012	1240000000	4056000000	2824000000	447400000	5083000000	2917000000	2166000000	靖远煤电	1994-01-06	甘肃省	白银市	平川区			B06	煤炭开采和洗选业	0.0880072	0.573852	22.3492	18	1.43625	2.93931	3225000	0.0007952	3	0	-3.8779	1163	靖远煤电	25.04	D	17.43	4	0	0	3.61	1		master only (1)
552	2013	1240000000	3724000000	2698000000	428400000	5735000000	3129000000	2606000000	靖远煤电	1994-01-06	甘肃省	白银市	平川区			B06	煤炭开采和洗选业	0.0747077	0.54552	22.4698	19	1.38059	-0.0816951	4260000	0.0011438	3	0	-3.91765	1041	靖远煤电	25.74	D	19.1	4	0	0	2.64	1		master only (1)
552	2014	1250000000	3303000000	2430000000	332000000	6302000000	3593000000	2709000000	靖远煤电	1994-01-06	甘肃省	白银市	平川区			B06	煤炭开采和洗选业	0.0526834	0.570138	22.5641	20	1.35932	-0.11299	2851000	0.000863	3	0	-3.95658	1645	靖远煤电	20.8	D	15.15	4	0	0	1.65	1		master only (1)
552	2015	1250000000	2647000000	2070000000	180200000	9258000000	3135000000	6123000000	靖远煤电	1994-01-06	甘肃省	白银市	平川区			B06	煤炭开采和洗选业	0.0194662	0.338593	22.9487	21	1.27869	-0.198763	3266530	0.0012341	3	0	-3.98431	2584	靖远煤电	17.15	D	11.59	4	0	0	1.56	1		master only (1)
552	2016	1250000000	2978000000	2362000000	222500000	9041000000	2759000000	6283000000	靖远煤电	1994-01-06	甘肃省	白银市	平川区			B06	煤炭开采和洗选业	0.0246052	0.305095	22.9251	22	1.26072	0.124941	17600000	0.005906	3	0	-4.02543	2487	靖远煤电	18.64	D	12.25	4	0	0	2.39	1		master only (1)
552	2017	1250000000	3981000000	2657000000	552800000	9812000000	2942000000	6870000000	靖远煤电	1994-01-06	甘肃省	白银市	平川区			B06	煤炭开采和洗选业	0.0563425	0.299799	23.0069	23	1.49826	0.33686	13000000	0.0032753	3	0	-4.06135	850	靖远煤电	26.67	D	19.32	4	0	0	3.35	1		master only (1)
553	2010	9573700	1570000000	1324000000	23569180	2015000000	897400000	1118000000	安道麦A	1993-12-03	湖北省	荆州市	沙市区	2	2	C26	化学原料及化学制品制造业	0.0116977	0.445368	21.4238	17	1.18593		4781048	0.003045	2	0	-3.79821	2010	安道麦A	15.18	D	9.36	1.02	0	0	4.8	1		master only (1)
553	2011	13700000	1901000000	1597000000	53806512	2293000000	1127000000	1165000000	安道麦A	1993-12-03	湖北省	荆州市	沙市区	2	2	C26	化学原料及化学制品制造业	0.0234691	0.491651	21.553	18	1.19036	0.210788	3053885	0.0016064	2	0	-3.84817	2280	安道麦A	14.19	D	8.28	0.91	0	0	5	1		master only (1)
553	2012	14200000	2345000000	1952000000	104400000	2405000000	1141000000	1265000000	安道麦A	1993-12-03	湖北省	荆州市	沙市区	2	2	C26	化学原料及化学制品制造业	0.0434119	0.474181	21.601	19	1.20116	0.233589	3650935	0.0015568	2	0	-3.89151	1908	安道麦A	19.22	D	13.84	0.63	0	0	4.75	1	66666.7	matched (3)
553	2013	14000000	3078000000	2346000000	320000000	2708000000	1162000000	1546000000	安道麦A	1993-12-03	湖北省	荆州市	沙市区	2	2	C26	化学原料及化学制品制造业	0.118149	0.428993	21.7196	20	1.31203	0.312697	3270500	0.0010624	2	0	-3.9389	1126	安道麦A	25.03	D	18.29	2.06	0	0	4.68	1	244444	matched (3)
553	2014	14900000	3131000000	2192000000	491300000	2934000000	926900000	2007000000	安道麦A	1993-12-03	湖北省	荆州市	沙市区	2	2	C26	化学原料及化学制品制造业	0.167428	0.315886	21.7997	21	1.42828	0.0171251	4574874	0.0014611	2	0	-3.98322	688	安道麦A	26.22	D	19.43	2.07	0	0	4.72	1	66666.7	matched (3)
553	2015	18700000	2170000000	1729000000	142000000	2977000000	879900000	2097000000	安道麦A	1993-12-03	湖北省	荆州市	沙市区	2	2	C26	化学原料及化学制品制造业	0.0476798	0.295535	21.8143	22	1.25472	-0.306992	5585426	0.002574	2	0	-4.02394	1830	安道麦A	20.47	D	13.45	2.43	0	0	4.59	1	66666.7	matched (3)
553	2016	18700000	1855000000	1601000000	-74489987	2985000000	979800000	2005000000	安道麦A	1993-12-03	湖北省	荆州市	沙市区	2	2	C26	化学原料及化学制品制造业	-0.0249557	0.328263	21.8168	23	1.15836	-0.14526	5417801	0.0029211	2	0	-4.06407	3252	安道麦A	11.34	D	4.99	2.25	0	0	4.1	1	66666.7	matched (3)
553	2017	12300000000	23820000000	15400000000	1546000000	39610000000	20840000000	18780000000	安道麦A	1993-12-03	湖北省	荆州市	沙市区	2	2	C26	化学原料及化学制品制造业	0.0390236	0.525974	24.4025	24	1.54634	11.8426	0	0	2	0	-3.94299	2266	安道麦A	19.69	D	14.34	4	0	0	1.35	1		master only (1)
565	2010	20000000	436400000	331600000	-12832881	1423000000	756900000	665800000	渝三峡A	1994-04-08	重庆市	重庆市	江津区			C26	化学原料及化学制品制造业	-0.0090201	0.532023	21.0758	16	1.31609		5663534	0.0129779	3	0	-3.72423	1276	渝三峡A	20.89	D	11.89	4	0	0	5	1	215333	matched (3)
565	2011	20000000	501200000	399600000	-211300000	988500000	557100000	431400000	渝三峡A	1994-04-08	重庆市	重庆市	江津区			C26	化学原料及化学制品制造业	-0.213743	0.563589	20.7117	17	1.25413	0.148503	697000	0.0013907	3	0	-3.71753	514	渝三峡A	47.98	C	-1.91	15	11	23	0.89	1	270000	matched (3)
565	2012	8717.95	521300000	404900000	57732575	1049000000	468600000	580600000	渝三峡A	1994-04-08	重庆市	重庆市	江津区			C26	化学原料及化学制品制造业	0.0550265	0.446647	20.7713	18	1.28766	0.0401224	20400000	0.0390574	3	0	-3.76594	2620	渝三峡A	8.96	D	7.37	4	0	0	-2.41	1	270000	matched (3)
565	2013	8717.95	550600000	418800000	36666907	969500000	371900000	597600000	渝三峡A	1994-04-08	重庆市	重庆市	江津区			C26	化学原料及化学制品制造业	0.0378213	0.383621	20.6923	19	1.31459	0.056138	3859522	0.00701	3	0	-3.79471	1924	渝三峡A	19.63	D	14.11	4	0	0	1.52	1	270000	matched (3)
565	2014	8717.95	552800000	427000000	44586781	953200000	315600000	637600000	渝三峡A	1994-04-08	重庆市	重庆市	江津区			C26	化学原料及化学制品制造业	0.0467748	0.331116	20.6754	20	1.29469	0.0040828	2706157	0.0048951	3	0	-3.83223	2405	渝三峡A	17.51	D	14	1.54	0	0	1.97	1		master only (1)
565	2015	8717.95	648300000	501300000	144600000	1061000000	283200000	777600000	渝三峡A	1994-04-08	重庆市	重庆市	江津区			C26	化学原料及化学制品制造业	0.136285	0.26697	20.7823	21	1.29335	0.172779	1744250	0.0026903	3	0	-3.88747	1293	渝三峡A	23.36	D	21.29	1.87	0	0	0.2	1		master only (1)
565	2016	8717.95	2357000000	2179000000	223500000	1333000000	350200000	982500000	渝三峡A	1994-04-08	重庆市	重庆市	江津区			C26	化学原料及化学制品制造业	0.167695	0.262776	21.0104	22	1.08206	2.63591	1088742	0.0004619	3	0	-3.95668	2125	渝三峡A	20.4	D	17.87	2.16	0	0	0.37	1		master only (1)
565	2017	8717.95	3609000000	3426000000	81125366	1571000000	525400000	1046000000	渝三峡A	1994-04-08	重庆市	重庆市	江津区			C26	化学原料及化学制品制造业	0.051638	0.334427	21.175	23	1.05356	0.530993	2130386	0.0005903	3	0	-4.01497	2862	渝三峡A	15.67	D	12.43	1.73	0	0	1.51	1		master only (1)
576	2010	2297000	393400000	384100000	-77395186	701700000	379800000	321900000	广东甘化	1994-09-07	广东省	江门市	蓬江区			C22	造纸及纸制品业	-0.110295	0.541208	20.369	16	1.02429		7302906	0.0185622	1	1	-3.62315	2353	广东甘化	0.92	D	0.47	0.46	0	0	-0.01	1	47500	matched (3)
576	2011	2297000	387400000	401500000	-195800000	911900000	784600000	127300000	广东甘化	1994-09-07	广东省	江门市	蓬江区			C22	造纸及纸制品业	-0.214733	0.8604	20.631	17	0.96494	-0.0153675	76800000	0.198249	1	1	-3.70563	2646	广东甘化	-3.58	E	-11.27	4	0	0	3.69	0	97500	matched (3)
576	2012	2397000	469000000	428500000	47118912	919900000	737500000	182400000	广东甘化	1994-09-07	广东省	江门市	蓬江区			C22	造纸及纸制品业	0.051221	0.801702	20.6398	18	1.09474	0.210808	83900000	0.178903	1	1	-3.74695	2495	广东甘化	13.16	D	8.94	4	0	0	0.22	0	0	matched (3)
576	2013	486719	451100000	414200000	35957515	1477000000	458800000	1018000000	广东甘化	1994-09-07	广东省	江门市	蓬江区			C22	造纸及纸制品业	0.0243482	0.310645	21.1132	19	1.089	-0.0382238	22500000	0.0498104	1	1	-3.84837	2719	广东甘化	13.7	D	8.67	4	0	0	1.03	0	47619.1	matched (3)
576	2014	2788009	476100000	443000000	10005563	1456000000	428100000	1028000000	广东甘化	1994-09-07	广东省	江门市	蓬江区			C22	造纸及纸制品业	0.0068708	0.294005	21.0991	20	1.0748	0.0553924	19100000	0.040028	1	1	-3.88683	3301	广东甘化	4.24	D	6.45	2.79	0	0	-5	0	47619.1	matched (3)
576	2015	3543327	398100000	382200000	177300000	1958000000	752700000	1205000000	广东甘化	1994-09-07	广东省	江门市	蓬江区			C22	造纸及纸制品业	0.0905498	0.384404	21.3952	21	1.04164	-0.163752	26200000	0.0658446	1	1	-3.95581	2295	广东甘化	18.4	D	11.46	2.18	0	0	4.76	0	47619.1	matched (3)
576	2016	3686723	473200000	514300000	102400000	1576000000	268700000	1308000000	广东甘化	1994-09-07	广东省	江门市	蓬江区			C22	造纸及纸制品业	0.0649496	0.170435	21.1785	22	0.920153	0.188519	8857328	0.0187179	1	1	-3.97533	2874	广东甘化	16.37	D	9.44	1.93	0	0	5	0	47619.1	matched (3)
576	2017	3735780	475000000	462600000	-283800000	1210000000	184700000	1025000000	广东甘化	1994-09-07	广东省	江门市	蓬江区			C22	造纸及纸制品业	-0.234639	0.152709	20.9136	23	1.02683	0.003734	9430228	0.0198545	1	1	-3.98483	3335	广东甘化	6.11	D	-1.97	3.08	0	0	5	0	47619.1	matched (3)
589	2010	2964133	6227000000	5308000000	124900000	5479000000	3870000000	1609000000	黔轮胎A	1996-03-08	贵州省	贵阳市	乌当区	1	1	C29	橡胶和塑料制品业	0.022806	0.706288	22.4242	14	1.17319		10200000	0.0016302	3	0	-3.71789	1298	黔轮胎A	20.75	D	12.23	0.13	0	0	8.39	1	35714.3	matched (3)
589	2011	3768133	7536000000	6565000000	95974610	7063000000	4914000000	2149000000	黔轮胎A	1996-03-08	贵州省	贵阳市	乌当区	1	1	C29	橡胶和塑料制品业	0.0135891	0.695743	22.6781	15	1.14794	0.210298	45400000	0.0060244	3	0	-3.75427	1426	黔轮胎A	21.64	D	11.56	0.08	0	0	10	1	35717.3	matched (3)
589	2012	10300000	6597000000	5510000000	128500000	6735000000	4490000000	2245000000	黔轮胎A	1996-03-08	贵州省	贵阳市	乌当区	1	1	C29	橡胶和塑料制品业	0.0190719	0.66665	22.6306	16	1.19722	-0.124681	37000000	0.0056129	3	0	-3.79537	1693	黔轮胎A	20.85	D	12.57	0.23	0	0	8.05	1	0	matched (3)
589	2013	11200000	6478000000	5202000000	174300000	7572000000	5188000000	2384000000	黔轮胎A	1996-03-08	贵州省	贵阳市	乌当区	1	1	C29	橡胶和塑料制品业	0.0230266	0.685134	22.7477	17	1.24533	-0.0180294	28600000	0.0044206	3	0	-3.83231	1546	黔轮胎A	21.93	D	12.45	0.24	0	0	9.24	1		master only (1)
589	2014	11500000	5563000000	4443000000	167000000	9730000000	5956000000	3774000000	黔轮胎A	1996-03-08	贵州省	贵阳市	乌当区	1	1	C29	橡胶和塑料制品业	0.0171609	0.612106	22.9985	18	1.2522	-0.141129	44500000	0.0080033	3	0	-3.86179	2608	黔轮胎A	16.52	D	11.06	0.23	0	0	5.23	1	861710	matched (3)
589	2015	13300000	4733000000	4174000000	-258500000	11180000000	7691000000	3485000000	黔轮胎A	1996-03-08	贵州省	贵阳市	乌当区	1	1	C29	橡胶和塑料制品业	-0.0231307	0.688149	23.137	19	1.13413	-0.14919	15400000	0.0032558	3	0	-3.89366	3190	黔轮胎A	9.11	D	3.42	0.22	0	0	5.47	1	0	matched (3)
589	2016	19000000	5587000000	4989000000	14765428	10430000000	6849000000	3579000000	黔轮胎A	1996-03-08	贵州省	贵阳市	乌当区	1	1	C29	橡胶和塑料制品业	0.0014159	0.656792	23.0678	20	1.11983	0.18038	105000000	0.0188406	3	0	-3.93793	3406	黔轮胎A	4.17	D	6.56	0.17	0	0	-2.56	1		master only (1)
589	2017	20200000	6960000000	6431000000	-221700000	9715000000	6376000000	3340000000	黔轮胎A	1996-03-08	贵州省	贵阳市	乌当区	1	1	C29	橡胶和塑料制品业	-0.0228185	0.656262	22.997	21	1.08214	0.245614	15900000	0.0022905	3	0	-3.98187	3411	黔轮胎A	2.86	D	-4.25	0.53	0	0	6.58	1		master only (1)
591	2010	6739113	4344000000	3912000000	18627475	2295000000	1764000000	531200000	太阳能	1996-02-08	重庆市	重庆市	渝中区			D44	电力、热力生产和供应业	0.0081158	0.768555	21.5541	14	1.11045		5089777	0.0011718	3	0	-3.68825	1619	太阳能	19.09	D	9.68	0.23	0	0	9.18	1		master only (1)
591	2011	8800610	4783000000	4191000000	3.1755e+06	2698000000	2185000000	513100000	太阳能	1996-02-08	重庆市	重庆市	渝中区			D44	电力、热力生产和供应业	0.0011771	0.809792	21.7157	15	1.14112	0.101039	4588739	0.0009595	3	0	-3.73868	2060	太阳能	17.1	D	6.91	0.19	0	0	10	1		master only (1)
591	2012	11600000	4708000000	4046000000	19035471	2924000000	2392000000	532500000	太阳能	1996-02-08	重庆市	重庆市	渝中区			D44	电力、热力生产和供应业	0.0065091	0.817918	21.7964	16	1.16356	-0.0155185	494094	0.0001049	3	0	-3.78305	2054	太阳能	18.31	D	8.08	0.23	0	0	10	1		master only (1)
591	2013	12200000	4635000000	3965000000	20238077	3171000000	2611000000	560500000	太阳能	1996-02-08	重庆市	重庆市	渝中区			D44	电力、热力生产和供应业	0.0063819	0.823249	21.8774	17	1.16918	-0.0154996	2336262	0.000504	3	0	-3.82687	1348	太阳能	23.34	D	13.1	0.24	0	0	10	1		master only (1)
591	2014	12300000	4749000000	4022000000	-4.25716e+06	3324000000	2847000000	477800000	太阳能	1996-02-08	重庆市	重庆市	渝中区			D44	电力、热力生产和供应业	-0.0012806	0.856287	21.9245	18	1.18069	0.0244795	247000	5.2e-05	3	0	-3.86883	2533	太阳能	16.89	D	6.67	0.22	0	0	10	1		master only (1)
591	2015	3405185	3630000000	2380000000	493200000	22740000000	16520000000	6219000000	太阳能	1996-02-08	重庆市	重庆市	渝中区			D44	电力、热力生产和供应业	0.0216901	0.726502	23.8473	19	1.5255	-0.235534	33100000	0.0091231	3	0	-3.82605	2816	太阳能	15.49	D	13.11	0.03	0	0	2.35	1		master only (1)
591	2016	6267824	4333000000	2909000000	678600000	29770000000	18250000000	11520000000	太阳能	1996-02-08	重庆市	重庆市	渝中区			D44	电力、热力生产和供应业	0.0227964	0.612976	24.1167	20	1.48943	0.193704	33900000	0.0078212	3	0	-3.82905	2873	太阳能	16.37	D	13.87	0.07	0	0	2.43	1		master only (1)
591	2017	7558181	5205000000	3414000000	810600000	31550000000	19300000000	12250000000	太阳能	1996-02-08	重庆市	重庆市	渝中区			D44	电力、热力生产和供应业	0.0256948	0.611733	24.1748	21	1.52458	0.201059	31200000	0.0059942	3	0	-3.86026	2555	太阳能	18.05	D	16.27	0.06	0	0	1.72	1		master only (1)
599	2010	7296817	5778000000	5330000000	36444062	4709000000	3230000000	1479000000	青岛双星	1996-04-30	山东省	青岛市	黄岛区			C29	橡胶和塑料制品业	0.0077391	0.685971	22.2728	14	1.08393		25500000	0.0044147	1	1	-3.71741	2072	青岛双星	14.47	D	9.47	0.52	0	0	4.48	1		master only (1)
599	2011	7813262	6315000000	5816000000	36075340	4916000000	3401000000	1515000000	青岛双星	1996-04-30	山东省	青岛市	黄岛区			C29	橡胶和塑料制品业	0.0073387	0.691834	22.3157	15	1.08587	0.0930612	16800000	0.0026672	1	1	-3.75775	2395	青岛双星	11.67	D	7.54	0.56	0	0	3.57	1		master only (1)
599	2012	8075119	5909000000	5376000000	20997920	4814000000	3278000000	1536000000	青岛双星	1996-04-30	山东省	青岛市	黄岛区			C29	橡胶和塑料制品业	0.0043617	0.680971	22.2948	16	1.09902	-0.0644421	20700000	0.0034992	1	1	-3.79761	2007	青岛双星	18.57	D	7.93	0.64	0	0	10	1		master only (1)
599	2013	8076743	5272000000	4738000000	27660118	4862000000	3303000000	1559000000	青岛双星	1996-04-30	山东省	青岛市	黄岛区			C29	橡胶和塑料制品业	0.005689	0.679285	22.3047	17	1.11271	-0.107766	20200000	0.0038223	1	1	-3.83768	2032	青岛双星	19.09	D	8.28	0.81	0	0	10	1		master only (1)
599	2014	22000000	3978000000	3402000000	58169871	5051000000	2548000000	2503000000	青岛双星	1996-04-30	山东省	青岛市	黄岛区			C29	橡胶和塑料制品业	0.0115155	0.504491	22.3429	18	1.16922	-0.245417	26500000	0.006673	1	1	-3.87788	2118	青岛双星	18.65	D	8.4	0.89	0	0	9.36	1		master only (1)
599	2015	30900000	2994000000	2410000000	59199321	5905000000	3310000000	2595000000	青岛双星	1996-04-30	山东省	青岛市	黄岛区			C29	橡胶和塑料制品业	0.0100258	0.560562	22.499	19	1.2421	-0.247433	15500000	0.005164	1	1	-3.9174	2808	青岛双星	15.54	D	8.84	0.77	0	0	5.93	1		master only (1)
599	2016	46700000	4928000000	4206000000	77918336	7248000000	4548000000	2700000000	青岛双星	1996-04-30	山东省	青岛市	黄岛区			C29	橡胶和塑料制品业	0.0107498	0.627498	22.704	20	1.17146	0.646029	34200000	0.00695	1	1	-3.95359	2832	青岛双星	16.65	D	9.51	0.87	0	0	6.27	1		master only (1)
599	2017	73700000	3998000000	3249000000	102000000	8380000000	5573000000	2807000000	青岛双星	1996-04-30	山东省	青岛市	黄岛区			C29	橡胶和塑料制品业	0.0121671	0.665051	22.8491	21	1.23035	-0.18872	96000000	0.0240188	1	1	-3.98871	2667	青岛双星	17.33	D	9.86	0.94	0	0	6.53	1		master only (1)
600	2010	16100000	5410000000	4771000000	37321672	12130000000	8031000000	4096000000	建投能源	1996-06-06	河北省	石家庄市	石家庄市			D44	电力、热力生产和供应业	0.0030776	0.662253	23.2187	14	1.13393		6439074	0.0011901	1	1	-3.68809	1150	建投能源	21.6	D	8.6	3	0	0	10	1	5037500	matched (3)
600	2011	16600000	6032000000	5306000000	16276843	15600000000	11530000000	4068000000	建投能源	1996-06-06	河北省	石家庄市	石家庄市			D44	电力、热力生产和供应业	0.0010434	0.739262	23.4706	15	1.13684	0.114907	6316953	0.0010472	1	1	-3.70731	1323	建投能源	22.42	D	9.42	3	0	0	10	1		master only (1)
600	2012	17900000	6420000000	5369000000	170400000	17010000000	12780000000	4229000000	建投能源	1996-06-06	河北省	石家庄市	石家庄市			D44	电力、热力生产和供应业	0.0100171	0.751395	23.557	16	1.19581	0.064312	12200000	0.0018988	1	1	-3.73892	1098	建投能源	25.57	D	12.57	3	0	0	10	1	6016111	matched (3)
600	2013	19300000	8702000000	6462000000	1073000000	18000000000	12820000000	5181000000	建投能源	1996-06-06	河北省	石家庄市	石家庄市			D44	电力、热力生产和供应业	0.0596316	0.712163	23.6136	17	1.34659	0.355393	10900000	0.0012505	1	1	-3.77308	780	建投能源	29.51	D	21.59	3	0	0	4.92	1		master only (1)
600	2014	26600000	10890000000	6826000000	2660000000	25270000000	14300000000	10960000000	建投能源	1996-06-06	河北省	石家庄市	石家庄市			D44	电力、热力生产和供应业	0.105283	0.566119	23.9527	18	1.59554	0.251603	12700000	0.0011667	1	1	-3.77231	284	建投能源	31.65	D	23.72	2.51	0	0	5.42	1	800000	matched (3)
600	2015	29200000	9626000000	5678000000	2624000000	25850000000	13280000000	12570000000	建投能源	1996-06-06	河北省	石家庄市	石家庄市			D44	电力、热力生产和供应业	0.101538	0.513648	23.9754	19	1.69525	-0.11617	14900000	0.0015487	1	1	-3.80924	336	建投能源	34.58	D	24.19	3	0	0	7.39	1	4900446	matched (3)
600	2016	29700000	9387000000	6440000000	1945000000	29240000000	15970000000	13270000000	建投能源	1996-06-06	河北省	石家庄市	石家庄市			D44	电力、热力生产和供应业	0.0665213	0.546095	24.0988	20	1.45763	-0.0248137	23600000	0.0025092	1	1	-3.8317	613	建投能源	33.58	D	23.03	3	0	0	7.55	1	4828246	matched (3)
600	2017	58400000	10540000000	8919000000	312300000	31160000000	18170000000	12990000000	建投能源	1996-06-06	河北省	石家庄市	石家庄市			D44	电力、热力生产和供应业	0.0100214	0.583054	24.1625	21	1.18146	0.122576	26600000	0.0025232	1	1	-3.86213	1079	建投能源	25.44	D	12.44	3	0	0	10	1	6755645	matched (3)
601	2010	4046503	2121000000	1569000000	68092980	8405000000	5207000000	3198000000	韶能股份	1996-08-30	广东省	韶关市	武江区	1	2	D44	电力、热力生产和供应业	0.0081017	0.619481	22.8521	14	1.3524		20000000	0.0094068	1	1	-3.70859	1425	韶能股份	20.01	D	9.73	0.28	0	0	10	1		master only (1)
601	2011	4046503	2110000000	1610000000	87141536	8170000000	4919000000	3251000000	韶能股份	1996-08-30	广东省	韶关市	武江区	1	2	D44	电力、热力生产和供应业	0.0106654	0.602083	22.8238	15	1.31019	-0.0055469	17100000	0.0081127	1	1	-3.74969	2111	韶能股份	16.5	D	6.23	0.27	0	0	10	1		master only (1)
601	2012	4046503	2149000000	1494000000	147700000	8487000000	5118000000	3369000000	韶能股份	1996-08-30	广东省	韶关市	武江区	1	2	D44	电力、热力生产和供应业	0.0174043	0.603036	22.8618	16	1.43808	0.0186294	10400000	0.0048244	1	1	-3.78819	1317	韶能股份	23.56	D	13.56	0.41	0	0	9.59	1		master only (1)
601	2013	4240786	2340000000	1553000000	234400000	8690000000	4961000000	3729000000	韶能股份	1996-08-30	广东省	韶关市	武江区	1	2	D44	电力、热力生产和供应业	0.0269719	0.570881	22.8854	17	1.50623	0.0887693	19300000	0.0082386	1	1	-3.8272	1033	韶能股份	25.79	D	16.75	0.39	0	0	8.65	1		master only (1)
601	2014	23200000	3010000000	2181000000	270900000	8612000000	4614000000	3997000000	韶能股份	1996-08-30	广东省	韶关市	武江区	1	2	D44	电力、热力生产和供应业	0.03146	0.535824	22.8764	18	1.3801	0.286304	17000000	0.0056353	1	1	-3.86759	889	韶能股份	24.82	D	17.5	0.45	0	0	6.87	1	120000	matched (3)
601	2015	24300000	3007000000	2078000000	301500000	8508000000	4310000000	4198000000	韶能股份	1996-08-30	广东省	韶关市	武江区	1	2	D44	电力、热力生产和供应业	0.0354438	0.506576	22.8642	19	1.44684	-0.0007639	16800000	0.0055914	1	1	-3.90809	497	韶能股份	30.06	D	19.16	0.9	0	0	10	1	50000	matched (3)
601	2016	25100000	3199000000	2087000000	463200000	8833000000	4335000000	4498000000	韶能股份	1996-08-30	广东省	韶关市	武江区	1	2	D44	电力、热力生产和供应业	0.0524407	0.490746	22.9018	20	1.53275	0.0636945	29500000	0.0092319	1	1	-3.94649	664	韶能股份	31.75	D	21.25	1.47	0	0	9.03	1	251282	matched (3)
601	2017	25200000	3594000000	2583000000	458500000	9167000000	4426000000	4741000000	韶能股份	1996-08-30	广东省	韶关市	武江区	1	2	D44	电力、热力生产和供应业	0.0500154	0.482853	22.9388	21	1.39155	0.123591	43300000	0.0120561	1	1	-3.98478	394	韶能股份	29.64	D	20.52	0.68	0	0	8.44	0	261808	matched (3)
603	2010	73800000	18359688	14053579	3.23264e+06	153800000	77705621	76136581	盛达矿业	1996-08-23	北京市	北京市	大兴区			B09	有色金属矿采选业	0.0210127	0.5051	18.8514	14	1.30641		0	0	1	1	-3.18097	1914	盛达矿业	16.56	D	7.56	4	0	0	5	0		master only (1)
603	2011	170000000	941800000	117700000	559200000	1051000000	354600000	696100000	盛达矿业	1996-08-23	北京市	北京市	大兴区			B09	有色金属矿采选业	0.532228	0.337488	20.7728	15	8.00117	50.2988	10000000	0.0106176	1	1	-3.64615	687	盛达矿业	29.92	D	22.86	2.48	0	0	4.58	0		master only (1)
603	2012	170000000	922800000	117900000	542800000	1051000000	257700000	793000000	盛达矿业	1996-08-23	北京市	北京市	大兴区			B09	有色金属矿采选业	0.516576	0.245279	20.7727	16	7.82953	-0.0201554	0	0	1	1	-3.68615	1283	盛达矿业	23.98	D	16.98	2.61	0	0	4.39	0		master only (1)
603	2013	170000000	843000000	146400000	460800000	781000000	254000000	527100000	盛达矿业	1996-08-23	北京市	北京市	大兴区			B09	有色金属矿采选业	0.590022	0.325184	20.4761	17	5.75964	-0.0865227	10700000	0.0127379	1	1	-3.68123	1466	盛达矿业	22.48	D	16.47	1.55	0	0	4.46	0		master only (1)
603	2014	170000000	741200000	145600000	378200000	1125000000	314300000	810700000	盛达矿业	1996-08-23	北京市	北京市	大兴区			B09	有色金属矿采选业	0.336186	0.279382	20.8411	18	5.08965	-0.120739	0	0	1	1	-3.77542	1148	盛达矿业	23.37	D	16.25	2.58	0	0	4.54	0		master only (1)
603	2015	170000000	824300000	171200000	417500000	1409000000	356200000	1052000000	盛达矿业	1996-08-23	北京市	北京市	大兴区			B09	有色金属矿采选业	0.296392	0.252861	21.0658	19	4.81564	0.112144	0	0	1	1	-3.8431	2905	盛达矿业	14.55	D	7.63	2.17	0	0	4.75	0		master only (1)
603	2016	263000000	686400000	148600000	331400000	2841000000	194600000	2647000000	盛达矿业	1996-08-23	北京市	北京市	大兴区			B09	有色金属矿采选业	0.116654	0.068488	21.7675	20	4.61921	-0.167356	182700	0.0002662	1	1	-3.94155	2018	盛达矿业	21	D	14.54	1.93	0	0	4.53	0		master only (1)
603	2017	263000000	1334000000	585100000	462100000	4219000000	1288000000	2931000000	盛达矿业	1996-08-23	北京市	北京市	大兴区			B09	有色金属矿采选业	0.109511	0.305247	22.1629	21	2.28025	0.943738	151500	0.0001136	1	1	-3.99583	1905	盛达矿业	21.43	D	15.55	1.31	0	0	4.57	0		master only (1)
611	2010	12700000	347600000	255400000	32929116	931700000	175300000	756300000	天首发展	1996-10-08	内蒙古自治区	包头市	青山区	2	2	C17	纺织业	0.0353445	0.188211	20.6525	14	1.36089		16615	4.78e-05	3	0	-3.58885	2047	天首发展	14.77	D	11.28	0.92	0	0	2.57	0		master only (1)
611	2011	0	163300000	134200000	6.09952e+06	641100000	10751175	630300000	天首发展	1996-10-08	内蒙古自治区	包头市	青山区	2	2	C17	纺织业	0.0095145	0.0167704	20.2787	15	1.21676	-0.530211	1495000	0.0091544	3	0	-3.56713	2427	天首发展	10.46	D	0.46	0	0	0	10	0		master only (1)
611	2012	0	183100000	167000000	-46122298	717600000	133400000	584200000	天首发展	1996-10-08	内蒙古自治区	包头市	青山区	2	2	C17	纺织业	-0.0642763	0.185848	20.3914	16	1.09625	0.12119	0	0	3	0	-3.62701	2792	天首发展	-0.57	E	0.65	0	0	0	-1.22	0		master only (1)
611	2013	18300	1154000000	1130000000	11398700	739800000	144200000	595600000	天首发展	1996-10-08	内蒙古自治区	包头市	青山区	2	2	C17	纺织业	0.0154085	0.194867	20.4218	17	1.02093	5.30082	0	0	3	0	-3.67219	2728	天首发展	13.61	D	7.91	0.12	0	0	5.58	0		master only (1)
611	2014	50000000	67177065	73955282	-50238468	707800000	162400000	545400000	天首发展	1996-10-08	内蒙古自治区	包头市	青山区	2	2	C17	纺织业	-0.0709784	0.229481	20.3777	18	0.908347	-0.941772	0	0	3	0	-3.70465	3401	天首发展	0.71	D	0.68	1.48	0	0	-1.45	0		master only (1)
611	2015	50000000	33914247	33108547	-356100000	402300000	213000000	189300000	天首发展	1996-10-08	内蒙古自治区	包头市	青山区	2	2	C17	纺织业	-0.885142	0.529385	19.8126	19	1.02433	-0.495151	0	0	3	0	-3.63336	3514	天首发展	-1.57	E	-3.06	1.49	0	0	0	0		master only (1)
611	2016	18300	29829250	29184417	5.12888e+06	416800000	221700000	195000000	天首发展	1996-10-08	内蒙古自治区	包头市	青山区	2	2	C17	纺织业	0.0123058	0.532034	19.8481	20	1.02209	-0.120451	50000000	1.67621	3	0	-3.68115	2812	天首发展	16.82	D	5.72	1.1	0	0	10	0		master only (1)
611	2017	1120000000	40779335	38869771	-21527841	1912000000	1144000000	768600000	天首发展	1996-10-08	内蒙古自治区	包头市	青山区	2	2	C17	纺织业	-0.0112565	0.598095	21.3717	21	1.04913	0.367092	0	0	3	0	-3.95378	3561	天首发展	-5.28	E	-6.46	1.18	0	0	0	0		master only (1)
612	2010	6571982	5594000000	5149000000	115800000	3956000000	1914000000	2042000000	焦作万方	1996-09-26	河南省	焦作市	马村区			C32	有色金属冶炼和压延加工业	0.0292598	0.483829	22.0986	14	1.08648		1918199	0.0003429	2	0	-3.71442	508	焦作万方	41.34	C	11.63	7.71	12	15	-5	1	1208394	matched (3)
612	2011	4335202	5970000000	5750000000	381300000	4922000000	2471000000	2451000000	焦作万方	1996-09-26	河南省	焦作市	马村区			C32	有色金属冶炼和压延加工业	0.0774638	0.502092	22.317	15	1.0381	0.0671335	6279927	0.001052	2	0	-3.75776	295	焦作万方	60.31	B	14.42	9.84	12	23	1.05	1	7410188	matched (3)
612	2012	4335202	6124000000	6233000000	-15358550	6151000000	3703000000	2448000000	焦作万方	1996-09-26	河南省	焦作市	马村区			C32	有色金属冶炼和压延加工业	-0.0024969	0.602019	22.5399	16	0.982509	0.0258463	61200000	0.0099972	2	0	-3.79693	436	焦作万方	59	C	6.96	7.54	15	23	6.5	1	635762	matched (3)
612	2013	4444604	5616000000	5336000000	260100000	7195000000	2872000000	4324000000	焦作万方	1996-09-26	河南省	焦作市	马村区			C32	有色金属冶炼和压延加工业	0.0361514	0.399113	22.6967	17	1.05242	-0.0829781	55900000	0.0099622	2	0	-3.83379	2804	焦作万方	12.42	D	9.86	1.5	0	0	1.06	0	635762	matched (3)
612	2014	1690000000	5250000000	4781000000	356400000	9147000000	4419000000	4728000000	焦作万方	1996-09-26	河南省	焦作市	马村区			C32	有色金属冶炼和压延加工业	0.0389695	0.48312	22.9367	18	1.0981	-0.0651771	10500000	0.002009	2	0	-3.86489	2913	焦作万方	13.92	D	10.53	1.17	0	0	2.22	0	835762	matched (3)
612	2015	4444604	4658000000	4463000000	-62522961	8628000000	3864000000	4764000000	焦作万方	1996-09-26	河南省	焦作市	马村区			C32	有色金属冶炼和压延加工业	-0.0072462	0.447863	22.8783	19	1.04374	-0.112637	5665762	0.0012163	2	0	-3.90751	3124	焦作万方	11.66	D	5.86	0.8	0	0	5	0	729095	matched (3)
612	2016	4444604	3926000000	3459000000	99223617	7283000000	2759000000	4523000000	焦作万方	1996-09-26	河南省	焦作市	马村区			C32	有色金属冶炼和压延加工业	0.0136249	0.378894	22.7087	20	1.13492	-0.157211	10700000	0.0027154	2	0	-3.95346	3375	焦作万方	6.01	D	0.45	1.07	0	0	4.49	0	5060762	matched (3)
612	2017	4444604	5017000000	4811000000	175700000	7465000000	2755000000	4710000000	焦作万方	1996-09-26	河南省	焦作市	马村区			C32	有色金属冶炼和压延加工业	0.0235414	0.369023	22.7335	21	1.04276	0.277831	4090462	0.0008154	2	0	-3.99275	3094	焦作万方	13.23	D	10.39	1.18	0	0	1.66	0	154762	matched (3)
619	2010	6490204	3963000000	3530000000	183500000	3338000000	1189000000	2148000000	海螺型材	1996-10-23	安徽省	芜湖市	鸠江区			C29	橡胶和塑料制品业	0.0549829	0.356334	21.9285	14	1.12257		34000000	0.008582	2	0	-3.70899	1827	海螺型材	17.46	D	12.99	0.83	0	0	3.64	1		master only (1)
619	2011	7040390	4073000000	3707000000	115600000	4058000000	1833000000	2225000000	海螺型材	1996-10-23	安徽省	芜湖市	鸠江区			C29	橡胶和塑料制品业	0.0284818	0.451667	22.124	15	1.09877	0.0278586	62100000	0.0152371	2	0	-3.75502	1883	海螺型材	18.51	D	12.57	1.05	0	0	4.89	1		master only (1)
619	2012	7350030	4196000000	3607000000	231200000	4488000000	2052000000	2435000000	海螺型材	1996-10-23	安徽省	芜湖市	鸠江区			C29	橡胶和塑料制品业	0.0515136	0.457357	22.2246	16	1.16326	0.0302954	44300000	0.0105572	2	0	-3.79685	1644	海螺型材	21.21	D	16.46	1.19	0	0	3.56	1		master only (1)
619	2013	7519261	4053000000	3487000000	160800000	4346000000	1799000000	2547000000	海螺型材	1996-10-23	安徽省	芜湖市	鸠江区			C29	橡胶和塑料制品业	0.0370052	0.41399	22.1925	17	1.16234	-0.0342634	23900000	0.0058935	2	0	-3.83636	1418	海螺型材	22.83	D	15.3	4	0	0	3.53	1		master only (1)
619	2014	7638919	3904000000	3350000000	122100000	4060000000	1437000000	2623000000	海螺型材	1996-10-23	安徽省	芜湖市	鸠江区			C29	橡胶和塑料制品业	0.0300618	0.353839	22.1245	18	1.16532	-0.0366894	24700000	0.0063328	2	0	-3.87503	1310	海螺型材	22.44	D	15.33	2.11	0	0	5	1		master only (1)
619	2015	7904638	3429000000	2890000000	117800000	3909000000	1256000000	2653000000	海螺型材	1996-10-23	安徽省	芜湖市	鸠江区			C29	橡胶和塑料制品业	0.0301353	0.321319	22.0866	19	1.18658	-0.121637	47800000	0.0139366	2	0	-3.91412	1504	海螺型材	22.05	D	14.9	2.15	0	0	5	1		master only (1)
619	2016	7904638	3185000000	2720000000	87129774	3875000000	1209000000	2666000000	海螺型材	1996-10-23	安徽省	芜湖市	鸠江区			C29	橡胶和塑料制品业	0.0224829	0.312097	22.0779	20	1.17091	-0.0713254	36700000	0.0115142	2	0	-3.9539	2269	海螺型材	19.75	D	12.93	1.92	0	0	4.9	1		master only (1)
619	2017	7900364	3088000000	2726000000	14781623	3519000000	887300000	2631000000	海螺型材	1996-10-23	安徽省	芜湖市	鸠江区			C29	橡胶和塑料制品业	0.0042011	0.252183	21.9813	21	1.1327	-0.030415	57800000	0.0187171	2	0	-3.99094	2981	海螺型材	14.54	D	7.82	1.72	0	0	5	1		master only (1)
629	2010	1520000000	43250000000	36450000000	1062000000	59730000000	43350000000	16370000000	攀钢钒钛	1996-11-15	四川省	攀枝花市	东区			C32	有色金属冶炼和压延加工业	0.0177823	0.725846	24.8131	14	1.18641		320000000	0.0073947	3	0	-3.46451	2149	攀钢钒钛	12.96	D	10.01	2.47	0	0	0.48	1	0	matched (3)
629	2011	2510000000	52540000000	44730000000	12629198	31330000000	16470000000	14860000000	攀钢钒钛	1996-11-15	四川省	攀枝花市	东区			C32	有色金属冶炼和压延加工业	0.0004031	0.525744	24.1679	15	1.17473	0.214916	108000000	0.0020472	3	0	-3.62131	498	攀钢钒钛	49.2	C	7.91	11.29	11	14	5	1		master only (1)
629	2012	2510000000	15600000000	11430000000	598500000	31060000000	15670000000	15390000000	攀钢钒钛	1996-11-15	四川省	攀枝花市	东区			C32	有色金属冶炼和压延加工业	0.019269	0.504488	24.1592	16	1.36537	-0.703039	32100000	0.0020605	3	0	-3.66264	434	攀钢钒钛	59.27	C	9.31	12.46	15	14	8.5	1		master only (1)
629	2013	2510000000	15600000000	11480000000	562100000	35750000000	20640000000	15110000000	攀钢钒钛	1996-11-15	四川省	攀枝花市	东区			C32	有色金属冶炼和压延加工业	0.015723	0.577386	24.2998	17	1.35921	-4.6e-05	35200000	0.002253	3	0	-3.68035	2718	攀钢钒钛	13.71	D	7.72	0.99	0	0	5	1	8280000	matched (3)
629	2014	2580000000	16780000000	12720000000	-5972000000	52350000000	40180000000	12170000000	攀钢钒钛	1996-11-15	四川省	攀枝花市	东区			C32	有色金属冶炼和压延加工业	-0.114082	0.767554	24.6811	18	1.31893	0.0754669	20300000	0.0012116	3	0	-3.65131	3458	攀钢钒钛	-1.88	E	-1.74	0.62	0	0	-0.76	1	2250000	matched (3)
629	2015	2580000000	11420000000	9947000000	-2422000000	56010000000	46260000000	9754000000	攀钢钒钛	1996-11-15	四川省	攀枝花市	东区			C32	有色金属冶炼和压延加工业	-0.0432488	0.825853	24.7488	19	1.14788	-0.319552	39400000	0.0034539	3	0	-3.67774	3491	攀钢钒钛	-0.65	E	-0.66	0.63	0	0	-0.62	1	6140000	matched (3)
629	2016	13900000	10610000000	9821000000	-6570000000	9621000000	6014000000	3607000000	攀钢钒钛	1996-11-15	四川省	攀枝花市	东区			C32	有色金属冶炼和压延加工业	-0.682897	0.625044	22.9872	20	1.08029	-0.0707199	50600000	0.0047713	3	0	-3.94238	593	攀钢钒钛	34.13	D	-10.23	9.47	12	23	-0.11	1	0	matched (3)
629	2017	13900000	9436000000	7761000000	919900000	10470000000	5935000000	4539000000	攀钢钒钛	1996-11-15	四川省	攀枝花市	东区			C32	有色金属冶炼和压延加工业	0.0878337	0.566641	23.0721	21	1.21573	-0.110674	0	0	3	0	-3.97768	3071	攀钢钒钛	13.56	D	11.69	0.59	0	0	1.28	1		master only (1)
630	2010	307000000	51300000000	48810000000	1007000000	32170000000	23900000000	8269000000	铜陵有色	1996-11-20	安徽省	铜陵市	铜官区			C32	有色金属冶炼和压延加工业	0.0313039	0.742978	24.1944	14	1.051		192000000	0.0037444	2	0	-3.57723	376	铜陵有色	51.42	C	14.3	12.88	9	12	3.24	1	1600000	matched (3)
630	2011	307000000	70740000000	66830000000	1534000000	32270000000	20830000000	11440000000	铜陵有色	1996-11-20	安徽省	铜陵市	铜官区			C32	有色金属冶炼和压延加工业	0.0475516	0.645426	24.1973	15	1.05857	0.378858	272000000	0.0038452	2	0	-3.61677	30	铜陵有色	77.55	B	14.82	14.5	15	27	6.23	1	1020000	matched (3)
630	2012	317000000	77260000000	74400000000	780400000	39890000000	27820000000	12080000000	铜陵有色	1996-11-20	安徽省	铜陵市	铜官区			C32	有色金属冶炼和压延加工业	0.0195632	0.697281	24.4095	16	1.03842	0.0921412	251000000	0.0032488	2	0	-3.62177	410	铜陵有色	60.14	B	13.93	13.29	11	17	4.92	1	80000	matched (3)
630	2013	345000000	76160000000	74130000000	550100000	39750000000	27790000000	11960000000	铜陵有色	1996-11-20	安徽省	铜陵市	铜官区			C32	有色金属冶炼和压延加工业	0.0138396	0.699186	24.4058	17	1.02746	-0.0141607	217000000	0.0028426	2	0	-3.66241	496	铜陵有色	59.26	C	13.52	12.83	12	17	3.91	1	0	matched (3)
630	2014	618000000	88820000000	86150000000	337300000	46930000000	31260000000	15670000000	铜陵有色	1996-11-20	安徽省	铜陵市	铜官区			C32	有色金属冶炼和压延加工业	0.0071882	0.666115	24.5719	18	1.03099	0.166137	196000000	0.0022067	2	0	-3.67237	2588	铜陵有色	16.62	D	10.31	2.02	0	0	4.29	1		master only (1)
630	2015	668000000	86900000000	84640000000	-729800000	44170000000	29540000000	14630000000	铜陵有色	1996-11-20	安徽省	铜陵市	铜官区			C32	有色金属冶炼和压延加工业	-0.0165239	0.66883	24.5113	19	1.02668	-0.0216383	138000000	0.0015891	2	0	-3.72361	259	铜陵有色	50.25	C	6.21	12.82	12	14	5.22	1		master only (1)
630	2016	677000000	86670000000	83490000000	324400000	44590000000	27070000000	17530000000	铜陵有色	1996-11-20	安徽省	铜陵市	铜官区			C32	有色金属冶炼和压延加工业	0.0072748	0.60694	24.5209	20	1.0381	-0.0025605	134000000	0.0015437	2	0	-3.76185	380	铜陵有色	57.73	C	7.94	12.79	15	17	5	1		master only (1)
630	2017	681000000	82430000000	78340000000	741200000	47790000000	29220000000	18580000000	铜陵有色	1996-11-20	安徽省	铜陵市	铜官区			C32	有色金属冶炼和压延加工业	0.0155083	0.611346	24.5902	21	1.05217	-0.0489633	127000000	0.0015439	2	0	-3.78891	2646	铜陵有色	17.5	D	10.26	2.24	0	0	5	1		master only (1)
635	2010	737783	2468000000	2001000000	130800000	3679000000	2744000000	934600000	英力特	1996-11-20	宁夏回族自治区	石嘴山市	惠农区	2	2	C26	化学原料及化学制品制造业	0.0355511	0.745928	22.0258	14	1.2332		5744480	0.0023279	3	0	-3.7124	453	英力特	47.83	C	14.49	5.77	5	19	3.57	1	250000	matched (3)
635	2011	737783	2800000000	2344000000	104400000	3750000000	2745000000	1005000000	英力特	1996-11-20	宁夏回族自治区	石嘴山市	惠农区	2	2	C26	化学原料及化学制品制造业	0.0278446	0.731939	22.045	15	1.19497	0.134887	8818313	0.0031489	3	0	-3.75298	328	英力特	58.33	C	11.5	8.75	14	24	0.08	1	0	matched (3)
635	2012	737783	2721000000	2389000000	30365617	3626000000	945700000	2680000000	英力特	1996-11-20	宁夏回族自治区	石嘴山市	惠农区	2	2	C26	化学原料及化学制品制造业	0.0083745	0.26082	22.0114	16	1.13876	-0.028492	10100000	0.003711	3	0	-3.79195	343	英力特	62.43	B	9.64	8.65	11	24	9.14	1		master only (1)
635	2013	3078991	2740000000	2342000000	77011965	3552000000	807700000	2744000000	英力特	1996-11-20	宁夏回族自治区	石嘴山市	惠农区	2	2	C26	化学原料及化学制品制造业	0.021683	0.227402	21.9907	17	1.17009	0.0070807	20900000	0.0076439	3	0	-3.83126	527	英力特	57.72	C	13.28	8.6	11	20	4.84	1	1220000	matched (3)
635	2014	3769599	1933000000	1606000000	52294512	3097000000	329200000	2768000000	英力特	1996-11-20	宁夏回族自治区	石嘴山市	惠农区	2	2	C26	化学原料及化学制品制造业	0.0168848	0.106284	21.8538	18	1.20351	-0.294642	9824172	0.0050833	3	0	-3.86581	121	英力特	53.61	C	11.31	11.3	12	14	5	1	750000	matched (3)
635	2015	3769589	1696000000	1454000000	29709184	3144000000	350600000	2793000000	英力特	1996-11-20	宁夏回族自治区	石嘴山市	惠农区	2	2	C26	化学原料及化学制品制造业	0.00945	0.111514	21.8687	19	1.16613	-0.122541	11700000	0.0069194	3	0	-3.90648	149	英力特	63.59	B	10.42	9.28	12	27	4.89	1	163333	matched (3)
635	2016	5702343	1596000000	1271000000	109800000	3330000000	435000000	2895000000	英力特	1996-11-20	宁夏回族自治区	石嘴山市	惠农区	2	2	C26	化学原料及化学制品制造业	0.0329703	0.130624	21.9263	20	1.25531	-0.0588303	23900000	0.0149547	3	0	-3.9489	99	英力特	70.28	B	12.36	11.31	15	27	4.61	1	167333	matched (3)
635	2017	7404523	1965000000	1608000000	93312954	3444000000	458700000	2986000000	英力特	1996-11-20	宁夏回族自治区	石嘴山市	惠农区	2	2	C26	化学原料及化学制品制造业	0.0270931	0.13317	21.9599	21	1.22221	0.231282	7027821	0.0035762	3	0	-3.99018	2811	英力特	16.16	D	10.83	0.33	0	0	5	1	170250	matched (3)
637	2010	0	3589000000	3366000000	89197971	833500000	9.02466e+06	824500000	茂化实华	1996-11-14	广东省	茂名市	茂南区			C25	石油加工、炼焦及核燃料加工业	0.107014	0.0108272	20.5412	14	1.06629		1150000	0.0003204	1	1	-3.57173	1533	茂化实华	19.49	D	13.11	4	0	0	2.38	0		master only (1)
637	2011	0	4139000000	4024000000	7.39131e+06	728600000	5.15857e+06	723500000	茂化实华	1996-11-14	广东省	茂名市	茂南区			C25	石油加工、炼焦及核燃料加工业	0.0101442	0.0070799	20.4067	15	1.02867	0.153176	496062	0.0001198	1	1	-3.58962	2297	茂化实华	13.73	D	7.46	1.27	0	0	5	0		master only (1)
637	2012	0	3538000000	3386000000	39501929	941300000	120200000	821100000	茂化实华	1996-11-14	广东省	茂名市	茂南区			C25	石油加工、炼焦及核燃料加工业	0.0419663	0.127677	20.6627	16	1.04485	-0.145224	299617	8.47e-05	1	1	-3.67037	2527	茂化实华	12.33	D	7.34	1.54	0	0	3.45	0		master only (1)
637	2013	0	3245000000	3013000000	71681548	1040000000	176800000	863000000	茂化实华	1996-11-14	广东省	茂名市	茂南区			C25	石油加工、炼焦及核燃料加工业	0.0689372	0.169992	20.7623	17	1.07668	-0.0829978	690650	0.0002129	1	1	-3.7247	2609	茂化实华	15.14	D	9.24	1.46	0	0	4.44	0		master only (1)
637	2014	0	4015000000	3689000000	112500000	1212000000	317000000	895300000	茂化实华	1996-11-14	广东省	茂名市	茂南区			C25	石油加工、炼焦及核燃料加工业	0.0927601	0.261497	20.9158	18	1.08824	0.237383	632650	0.0001576	1	1	-3.78511	2579	茂化实华	16.67	D	11.12	1.46	0	0	4.09	0		master only (1)
637	2015	0	3067000000	2716000000	135300000	1272000000	326600000	945200000	茂化实华	1996-11-14	广东省	茂名市	茂南区			C25	石油加工、炼焦及核燃料加工业	0.106357	0.256789	20.9637	19	1.12918	-0.236063	612650	0.0001998	1	1	-3.83106	1099	茂化实华	24.43	D	19.52	1.29	0	0	3.62	0		master only (1)
637	2016	0	2960000000	2696000000	73585112	1280000000	338000000	941800000	茂化实华	1996-11-14	广东省	茂名市	茂南区			C25	石油加工、炼焦及核燃料加工业	0.0574955	0.26409	20.97	20	1.09788	-0.0347975	5724317	0.0019337	1	1	-3.87183	1566	茂化实华	23.42	D	17.26	1.36	0	0	4.8	0		master only (1)
637	2017	0	4408000000	4133000000	117800000	1209000000	219200000	989900000	茂化实华	1996-11-14	广东省	茂名市	茂南区			C25	石油加工、炼焦及核燃料加工业	0.0974273	0.181275	20.9131	21	1.06636	0.488957	1317984	0.000299	1	1	-3.90477	970	茂化实华	26.01	D	19.31	3.11	0	0	3.59	0	194750	matched (3)
655	2010	133000000	1540000000	729000000	491300000	2439000000	277700000	2162000000	金岭矿业	1996-11-28	山东省	淄博市	张店区	1	2	B08	黑色金属矿采选业	0.201396	0.113821	21.615	14	2.11313		400000	0.0002597	1	1	-3.69245	213	金岭矿业	57.77	C	19.65	9	7	15	7.12	1		master only (1)
655	2011	156000000	1784000000	880200000	497500000	2934000000	333400000	2600000000	金岭矿业	1996-11-28	山东省	淄博市	张店区	1	2	B08	黑色金属矿采选业	0.169579	0.11365	21.7995	15	2.0268	0.158148	0	0	1	1	-3.74321	318	金岭矿业	58.96	C	17.64	9.09	11	14	7.23	1		master only (1)
655	2012	156000000	1318000000	828800000	211100000	3336000000	522800000	2813000000	金岭矿业	1996-11-28	山东省	淄博市	张店区	1	2	B08	黑色金属矿采选业	0.0632926	0.15671	21.928	16	1.58973	-0.261487	4000	3.04e-06	1	1	-3.78897	432	金岭矿业	59.35	C	14.71	9.39	11	20	4.25	1		master only (1)
655	2013	159000000	1637000000	1015000000	263900000	3595000000	560200000	3035000000	金岭矿业	1996-11-28	山东省	淄博市	张店区	1	2	B08	黑色金属矿采选业	0.0734077	0.155839	22.0028	17	1.61259	0.242661	500000	0.0003054	1	1	-3.83167	293	金岭矿业	67.23	B	21.33	9.53	12	20	4.37	1		master only (1)
655	2014	346000000	1540000000	1033000000	215100000	3667000000	474700000	3193000000	金岭矿业	1996-11-28	山东省	淄博市	张店区	1	2	B08	黑色金属矿采选业	0.0586419	0.129441	22.0227	18	1.49054	-0.0595122	0	0	1	1	-3.87231	2347	金岭矿业	17.74	D	12.85	1.28	0	0	3.61	1		master only (1)
655	2015	346000000	786400000	702100000	5.24773e+06	3430000000	235400000	3195000000	金岭矿业	1996-11-28	山东省	淄博市	张店区	1	2	B08	黑色金属矿采选业	0.0015299	0.0686192	21.9558	19	1.12003	-0.489271	8076673	0.0102702	1	1	-3.91003	3185	金岭矿业	9.38	D	6.51	1.18	0	0	1.69	1	68750	matched (3)
655	2016	347000000	625900000	584000000	-569500000	3003000000	377200000	2625000000	金岭矿业	1996-11-28	山东省	淄博市	张店区	1	2	B08	黑色金属矿采选业	-0.189673	0.125634	21.8228	20	1.0717	-0.20408	2451555	0.0039167	1	1	-3.94435	609	金岭矿业	33.64	D	-1.19	6.19	12	15.5	1.14	1	0	matched (3)
655	2017	348000000	1044000000	684300000	-320200000	2658000000	351900000	2307000000	金岭矿业	1996-11-28	山东省	淄博市	张店区	1	2	B08	黑色金属矿采选业	-0.120466	0.13236	21.701	21	1.5253	0.667653	1418270	0.0013587	1	1	-3.97783	3497	金岭矿业	-0.86	E	-1.18	1.26	0	0	-0.94	1		master only (1)
657	2010	3825852	1158000000	1092000000	7.65653e+06	374800000	46537927	328300000	中钨高新	1996-12-05	海南省	海口市	龙华区			C32	有色金属冶炼和压延加工业	0.020426	0.124153	19.742	14	1.05976		0	0	1	1	-3.41753	2214	中钨高新	10.41	D	9.2	0.39	0	0	0.82	1		master only (1)
657	2011	3976280	1449000000	1379000000	4.62215e+06	393400000	60496174	332900000	中钨高新	1996-12-05	海南省	海口市	龙华区			C32	有色金属冶炼和压延加工业	0.0117485	0.153769	19.7904	15	1.05098	0.251452	0	0	1	1	-3.46842	2468	中钨高新	8.38	D	6.28	0.32	0	0	1.78	1		master only (1)
657	2012	4373896	1596000000	1567000000	-51144512	370200000	88294868	281900000	中钨高新	1996-12-05	海南省	海口市	龙华区			C32	有色金属冶炼和压延加工业	-0.138166	0.238527	19.7295	16	1.01824	0.101344	0	0	1	1	-3.49467	2772	中钨高新	0.55	D	0.1	0.49	0	0	-0.04	1		master only (1)
657	2013	76800000	11240000000	9976000000	203200000	9619000000	5695000000	3924000000	中钨高新	1996-12-05	海南省	海口市	龙华区			C32	有色金属冶炼和压延加工业	0.0211303	0.592067	22.987	17	1.12646	6.04254	99900000	0.0088878	1	1	-3.82239	2851	中钨高新	11.29	D	9.48	0.24	0	0	1.57	1	1200000	matched (3)
657	2014	134000000	8380000000	7454000000	46741695	7818000000	3897000000	3921000000	中钨高新	1996-12-05	海南省	海口市	龙华区			C32	有色金属冶炼和压延加工业	0.0059786	0.498505	22.7797	18	1.12413	-0.254288	132000000	0.0158107	1	1	-3.87127	3026	中钨高新	12.67	D	7.25	0.42	0	0	5	1	0	matched (3)
657	2015	167000000	5857000000	5212000000	-528100000	6830000000	3370000000	3460000000	中钨高新	1996-12-05	海南省	海口市	龙华区			C32	有色金属冶炼和压延加工业	-0.0773242	0.49342	22.6446	19	1.12373	-0.301009	46300000	0.0079117	1	1	-3.91507	3489	中钨高新	-0.61	E	-1.15	0.47	0	0	0.07	1		master only (1)
657	2016	184000000	5342000000	4254000000	56832970	6880000000	3291000000	3589000000	中钨高新	1996-12-05	海南省	海口市	龙华区			C32	有色金属冶炼和压延加工业	0.0082604	0.478328	22.6519	20	1.2559	-0.0879279	58300000	0.0109101	1	1	-3.9549	3228	中钨高新	11.92	D	6.46	0.46	0	0	5	1		master only (1)
657	2017	192000000	6709000000	5325000000	189400000	7416000000	3666000000	3750000000	中钨高新	1996-12-05	海南省	海口市	龙华区			C32	有色金属冶炼和压延加工业	0.0255429	0.494335	22.727	21	1.25988	0.255864	38900000	0.0058053	1	1	-3.99294	3168	中钨高新	12.06	D	8.43	0.89	0	0	2.74	1		master only (1)
659	2010	28400000	3348000000	2580000000	206300000	5955000000	2991000000	2963000000	珠海中富	1996-12-03	广东省	珠海市	珠海市			C29	橡胶和塑料制品业	0.0346429	0.502319	22.5074	14	1.29755		3804005	0.0011363	1	1	-3.71732	1569	珠海中富	19.33	D	11.37	4	0	0	3.96	0		master only (1)
659	2011	35400000	3611000000	2926000000	73136059	5964000000	3013000000	2950000000	珠海中富	1996-12-03	广东省	珠海市	珠海市			C29	橡胶和塑料制品业	0.0122632	0.505273	22.509	15	1.23408	0.0786884	4862370	0.0013465	1	1	-3.7573	1771	珠海中富	19.18	D	10.18	4	0	0	5	0		master only (1)
659	2012	35500000	3114000000	2671000000	-203600000	5943000000	3279000000	2664000000	珠海中富	1996-12-03	广东省	珠海市	珠海市			C29	橡胶和塑料制品业	-0.0342555	0.551759	22.5055	16	1.16551	-0.137776	7844057	0.0025193	1	1	-3.79734	2738	珠海中富	2.5	D	3.5	4	0	0	-5	0		master only (1)
659	2013	33700000	2796000000	2441000000	-1187000000	4554000000	3432000000	1122000000	珠海中富	1996-12-03	广东省	珠海市	珠海市			C29	橡胶和塑料制品业	-0.2606	0.753524	22.2393	17	1.14531	-0.102122	4551510	0.0016281	1	1	-3.83704	3056	珠海中富	0.71	D	-2.78	4	0	0	-0.51	0		master only (1)
659	2014	38200000	2371000000	1934000000	37520356	3720000000	2592000000	1128000000	珠海中富	1996-12-03	广东省	珠海市	珠海市			C29	橡胶和塑料制品业	0.0100851	0.696732	22.0371	18	1.2257	-0.151957	4546229	0.0019176	1	1	-3.87275	2834	珠海中富	14.77	D	6.99	2.78	0	0	5	0		master only (1)
659	2015	42000000	1875000000	1524000000	-71664890	3175000000	2124000000	1051000000	珠海中富	1996-12-03	广东省	珠海市	珠海市			C29	橡胶和塑料制品业	-0.0225698	0.668914	21.8787	19	1.2304	-0.209139	1824553	0.0009731	1	1	-3.90692	3579	珠海中富	-9.08	E	-5.97	1.89	0	0	-5	0		master only (1)
659	2016	42000000	1620000000	1365000000	-588300000	2617000000	2148000000	469600000	珠海中富	1996-12-03	广东省	珠海市	珠海市			C29	橡胶和塑料制品业	-0.224782	0.820605	21.6854	20	1.18667	-0.136222	1301808	0.0008038	1	1	-3.9369	3475	珠海中富	0.93	D	-2.59	4	0	0	-0.48	0		master only (1)
659	2017	42000000	1615000000	1271000000	90920165	2647000000	2060000000	587300000	珠海中富	1996-12-03	广东省	珠海市	珠海市			C29	橡胶和塑料制品业	0.034348	0.778131	21.6967	21	1.27013	-0.0029139	26500000	0.0164052	1	1	-3.97757	3233	珠海中富	10.32	D	2.52	2.8	0	0	5	0		master only (1)
672	2010	0	20547161	19088502	4.63607e+06	94750740	72512802	22237938	上峰水泥	1996-12-18	甘肃省	白银市	白银区			C30	非金属矿物制品业	0.0489291	0.765301	18.3668	14	1.07642		0	0	3	0	-3.02357	2175	上峰水泥	11.92	D	8.92	3	0	0	0	0		master only (1)
672	2011	0	20278110	17765315	3.12115e+06	96378525	71019435	25359090	上峰水泥	1996-12-18	甘肃省	白银市	白银区			C30	非金属矿物制品业	0.0323843	0.73688	18.3838	15	1.14144	-0.0130943	0	0	3	0	-3.06945	2462	上峰水泥	8.79	D	5.79	3	0	0	0	0		master only (1)
672	2012	0	74011130	62028129	913564	96521309	70248655	26272654	上峰水泥	1996-12-18	甘肃省	白银市	白银区			C30	非金属矿物制品业	0.0094649	0.727805	18.3853	16	1.19319	2.6498	0	0	3	0	-3.10996	2619	上峰水泥	9.03	D	6.16	2.87	0	0	0	0		master only (1)
672	2013	173000000	2544000000	1929000000	260700000	3311000000	1839000000	1472000000	上峰水泥	1996-12-18	甘肃省	白银市	白银区			C30	非金属矿物制品业	0.0787271	0.555556	21.9205	17	1.319	33.3695	44300000	0.0174112	3	0	-3.82867	1245	上峰水泥	24.14	D	14.12	0.96	0	0	9.06	0		master only (1)
672	2014	194000000	2737000000	1939000000	369400000	3850000000	2074000000	1776000000	上峰水泥	1996-12-18	甘肃省	白银市	白银区			C30	非金属矿物制品业	0.0959488	0.538752	22.0714	18	1.41162	0.075839	45100000	0.0164842	3	0	-3.87372	285	上峰水泥	31.6	D	21.62	0.76	0	0	9.22	0		master only (1)
672	2015	490000000	2026000000	1687000000	60073709	4678000000	2813000000	1865000000	上峰水泥	1996-12-18	甘肃省	白银市	白银区			C30	非金属矿物制品业	0.0128416	0.601407	22.2661	19	1.20067	-0.259843	73700000	0.0363794	3	0	-3.91735	238	上峰水泥	53.9	C	11.49	6.41	17	9	10	0	1000000	matched (3)
672	2016	540000000	2916000000	2326000000	139000000	5813000000	4210000000	1603000000	上峰水泥	1996-12-18	甘肃省	白银市	白银区			C30	非金属矿物制品业	0.0239199	0.724193	22.4834	20	1.25386	0.439645	35800000	0.0122894	3	0	-3.95755	307	上峰水泥	60.88	B	12.89	7.27	18	13	9.72	0	400000	matched (3)
672	2017	575000000	4588000000	2996000000	767800000	5988000000	3637000000	2351000000	上峰水泥	1996-12-18	甘肃省	白银市	白银区			C30	非金属矿物制品业	0.128234	0.607326	22.513	21	1.53111	0.573193	44600000	0.0097134	3	0	-3.99726	329	上峰水泥	30.19	D	19.2	0.99	0	0	10	0	1232000	matched (3)
677	2010	111000000	4720000000	4697000000	-445900000	7577000000	7242000000	334700000	恒天海龙	1996-12-26	山东省	潍坊市	寒亭区			C28	化学纤维制造业	-0.0588501	0.955831	22.7484	14	1.00502		77900000	0.0164943	1	1	-3.71229	2293	恒天海龙	5.71	D	1.54	1.47	0	0	2.7	1	1216000	matched (3)
677	2011	111000000	3813000000	3956000000	-1139000000	5896000000	6700000000	-804300000	恒天海龙	1996-12-26	山东省	潍坊市	寒亭区			C28	化学纤维制造业	-0.193188	1.13642	22.4975	15	0.964006	-0.192127	17700000	0.0046345	1	1	-3.75742	2659	恒天海龙	-8.7	E	-9.93	1.35	0	0	-0.12	1	4021000	matched (3)
677	2012	43000000	1060000000	1211000000	1013000000	3642000000	2906000000	736500000	恒天海龙	1996-12-26	山东省	潍坊市	寒亭区			C28	化学纤维制造业	0.278179	0.797791	22.0158	16	0.875267	-0.722024	9579309	0.0090366	1	1	-3.79209	2520	恒天海龙	12.46	D	10.49	0.56	0	0	1.41	1	1028000	matched (3)
677	2013	48900000	2359000000	2371000000	-301500000	3328000000	2806000000	521600000	恒天海龙	1996-12-26	山东省	潍坊市	寒亭区			C28	化学纤维制造业	-0.0906051	0.843264	21.9257	17	0.994911	1.22558	12800000	0.0054278	1	1	-3.82888	3095	恒天海龙	-1.29	E	-1.75	0.73	0	0	-0.27	1	0	matched (3)
677	2014	48900000	1803000000	1831000000	-429600000	3013000000	2445000000	568100000	恒天海龙	1996-12-26	山东省	潍坊市	寒亭区			C28	化学纤维制造业	-0.142594	0.811452	21.8261	18	0.98487	-0.235592	2678000	0.0014849	1	1	-3.86452	3462	恒天海龙	-1.97	E	-2.79	0.9	0	0	-0.08	1	28000	matched (3)
677	2015	5890100	2071000000	2031000000	58802482	827600000	200700000	626900000	恒天海龙	1996-12-26	山东省	潍坊市	寒亭区			C28	化学纤维制造业	0.0710553	0.242511	20.534	19	1.01962	0.148106	19200000	0.0092548	1	1	-3.77059	3188	恒天海龙	9.21	D	7.52	0.27	0	0	1.42	0	17400000	matched (3)
677	2016	5890100	486100000	411300000	16265933	844400000	201300000	643100000	恒天海龙	1996-12-26	山东省	潍坊市	寒亭区			C28	化学纤维制造业	0.0192636	0.238342	20.5541	20	1.18196	-0.765229	1352379	0.0027821	1	1	-3.81377	3351	恒天海龙	7.13	D	6.26	1.97	0	0	-1.1	0	0	matched (3)
677	2017	5890100	554300000	487300000	7.73285e+06	844800000	193900000	650900000	恒天海龙	1996-12-26	山东省	潍坊市	寒亭区			C28	化学纤维制造业	0.009154	0.229517	20.5545	21	1.13758	0.140321	1679714	0.0030303	1	1	-3.85384	3126	恒天海龙	12.88	D	5.75	2.13	0	0	5	0		master only (1)
683	2010	20800000	2333000000	1710000000	182200000	5671000000	2666000000	3006000000	远兴能源	1997-01-31	内蒙古自治区	鄂尔多斯市	东胜区	1	2	C26	化学原料及化学制品制造业	0.0321243	0.470051	22.4587	13	1.36458		5627823	0.0024119	3	0	-3.67773	1612	远兴能源	19.13	D	11.64	4	0	0	3.49	0		master only (1)
683	2011	20800000	3135000000	1945000000	382900000	6013000000	2743000000	3271000000	远兴能源	1997-01-31	内蒙古自治区	鄂尔多斯市	东胜区	1	2	C26	化学原料及化学制品制造业	0.0636817	0.456107	22.5173	14	1.61189	0.34362	20700000	0.0065955	3	0	-3.71721	1215	远兴能源	23.31	D	14.31	4	0	0	5	0		master only (1)
683	2012	22600000	3662000000	2257000000	296900000	9966000000	5767000000	4200000000	远兴能源	1997-01-31	内蒙古自治区	鄂尔多斯市	东胜区	1	2	C26	化学原料及化学制品制造业	0.0297943	0.578615	23.0224	15	1.6224	0.168142	17400000	0.0047639	3	0	-3.7405	1782	远兴能源	20.09	D	12.49	4	0	0	3.6	0		master only (1)
683	2013	23800000	3399000000	2509000000	40623995	11760000000	7568000000	4187000000	远兴能源	1997-01-31	内蒙古自治区	鄂尔多斯市	东胜区	1	2	C26	化学原料及化学制品制造业	0.0034557	0.643807	23.1876	16	1.35504	-0.0718011	11200000	0.0033066	3	0	-3.77028	2548	远兴能源	15.72	D	7.15	3.57	0	0	5	0		master only (1)
683	2014	487000000	7200000000	5028000000	276700000	19530000000	10980000000	8549000000	远兴能源	1997-01-31	内蒙古自治区	鄂尔多斯市	东胜区	1	2	C26	化学原料及化学制品制造业	0.0141679	0.562241	23.6952	17	1.43198	1.11797	10300000	0.0014371	3	0	-3.76417	1996	远兴能源	19.16	D	10.16	4	0	0	5	0	800000	matched (3)
683	2015	489000000	7318000000	5157000000	104700000	19380000000	11120000000	8263000000	远兴能源	1997-01-31	内蒙古自治区	鄂尔多斯市	东胜区	1	2	C26	化学原料及化学制品制造业	0.0054033	0.57365	23.6876	18	1.41915	0.0164403	16900000	0.0023028	3	0	-3.80503	2609	远兴能源	17.02	D	8.43	3.59	0	0	5	0	0	matched (3)
683	2016	489000000	9136000000	7362000000	-633600000	22230000000	12470000000	9759000000	远兴能源	1997-01-31	内蒙古自治区	鄂尔多斯市	东胜区	1	2	C26	化学原料及化学制品制造业	-0.0284977	0.56106	23.8249	19	1.24096	0.248405	11100000	0.0012197	3	0	-3.82885	3420	远兴能源	3.83	D	3.9	4	0	0	-4.07	0	120000	matched (3)
683	2017	489000000	10300000000	7151000000	939400000	22040000000	11510000000	10530000000	远兴能源	1997-01-31	内蒙古自治区	鄂尔多斯市	东胜区	1	2	C26	化学原料及化学制品制造业	0.0426256	0.522167	23.8161	20	1.44098	0.127847	18600000	0.0018082	3	0	-3.86993	2279	远兴能源	19.61	D	12.39	3.71	0	0	3.51	0	0	matched (3)
688	2010	122300			-21730712	2.56787e+06	76259432	-73691566	国城矿业	1997-01-20	重庆市	重庆市	涪陵区			B09	有色金属矿采选业	-8.46256	29.6976	14.7586	13			0		3	0	-1.1768	2273	国城矿业	7.59	D	4.36	3.23	0	0	0	0		master only (1)
688	2011	124180	14057842	13675214	1.88558e+06	25938877	97744859	-71805982	国城矿业	1997-01-20	重庆市	重庆市	涪陵区			B09	有色金属矿采选业	0.0726933	3.76828	17.0712	14	1.02798		10000000	0.711347	3	0	-2.50369	2481	国城矿业	7.75	D	3.75	4	0	0	0	0		master only (1)
688	2012	124180	17908634	17346864	-18890248	9.98612e+06	100700000	-90696230	国城矿业	1997-01-20	重庆市	重庆市	涪陵区			B09	有色金属矿采选业	-1.89165	10.0822	16.1167	15	1.03239	0.273925	0	0	3	0	-2.06827	2721	国城矿业	3.39	D	-0.61	4	0	0	0	0		master only (1)
688	2013	79200000	669700000	265900000	282300000	1144000000	172400000	971200000	国城矿业	1997-01-20	重庆市	重庆市	涪陵区			B09	有色金属矿采选业	0.246819	0.150741	20.8574	16	2.51861	36.3948	190000	0.0002837	3	0	-3.69758	1181	国城矿业	24.66	D	14.66	1.25	0	0	8.75	0	180000	matched (3)
688	2014	79200000	986900000	504300000	322600000	1643000000	436500000	1206000000	国城矿业	1997-01-20	重庆市	重庆市	涪陵区			B09	有色金属矿采选业	0.196396	0.265747	21.2196	17	1.95706	0.473701	54969	5.57e-05	3	0	-3.77953	1036	国城矿业	24.05	D	14.03	1.12	0	0	8.9	0	0	matched (3)
688	2015	79200000	1091000000	589100000	288000000	1922000000	427600000	1494000000	国城矿业	1997-01-20	重庆市	重庆市	涪陵区			B09	有色金属矿采选业	0.149832	0.222466	21.3766	18	1.85141	0.105105	19539	1.79e-05	3	0	-3.83421	992	国城矿业	25.12	D	14.16	1.21	0	0	9.75	0		master only (1)
688	2016	79200000	1114000000	645900000	232700000	1957000000	185300000	1772000000	国城矿业	1997-01-20	重庆市	重庆市	涪陵区			B09	有色金属矿采选业	0.11892	0.0946737	21.3948	19	1.72521	0.0216941	10000	8.97e-06	3	0	-3.87577	1177	国城矿业	25.88	D	14.64	1.37	0	0	9.87	0		master only (1)
688	2017	79400000	1240000000	524500000	410500000	2377000000	185100000	2192000000	国城矿业	1997-01-20	重庆市	重庆市	涪陵区			B09	有色金属矿采选业	0.17269	0.077885	21.5891	20	2.36497	0.113199	289600	0.0002335	3	0	-3.9307	214	国城矿业	31.57	D	20.21	1.33	0	0	10.03	0		master only (1)
690	2010	111111	3079000000	2412000000	330600000	7371000000	4183000000	3189000000	宝新能源	1997-01-28	广东省	梅州市	梅县区	1	2	D44	电力、热力生产和供应业	0.044846	0.567412	22.7209	13	1.27623		440000	0.0001429	1	1	-3.67312	238	宝新能源	56.97	C	13.83	8.97	17	9	8.17	0		master only (1)
690	2011	111111	3515000000	2881000000	170000000	8119000000	4812000000	3307000000	宝新能源	1997-01-28	广东省	梅州市	梅县区	1	2	D44	电力、热力生产和供应业	0.0209408	0.5927	22.8175	14	1.22014	0.141827	855000	0.0002432	1	1	-3.70993	91	宝新能源	70.81	B	16.85	4.5	18	13	18.46	0		master only (1)
690	2012	1998711	3951000000	2965000000	451300000	9533000000	5701000000	3831000000	宝新能源	1997-01-28	广东省	梅州市	梅县区	1	2	D44	电力、热力生产和供应业	0.047343	0.59808	22.978	15	1.33258	0.123921	1443000	0.0003652	1	1	-3.74285	362	宝新能源	61.51	B	21.27	5.5	16	9	9.74	0		master only (1)
690	2013	1998711	5656000000	3692000000	1107000000	9824000000	5238000000	4586000000	宝新能源	1997-01-28	广东省	梅州市	梅县区	1	2	D44	电力、热力生产和供应业	0.112719	0.533225	23.0081	16	1.5318	0.431515	420000	7.43e-05	1	1	-3.78128	367	宝新能源	64.53	B	24.73	5.5	13	13	8.3	0	52000	matched (3)
690	2014	1998711	4697000000	3091000000	1021000000	9556000000	4542000000	5014000000	宝新能源	1997-01-28	广东省	梅州市	梅县区	1	2	D44	电力、热力生产和供应业	0.106898	0.475295	22.9804	17	1.51958	-0.169473	828000	0.0001763	1	1	-3.82273	6	宝新能源	79.72	B	24.17	5.5	18	15	17.05	0	0	matched (3)
690	2015	1998711	3574000000	2315000000	644300000	9702000000	4643000000	5058000000	宝新能源	1997-01-28	广东省	梅州市	梅县区	1	2	D44	电力、热力生产和供应业	0.0664138	0.478615	22.9956	18	1.54404	-0.239082	228000	6.38e-05	1	1	-3.86194	426	宝新能源	31.4	D	22.4	0	0	0	9	0		master only (1)
690	2016	39400000	3540000000	2253000000	674500000	15750000000	7507000000	8239000000	宝新能源	1997-01-28	广东省	梅州市	梅县区	1	2	D44	电力、热力生产和供应业	0.042841	0.476761	23.4798	19	1.57094	-0.0095865	228000	6.44e-05	1	1	-3.86645	18	宝新能源	78.89	B	18.91	7.52	20	15	17.46	0		master only (1)
690	2017	47000000	2515000000	1879000000	103100000	17390000000	8903000000	8486000000	宝新能源	1997-01-28	广东省	梅州市	梅县区	1	2	D44	电力、热力生产和供应业	0.0059303	0.512	23.5791	20	1.33837	-0.289554	3608397	0.0014348	1	1	-3.89667	3271	宝新能源	9.02	D	10.71	0.04	0	0	-1.73	0		master only (1)
692	2010	3518739	1291000000	1131000000	30736964	2782000000	1614000000	1168000000	惠天热电	1997-02-27	辽宁省	沈阳市	沈河区			D44	电力、热力生产和供应业	0.0110472	0.580252	21.7466	13	1.14184		6178572	0.0047846	1	1	-3.66042	1259	惠天热电	20.99	D	10.18	0.82	0	0	9.99	1	360857	matched (3)
692	2011	4215538	1346000000	1151000000	43000284	3520000000	2285000000	1236000000	惠天热电	1997-02-27	辽宁省	沈阳市	沈河区			D44	电力、热力生产和供应业	0.0122145	0.648965	21.9819	14	1.16925	0.0422813	5502286	0.004088	1	1	-3.71096	2011	惠天热电	17.53	D	8.31	0.36	0	0	8.86	1	2245143	matched (3)
692	2012	4520440	1508000000	1357000000	29408362	3310000000	2059000000	1251000000	惠天热电	1997-02-27	辽宁省	沈阳市	沈河区			D44	电力、热力生产和供应业	0.0088851	0.622123	21.9202	15	1.11115	0.120052	37400000	0.0247797	1	1	-3.74866	2122	惠天热电	17.84	D	7.78	0.06	0	0	10	1	4890857	matched (3)
692	2013	5271696	1558000000	1385000000	19891641	3679000000	2408000000	1271000000	惠天热电	1997-02-27	辽宁省	沈阳市	沈河区			D44	电力、热力生产和供应业	0.0054069	0.654453	22.0259	16	1.12543	0.0336105	25500000	0.0163783	1	1	-3.79241	1414	惠天热电	22.85	D	12.8	0.05	0	0	10	1	2229740	matched (3)
692	2014	5914893	1573000000	1350000000	47116120	3793000000	2500000000	1294000000	惠天热电	1997-02-27	辽宁省	沈阳市	沈河区			D44	电力、热力生产和供应业	0.0124208	0.658962	22.0565	17	1.16523	0.0096295	19700000	0.0125273	1	1	-3.83331	2373	惠天热电	17.65	D	7.61	0.04	0	0	10	1	188702	matched (3)
692	2015	6963112	1569000000	1315000000	79757512	4279000000	2879000000	1400000000	惠天热电	1997-02-27	辽宁省	沈阳市	沈河区			D44	电力、热力生产和供应业	0.0186403	0.672847	22.1769	18	1.19338	-0.0026757	40600000	0.025901	1	1	-3.87609	2141	惠天热电	19.06	D	9.02	0.04	0	0	10	1	188702	matched (3)
692	2016	7726309	1830000000	1687000000	60597020	4890000000	3451000000	1439000000	惠天热电	1997-02-27	辽宁省	沈阳市	沈河区			D44	电力、热力生产和供应业	0.0123917	0.705711	22.3105	19	1.085	0.166339	169000000	0.0921657	1	1	-3.91772	2340	惠天热电	19.4	D	10.56	0.03	0	0	8.81	1	0	matched (3)
692	2017	8373178	1766000000	1665000000	-56272237	5643000000	4279000000	1364000000	惠天热电	1997-02-27	辽宁省	沈阳市	沈河区			D44	电力、热力生产和供应业	-0.0099719	0.758328	22.4537	20	1.06076	-0.0348498	139000000	0.078782	1	1	-3.95776	3326	惠天热电	6.59	D	3.95	0.03	0	0	2.61	1		master only (1)
693	2010	226190	51513353	75206224	4.91941e+06	244800000	307900000	-63167579	*ST华泽	1997-02-26	四川省	成都市	温江区	1	2	B09	有色金属矿采选业	0.0200983	1.25807	19.3158	13	0.684961		0	0	3	0	-3.27283	2304	*ST华泽	5	D	4.74	0.26	0	0	0	0		master only (1)
693	2011	909400	36809987	58552126	-62769516	191800000	317800000	-125900000	*ST华泽	1997-02-26	四川省	成都市	温江区	1	2	B09	有色金属矿采选业	-0.327189	1.65645	19.0722	14	0.62867	-0.285428	0	0	3	0	-3.24597	2551	*ST华泽	2.88	D	-1.12	4	0	0	0	0		master only (1)
693	2012	0	25058493	42287283	-54306179	159100000	339400000	-180200000	*ST华泽	1997-02-26	四川省	成都市	温江区	1	2	B09	有色金属矿采选业	-0.341273	2.13269	18.8852	15	0.592577	-0.319247	0	0	3	0	-3.23119	2765	*ST华泽	0.74	D	-1.27	2.01	0	0	0	0		master only (1)
693	2013	121000000	4408000000	4152000000	111800000	3411000000	2238000000	1173000000	*ST华泽	1997-02-26	四川省	成都市	温江区	1	2	B09	有色金属矿采选业	0.0327707	0.656135	21.9503	16	1.06162	174.899	5256700	0.0011926	3	0	-3.78982	1380	*ST华泽	23.09	D	11.39	4	0	0	7.7	0	3150000	matched (3)
693	2014	121000000	8049000000	7659000000	212300000	4203000000	2805000000	1398000000	*ST华泽	1997-02-26	四川省	成都市	温江区	1	2	B09	有色金属矿采选业	0.0505045	0.667359	22.159	17	1.05099	0.826131	635866	7.9e-05	3	0	-3.83576	1497	*ST华泽	21.52	D	11.84	1.03	0	0	8.65	0	0	matched (3)
693	2015	121000000	8508000000	8438000000	-155400000	5432000000	4175000000	1257000000	*ST华泽	1997-02-26	四川省	成都市	温江区	1	2	B09	有色金属矿采选业	-0.0286094	0.768633	22.4156	18	1.00829	0.0570205	1900000	0.0002233	3	0	-3.87792	3322	*ST华泽	3.41	D	3.77	0.85	0	0	-1.21	0		master only (1)
693	2016	121000000	2056000000	2091000000	-404200000	3810000000	2957000000	852600000	*ST华泽	1997-02-26	四川省	成都市	温江区	1	2	B09	有色金属矿采选业	-0.106115	0.776203	22.0608	19	0.983613	-0.758298	1630200	0.0007927	3	0	-3.91343	3581	*ST华泽	-9.06	E	-9.78	1.45	0	0	-0.73	0		master only (1)
693	2017	121000000	390900000	389700000	-2288000000	1707000000	3152000000	-1445000000	*ST华泽	1997-02-26	四川省	成都市	温江区	1	2	B09	有色金属矿采选业	-1.34015	1.84631	21.2581	20	1.00295	-0.809935	1600000	0.0040936	3	0	-3.90332	3570	*ST华泽	-6.33	E	-10.33	4	0	0	0	0		master only (1)
695	2010	1786652	673400000	687100000	7429763	1025000000	693700000	331400000	滨海能源	1997-02-18	天津市	天津市	滨海新区			D44	电力、热力生产和供应业	0.0072482	0.676708	20.748	13	0.980084		73000000	0.10837	1	1	-3.56269	1789	滨海能源	17.86	D	7.64	3	0	0	7.22	1		master only (1)
695	2011	1786652	734000000	709800000	6.55282e+06	1267000000	928300000	338800000	滨海能源	1997-02-18	天津市	天津市	滨海新区			D44	电力、热力生产和供应业	0.0051712	0.732609	20.96	14	1.03406	0.0898672	36600000	0.0498397	1	1	-3.63062	2465	滨海能源	8.57	D	-1.78	3	0	0	7.35	1		master only (1)
695	2012	1865524	782900000	749300000	5.24717e+06	1190000000	844800000	345100000	滨海能源	1997-02-18	天津市	天津市	滨海新区			D44	电力、热力生产和供应业	0.0044096	0.709961	20.8972	15	1.0448	0.0666427	33000000	0.0421594	1	1	-3.66274	1939	滨海能源	19.03	D	6.03	3	0	0	10	1		master only (1)
695	2013	1865524	728600000	696300000	3.61313e+06	1155000000	839600000	315300000	滨海能源	1997-02-18	天津市	天津市	滨海新区			D44	电力、热力生产和供应业	0.0031285	0.727013	20.8673	16	1.04632	-0.0693535	32900000	0.045151	1	1	-3.69888	2161	滨海能源	18.5	D	6.03	3	0	0	9.47	1	30000	matched (3)
695	2014	1865524	657600000	628100000	3.36667e+06	1113000000	793700000	319600000	滨海能源	1997-02-18	天津市	天津市	滨海新区			D44	电力、热力生产和供应业	0.003024	0.712942	20.8306	17	1.04701	-0.0973844	33100000	0.0503505	1	1	-3.73403	2000	滨海能源	19.13	D	6.13	3	0	0	10	1	78000	matched (3)
695	2015	1865524	607400000	581800000	3.42711e+06	1116000000	792600000	323800000	滨海能源	1997-02-18	天津市	天津市	滨海新区			D44	电力、热力生产和供应业	0.0030697	0.709932	20.8334	18	1.04408	-0.0763901	33900000	0.055873	1	1	-3.7744	2123	滨海能源	19.14	D	6.14	3	0	0	10	1	0	matched (3)
695	2016	1865524	604600000	600900000	3.8833e+06	1135000000	807100000	327900000	滨海能源	1997-02-18	天津市	天津市	滨海新区			D44	电力、热力生产和供应业	0.0034212	0.711098	20.8499	19	1.00606	-0.0046641	58400000	0.0966027	1	1	-3.8166	2439	滨海能源	18.83	D	5.83	3	0	0	10	1		master only (1)
695	2017	16800000	1007000000	886300000	20717627	1728000000	1240000000	487400000	滨海能源	1997-02-18	天津市	天津市	滨海新区			D44	电力、热力生产和供应业	0.0119913	0.717868	21.2701	20	1.13585	0.665183	2593381	0.0025761	1	1	-3.90448	2240	滨海能源	19.82	D	7.41	2.41	0	0	10	1		master only (1)
698	2010	219000000	7484000000	6517000000	210800000	6873000000	3864000000	3010000000	沈阳化工	1997-02-20	辽宁省	沈阳市	铁西区			C25	石油加工、炼焦及核燃料加工业	0.0306695	0.562133	22.6509	13	1.14839		23700000	0.00317	1	1	-3.67492	2163	沈阳化工	12.29	D	11.51	0.31	0	0	0.47	1		master only (1)
698	2011	219000000	10090000000	9071000000	210800000	6837000000	3616000000	3221000000	沈阳化工	1997-02-20	辽宁省	沈阳市	铁西区			C25	石油加工、炼焦及核燃料加工业	0.0308355	0.52891	22.6456	14	1.11261	0.348488	108000000	0.0107255	1	1	-3.71505	2523	沈阳化工	4.66	D	1.49	0.24	0	0	2.93	1		master only (1)
698	2012	219000000	10260000000	9809000000	-163600000	7017000000	3960000000	3057000000	沈阳化工	1997-02-20	辽宁省	沈阳市	铁西区			C25	石油加工、炼焦及核燃料加工业	-0.023307	0.564337	22.6716	15	1.04604	0.0166919	65100000	0.0063439	1	1	-3.75443	2674	沈阳化工	6.16	D	4.55	0.09	0	0	1.52	1		master only (1)
698	2013	230000000	10530000000	10040000000	30123846	7021000000	3934000000	3087000000	沈阳化工	1997-02-20	辽宁省	沈阳市	铁西区			C25	石油加工、炼焦及核燃料加工业	0.0042906	0.560279	22.6722	16	1.04917	0.0263608	57900000	0.0054956	1	1	-3.79442	2830	沈阳化工	11.85	D	7.27	0.11	0	0	4.47	1		master only (1)
698	2014	240000000	10530000000	10140000000	16486840	7541000000	4437000000	3104000000	沈阳化工	1997-02-20	辽宁省	沈阳市	铁西区			C25	石油加工、炼焦及核燃料加工业	0.0021864	0.588404	22.7436	17	1.03891	0.0003098	52100000	0.0049492	1	1	-3.83244	3097	沈阳化工	11.78	D	6.72	0.06	0	0	5	1		master only (1)
698	2015	276000000	9664000000	9029000000	186000000	9631000000	5758000000	3873000000	沈阳化工	1997-02-20	辽宁省	沈阳市	铁西区			C25	石油加工、炼焦及核燃料加工业	0.0193169	0.597846	22.9882	18	1.07031	-0.0826334	55200000	0.0057149	1	1	-3.86233	3173	沈阳化工	10.21	D	8.9	0.56	0	0	0.75	1		master only (1)
698	2016	276000000	8847000000	7993000000	339100000	10600000000	6386000000	4212000000	沈阳化工	1997-02-20	辽宁省	沈阳市	铁西区			C25	石油加工、炼焦及核燃料加工业	0.0319994	0.602551	23.0839	19	1.10681	-0.0845554	50700000	0.0057356	1	1	-3.89697	2942	沈阳化工	15.68	D	13.17	0.47	0	0	2.04	1		master only (1)
698	2017	276000000	11910000000	10960000000	227900000	9860000000	5473000000	4387000000	沈阳化工	1997-02-20	辽宁省	沈阳市	铁西区			C25	石油加工、炼焦及核燃料加工业	0.0231163	0.555087	23.0117	20	1.08611	0.346047	48800000	0.0040945	1	1	-3.94108	3099	沈阳化工	13.13	D	9.84	0.51	0	0	2.78	1		master only (1)
703	2010	31840.3	223100000	201700000	2.46104e+06	297500000	105800000	191600000	恒逸石化	1997-03-28	广西壮族自治区	北海市	海城区			C28	化学纤维制造业	0.0082738	0.355855	19.5108	13	1.10604		89550	0.0004014	3	0	-3.32266	2309	恒逸石化	4.62	D	8.41	1.21	0	0	-5	0		master only (1)
703	2011	259000000	31510000000	28230000000	2512000000	22420000000	15210000000	7207000000	恒逸石化	1997-03-28	广西壮族自治区	北海市	海城区			C28	化学纤维制造业	0.112039	0.678552	23.8332	14	1.11615	140.241	142000000	0.0045003	3	0	-3.62781	1039	恒逸石化	24.9	D	21.35	1.01	0	0	2.54	0		master only (1)
703	2012	266000000	32670000000	31260000000	453600000	21240000000	14250000000	6987000000	恒逸石化	1997-03-28	广西壮族自治区	北海市	海城区			C28	化学纤维制造业	0.0213536	0.671032	23.7792	15	1.04499	0.0367666	194000000	0.0059442	3	0	-3.67441	2297	恒逸石化	16.31	D	13.54	1.28	0	0	1.49	0		master only (1)
703	2013	267000000	30750000000	29990000000	502100000	23810000000	16430000000	7373000000	恒逸石化	1997-03-28	广西壮族自治区	北海市	海城区			C28	化学纤维制造业	0.0210924	0.690292	23.8932	16	1.02531	-0.0587978	50700000	0.00165	3	0	-3.70019	2549	恒逸石化	15.69	D	13.41	0.72	0	0	1.56	0	324000	matched (3)
703	2014	268000000	28060000000	26900000000	-396500000	26730000000	19720000000	7014000000	恒逸石化	1997-03-28	广西壮族自治区	北海市	海城区			C28	化学纤维制造业	-0.0148306	0.737606	24.0092	17	1.04303	-0.0874151	51100000	0.0018205	3	0	-3.72457	3246	恒逸石化	6.97	D	5.17	0.88	0	0	0.92	0	1565200	matched (3)
703	2015	276000000	30320000000	29000000000	162100000	25210000000	16880000000	8328000000	恒逸石化	1997-03-28	广西壮族自治区	北海市	海城区			C28	化学纤维制造业	0.0064318	0.669643	23.9505	18	1.04559	0.0803621	49900000	0.0016463	3	0	-3.77262	2978	恒逸石化	13.74	D	8.4	0.84	0	0	4.5	0	1500000	matched (3)
703	2016	333000000	32420000000	31310000000	888600000	27530000000	14320000000	13210000000	恒逸石化	1997-03-28	广西壮族自治区	北海市	海城区			C28	化学纤维制造业	0.0322741	0.52011	24.0387	19	1.03553	0.0693203	67200000	0.0020738	3	0	-3.80041	2937	恒逸石化	15.72	D	13.05	0.82	0	0	1.85	0	1842000	matched (3)
703	2017	343000000	65960000000	63340000000	1907000000	35800000000	18140000000	17660000000	恒逸石化	1997-03-28	广西壮族自治区	北海市	海城区			C28	化学纤维制造业	0.05325	0.506781	24.3013	20	1.0414	1.03457	72900000	0.0011052	3	0	-3.8001	2543	恒逸石化	18.11	D	16.04	0.95	0	0	1.12	0		master only (1)
707	2010	286000000	3768000000	3034000000	55571109	7016000000	4725000000	2292000000	*ST双环	1997-04-15	湖北省	孝感市	应城市			C26	化学原料及化学制品制造业	0.0079205	0.673384	22.6715	13	1.24175		6412210	0.0017018	2	0	-3.67444	371	*ST双环	51.59	C	10.9	12.32	12	14	2.37	1	956000	matched (3)
707	2011	287000000	5232000000	3980000000	353200000	8027000000	5960000000	2067000000	*ST双环	1997-04-15	湖北省	孝感市	应城市			C26	化学原料及化学制品制造业	0.0440091	0.742507	22.806	14	1.31448	0.388541	11900000	0.0022738	2	0	-3.71035	1451	*ST双环	21.44	D	17.13	0.55	0	0	3.76	1	1610000	matched (3)
707	2012	221000000	4597000000	3898000000	8.60959e+06	8440000000	6289000000	2150000000	*ST双环	1997-04-15	湖北省	孝感市	应城市			C26	化学原料及化学制品制造业	0.0010201	0.745206	22.8562	15	1.17952	-0.121299	33500000	0.0072839	2	0	-3.74842	2428	*ST双环	14.37	D	9.08	0.29	0	0	5	1	7270000	matched (3)
707	2013	146000000	3722000000	3531000000	-668600000	8965000000	7486000000	1479000000	*ST双环	1997-04-15	湖北省	孝感市	应城市			C26	化学原料及化学制品制造业	-0.0745856	0.835018	22.9166	16	1.05399	-0.19037	33600000	0.0090376	2	0	-3.78582	3101	*ST双环	-1.61	E	-2.03	0.28	0	0	0.14	1	2652900	matched (3)
707	2014	146000000	4001000000	3353000000	3.34963e+06	10050000000	8570000000	1476000000	*ST双环	1997-04-15	湖北省	孝感市	应城市			C26	化学原料及化学制品制造业	0.0003334	0.853113	23.0304	17	1.19312	0.0748349	22600000	0.0056486	2	0	-3.82006	3116	*ST双环	11.45	D	6.14	0.31	0	0	5	1	2340000	matched (3)
707	2015	146000000	3883000000	3241000000	15367301	11080000000	9596000000	1486000000	*ST双环	1997-04-15	湖北省	孝感市	应城市			C26	化学原料及化学制品制造业	0.0013866	0.865886	23.1286	18	1.19789	-0.0294516	39700000	0.0102254	2	0	-3.8542	3398	*ST双环	1.65	D	6.39	0.26	0	0	-5	1	2700000	matched (3)
707	2016	146000000	3971000000	3668000000	-624900000	10600000000	9657000000	943400000	*ST双环	1997-04-15	湖北省	孝感市	应城市			C26	化学原料及化学制品制造业	-0.0589515	0.911002	23.0842	19	1.0826	0.0226234	30600000	0.0076947	2	0	-3.89696	615	*ST双环	33.53	D	-1.19	8.82	12	14	-0.1	1	1670000	matched (3)
707	2017	146000000	4282000000	4207000000	-753600000	9637000000	9174000000	463100000	*ST双环	1997-04-15	湖北省	孝感市	应城市			C26	化学原料及化学制品制造业	-0.0782017	0.951941	22.9889	20	1.01776	0.0783201	27500000	0.0064172	2	0	-3.94229	3542	*ST双环	-2.69	E	-3.17	0.85	0	0	-0.37	1	0	matched (3)
708	2010	0	7893000000	7085000000	561900000	4537000000	1998000000	2539000000	大冶特钢	1997-03-26	湖北省	黄石市	西塞山区	2	2	C31	黑色金属冶炼及压延加工业	0.123843	0.44039	22.2355	13	1.11404		450000	5.7e-05	2	0	-3.67699	1462	大冶特钢	19.84	D	16.29	1.25	0	0	2.3	1		master only (1)
708	2011	0	9262000000	8483000000	584900000	4701000000	1802000000	2899000000	大冶特钢	1997-03-26	湖北省	黄石市	西塞山区	2	2	C31	黑色金属冶炼及压延加工业	0.124417	0.38333	22.2711	14	1.09184	0.17342	34400000	0.003709	2	0	-3.7174	1219	大冶特钢	23.26	D	20.43	0.91	0	0	1.92	1	23000000	matched (3)
708	2012	0	8123000000	7446000000	218200000	4254000000	1317000000	2938000000	大冶特钢	1997-03-26	湖北省	黄石市	西塞山区	2	2	C31	黑色金属冶炼及压延加工业	0.0512957	0.309464	22.1712	15	1.09095	-0.122988	5170000	0.0006365	2	0	-3.75599	2391	大冶特钢	14.99	D	11.37	0.67	0	0	2.95	1	0	matched (3)
708	2013	0	7438000000	6727000000	201700000	4502000000	1362000000	3139000000	大冶特钢	1997-03-26	湖北省	黄石市	西塞山区	2	2	C31	黑色金属冶炼及压延加工业	0.0447964	0.302641	22.2277	16	1.10573	-0.0843342	2280000	0.0003065	2	0	-3.79689	1880	大冶特钢	19.87	D	16.6	0.7	0	0	2.57	1		master only (1)
708	2014	0	7353000000	6579000000	268100000	5028000000	1710000000	3318000000	大冶特钢	1997-03-26	湖北省	黄石市	西塞山区	2	2	C31	黑色金属冶炼及压延加工业	0.0533181	0.340129	22.3382	17	1.11757	-0.0114507	575500	7.83e-05	2	0	-3.83786	1606	大冶特钢	20.99	D	17.61	1.66	0	0	1.72	1		master only (1)
708	2015	0	6197000000	5502000000	270400000	5138000000	1640000000	3498000000	大冶特钢	1997-03-26	湖北省	黄石市	西塞山区	2	2	C31	黑色金属冶炼及压延加工业	0.0526306	0.319129	22.3598	18	1.12636	-0.157138	1789200	0.0002887	2	0	-3.87793	1768	大冶特钢	20.83	D	17.64	0.42	0	0	2.77	1		master only (1)
708	2016	0	6393000000	5586000000	292700000	5847000000	2124000000	3723000000	大冶特钢	1997-03-26	湖北省	黄石市	西塞山区	2	2	C31	黑色金属冶炼及压延加工业	0.0500554	0.363229	22.4892	19	1.14439	0.0315473	3628310	0.0005676	2	0	-3.9175	1907	大冶特钢	21.61	D	18.09	1.03	0	0	2.49	1		master only (1)
708	2017	0	10230000000	9045000000	394900000	6579000000	2550000000	4028000000	大冶特钢	1997-03-26	湖北省	黄石市	西塞山区	2	2	C31	黑色金属冶炼及压延加工业	0.0600268	0.387679	22.6071	20	1.13066	0.599808	6372000	0.0006231	2	0	-3.95584	1569	大冶特钢	23.17	D	19.15	1.47	0	0	2.55	1		master only (1)
709	2010	248000000	116900000000	108600000000	1484000000	104900000000	73960000000	30980000000	河钢股份	1997-04-16	河北省	石家庄市	裕华区			C31	黑色金属冶炼及压延加工业	0.0141444	0.704805	25.3766	13	1.0769		52800000	0.0004514	1	1	-3.29318	313	河钢股份	54.28	C	11.09	9.2	7	25	1.99	1	125000	matched (3)
709	2011	252000000	133300000000	122500000000	1453000000	141000000000	96260000000	44780000000	河钢股份	1997-04-16	河北省	石家庄市	裕华区			C31	黑色金属冶炼及压延加工业	0.0102995	0.682523	25.6723	14	1.08812	0.140479	121000000	0.0009056	1	1	-3.25336	476	河钢股份	50.44	C	12.62	10	7	14	6.82	1	11100000	matched (3)
709	2012	275000000	111600000000	102400000000	138900000	154800000000	110200000000	44570000000	河钢股份	1997-04-16	河北省	石家庄市	裕华区			C31	黑色金属冶炼及压延加工业	0.0008974	0.712048	25.7653	15	1.09007	-0.162842	34000000	0.0003046	1	1	-3.2667	520	河钢股份	55.96	C	10.8	12.16	11	17	5	1	359091	matched (3)
709	2013	308000000	110300000000	100900000000	137100000	166900000000	122100000000	44790000000	河钢股份	1997-04-16	河北省	石家庄市	裕华区			C31	黑色金属冶炼及压延加工业	0.0008216	0.731628	25.8407	16	1.09289	-0.0123157	84300000	0.0007645	1	1	-3.28456	2646	河钢股份	14.76	D	8.6	1.16	0	0	5	1	37500000	matched (3)
709	2014	291000000	98260000000	87550000000	717300000	170400000000	125100000000	45250000000	河钢股份	1997-04-16	河北省	石家庄市	裕华区			C31	黑色金属冶炼及压延加工业	0.0042102	0.734403	25.8612	17	1.12236	-0.108816	70900000	0.0007216	1	1	-3.31842	3030	河钢股份	12.54	D	7.2	1.16	0	0	4.18	1	46300000	matched (3)
709	2015	272000000	73100000000	63370000000	401800000	178800000000	133200000000	45600000000	河钢股份	1997-04-16	河北省	石家庄市	裕华区			C31	黑色金属冶炼及压延加工业	0.0022468	0.745004	25.9096	18	1.15367	-0.256001	23800000	0.0003253	1	1	-3.34386	2783	河钢股份	15.73	D	9.56	1.17	0	0	5	1	2254709	matched (3)
709	2016	280000000	74550000000	64260000000	1430000000	186000000000	139400000000	46630000000	河钢股份	1997-04-16	河北省	石家庄市	裕华区			C31	黑色金属冶炼及压延加工业	0.0076873	0.749285	25.949	19	1.16013	0.0198017	38700000	0.0005196	1	1	-3.37187	164	河钢股份	66.99	B	16.83	12.12	12	20	6.04	1	705434	matched (3)
709	2017	282000000	109000000000	95510000000	2126000000	190100000000	142500000000	47660000000	河钢股份	1997-04-16	河北省	石家庄市	裕华区			C31	黑色金属冶炼及压延加工业	0.0111799	0.749358	25.9711	20	1.14111	0.461859	13100000	0.0001205	1	1	-3.40507	2139	河钢股份	20.31	D	14.22	1.09	0	0	5	1	627787	matched (3)
717	2010	0	18840000000	18040000000	20944952	23100000000	17280000000	5817000000	韶钢松山	1997-05-08	广东省	韶关市	曲江区	1	2	C31	黑色金属冶炼及压延加工业	0.0009067	0.748163	23.8631	13	1.04408		13200000	0.0006999	1	1	-3.58405	402	韶钢松山	50.22	C	9.37	11.98	12	14	2.87	1	10100000	matched (3)
717	2011	0	22870000000	22610000000	-1138000000	24360000000	19680000000	4679000000	韶钢松山	1997-05-08	广东省	韶关市	曲江区	1	2	C31	黑色金属冶炼及压延加工业	-0.0467225	0.807936	23.9163	14	1.01164	0.214397	4773257	0.0002087	1	1	-3.61717	2598	韶钢松山	0.85	D	0.74	1.84	0	0	-1.73	1	58333.3	matched (3)
717	2012	0	19260000000	19920000000	-1952000000	20490000000	17760000000	2730000000	韶钢松山	1997-05-08	广东省	韶关市	曲江区	1	2	C31	黑色金属冶炼及压延加工业	-0.0952556	0.86673	23.7431	15	0.966783	-0.158015	34600000	0.0017967	1	1	-3.67868	2791	韶钢松山	-0.55	E	-2.44	3.21	0	0	-1.32	1	250333	matched (3)
717	2013	311321	19170000000	18520000000	101500000	21650000000	17300000000	4347000000	韶钢松山	1997-05-08	广东省	韶关市	曲江区	1	2	C31	黑色金属冶炼及压延加工业	0.0046875	0.799189	23.7981	16	1.035	-0.0046112	58400000	0.0030457	1	1	-3.71212	2770	韶钢松山	13.12	D	6.25	2.33	0	0	4.54	1	43900000	matched (3)
717	2014	1103774	19500000000	19730000000	-1388000000	18570000000	15630000000	2937000000	韶钢松山	1997-05-08	广东省	韶关市	曲江区	1	2	C31	黑色金属冶炼及压延加工业	-0.0747573	0.841851	23.6448	17	0.987947	0.0169831	20400000	0.0010458	1	1	-3.76974	3411	韶钢松山	0.23	D	-0.75	1.03	0	0	-0.05	1	917833	matched (3)
717	2015	1103774	11140000000	12520000000	-2596000000	16560000000	16210000000	354900000	韶钢松山	1997-05-08	广东省	韶关市	曲江区	1	2	C31	黑色金属冶炼及压延加工业	-0.15673	0.978569	23.5303	18	0.88979	-0.428383	67300000	0.0060412	1	1	-3.82159	3554	韶钢松山	-3.93	E	-3.73	0.45	0	0	-0.65	1	980333	matched (3)
717	2016	1698114	13970000000	13330000000	101400000	14980000000	14520000000	458500000	韶钢松山	1997-05-08	广东省	韶关市	曲江区	1	2	C31	黑色金属冶炼及压延加工业	0.0067729	0.969384	23.4297	19	1.0485	0.253781	196000000	0.0139915	1	1	-3.87106	3331	韶钢松山	8.06	D	7.27	0.79	0	0	0	1	28500000	matched (3)
717	2017	64500000	26040000000	22580000000	2517000000	14420000000	11440000000	2973000000	韶钢松山	1997-05-08	广东省	韶关市	曲江区	1	2	C31	黑色金属冶炼及压延加工业	0.174574	0.793792	23.3916	20	1.15292	0.863488	38600000	0.0014817	1	1	-3.91442	2787	韶钢松山	16.34	D	13.22	3.12	0	0	0	1	2508513	matched (3)
720	2010	13700000	2756000000	2555000000	-32482788	5625000000	4573000000	1052000000	*ST新能	1997-05-09	山东省	泰安市	泰山区			D44	电力、热力生产和供应业	-0.005775	0.812976	22.4504	13	1.07877		99200000	0.0360015	1	1	-3.67778	2359	*ST新能	0.27	D	7.27	3	0	0	-10	1	0	matched (3)
720	2011	13900000	2815000000	2727000000	-209100000	5734000000	4879000000	854800000	*ST新能	1997-05-09	山东省	泰安市	泰山区			D44	电力、热力生产和供应业	-0.0364581	0.850934	22.4697	14	1.03225	0.0214182	62500000	0.0221914	1	1	-3.71765	2593	*ST新能	1.09	D	1.19	3	0	0	-3.1	1		master only (1)
720	2012	18500000	3046000000	2674000000	54893763	5645000000	4763000000	882000000	*ST新能	1997-05-09	山东省	泰安市	泰山区			D44	电力、热力生产和供应业	0.0097245	0.84376	22.454	15	1.13916	0.0818618	12700000	0.0041678	1	1	-3.75776	2412	*ST新能	14.58	D	6.62	3	0	0	4.96	1		master only (1)
720	2013	19300000	2902000000	2455000000	65329810	5530000000	4563000000	967300000	*ST新能	1997-05-09	山东省	泰安市	泰山区			D44	电力、热力生产和供应业	0.0118131	0.825087	22.4335	16	1.18191	-0.0471789	13400000	0.0046048	1	1	-3.79786	2872	*ST新能	10.53	D	6.93	3	0	0	0.6	1	10000	matched (3)
720	2014	21500000	3146000000	2629000000	128900000	5485000000	4359000000	1126000000	*ST新能	1997-05-09	山东省	泰安市	泰山区			D44	电力、热力生产和供应业	0.0235042	0.794783	22.4252	17	1.19653	0.0840003	8836733	0.0028092	1	1	-3.83789	3069	*ST新能	12.13	D	8.33	3	0	0	0.8	1	12500	matched (3)
720	2015	22500000	3293000000	2751000000	135700000	5383000000	4120000000	1262000000	*ST新能	1997-05-09	山东省	泰安市	泰山区			D44	电力、热力生产和供应业	0.0252127	0.765473	22.4064	18	1.19724	0.0468978	13700000	0.0041551	1	1	-3.87794	1642	*ST新能	21.4	D	8.78	3	0	0	9.62	1	250000	matched (3)
720	2016	23600000	2486000000	2175000000	-49718679	5355000000	4153000000	1201000000	*ST新能	1997-05-09	山东省	泰安市	泰山区			D44	电力、热力生产和供应业	-0.0092852	0.775646	22.4012	19	1.14281	-0.245164	12400000	0.0049927	1	1	-3.91795	3548	*ST新能	-2.65	E	4.35	3	0	0	-10	1	232812	matched (3)
720	2017	24800000	2745000000	2558000000	-565200000	9033000000	7609000000	1424000000	*ST新能	1997-05-09	山东省	泰安市	泰山区			D44	电力、热力生产和供应业	-0.0625687	0.842368	22.9242	20	1.07294	0.104107	118000000	0.0431005	1	1	-3.94547	3491	*ST新能	-0.7	E	-1.56	3	0	0	-2.14	1		master only (1)
722	2010	0	587200000	475100000	24962779	1881000000	23200890	1858000000	湖南发展	1997-05-22	湖南省	长沙市	天心区			D44	电力、热力生产和供应业	0.0132704	0.0123337	21.3551	13	1.23595		15200000	0.0258755	2	0	-3.63233	2182	湖南发展	11.63	D	8.32	0	0	0	3.31	1		master only (1)
722	2011	68961.5	188100000	88013385	82895789	1966000000	25237392	1941000000	湖南发展	1997-05-22	湖南省	长沙市	天心区			D44	电力、热力生产和供应业	0.0421641	0.0128368	21.3993	14	2.13723	-0.679637	58822.4	0.0003127	2	0	-3.67616	2347	湖南发展	12.86	D	9.86	3	0	0	0	1		master only (1)
722	2012	175799	257600000	94831692	156400000	2132000000	35006029	2097000000	湖南发展	1997-05-22	湖南省	长沙市	天心区			D44	电力、热力生产和供应业	0.0733479	0.0164179	21.4804	15	2.71644	0.369475	58822.5	0.0002283	2	0	-3.72275	2390	湖南发展	15	D	12	3	0	0	0	1		master only (1)
722	2013	175799	240200000	100700000	157200000	2864000000	589700000	2274000000	湖南发展	1997-05-22	湖南省	长沙市	天心区			D44	电力、热力生产和供应业	0.0549036	0.205886	21.7755	16	2.38561	-0.067621	58822.4	0.0002449	2	0	-3.78197	2709	湖南发展	13.76	D	10.76	3	0	0	0	1		master only (1)
722	2014	175799	271200000	108100000	192800000	3052000000	556800000	2495000000	湖南发展	1997-05-22	湖南省	长沙市	天心区			D44	电力、热力生产和供应业	0.0631725	0.182451	21.8389	17	2.50884	0.129259	68822.5	0.0002537	2	0	-3.82512	2775	湖南发展	15.24	D	12.24	3	0	0	0	1		master only (1)
722	2015	244175	276100000	116200000	127200000	2899000000	201200000	2698000000	湖南发展	1997-05-22	湖南省	长沙市	天心区			D44	电力、热力生产和供应业	0.0438843	0.0693825	21.7877	18	2.37528	0.0179358	58822.5	0.0002131	2	0	-3.8626	1340	湖南发展	23.04	D	11.66	3	0	0	8.38	1		master only (1)
722	2016	323667	281700000	125900000	135300000	3056000000	209500000	2847000000	湖南发展	1997-05-22	湖南省	长沙市	天心区			D44	电力、热力生产和供应业	0.0442664	0.0685451	21.8405	19	2.23677	0.0203415	364522	0.001294	2	0	-3.9052	968	湖南发展	27.52	D	16.62	2.57	0	0	8.33	1		master only (1)
722	2017	377667	244500000	123300000	77888871	3139000000	215000000	2924000000	湖南发展	1997-05-22	湖南省	长沙市	天心区			D44	电力、热力生产和供应业	0.0248097	0.0684945	21.8673	20	1.98321	-0.132136	308625	0.0012623	2	0	-3.94642	593	湖南发展	28.16	D	16.15	2.17	0	0	9.84	1		master only (1)
723	2010	0	1368000000	1264000000	9.43835e+06	923800000	422900000	500900000	美锦能源	1997-05-15	山西省	太原市	清徐县			C25	石油加工、炼焦及核燃料加工业	0.0102164	0.457779	20.6441	13	1.08197		1200000	0.0008773	2	0	-3.54759	1960	美锦能源	15.9	D	9.9	1.08	0	0	4.92	0		master only (1)
723	2011	0	1531000000	1401000000	21127214	929600000	403800000	525800000	美锦能源	1997-05-15	山西省	太原市	清徐县			C25	石油加工、炼焦及核燃料加工业	0.0227273	0.434366	20.6503	14	1.09282	0.119384	0	0	2	0	-3.58852	2192	美锦能源	15.48	D	8.79	1.76	0	0	4.93	0		master only (1)
723	2012	0	1193000000	1117000000	-33330409	783600000	306100000	477400000	美锦能源	1997-05-15	山西省	太原市	清徐县			C25	石油加工、炼焦及核燃料加工业	-0.0425376	0.390669	20.4794	15	1.06862	-0.220742	0	0	2	0	-3.60176	2443	美锦能源	14.12	D	7.78	2.17	0	0	4.17	0		master only (1)
723	2013	0	1263000000	1095000000	41368774	890800000	397900000	492900000	美锦能源	1997-05-15	山西省	太原市	清徐县			C25	石油加工、炼焦及核燃料加工业	0.0464404	0.446698	20.6076	16	1.15369	0.0588386	0	0	2	0	-3.66208	1807	美锦能源	20.22	D	13.06	2.16	0	0	5	0		master only (1)
723	2014	0	998100000	824700000	9.99474e+06	836800000	335900000	500900000	美锦能源	1997-05-15	山西省	太原市	清徐县			C25	石油加工、炼焦及核燃料加工业	0.0119441	0.401394	20.5451	17	1.21029	-0.209962	0	0	2	0	-3.69235	2570	美锦能源	16.69	D	8.15	3.54	0	0	5	0		master only (1)
723	2015	408000000	5702000000	5042000000	-407900000	14860000000	8202000000	6658000000	美锦能源	1997-05-15	山西省	太原市	清徐县			C25	石油加工、炼焦及核燃料加工业	-0.0274514	0.551948	23.422	18	1.13085	4.71249	1940020	0.0003403	2	0	-3.83174	3135	美锦能源	11.35	D	2.88	4	0	0	4.47	0	20020	matched (3)
723	2016	408000000	7110000000	4931000000	766700000	12600000000	5197000000	7399000000	美锦能源	1997-05-15	山西省	太原市	清徐县			C25	石油加工、炼焦及核燃料加工业	0.0608667	0.412597	23.2567	19	1.44177	0.246986	655980	9.23e-05	2	0	-3.88531	1492	美锦能源	23.85	D	16.99	2.31	0	0	4.55	0	20000	matched (3)
723	2017	409000000	12240000000	9164000000	1225000000	13820000000	5415000000	8403000000	美锦能源	1997-05-15	山西省	太原市	清徐县			C25	石油加工、炼焦及核燃料加工业	0.0886628	0.391882	23.3492	20	1.33537	0.721228	664663	5.43e-05	2	0	-3.918	2390	美锦能源	19.09	D	13.15	1.38	0	0	4.56	0		master only (1)
726	2010	0	5026000000	3391000000	815100000	7016000000	2274000000	4742000000	鲁泰A	2000-12-25	山东省	淄博市	张店区	1	2	C17	纺织业	0.116173	0.324163	22.6714	10	1.48222		40500000	0.0080543	1	1	-3.55444	157	鲁泰A	59.63	C	18.41	9.5	18	9	4.72	0		master only (1)
726	2011	2165177	6079000000	4185000000	892100000	7752000000	2282000000	5470000000	鲁泰A	2000-12-25	山东省	淄博市	张店区	1	2	C17	纺织业	0.115078	0.294377	22.7712	11	1.45233	0.209533	46400000	0.0076333	1	1	-3.59156	416	鲁泰A	53.72	C	16.56	10	12	9	6.16	0	1030000	matched (3)
726	2012	2165177	5901000000	4316000000	715900000	8153000000	2499000000	5655000000	鲁泰A	2000-12-25	山东省	淄博市	张店区	1	2	C17	纺织业	0.0877991	0.306452	22.8217	12	1.3672	-0.0292185	26400000	0.0044778	1	1	-3.62977	36	鲁泰A	78.04	B	22.86	10	20	13	12.18	0	0	matched (3)
726	2013	2165177	6478000000	4482000000	1040000000	8412000000	1997000000	6415000000	鲁泰A	2000-12-25	山东省	淄博市	张店区	1	2	C17	纺织业	0.123611	0.237442	22.8529	13	1.44542	0.0978123	52000000	0.0080253	1	1	-3.66856	189	鲁泰A	70.99	B	26.25	8.38	18	13	5.36	0		master only (1)
726	2014	2165177	6170000000	4235000000	979400000	8628000000	1611000000	7016000000	鲁泰A	2000-12-25	山东省	淄博市	张店区	1	2	C17	纺织业	0.113516	0.186753	22.8782	14	1.45698	-0.0476296	99100000	0.0160668	1	1	-3.70751	318	鲁泰A	30.94	D	23.54	1.93	0	0	5.47	0		master only (1)
726	2015	2465177	6173000000	4341000000	735500000	9091000000	1815000000	7277000000	鲁泰A	2000-12-25	山东省	淄博市	张店区	1	2	C17	纺织业	0.0809074	0.199597	22.9306	15	1.42209	0.000589	43300000	0.0070087	1	1	-3.74517	17	鲁泰A	78.16	B	23.52	8.46	20	20	6.18	0	1830000	matched (3)
726	2016	2465177	5982000000	4005000000	853100000	9407000000	1994000000	7413000000	鲁泰A	2000-12-25	山东省	淄博市	张店区	1	2	C17	纺织业	0.090684	0.211971	22.9647	16	1.49356	-0.0310321	64100000	0.0107195	1	1	-3.78352	88	鲁泰A	71.1	B	23.7	8.45	20	13	5.95	0	0	matched (3)
726	2017	8995680	6409000000	4477000000	883300000	10170000000	2396000000	7775000000	鲁泰A	2000-12-25	山东省	淄博市	张店区	1	2	C17	纺织业	0.08685	0.235536	23.0428	17	1.43157	0.0714628	58100000	0.009065	1	1	-3.81937	693	鲁泰A	27.58	D	22.02	1.1	0	0	4.46	0		master only (1)
731	2010	10800000	3366000000	3117000000	90353540	3648000000	1752000000	1895000000	四川美丰	1997-06-17	四川省	遂宁市	射洪县			C26	化学原料及化学制品制造业	0.0247708	0.48036	22.0173	13	1.0797		18200000	0.0054101	3	0	-3.67214	1809	四川美丰	17.7	D	11.55	2.49	0	0	3.66	1		master only (1)
731	2011	7231999	5247000000	4706000000	267600000	3850000000	1730000000	2120000000	四川美丰	1997-06-17	四川省	遂宁市	射洪县			C26	化学原料及化学制品制造业	0.069511	0.449274	22.0714	14	1.11486	0.558928	7282476	0.001388	3	0	-3.71372	871	四川美丰	26.66	D	19.32	4	0	0	3.34	1		master only (1)
731	2012	7237699	6507000000	5920000000	267300000	4454000000	2172000000	2282000000	四川美丰	1997-06-17	四川省	遂宁市	射洪县			C26	化学原料及化学制品制造业	0.0600103	0.487656	22.217	15	1.09908	0.240138	14600000	0.0022452	3	0	-3.75674	1045	四川美丰	26.06	D	19.88	3.38	0	0	2.8	1		master only (1)
731	2013	7252176	5768000000	5368000000	169200000	4823000000	1786000000	3037000000	四川美丰	1997-06-17	四川省	遂宁市	射洪县			C26	化学原料及化学制品制造业	0.0350772	0.370382	22.2967	16	1.07442	-0.113529	7786460	0.00135	3	0	-3.79762	2033	四川美丰	19.08	D	14.15	1.93	0	0	3	1	430000	matched (3)
731	2014	30400000	4769000000	4548000000	-245400000	4525000000	1761000000	2764000000	四川美丰	1997-06-17	四川省	遂宁市	射洪县			C26	化学原料及化学制品制造业	-0.0542262	0.389214	22.2329	17	1.0487	-0.173181	6382114	0.0013382	3	0	-3.83696	3265	四川美丰	6.13	D	2.97	3.76	0	0	-0.6	1	0	matched (3)
731	2015	33300000	3928000000	3486000000	56932376	5083000000	2255000000	2827000000	四川美丰	1997-06-17	四川省	遂宁市	射洪县			C26	化学原料及化学制品制造业	0.0112016	0.443723	22.3491	18	1.12688	-0.176292	11600000	0.0029511	3	0	-3.8779	2939	四川美丰	14.22	D	8.29	3.13	0	0	2.8	1		master only (1)
731	2016	34000000	2370000000	2134000000	-261800000	4742000000	2175000000	2567000000	四川美丰	1997-06-17	四川省	遂宁市	射洪县			C26	化学原料及化学制品制造业	-0.055206	0.458739	22.2797	19	1.11071	-0.396665	25500000	0.0107701	3	0	-3.91748	3429	四川美丰	3.46	D	1.4	3.04	0	0	-0.98	1		master only (1)
731	2017	34400000	2528000000	1905000000	147800000	4374000000	1658000000	2715000000	四川美丰	1997-06-17	四川省	遂宁市	射洪县			C26	化学原料及化学制品制造业	0.0337861	0.379162	22.1988	20	1.32686	0.0666382	9000210	0.0035602	3	0	-3.95647	2250	四川美丰	19.78	D	13.9	2.67	0	0	3.21	1		master only (1)
737	2010	36900000	2769000000	2185000000	-493000000	3468000000	2966000000	502500000	ST南风	1997-04-28	山西省	运城市	盐湖区			C26	化学原料及化学制品制造业	-0.14215	0.855106	21.9669	13	1.26748		6233067	0.0022509	2	0	-3.67043	2377	南风化工	-2.83	E	-1.04	0.48	0	0	-2.27	1		master only (1)
737	2011	33100000	2979000000	2254000000	123500000	3690000000	3304000000	386300000	ST南风	1997-04-28	山西省	运城市	盐湖区			C26	化学原料及化学制品制造业	0.0334635	0.895316	22.0289	14	1.32167	0.0757238	9841667	0.0033038	2	0	-3.7125	1876	南风化工	18.55	D	8.12	0.58	0	0	9.85	1	1350000	matched (3)
737	2012	33500000	2572000000	2097000000	143900000	3349000000	2893000000	455900000	ST南风	1997-04-28	山西省	运城市	盐湖区			C26	化学原料及化学制品制造业	0.0429676	0.863874	21.9319	15	1.22667	-0.136521	10600000	0.0041038	2	0	-3.74912	2454	南风化工	13.94	D	10.21	0.51	0	0	3.22	1	1480000	matched (3)
737	2013	33600000	2746000000	2148000000	-129300000	3247000000	2952000000	295100000	ST南风	1997-04-28	山西省	运城市	盐湖区			C26	化学原料及化学制品制造业	-0.039836	0.90912	21.901	16	1.27865	0.0675898	6544832	0.0023834	2	0	-3.78787	3118	南风化工	-3.46	E	0.63	0.45	0	0	-4.54	1	20000	matched (3)
737	2014	22400000	2519000000	1997000000	49851106	3055000000	2712000000	343800000	ST南风	1997-04-28	山西省	运城市	盐湖区			C26	化学原料及化学制品制造业	0.0163157	0.887481	21.8402	17	1.2612	-0.0827112	6867238	0.0027263	2	0	-3.82518	3068	南风化工	12.16	D	7.12	1.07	0	0	3.97	1	150000	matched (3)
737	2015	22500000	2152000000	1706000000	-222600000	3013000000	2892000000	121300000	ST南风	1997-04-28	山西省	运城市	盐湖区			C26	化学原料及化学制品制造业	-0.0738645	0.959733	21.8262	18	1.26115	-0.145745	5294523	0.0024605	2	0	-3.86452	3481	南风化工	-0.31	E	-1.43	1.56	0	0	-0.44	1	20000	matched (3)
737	2016	22600000	2135000000	1597000000	18026184	2796000000	2656000000	140300000	ST南风	1997-04-28	山西省	运城市	盐湖区			C26	化学原料及化学制品制造业	0.006446	0.949834	21.7516	19	1.33715	-0.0077138	6117136	0.0028649	2	0	-3.90069	2237	南风化工	19.91	D	7.47	2.44	0	0	10	1	0	matched (3)
737	2017	22600000	1873000000	1502000000	-430800000	2616000000	2907000000	-290500000	ST南风	1997-04-28	山西省	运城市	盐湖区			C26	化学原料及化学制品制造业	-0.164653	1.11103	21.6851	20	1.24672	-0.122957	2902043	0.0015497	2	0	-3.93688	3514	南风化工	-1.57	E	-1.65	1.74	0	0	-1.66	1		master only (1)
751	2010	0	7828000000	7498000000	-583200000	9466000000	8228000000	1238000000	锌业股份	1997-06-26	辽宁省	葫芦岛市	龙港区			C32	有色金属冶炼和压延加工业	-0.0616031	0.869179	22.971	13	1.04405		37300000	0.0047661	1	1	-3.66321	2375	锌业股份	-2.37	E	2.63	0	0	0	-5	1		master only (1)
751	2011	0	6899000000	6840000000	-1085000000	7357000000	7207000000	150100000	锌业股份	1997-06-26	辽宁省	葫芦岛市	龙港区			C32	有色金属冶炼和压延加工业	-0.1475	0.97959	22.7189	14	1.00864	-0.118665	23100000	0.0033476	1	1	-3.71317	2641	锌业股份	-3.23	E	-3.15	0.01	0	0	-0.09	1		master only (1)
751	2012	0	4442000000	4822000000	-3392000000	3270000000	6618000000	-3348000000	锌业股份	1997-06-26	辽宁省	葫芦岛市	龙港区			C32	有色金属冶炼和压延加工业	-1.03752	2.02392	21.908	15	0.921214	-0.356093	29300000	0.0065938	1	1	-3.74816	2823	锌业股份	-2.86	E	-2.45	0	0	0	-0.41	1		master only (1)
751	2013	0	4187000000	3797000000	4145000000	3681000000	1851000000	1831000000	锌业股份	1997-06-26	辽宁省	葫芦岛市	龙港区			C32	有色金属冶炼和压延加工业	1.12612	0.502723	22.0265	16	1.10254	-0.0575414	12200000	0.0029046	1	1	-3.79242	2764	锌业股份	13.18	D	13.18	0	0	0	0	1		master only (1)
751	2014	0	4359000000	3901000000	88874935	3329000000	1412000000	1916000000	锌业股份	1997-06-26	辽宁省	葫芦岛市	龙港区			C32	有色金属冶炼和压延加工业	0.0266996	0.424323	21.9259	17	1.11749	0.0411015	19800000	0.0045323	1	1	-3.82888	3238	锌业股份	7.41	D	7.41	0	0	0	0	1		master only (1)
751	2015	1094600	4127000000	3540000000	90766875	3643000000	1636000000	2007000000	锌业股份	1997-06-26	辽宁省	葫芦岛市	龙港区			C32	有色金属冶炼和压延加工业	0.0249161	0.44906	22.016	18	1.16568	-0.0531807	12200000	0.0029471	1	1	-3.8721	3222	锌业股份	8.09	D	7.85	0.24	0	0	0	1		master only (1)
751	2016	1032642	4713000000	4122000000	134400000	4145000000	2004000000	2141000000	锌业股份	1997-06-26	辽宁省	葫芦岛市	龙港区			C32	有色金属冶炼和压延加工业	0.0324241	0.483367	22.1452	19	1.14335	0.142051	4753323	0.0010085	1	1	-3.91548	3325	锌业股份	8.43	D	8.43	0	0	0	0	1		master only (1)
751	2017	1032642	6700000000	6093000000	216200000	4160000000	1784000000	2376000000	锌业股份	1997-06-26	辽宁省	葫芦岛市	龙港区			C32	有色金属冶炼和压延加工业	0.0519791	0.428925	22.1488	20	1.09959	0.421397	7177695	0.0010714	1	1	-3.95555	3253	锌业股份	9.75	D	9.75	0	0	0	0	0		master only (1)
758	2010	750000000	5954000000	4861000000	316500000	10010000000	5951000000	4061000000	中色股份	1997-04-16	北京市	北京市	丰台区			B09	有色金属矿采选业	0.0316128	0.594376	23.0271	13	1.22496		34400000	0.0057825	1	1	-3.66025	503	中色股份	42.22	C	11.45	8.28	10	8	4.49	1		master only (1)
758	2011	752000000	10020000000	8529000000	506800000	12550000000	8127000000	4421000000	中色股份	1997-04-16	北京市	北京市	丰台区			B09	有色金属矿采选业	0.0403828	0.647664	23.2529	14	1.17449	0.682264	11700000	0.0011657	1	1	-3.68559	363	中色股份	56.57	C	14.82	9.75	10	17	5	1		master only (1)
758	2012	754000000	14510000000	13250000000	225500000	15600000000	10930000000	4668000000	中色股份	1997-04-16	北京市	北京市	丰台区			B09	有色金属矿采选业	0.0144592	0.700724	23.4703	15	1.09481	0.448173	26900000	0.0018523	1	1	-3.70733	360	中色股份	61.59	B	14.12	9.73	15	17	5.74	1	800000	matched (3)
758	2013	754000000	17870000000	16630000000	173200000	16910000000	10630000000	6283000000	中色股份	1997-04-16	北京市	北京市	丰台区			B09	有色金属矿采选业	0.0102417	0.628521	23.5513	16	1.07415	0.231619	118000000	0.0066284	1	1	-3.73949	579	中色股份	52.95	C	10.34	9.61	11	17	5	1	7500	matched (3)
758	2014	755000000	18220000000	16580000000	320000000	19340000000	12790000000	6555000000	中色股份	1997-04-16	北京市	北京市	丰台区			B09	有色金属矿采选业	0.0165458	0.661073	23.6855	17	1.09919	0.0200346	71200000	0.0039064	1	1	-3.76527	2622	中色股份	16.45	D	10.94	0.51	0	0	5	1	30000	matched (3)
758	2015	755000000	19610000000	17920000000	292400000	22850000000	16370000000	6476000000	中色股份	1997-04-16	北京市	北京市	丰台区			B09	有色金属矿采选业	0.0127943	0.716595	23.8522	18	1.09396	0.0758941	56600000	0.0028856	1	1	-3.78543	2480	中色股份	17.67	D	12.18	0.49	0	0	5	1	30000	matched (3)
758	2016	759000000	19110000000	17190000000	342600000	23910000000	17090000000	6820000000	中色股份	1997-04-16	北京市	北京市	丰台区			B09	有色金属矿采选业	0.0143296	0.714752	23.8976	19	1.11178	-0.0251199	199000000	0.0104059	1	1	-3.81962	2842	中色股份	16.58	D	10.67	0.91	0	0	5	1	30000	matched (3)
758	2017	761000000	15430000000	12980000000	368900000	22540000000	15650000000	6888000000	中色股份	1997-04-16	北京市	北京市	丰台区			B09	有色金属矿采选业	0.0163691	0.694418	23.8385	20	1.18868	-0.192891	70700000	0.0045828	1	1	-3.86715	2881	中色股份	15.53	D	9.64	0.89	0	0	5	1	408000	matched (3)
761	2010	0	45690000000	40760000000	925300000	35870000000	20830000000	15050000000	本钢板材	1998-01-15	辽宁省	本溪市	平山区			C31	黑色金属冶炼及压延加工业	0.0257953	0.58058	24.3032	12	1.12098		1881327	4.12e-05	1	1	-3.47978	2117	本钢板材	13.78	D	10.88	1.45	0	0	1.45	1		master only (1)
761	2011	0	50430000000	46130000000	795600000	41060000000	25500000000	15560000000	本钢板材	1998-01-15	辽宁省	本溪市	平山区			C31	黑色金属冶炼及压延加工业	0.0193756	0.621051	24.4383	13	1.09331	0.103837	45600000	0.0009041	1	1	-3.49672	2005	本钢板材	17.57	D	15.18	0.89	0	0	1.5	1	8400000	matched (3)
761	2012	0	44590000000	41890000000	69455538	38330000000	23010000000	15320000000	本钢板材	1998-01-15	辽宁省	本溪市	平山区			C31	黑色金属冶炼及压延加工业	0.0018122	0.600391	24.3694	14	1.0645	-0.115802	28200000	0.0006323	1	1	-3.54868	2320	本钢板材	16.02	D	10.47	0.55	0	0	5	1	0	matched (3)
761	2013	141509	40330000000	37750000000	279400000	43050000000	27370000000	15680000000	本钢板材	1998-01-15	辽宁省	本溪市	平山区			C31	黑色金属冶炼及压延加工业	0.0064911	0.635808	24.4856	15	1.06827	-0.0955869	159000000	0.0039534	1	1	-3.56826	2496	本钢板材	16.26	D	11.77	0.61	0	0	3.88	1		master only (1)
761	2014	141509	41420000000	38490000000	314900000	49170000000	33330000000	15840000000	本钢板材	1998-01-15	辽宁省	本溪市	平山区			C31	黑色金属冶炼及压延加工业	0.0064037	0.67792	24.6186	16	1.0762	0.0270955	18700000	0.000452	1	1	-3.58349	2850	本钢板材	14.6	D	12.38	0.26	0	0	1.96	1		master only (1)
761	2015	141509	29250000000	29810000000	-3241000000	44460000000	32020000000	12440000000	本钢板材	1998-01-15	辽宁省	本溪市	平山区			C31	黑色金属冶炼及压延加工业	-0.0728927	0.720229	24.5179	17	0.981274	-0.293767	137000000	0.0046829	1	1	-3.64239	3430	本钢板材	0.71	D	-1.75	0.25	0	0	2.21	1	91500000	matched (3)
761	2016	397065	29530000000	25680000000	825500000	54200000000	40890000000	13310000000	本钢板材	1998-01-15	辽宁省	本溪市	平山区			C31	黑色金属冶炼及压延加工业	0.0152313	0.754481	24.7159	18	1.14987	0.0093108	36100000	0.0012223	1	1	-3.64439	3177	本钢板材	12.61	D	8.83	0.15	0	0	3.63	1	0	matched (3)
761	2017	409458	40510000000	35680000000	1609000000	63000000000	48150000000	14850000000	本钢板材	1998-01-15	辽宁省	本溪市	平山区			C31	黑色金属冶炼及压延加工业	0.0255466	0.764294	24.8664	19	1.13537	0.371938	39100000	0.0009649	1	1	-3.65326	2439	本钢板材	18.84	D	15.62	0.26	0	0	2.96	1	8054000	matched (3)
762	2010	32100000	468800000	275300000	10093514	1220000000	382000000	837800000	西藏矿业	1997-07-08	西藏自治区	拉萨市	城关区			B08	黑色金属矿采选业	0.0082746	0.313195	20.922	13	1.70285		10800000	0.0230985	3	0	-3.58588	2204	西藏矿业	10.71	D	2.54	3.17	0	0	5	1		master only (1)
762	2011	32100000	556600000	404800000	27063063	2641000000	355600000	2285000000	西藏矿业	1997-07-08	西藏自治区	拉萨市	城关区			B08	黑色金属矿采选业	0.0102474	0.134656	21.6944	14	1.37499	0.187276	9646295	0.0173292	3	0	-3.69744	440	西藏矿业	52.79	C	13.87	12.55	10	11	5.37	1		master only (1)
762	2012	32000000	510500000	372700000	-160100000	2517000000	436100000	2080000000	西藏矿业	1997-07-08	西藏自治区	拉萨市	城关区			B08	黑色金属矿采选业	-0.0636023	0.173278	21.6461	15	1.36987	-0.0828864	6179481	0.0121045	3	0	-3.73447	608	西藏矿业	45.91	C	2.11	13.53	8	20	2.27	1	1000000	matched (3)
762	2013	32000000	718800000	565700000	27075904	2591000000	486100000	2105000000	西藏矿业	1997-07-08	西藏自治区	拉萨市	城关区			B08	黑色金属矿采选业	0.01045	0.187615	21.6753	16	1.27069	0.408035	1140960	0.0015873	3	0	-3.77629	583	西藏矿业	52.44	C	6.84	13.26	12	17	3.34	1	0	matched (3)
762	2014	32000000	514700000	470000000	-98859843	2664000000	677100000	1986000000	西藏矿业	1997-07-08	西藏自治区	拉萨市	城关区			B08	黑色金属矿采选业	-0.037116	0.254193	21.7029	17	1.09504	-0.283984	2546186	0.0049471	3	0	-3.81794	3280	西藏矿业	5.16	D	2.32	2.31	0	0	0.53	1	11976.7	matched (3)
762	2015	32000000	910900000	749400000	35695000	2403000000	381500000	2021000000	西藏矿业	1997-07-08	西藏自治区	拉萨市	城关区			B08	黑色金属矿采选业	0.0148572	0.158811	21.5998	18	1.21554	0.76981	4565975	0.0050126	3	0	-3.85143	147	西藏矿业	63.86	B	9.58	13.48	12	26	2.8	1	88023.3	matched (3)
762	2016	303000000	695600000	516600000	56706210	2922000000	413400000	2508000000	西藏矿业	1997-07-08	西藏自治区	拉萨市	城关区			B08	黑色金属矿采选业	0.0194096	0.141493	21.7954	19	1.34658	-0.236343	2346746	0.0033737	3	0	-3.903	223	西藏矿业	64.37	B	10.06	13.43	15	23	2.88	1	300000	matched (3)
762	2017	303000000	667600000	419500000	87001611	3107000000	511900000	2595000000	西藏矿业	1997-07-08	西藏自治区	拉萨市	城关区			B08	黑色金属矿采选业	0.0280028	0.164759	21.8569	20	1.59144	-0.0403343	1869426	0.0028004	3	0	-3.94595	2455	西藏矿业	18.73	D	10.61	3.15	0	0	4.97	1	0	matched (3)
767	2010	13400000	4248000000	4728000000	-747500000	12160000000	10620000000	1545000000	漳泽电力	1997-06-09	山西省	太原市	小店区			D44	电力、热力生产和供应业	-0.0614643	0.872932	23.2215	13	0.898496		57000000	0.0134058	2	0	-3.64789	2380	漳泽电力	-4.1	E	1.22	1.17	0	0	-6.49	1		master only (1)
767	2011	14100000	4103000000	4568000000	-788800000	12130000000	11360000000	765300000	漳泽电力	1997-06-09	山西省	太原市	小店区			D44	电力、热力生产和供应业	-0.065041	0.936899	23.2188	14	0.898244	-0.0341653	11900000	0.0029042	2	0	-3.68809	2573	漳泽电力	1.81	D	-1.76	2.83	0	0	0.74	1	3000000	matched (3)
767	2012	14600000	4938000000	4786000000	40570181	12310000000	11500000000	804600000	漳泽电力	1997-06-09	山西省	太原市	小店区			D44	电力、热力生产和供应业	0.0032961	0.934627	23.2336	15	1.03162	0.203415	175000000	0.0353733	2	0	-3.72702	2810	漳泽电力	-1.92	E	5.08	3	0	0	-10	1	0	matched (3)
767	2013	18600000	9151000000	7498000000	602300000	30480000000	25170000000	5304000000	漳泽电力	1997-06-09	山西省	太原市	小店区			D44	电力、热力生产和供应业	0.0197624	0.825965	24.1403	16	1.22051	0.853287	20900000	0.0022791	2	0	-3.66551	2352	漳泽电力	17.54	D	9.48	0.83	0	0	7.23	1	5000000	matched (3)
767	2014	22600000	10920000000	8903000000	676600000	30300000000	24210000000	6092000000	漳泽电力	1997-06-09	山西省	太原市	小店区			D44	电力、热力生产和供应业	0.0223299	0.798957	24.1345	17	1.2268	0.193607	36300000	0.0033276	2	0	-3.70639	1998	漳泽电力	19.14	D	10.04	1.3	0	0	7.8	1	217428	matched (3)
767	2015	27000000	9097000000	7038000000	600000000	33200000000	25750000000	7446000000	漳泽电力	1997-06-09	山西省	太原市	小店区			D44	电力、热力生产和供应业	0.0180747	0.775691	24.2257	18	1.29269	-0.167112	33400000	0.0036757	2	0	-3.73231	1760	漳泽电力	20.87	D	9.94	0.93	0	0	10	1	5880000	matched (3)
767	2016	32500000	8258000000	7011000000	137700000	45400000000	34860000000	10540000000	漳泽电力	1997-06-09	山西省	太原市	小店区			D44	电力、热力生产和供应业	0.0030335	0.767856	24.5387	19	1.17786	-0.0922592	49200000	0.0059607	2	0	-3.71856	2596	漳泽电力	18.08	D	7.23	0.85	0	0	10	1	10200000	matched (3)
767	2017	37900000	9520000000	10270000000	-2039000000	48410000000	40390000000	8015000000	漳泽电力	1997-06-09	山西省	太原市	小店区			D44	电力、热力生产和供应业	-0.042112	0.834438	24.6029	20	0.926902	0.152853	44700000	0.0046926	2	0	-3.74649	3502	漳泽电力	-1.06	E	-0.75	0.68	0	0	-0.99	1	3000000	matched (3)
780	2010	1100000000	3226000000	2013000000	647800000	5190000000	1528000000	3662000000	平庄能源	1997-06-06	内蒙古自治区	赤峰市	元宝山区			B06	煤炭开采和洗选业	0.124801	0.294376	22.37	13	1.60237		17300000	0.0053623	3	0	-3.67795	1226	平庄能源	21.16	D	17.94	0.49	0	0	2.73	1	400000	matched (3)
780	2011	1100000000	3944000000	2315000000	902400000	5378000000	867900000	4510000000	平庄能源	1997-06-06	内蒙古自治区	赤峰市	元宝山区			B06	煤炭开采和洗选业	0.167788	0.161376	22.4056	14	1.70354	0.222354	3100000	0.0007861	3	0	-3.71794	229	平庄能源	63.56	B	21.19	11.21	11	14	6.16	1	0	matched (3)
780	2012	1110000000	3590000000	2467000000	410600000	5572000000	909300000	4663000000	平庄能源	1997-06-06	内蒙古自治区	赤峰市	元宝山区			B06	煤炭开采和洗选业	0.0736954	0.163188	22.441	15	1.45555	-0.0895877	0	0	3	0	-3.75783	129	平庄能源	70.72	B	18.67	11.12	12	21.5	7.43	1		master only (1)
780	2013	1110000000	2998000000	2259000000	37043859	5600000000	953300000	4647000000	平庄能源	1997-06-06	内蒙古自治区	赤峰市	元宝山区			B06	煤炭开采和洗选业	0.0066147	0.170233	22.4461	16	1.32707	-0.165016	0	0	3	0	-3.7978	498	平庄能源	59.17	C	11.77	11.4	12	17	7	1		master only (1)
780	2014	1110000000	2554000000	1879000000	27382458	5631000000	959600000	4672000000	平庄能源	1997-06-06	内蒙古自治区	赤峰市	元宝山区			B06	煤炭开采和洗选业	0.0048625	0.170397	22.4516	17	1.35944	-0.147893	102052	3.99e-05	3	0	-3.83777	2822	平庄能源	14.85	D	9.33	0.52	0	0	5	1		master only (1)
780	2015	1560000000	2044000000	1750000000	-390600000	5683000000	1370000000	4313000000	平庄能源	1997-06-06	内蒙古自治区	赤峰市	元宝山区			B06	煤炭开采和洗选业	-0.0687346	0.241054	22.4607	18	1.16774	-0.199889	327050	0.00016	3	0	-3.87771	3402	平庄能源	1.49	D	0.77	0.34	0	0	0.38	1		master only (1)
780	2016	1570000000	2167000000	1863000000	-323600000	5309000000	1224000000	4085000000	平庄能源	1997-06-06	内蒙古自治区	赤峰市	元宝山区			B06	煤炭开采和洗选业	-0.0609566	0.2305	22.3926	19	1.16297	0.0600761	206590	9.53e-05	3	0	-3.91796	3456	平庄能源	1.82	D	1.79	0.46	0	0	-0.43	1		master only (1)
780	2017	1570000000	2808000000	1558000000	483800000	5897000000	1290000000	4607000000	平庄能源	1997-06-06	内蒙古自治区	赤峰市	元宝山区			B06	煤炭开采和洗选业	0.082035	0.218822	22.4978	20	1.80239	0.295996	70200000	0.0249965	3	0	-3.95742	1520	平庄能源	23.37	D	23.2	1.14	0	0	-0.97	1		master only (1)
782	2010	0	3890000000	3541000000	99040397	2425000000	1460000000	964700000	美达股份	1997-06-19	广东省	江门市	新会区			C28	化学纤维制造业	0.0408492	0.602127	21.6089	13	1.09858		19500000	0.005015	1	1	-3.65204	2127	美达股份	13.47	D	11.39	1.32	0	0	0.76	0		master only (1)
782	2011	0	4586000000	4191000000	138500000	2364000000	1285000000	1079000000	美达股份	1997-06-19	广东省	江门市	新会区			C28	化学纤维制造业	0.0585905	0.543669	21.5835	14	1.09422	0.178784	18900000	0.0041325	1	1	-3.69032	2102	美达股份	16.6	D	13.41	1.68	0	0	1.51	0		master only (1)
782	2012	0	3811000000	3539000000	33676161	2104000000	1012000000	1092000000	美达股份	1997-06-19	广东省	江门市	新会区			C28	化学纤维制造业	0.0160067	0.480951	21.4671	15	1.07706	-0.168859	25000000	0.0065669	1	1	-3.7217	2624	美达股份	8.81	D	2.02	2.1	0	0	4.69	0		master only (1)
782	2013	0	3700000000	3465000000	7552063	2618000000	1531000000	1087000000	美达股份	1997-06-19	广东省	江门市	新会区			C28	化学纤维制造业	0.0028846	0.584809	21.6857	16	1.06786	-0.0291791	9134506	0.0024687	1	1	-3.77691	2486	美达股份	16.35	D	10.1	1.25	0	0	5	0		master only (1)
782	2014	0	3364000000	3208000000	-237400000	2543000000	1264000000	1280000000	美达股份	1997-06-19	广东省	江门市	新会区			C28	化学纤维制造业	-0.0933307	0.496837	21.6568	17	1.04867	-0.0909361	3696428	0.0010989	1	1	-3.81514	3419	美达股份	-0.07	E	-1.79	1.81	0	0	-0.09	0		master only (1)
782	2015	0	2847000000	2615000000	47097637	2297000000	994900000	1302000000	美达股份	1997-06-19	广东省	江门市	新会区			C28	化学纤维制造业	0.0205003	0.433064	21.5551	18	1.08863	-0.153557	3714918	0.0013048	1	1	-3.84832	3201	美达股份	8.81	D	5.96	1.66	0	0	1.19	0		master only (1)
782	2016	0	2420000000	2234000000	-81583302	2544000000	1333000000	1211000000	美达股份	1997-06-19	广东省	江门市	新会区			C28	化学纤维制造业	-0.0320632	0.524044	21.6572	19	1.08321	-0.150045	13000000	0.0053889	1	1	-3.89516	3400	美达股份	4.45	D	2.76	1.69	0	0	0	0		master only (1)
782	2017	0	3559000000	3267000000	36803492	2634000000	1397000000	1238000000	美达股份	1997-06-19	广东省	江门市	新会区			C28	化学纤维制造业	0.0139698	0.530245	21.692	20	1.08922	0.470598	2042398	0.0005739	1	1	-3.93729	3305	美达股份	7.52	D	5.89	1.61	0	0	0.02	0		master only (1)
786	2010	96000000	4369000000	3187000000	611000000	7357000000	4137000000	3220000000	北新建材	1997-06-06	北京市	北京市	海淀区			C30	非金属矿物制品业	0.083046	0.562323	22.7189	13	1.37098		50500000	0.0115662	1	1	-3.67317	306	北新建材	54.36	C	16.37	9.81	10	17	1.18	1	21300000	matched (3)
786	2011	94600000	5969000000	4611000000	751900000	8515000000	4772000000	3743000000	北新建材	1997-06-06	北京市	北京市	海淀区			C30	非金属矿物制品业	0.0883023	0.560453	22.8651	14	1.2946	0.366221	94300000	0.0157959	1	1	-3.70806	65	北新建材	72.66	B	20.6	9.74	15	24	3.32	1	5748035	matched (3)
786	2012	99100000	6685000000	4910000000	935100000	9418000000	4957000000	4461000000	北新建材	1997-06-06	北京市	北京市	海淀区			C30	非金属矿物制品业	0.0992813	0.526314	22.9659	15	1.36153	0.119956	67000000	0.0100176	1	1	-3.74346	1397	北新建材	22.98	D	20.5	0.56	0	0	1.92	1	12000000	matched (3)
786	2013	20500000	7490000000	5263000000	1258000000	10590000000	5157000000	5432000000	北新建材	1997-06-06	北京市	北京市	海淀区			C30	非金属矿物制品业	0.118809	0.487038	23.0831	16	1.4231	0.120405	114000000	0.0152696	1	1	-3.77702	1191	北新建材	24.57	D	21.73	0.59	0	0	2.25	1	10500000	matched (3)
786	2014	20600000	8295000000	5815000000	1469000000	13370000000	4847000000	8525000000	北新建材	1997-06-06	北京市	北京市	海淀区			C30	非金属矿物制品业	0.109861	0.362489	23.3165	17	1.42652	0.107469	180000000	0.0216654	1	1	-3.80067	913	北新建材	24.69	D	21.98	0.64	0	0	2.07	1	8845000	matched (3)
786	2015	18600000	7551000000	5191000000	1216000000	13600000000	4343000000	9261000000	北新建材	1997-06-06	北京市	北京市	海淀区			C30	非金属矿物制品业	0.089367	0.319232	23.3337	18	1.45467	-0.0896746	90700000	0.0120141	1	1	-3.83928	1218	北新建材	23.75	D	20.52	0.72	0	0	2.51	1	7420000	matched (3)
786	2016	18800000	8156000000	5368000000	1465000000	14350000000	3886000000	10460000000	北新建材	1997-06-06	北京市	北京市	海淀区			C30	非金属矿物制品业	0.102123	0.270823	23.387	19	1.51937	0.0801067	95000000	0.0116432	1	1	-3.87481	1475	北新建材	23.92	D	21.07	0.72	0	0	2.13	1	6760000	matched (3)
786	2017	19200000	11160000000	7008000000	2355000000	16110000000	3615000000	12500000000	北新建材	1997-06-06	北京市	北京市	海淀区			C30	非金属矿物制品业	0.14617	0.224386	23.5027	20	1.59311	0.368837	89900000	0.0080535	1	1	-3.90426	1252	北新建材	24.55	D	21.56	0.69	0	0	2.3	1	4200000	matched (3)
789	2010	217000000	3847000000	3059000000	290400000	6587000000	4253000000	2334000000	万年青	1997-09-23	江西省	上饶市	万年县	1	1	C30	非金属矿物制品业	0.0440921	0.645621	22.6083	13	1.25759		70100000	0.0182322	2	0	-3.67582	1819	万年青	17.58	D	12.55	0.46	0	0	4.57	1	0	matched (3)
789	2011	219000000	5649000000	4043000000	783100000	7028000000	4418000000	2609000000	万年青	1997-09-23	江西省	上饶市	万年县	1	1	C30	非金属矿物制品业	0.111423	0.628698	22.6731	14	1.39714	0.468277	82500000	0.0146022	2	0	-3.7144	842	万年青	27.2	D	21.89	0.35	0	0	4.96	1		master only (1)
789	2012	267000000	4658000000	3744000000	281000000	7191000000	4332000000	2859000000	万年青	1997-09-23	江西省	上饶市	万年县	1	1	C30	非金属矿物制品业	0.0390785	0.602432	22.6961	15	1.24416	-0.175299	123000000	0.0264327	2	0	-3.75381	1536	万年青	21.98	D	16.55	0.43	0	0	5	1	1500000	matched (3)
789	2013	270000000	6179000000	4566000000	698000000	7846000000	4297000000	3548000000	万年青	1997-09-23	江西省	上饶市	万年县	1	1	C30	非金属矿物制品业	0.0889646	0.547725	22.7832	16	1.35314	0.326412	95800000	0.0155037	2	0	-3.79115	886	万年青	27.69	D	22.14	1	0	0	4.55	1	700000	matched (3)
789	2014	271000000	6683000000	4862000000	876000000	8837000000	4633000000	4204000000	万年青	1997-09-23	江西省	上饶市	万年县	1	1	C30	非金属矿物制品业	0.0991345	0.5243	22.9022	17	1.37437	0.0815272	116000000	0.0173177	2	0	-3.82647	666	万年青	26.42	D	21.78	1.13	0	0	3.51	1	0	matched (3)
789	2015	332000000	5583000000	4407000000	342900000	9008000000	4922000000	4086000000	万年青	1997-09-23	江西省	上饶市	万年县	1	1	C30	非金属矿物制品业	0.0380677	0.546393	22.9214	18	1.26676	-0.164562	88200000	0.0157939	2	0	-3.8656	1392	万年青	22.7	D	16.9	0.89	0	0	4.91	1	4370000	matched (3)
789	2016	350000000	5658000000	4327000000	386600000	8480000000	4092000000	4388000000	万年青	1997-09-23	江西省	上饶市	万年县	1	1	C30	非金属矿物制品业	0.0455873	0.482544	22.861	19	1.30754	0.0133866	72200000	0.0127653	2	0	-3.90823	1726	万年青	22.52	D	17.86	0.89	0	0	3.77	1	10500000	matched (3)
789	2017	367000000	7094000000	5224000000	842000000	8374000000	3741000000	4633000000	万年青	1997-09-23	江西省	上饶市	万年县	1	1	C30	非金属矿物制品业	0.100552	0.446705	22.8484	20	1.35802	0.253819	92800000	0.013075	2	0	-3.94874	823	万年青	26.81	D	21.99	0.9	0	0	3.92	1	0	matched (3)
791	2010	117660	289400000	243400000	5.20822e+06	717600000	369400000	348200000	甘肃电投	1997-10-14	甘肃省	兰州市	城关区	2	2	D44	电力、热力生产和供应业	0.0072579	0.514789	20.3914	13	1.18896		5625010	0.0194396	3	0	-3.50701	1823	甘肃电投	17.52	D	8.67	4	0	0	4.85	1	500000	matched (3)
791	2011	99700	330200000	265900000	-11647829	748000000	411500000	336500000	甘肃电投	1997-10-14	甘肃省	兰州市	城关区	2	2	D44	电力、热力生产和供应业	-0.015572	0.550087	20.4329	14	1.2415	0.140987	2817442	0.0085337	3	0	-3.55405	2482	甘肃电投	7.64	D	4.9	4	0	0	-1.26	1	532432	matched (3)
791	2012	1900755	1565000000	744900000	343200000	13130000000	9738000000	3391000000	甘肃电投	1997-10-14	甘肃省	兰州市	城关区	2	2	D44	电力、热力生产和供应业	0.0261358	0.741722	23.2981	15	2.10135	3.74096	0	0	3	0	-3.72213	2097	甘肃电投	18.03	D	16.45	0.53	0	0	1.05	1		master only (1)
791	2013	1900755	1601000000	789000000	343700000	13180000000	9524000000	3656000000	甘肃电投	1997-10-14	甘肃省	兰州市	城关区	2	2	D44	电力、热力生产和供应业	0.0260798	0.722607	23.3019	16	2.02866	0.0226336	0	0	3	0	-3.76183	2285	甘肃电投	17.89	D	15.94	0.54	0	0	1.41	1		master only (1)
791	2014	2311794	1467000000	793200000	205900000	13620000000	9836000000	3785000000	甘肃电投	1997-10-14	甘肃省	兰州市	城关区	2	2	D44	电力、热力生产和供应业	0.015116	0.722105	23.3349	17	1.85003	-0.0832742	0	0	3	0	-3.79918	2780	甘肃电投	15.2	D	12.91	0.55	0	0	1.74	1		master only (1)
791	2015	2319658	1326000000	810000000	30665292	13390000000	9624000000	3769000000	甘肃电投	1997-10-14	甘肃省	兰州市	城关区	2	2	D44	电力、热力生产和供应业	0.0022896	0.718553	23.318	18	1.63656	-0.0966054	50000	3.77e-05	3	0	-3.84055	2901	甘肃电投	14.58	D	9.03	0.55	0	0	5	1		master only (1)
791	2016	2824775	1592000000	1077000000	-114500000	18930000000	13780000000	5153000000	甘肃电投	1997-10-14	甘肃省	兰州市	城关区	2	2	D44	电力、热力生产和供应业	-0.006049	0.727771	23.664	19	1.47811	0.200594	206000	0.0001294	3	0	-3.84764	3452	甘肃电投	2.09	D	6.51	0.47	0	0	-4.89	1		master only (1)
791	2017	5257413	1903000000	1071000000	252300000	19010000000	13210000000	5798000000	甘肃电投	1997-10-14	甘肃省	兰州市	城关区	2	2	D44	电力、热力生产和供应业	0.0132697	0.695013	23.6683	20	1.7765	0.195791	50000	2.63e-05	3	0	-3.88717	2541	甘肃电投	18.14	D	13.9	1.92	0	0	2.32	1		master only (1)
792	2010	0	4952000000	2080000000	1862000000	10660000000	4733000000	5926000000	盐湖股份	1997-09-04	青海省	海西蒙古族藏族自治州	格尔木市	1	1	C26	化学原料及化学制品制造业	0.174684	0.444052	23.0897	13	2.38054		4980000	0.0010057	3	0	-3.65662	56	盐湖股份	65.79	B	18.77	7.76	12	20	7.26	1		master only (1)
792	2011	728000000	6778000000	2352000000	2818000000	29370000000	14460000000	14910000000	盐湖股份	1997-09-04	青海省	海西蒙古族藏族自治州	格尔木市	1	1	C26	化学原料及化学制品制造业	0.0959311	0.492258	24.1033	14	2.8818	0.368755	49400000	0.0072865	3	0	-3.59104	132	盐湖股份	68.35	B	18.26	13.19	14	17	5.9	1		master only (1)
792	2012	750000000	8271000000	3656000000	2752000000	42440000000	24750000000	17690000000	盐湖股份	1997-09-04	青海省	海西蒙古族藏族自治州	格尔木市	1	1	C26	化学原料及化学制品制造业	0.0648427	0.583211	24.4714	15	2.26254	0.220322	111000000	0.0134599	3	0	-3.57084	244	盐湖股份	66.12	B	19.26	11.28	13	17	5.58	1	2190000	matched (3)
792	2013	750000000	8095000000	3930000000	1066000000	53800000000	35800000000	18010000000	盐湖股份	1997-09-04	青海省	海西蒙古族藏族自治州	格尔木市	1	1	C26	化学原料及化学制品制造业	0.0198165	0.665331	24.7085	16	2.05946	-0.021308	62400000	0.0077089	3	0	-3.56586	369	盐湖股份	64.4	B	16.41	11.45	15	17	4.54	1	0	matched (3)
792	2014	756000000	10470000000	5077000000	1331000000	67900000000	48620000000	19280000000	盐湖股份	1997-09-04	青海省	海西蒙古族藏族自治州	格尔木市	1	1	C26	化学原料及化学制品制造业	0.0196082	0.716052	24.9413	17	2.06302	0.293998	64200000	0.0061275	3	0	-3.55703	74	盐湖股份	62.16	B	17.09	12.05	15	14	4.02	1	300000	matched (3)
792	2015	808000000	10880000000	5192000000	544200000	80710000000	56230000000	24480000000	盐湖股份	1997-09-04	青海省	海西蒙古族藏族自治州	格尔木市	1	1	C26	化学原料及化学制品制造业	0.0067428	0.696674	25.1142	18	2.09591	0.0389388	110000000	0.0100936	3	0	-3.55775	2251	盐湖股份	18.62	D	10.53	3.09	0	0	5	1	500000	matched (3)
792	2016	839000000	10360000000	5941000000	209600000	82950000000	56570000000	26370000000	盐湖股份	1997-09-04	青海省	海西蒙古族藏族自治州	格尔木市	1	1	C26	化学原料及化学制品制造业	0.0025268	0.682064	25.1414	19	1.74462	-0.0476083	61000000	0.005885	3	0	-3.59131	222	盐湖股份	64.38	B	10.6	13.78	15	20	5	1	1687000	matched (3)
792	2017	1270000000	11700000000	7778000000	-4288000000	82420000000	60180000000	22240000000	盐湖股份	1997-09-04	青海省	海西蒙古族藏族自治州	格尔木市	1	1	C26	化学原料及化学制品制造业	-0.0520321	0.730204	25.1351	20	1.50411	0.128835	85100000	0.0072742	3	0	-3.63282	3461	盐湖股份	0.11	D	-0.87	1.72	0	0	-0.74	1	1036000	matched (3)
795	2010	68600000	741000000	629600000	10454253	1428000000	1172000000	255900000	英洛华	1997-08-08	山西省	太原市	迎泽区			C30	非金属矿物制品业	0.007321	0.820811	21.0795	13	1.17692		7441050	0.0100425	2	0	-3.60465	2241	英洛华	9.01	D	8.12	0.83	0	0	0.06	0	80000	matched (3)
795	2011	60900000	1370000000	1017000000	111800000	1568000000	1200000000	367600000	英洛华	1997-08-08	山西省	太原市	迎泽区			C30	非金属矿物制品业	0.0712805	0.765506	21.1729	14	1.34688	0.849258	3865100	0.0028208	2	0	-3.65476	2031	英洛华	17.32	D	11.73	2.1	0	0	3.49	0	160000	matched (3)
795	2012	68800000	1410000000	1188000000	14050767	1773000000	1391000000	381700000	英洛华	1997-08-08	山西省	太原市	迎泽区			C30	非金属矿物制品业	0.0079256	0.784707	21.2959	15	1.18632	0.0287467	11200000	0.0079383	2	0	-3.70692	2488	英洛华	13.34	D	6.63	1.71	0	0	5	0		master only (1)
795	2013	69100000	888800000	842000000	-159200000	1534000000	1311000000	222500000	英洛华	1997-08-08	山西省	太原市	迎泽区			C30	非金属矿物制品业	-0.103778	0.854923	21.151	16	1.05563	-0.36944	18600000	0.020968	2	0	-3.73245	3093	英洛华	-1.27	E	-3.21	2.01	0	0	-0.07	0	10000	matched (3)
795	2014	70100000	779400000	721600000	10778926	1825000000	1044000000	781000000	英洛华	1997-08-08	山西省	太原市	迎泽区			C30	非金属矿物制品业	0.0059056	0.572082	21.325	17	1.08015	-0.123111	16400000	0.0210153	2	0	-3.78961	3227	英洛华	7.75	D	4.6	1.25	0	0	1.9	0		master only (1)
795	2015	70700000	1127000000	948300000	-59334670	1927000000	736600000	1190000000	英洛华	1997-08-08	山西省	太原市	迎泽区			C30	非金属矿物制品业	-0.0307936	0.382267	21.3791	18	1.18819	0.445706	25200000	0.0223378	2	0	-3.83443	3437	英洛华	0.53	D	3.25	1.79	0	0	-4.51	0		master only (1)
795	2016	91900000	1651000000	1339000000	31379353	2525000000	525100000	2000000000	英洛华	1997-08-08	山西省	太原市	迎泽区			C30	非金属矿物制品业	0.012427	0.20797	21.6495	19	1.23329	0.465252	40300000	0.0244348	2	0	-3.89468	3050	英洛华	14.49	D	7.92	1.57	0	0	5	0	2600000	matched (3)
795	2017	93200000	1857000000	1424000000	103400000	2625000000	524000000	2101000000	英洛华	1997-08-08	山西省	太原市	迎泽区			C30	非金属矿物制品业	0.0393977	0.199601	21.6884	20	1.30437	0.124798	38700000	0.0208265	2	0	-3.93708	2887	英洛华	15.48	D	10.21	1.35	0	0	3.92	0		master only (1)
807	2010	101000000	7326000000	6776000000	48887753	11890000000	7334000000	4555000000	云铝股份	1998-04-08	云南省	昆明市	呈贡区	1	1	C32	有色金属冶炼和压延加工业	0.0041119	0.616878	23.1989	12	1.08121		89800000	0.0122642	3	0	-3.60949	45	云铝股份	67.14	B	9.81	12.56	15	23	6.77	1	5300000	matched (3)
807	2011	96700000	8006000000	7187000000	120200000	14880000000	9898000000	4978000000	云铝股份	1998-04-08	云南省	昆明市	呈贡区	1	1	C32	有色金属冶炼和压延加工业	0.008078	0.66536	23.4231	13	1.1139	0.0928689	48300000	0.0060365	3	0	-3.63165	495	云铝股份	49.31	C	5.79	12.18	11	17	3.34	1	0	matched (3)
807	2012	96700000	10690000000	10080000000	28900925	18820000000	13820000000	5002000000	云铝股份	1998-04-08	云南省	昆明市	呈贡区	1	1	C32	有色金属冶炼和压延加工业	0.0015357	0.734207	23.6581	14	1.06127	0.335568	253000000	0.0236369	3	0	-3.64829	225	云铝股份	66.74	B	7.22	14.52	15	23	7	1		master only (1)
807	2013	97900000	14930000000	14250000000	-110200000	22970000000	17550000000	5417000000	云铝股份	1998-04-08	云南省	昆明市	呈贡区	1	1	C32	有色金属冶炼和压延加工业	-0.0047977	0.764156	23.8573	15	1.04767	0.396081	396000000	0.0265134	3	0	-3.66478	2747	云铝股份	13.38	D	6.24	4	0	0	3.14	1	60000	matched (3)
807	2014	146000000	19090000000	18280000000	-721400000	24410000000	19710000000	4699000000	云铝股份	1998-04-08	云南省	昆明市	呈贡区	1	1	C32	有色金属冶炼和压延加工业	-0.0295615	0.807475	23.9181	16	1.04444	0.278999	64900000	0.0034015	3	0	-3.69693	3229	云铝股份	7.68	D	2.57	1.49	0	0	3.62	1	0	matched (3)
807	2015	212000000	15850000000	14740000000	-438500000	29280000000	22640000000	6644000000	云铝股份	1998-04-08	云南省	昆明市	呈贡区	1	1	C32	有色金属冶炼和压延加工业	-0.0149765	0.773096	24.1002	17	1.07582	-0.169723	553000000	0.0348714	3	0	-3.7115	3329	云铝股份	3.17	D	5.67	1.42	0	0	-3.92	1	5803000	matched (3)
807	2016	222000000	15540000000	13340000000	206700000	31930000000	22060000000	9867000000	云铝股份	1998-04-08	云南省	昆明市	呈贡区	1	1	C32	有色金属冶炼和压延加工业	0.0064752	0.690959	24.1867	18	1.16505	-0.0194927	27100000	0.001744	3	0	-3.73841	3143	云铝股份	13.3	D	7.03	2.02	0	0	4.25	1	1195238	matched (3)
807	2017	363000000	22130000000	19250000000	716600000	35880000000	24940000000	10930000000	云铝股份	1998-04-08	云南省	昆明市	呈贡区	1	1	C32	有色金属冶炼和压延加工业	0.0199733	0.695278	24.3034	19	1.14985	0.42376	78600000	0.0035519	3	0	-3.75976	2699	云铝股份	17.09	D	13.41	1.71	0	0	1.97	1	2317982	matched (3)
815	2010	0	1165000000	1017000000	-115800000	3865000000	3012000000	852400000	美利云	1998-06-09	宁夏回族自治区	银川市	兴庆区			C22	造纸及纸制品业	-0.0299562	0.779438	22.0751	12	1.1462		158000000	0.135674	3	0	-3.63382	529	美利云	34.91	D	5.26	7.96	7	15	-0.31	1	560000	matched (3)
815	2011	0	1141000000	1076000000	-190500000	3905000000	3243000000	661900000	美利云	1998-06-09	宁夏回族自治区	银川市	兴庆区			C22	造纸及纸制品业	-0.0487712	0.830511	22.0856	13	1.0607	-0.0206166	10500000	0.0091915	3	0	-3.6741	690	美利云	29.87	D	-0.06	9	7	14	-0.07	1	1490000	matched (3)
815	2012	345000000	1363000000	1191000000	25166132	3135000000	2448000000	687100000	美利云	1998-06-09	宁夏回族自治区	银川市	兴庆区			C22	造纸及纸制品业	0.0080285	0.78081	21.8658	14	1.14427	0.19386	45900000	0.0336525	3	0	-3.70635	368	美利云	61.37	B	7.72	14	12	23	4.65	1	0	matched (3)
815	2013	345000000	553200000	571000000	-241400000	2472000000	2026000000	445900000	美利云	1998-06-09	宁夏回族自治区	银川市	兴庆区			C22	造纸及纸制品业	-0.0976332	0.819634	21.6284	15	0.968877	-0.594067	723738	0.0013083	3	0	-3.73333	652	美利云	36.16	D	-2.33	12.55	12	14	-0.06	1	310000	matched (3)
815	2014	0	622000000	640500000	-649100000	1506000000	1675000000	-169100000	美利云	1998-06-09	宁夏回族自治区	银川市	兴庆区			C22	造纸及纸制品业	-0.431028	1.11232	21.1327	16	0.971076	0.124421	617714	0.0009931	3	0	-3.73049	3385	美利云	1.27	D	-1.92	3.19	0	0	0	1	330000	matched (3)
815	2015	0	556700000	526500000	148100000	1407000000	1372000000	34861747	美利云	1998-06-09	宁夏回族自治区	银川市	兴庆区			C22	造纸及纸制品业	0.105249	0.975222	21.0647	17	1.05736	-0.104985	685714	0.0012317	3	0	-3.76297	263	美利云	48.96	C	10.5	12.46	12	14	0	1	250000	matched (3)
815	2016	71367.5	587400000	549600000	3.94583e+06	2865000000	868400000	1996000000	美利云	1998-06-09	宁夏回族自治区	银川市	兴庆区			C22	造纸及纸制品业	0.0013775	0.303169	21.7757	18	1.06865	0.0550579	91000000	0.15487	3	0	-3.86198	148	美利云	67.54	B	6.04	15	15	26.5	5	1	250000	matched (3)
815	2017	134871	841300000	719500000	25585402	2798000000	776400000	2021000000	美利云	1998-06-09	宁夏回族自治区	银川市	兴庆区			C22	造纸及纸制品业	0.0091452	0.277529	21.7521	19	1.16925	0.432321	2460221	0.0029243	3	0	-3.90072	3264	美利云	9.36	D	7.19	3.84	0	0	-1.67	1	250000	matched (3)
818	2010	46700000	1805000000	1895000000	1160000000	2711000000	856900000	1855000000	航锦科技	1997-10-17	辽宁省	葫芦岛市	连山区			C26	化学原料及化学制品制造业	0.427801	0.316034	21.7208	13	0.952644		10200000	0.0056509	1	1	-3.65897	2296	航锦科技	5.69	D	4.88	0.72	0	0	0.09	1		master only (1)
818	2011	47300000	2971000000	2699000000	121700000	2649000000	667400000	1981000000	航锦科技	1997-10-17	辽宁省	葫芦岛市	连山区			C26	化学原料及化学制品制造业	0.0459323	0.251955	21.6973	14	1.10065	0.645965	34700000	0.0116783	1	1	-3.69761	2458	航锦科技	8.93	D	8.43	1.3	0	0	-0.8	0	28571.4	matched (3)
818	2012	47400000	2684000000	2525000000	24568382	2715000000	680300000	2035000000	航锦科技	1997-10-17	辽宁省	葫芦岛市	连山区			C26	化学原料及化学制品制造业	0.0090492	0.250585	21.722	15	1.06264	-0.0966702	88400000	0.0329532	1	1	-3.73904	2628	航锦科技	8.59	D	5.98	2.18	0	0	0.43	0	4802968	matched (3)
818	2013	47400000	2653000000	2544000000	-93036646	2762000000	816500000	1945000000	航锦科技	1997-10-17	辽宁省	葫芦岛市	连山区			C26	化学原料及化学制品制造业	-0.0336906	0.295687	21.739	16	1.04297	-0.0112224	64300000	0.0242348	1	1	-3.78	2902	航锦科技	9.08	D	3.34	2.51	0	0	3.23	0	3197535	matched (3)
818	2014	47500000	2956000000	2592000000	88238081	2669000000	636000000	2033000000	航锦科技	1997-10-17	辽宁省	葫芦岛市	连山区			C26	化学原料及化学制品制造业	0.0330629	0.238306	21.7049	17	1.14047	0.114028	11400000	0.0038528	1	1	-3.81805	3075	航锦科技	12.07	D	8.27	2.26	0	0	1.54	0	9281625	matched (3)
818	2015	47500000	2582000000	2150000000	121200000	2576000000	419400000	2157000000	航锦科技	1997-10-17	辽宁省	葫芦岛市	连山区			C26	化学原料及化学制品制造业	0.0470327	0.162803	21.6696	18	1.20097	-0.126385	9139993	0.0035394	1	1	-3.85594	3094	航锦科技	12.06	D	9.7	1.23	0	0	1.13	0	3841625	matched (3)
818	2016	47700000	2606000000	2217000000	111500000	2666000000	346200000	2319000000	航锦科技	1997-10-17	辽宁省	葫芦岛市	连山区			C26	化学原料及化学制品制造业	0.0418437	0.129885	21.7037	19	1.17552	0.0089965	8211923	0.0031516	1	1	-3.89799	2996	航锦科技	15.11	D	14.3	0.84	0	0	-0.03	0	641625	matched (3)
818	2017	47700000	3401000000	2634000000	262200000	3802000000	1197000000	2605000000	航锦科技	1997-10-17	辽宁省	葫芦岛市	连山区			C26	化学原料及化学制品制造业	0.0689636	0.314749	22.0589	20	1.29126	0.305233	1944103	0.0005716	1	1	-3.95338	1724	航锦科技	22.35	D	17.25	1.98	0	0	3.12	0	641625	matched (3)
819	2010	0	1625000000	1494000000	34098310	583100000	79995355	503100000	岳阳兴长	1997-06-25	湖南省	岳阳市	云溪区			C25	石油加工、炼焦及核燃料加工业	0.0584824	0.137201	20.1838	13	1.08783		325000	0.0002	2	0	-3.46956	327	岳阳兴长	53.41	C	13.41	13	8	14	5	1		master only (1)
819	2011	0	1554000000	1439000000	39564904	597800000	60317141	537500000	岳阳兴长	1997-06-25	湖南省	岳阳市	云溪区			C25	石油加工、炼焦及核燃料加工业	0.0661805	0.100893	20.2088	14	1.08019	-0.0436234	135000	8.69e-05	2	0	-3.51427	234	岳阳兴长	63.15	B	16.65	12.5	15	14	5	1	0	matched (3)
819	2012	0	2026000000	1864000000	61579305	672200000	62586629	609600000	岳阳兴长	1997-06-25	湖南省	岳阳市	云溪区			C25	石油加工、炼焦及核燃料加工业	0.0916054	0.0931038	20.3261	15	1.08668	0.30348	0	0	2	0	-3.57563	241	岳阳兴长	66.18	B	19.62	9.56	15	17	5	1		master only (1)
819	2013	16500000	1925000000	1748000000	60141968	727600000	82419984	645200000	岳阳兴长	1997-06-25	湖南省	岳阳市	云溪区			C25	石油加工、炼焦及核燃料加工业	0.0826595	0.113279	20.4052	16	1.10094	-0.0499182	0	0	2	0	-3.62938	298	岳阳兴长	67.07	B	17.57	12.5	15	17	5	1		master only (1)
819	2014	16500000	1461000000	1341000000	36486002	776000000	105100000	671000000	岳阳兴长	1997-06-25	湖南省	岳阳市	云溪区			C25	石油加工、炼焦及核燃料加工业	0.0470151	0.135365	20.4697	17	1.08941	-0.240941	3500000	0.0023958	2	0	-3.68018	92	岳阳兴长	59.41	C	15.41	13	12	14	5	1		master only (1)
819	2015	16500000	1482000000	1323000000	47148260	818800000	108800000	710000000	岳阳兴长	1997-06-25	湖南省	岳阳市	云溪区			C25	石油加工、炼焦及核燃料加工业	0.057582	0.132886	20.5234	18	1.12038	0.0146813	390000	0.0002631	2	0	-3.72889	170	岳阳兴长	61.99	B	15.91	12.08	12	17	5	1		master only (1)
819	2016	16500000	1363000000	1207000000	11576304	827300000	114400000	713000000	岳阳兴长	1997-06-25	湖南省	岳阳市	云溪区			C25	石油加工、炼焦及核燃料加工业	0.0139925	0.138221	20.5337	19	1.12922	-0.0807529	314000	0.0002304	2	0	-3.77054	454	岳阳兴长	53.25	C	13.8	8.45	12	14	5	1		master only (1)
819	2017	16500000	1588000000	1456000000	-12577064	820000000	133800000	686100000	岳阳兴长	1997-06-25	湖南省	岳阳市	云溪区			C25	石油加工、炼焦及核燃料加工业	-0.0153387	0.163197	20.5248	20	1.09078	0.165459	0	0	2	0	-3.80911	3540	岳阳兴长	-2.64	E	-1.17	3.53	0	0	-5	1		master only (1)
822	2010	54100000	6923000000	5955000000	59965856	7112000000	3533000000	3579000000	山东海化	1998-07-03	山东省	潍坊市	寒亭区			C26	化学原料及化学制品制造业	0.008432	0.496765	22.685	12	1.16259		39600000	0.0057134	1	1	-3.6341	1850	山东海化	17.16	D	9.18	2.98	0	0	5	1	0	matched (3)
822	2011	54100000	7534000000	6258000000	372400000	6796000000	2833000000	3963000000	山东海化	1998-07-03	山东省	潍坊市	寒亭区			C26	化学原料及化学制品制造业	0.0547997	0.416892	22.6397	13	1.20389	0.0882354	28100000	0.0037318	1	1	-3.67518	1218	山东海化	23.27	D	15.59	2.88	0	0	4.8	1		master only (1)
822	2012	54100000	4943000000	4872000000	-542400000	5996000000	2674000000	3322000000	山东海化	1998-07-03	山东省	潍坊市	寒亭区			C26	化学原料及化学制品制造业	-0.0904617	0.445907	22.5144	14	1.01462	-0.343905	20900000	0.0042203	1	1	-3.71724	2675	山东海化	6.1	D	-2.25	3.49	0	0	4.86	1		master only (1)
822	2013	54900000	4315000000	4176000000	-1240000000	5434000000	3351000000	2083000000	山东海化	1998-07-03	山东省	潍坊市	寒亭区			C26	化学原料及化学制品制造业	-0.228233	0.616656	22.4159	15	1.03324	-0.127001	13600000	0.0031539	1	1	-3.75792	3094	山东海化	-1.28	E	-3.23	3.53	0	0	-1.58	1		master only (1)
822	2014	32300000	4856000000	4233000000	146500000	3859000000	1717000000	2143000000	山东海化	1998-07-03	山东省	潍坊市	寒亭区			C26	化学原料及化学制品制造业	0.0379685	0.444773	22.0738	16	1.14721	0.125381	8491526	0.0017485	1	1	-3.79379	2606	山东海化	16.53	D	8.9	3.62	0	0	4.01	1		master only (1)
822	2015	34200000	3523000000	2997000000	122200000	3714000000	1449000000	2265000000	山东海化	1998-07-03	山东省	潍坊市	寒亭区			C26	化学原料及化学制品制造业	0.0328927	0.390187	22.0354	17	1.17545	-0.274583	2583321	0.0007333	1	1	-3.8327	2725	山东海化	16.27	D	9.02	2.25	0	0	5	1	108333	matched (3)
822	2016	35300000	3361000000	2807000000	-123400000	3756000000	1614000000	2142000000	山东海化	1998-07-03	山东省	潍坊市	寒亭区			C26	化学原料及化学制品制造业	-0.0328635	0.429671	22.0465	18	1.19726	-0.0460281	2617721	0.0007789	1	1	-3.87302	3303	山东海化	9.28	D	4.62	2.09	0	0	2.57	1	108333	matched (3)
822	2017	18300000	4817000000	3660000000	657900000	4309000000	1507000000	2801000000	山东海化	1998-07-03	山东省	潍坊市	寒亭区			C26	化学原料及化学制品制造业	0.152708	0.349827	22.1839	19	1.31596	0.433317	2661304	0.0005525	1	1	-3.91621	2952	山东海化	14.86	D	12.76	1.8	0	0	0.3	1	115333	matched (3)
825	2010	326000000	87200000000	79460000000	1372000000	63600000000	40670000000	22940000000	太钢不锈	1998-10-21	山西省	太原市	尖草坪区			C31	黑色金属冶炼及压延加工业	0.0215701	0.639396	24.876	12	1.09742		37500000	0.0004299	2	0	-3.37121	103	太钢不锈	62.72	B	11.7	12.94	10	27	1.08	1	5450000	matched (3)
825	2011	327000000	96220000000	87980000000	1789000000	65810000000	40750000000	25060000000	太钢不锈	1998-10-21	山西省	太原市	尖草坪区			C31	黑色金属冶炼及压延加工业	0.0271896	0.619247	24.9101	13	1.09371	0.103471	48900000	0.0005082	2	0	-3.40385	464	太钢不锈	51.41	C	14.92	11.26	11	14	0.23	1	5450000	matched (3)
825	2012	327000000	103500000000	95830000000	998600000	69470000000	43560000000	25900000000	太钢不锈	1998-10-21	山西省	太原市	尖草坪区			C31	黑色金属冶炼及压延加工业	0.0143758	0.627114	24.9641	14	1.08021	0.0758159	64700000	0.0006249	2	0	-3.43199	315	太钢不锈	63.15	B	15.41	9.68	15	23	0.06	1	4162700	matched (3)
825	2013	339000000	105000000000	98360000000	499200000	75810000000	49670000000	26140000000	太钢不锈	1998-10-21	山西省	太原市	尖草坪区			C31	黑色金属冶炼及压延加工业	0.0065845	0.655236	25.0515	15	1.0677	0.0145393	67900000	0.0006467	2	0	-3.45228	465	太钢不锈	60.64	B	14.65	10.76	15	20	0.23	1	2899225	matched (3)
825	2014	233000000	86770000000	80010000000	277600000	76310000000	50350000000	25950000000	太钢不锈	1998-10-21	山西省	太原市	尖草坪区			C31	黑色金属冶炼及压延加工业	0.0036382	0.659902	25.058	16	1.08447	-0.173813	48000000	0.0005533	2	0	-3.49079	3174	太钢不锈	9.72	D	7.65	0.41	0	0	1.66	1	2898324	matched (3)
825	2015	256000000	67910000000	64690000000	-3826000000	72450000000	50360000000	22090000000	太钢不锈	1998-10-21	山西省	太原市	尖草坪区			C31	黑色金属冶炼及压延加工业	-0.0528148	0.695064	25.0061	17	1.04977	-0.217293	53900000	0.000793	2	0	-3.5426	272	太钢不锈	42.53	C	1.73	9.39	12	20	-0.59	1	2894100	matched (3)
825	2016	239000000	56740000000	48440000000	1022000000	72590000000	49460000000	23130000000	太钢不锈	1998-10-21	山西省	太原市	尖草坪区			C31	黑色金属冶炼及压延加工业	0.0140767	0.681353	25.0081	18	1.17139	-0.164542	52400000	0.0009233	2	0	-3.58217	3269	太钢不锈	10.78	D	10.1	0.41	0	0	0.27	1		master only (1)
825	2017	291000000	67790000000	56730000000	4369000000	74500000000	47160000000	27340000000	太钢不锈	1998-10-21	山西省	太原市	尖草坪区			C31	黑色金属冶炼及压延加工业	0.058642	0.633015	25.034	19	1.19493	0.194782	55900000	0.0008246	2	0	-3.61628	1827	太钢不锈	21.83	D	21.4	0.35	0	0	0.08	1	0	matched (3)
830	2010	26000000	7686000000	6840000000	211800000	11280000000	8692000000	2590000000	鲁西化工	1998-08-07	山东省	聊城市	聊城市			C26	化学原料及化学制品制造业	0.0187757	0.770432	23.1465	12	1.12371		95100000	0.012378	1	1	-3.61304	1909	鲁西化工	16.62	D	10.96	0.66	0	0	5	1	15954.4	matched (3)
830	2011	30000000	9316000000	7965000000	423400000	13170000000	8067000000	5107000000	鲁西化工	1998-08-07	山东省	聊城市	聊城市			C26	化学原料及化学制品制造业	0.032142	0.612337	23.3015	13	1.16974	0.212169	26500000	0.0028439	1	1	-3.64186	1629	鲁西化工	20.09	D	14.48	0.62	0	0	4.99	1		master only (1)
830	2012	31100000	10240000000	8985000000	338500000	15920000000	10620000000	5304000000	鲁西化工	1998-08-07	山东省	聊城市	聊城市			C26	化学原料及化学制品制造业	0.0212589	0.666945	23.4911	14	1.13978	0.0992189	39300000	0.0038351	1	1	-3.66538	2420	鲁西化工	14.45	D	9.66	0.87	0	0	3.92	1		master only (1)
830	2013	37500000	11060000000	9573000000	305900000	17880000000	12270000000	5611000000	鲁西化工	1998-08-07	山东省	聊城市	聊城市			C26	化学原料及化学制品制造业	0.0171087	0.686178	23.607	15	1.15493	0.0796412	24600000	0.002222	1	1	-3.69378	2743	鲁西化工	13.46	D	9.17	0.71	0	0	3.58	1		master only (1)
830	2014	39500000	13030000000	11080000000	361100000	19860000000	13890000000	5975000000	鲁西化工	1998-08-07	山东省	聊城市	聊城市			C26	化学原料及化学制品制造业	0.0181789	0.699157	23.7121	16	1.17563	0.178446	38000000	0.0029139	1	1	-3.72226	1296	鲁西化工	22.53	D	17.17	0.6	0	0	4.76	1		master only (1)
830	2015	78800000	12870000000	10970000000	289300000	22370000000	14400000000	7963000000	鲁西化工	1998-08-07	山东省	聊城市	聊城市			C26	化学原料及化学制品制造业	0.012935	0.643975	23.8308	17	1.17376	-0.0121633	60500000	0.0046971	1	1	-3.7481	2944	鲁西化工	14.11	D	8.61	0.6	0	0	4.9	1		master only (1)
830	2016	80900000	10950000000	9232000000	252600000	25060000000	16420000000	8641000000	鲁西化工	1998-08-07	山东省	聊城市	聊城市			C26	化学原料及化学制品制造业	0.0100779	0.655232	23.9447	18	1.18598	-0.149356	40400000	0.0036858	1	1	-3.77339	3188	鲁西化工	12.5	D	8.34	0.55	0	0	3.61	1	2160000	matched (3)
830	2017	82200000	15760000000	11650000000	1950000000	27770000000	17280000000	10490000000	鲁西化工	1998-08-07	山东省	聊城市	聊城市			C26	化学原料及化学制品制造业	0.0702044	0.622247	24.0474	19	1.35247	0.439624	26100000	0.0016559	1	1	-3.79917	992	鲁西化工	25.88	D	21.42	0.54	0	0	3.92	1	0	matched (3)
831	2010	1222729	2759000000	2671000000	-219300000	2112000000	2098000000	13874553	五矿稀土	1998-09-11	山西省	运城市	夏县			C32	有色金属冶炼和压延加工业	-0.10382	0.993431	21.471	12	1.03295		4010681	0.0014535	2	0	-3.60202	2320	五矿稀土	4.04	D	1.17	3.29	0	0	-0.42	1	300000	matched (3)
831	2011	1357447	7636000000	5910000000	1026000000	4603000000	2455000000	2148000000	五矿稀土	1998-09-11	山西省	运城市	夏县			C32	有色金属冶炼和压延加工业	0.222804	0.533313	22.2499	13	1.29211	1.76744	16700000	0.0021903	2	0	-3.67717	2186	五矿稀土	15.6	D	7.22	3.38	0	0	5	1	0	matched (3)
831	2012	7258177	4018000000	3249000000	266300000	2780000000	581500000	2199000000	五矿稀土	1998-09-11	山西省	运城市	夏县			C32	有色金属冶炼和压延加工业	0.095792	0.20916	21.7458	14	1.2367	-0.473775	29600000	0.0073783	2	0	-3.70037	1725	五矿稀土	20.51	D	14.43	1.08	0	0	5	1		master only (1)
831	2013	7400050	1705000000	1293000000	224200000	2884000000	237200000	2647000000	五矿稀土	1998-09-11	山西省	运城市	夏县			C32	有色金属冶炼和压延加工业	0.0777438	0.0822408	21.7824	15	1.31889	-0.575593	13700000	0.0080209	2	0	-3.74233	511	五矿稀土	58.61	C	14.84	10.2	12	17	4.57	1		master only (1)
831	2014	10100000	701900000	613800000	-63024472	2615000000	40816542	2574000000	五矿稀土	1998-09-11	山西省	运城市	夏县			C32	有色金属冶炼和压延加工业	-0.0241028	0.0156097	21.6845	16	1.14352	-0.588432	17900000	0.0255327	2	0	-3.77684	3185	五矿稀土	9.41	D	4.25	1.46	0	0	3.7	1		master only (1)
831	2015	10100000	459200000	369600000	-411600000	2237000000	68908211	2168000000	五矿稀土	1998-09-11	山西省	运城市	夏县			C32	有色金属冶炼和压延加工业	-0.183997	0.0308064	21.5283	17	1.24243	-0.345832	26900000	0.0585964	2	0	-3.80638	3393	五矿稀土	1.79	D	-1.11	1.27	0	0	1.63	1		master only (1)
831	2016	10100000	447700000	388300000	17081766	2179000000	114000000	2065000000	五矿稀土	1998-09-11	山西省	运城市	夏县			C32	有色金属冶炼和压延加工业	0.0078399	0.0523254	21.5021	18	1.15318	-0.0248733	3414015	0.007625	2	0	-3.84442	2757	五矿稀土	17.14	D	9.99	2.15	0	0	5	1		master only (1)
831	2017	10100000	715900000	631800000	32155512	2176000000	76604991	2099000000	五矿稀土	1998-09-11	山西省	运城市	夏县			C32	有色金属冶炼和压延加工业	0.0147804	0.0352119	21.5006	19	1.13312	0.598875	16600000	0.0232096	2	0	-3.8843	2840	五矿稀土	15.94	D	8.65	2.56	0	0	4.73	1		master only (1)
833	2010	0	1350000000	1095000000	91629864	1389000000	562900000	825900000	粤桂股份	1998-11-11	广西壮族自治区	贵港市	港北区			C22	造纸及纸制品业	0.0659764	0.405332	21.0517	12	1.2324		16900000	0.012528	3	0	-3.56149	1437	粤桂股份	19.94	D	13.05	3.05	0	0	3.84	0	5220000	matched (3)
833	2011	0	1321000000	1110000000	53708202	1352000000	410000000	942300000	粤桂股份	1998-11-11	广西壮族自治区	贵港市	港北区			C22	造纸及纸制品业	0.0397166	0.303191	21.0251	13	1.19037	-0.0210117	52500000	0.0397536	3	0	-3.5984	1488	粤桂股份	21.18	D	13.37	2.81	0	0	5	1	0	matched (3)
833	2012	0	1095000000	962800000	14018912	1308000000	381000000	926700000	粤桂股份	1998-11-11	广西壮族自治区	贵港市	港北区			C22	造纸及纸制品业	0.0107207	0.291327	20.9915	14	1.13755	-0.171189	8062268	0.0073616	3	0	-3.63443	2685	粤桂股份	5.45	D	7.73	2.72	0	0	-5	1	4658366	matched (3)
833	2013	0	1108000000	1020000000	-106100000	1106000000	285800000	820600000	粤桂股份	1998-11-11	广西壮族自治区	贵港市	港北区			C22	造纸及纸制品业	-0.0959268	0.258289	20.8243	15	1.0864	0.0114734	2517583	0.0022727	3	0	-3.65318	2980	粤桂股份	4.91	D	0.48	4	0	0	0.43	1	400000	matched (3)
833	2014	535265	1055000000	938200000	28145881	1240000000	391600000	848700000	粤桂股份	1998-11-11	广西壮族自治区	贵港市	港北区			C22	造纸及纸制品业	0.0226919	0.315745	20.9387	16	1.12422	-0.0478685	24800000	0.0235417	3	0	-3.70797	2852	粤桂股份	14.57	D	7.6	1.97	0	0	5	1	600000	matched (3)
833	2015	251000000	1735000000	1345000000	134500000	3406000000	768400000	2637000000	粤桂股份	1998-11-11	广西壮族自治区	贵港市	港北区			C22	造纸及纸制品业	0.0394964	0.225619	21.9487	17	1.28979	0.645369	21300000	0.0122476	3	0	-3.82976	1885	粤桂股份	20.23	D	13.99	2.46	0	0	3.78	1	542608	matched (3)
833	2016	259000000	1792000000	1543000000	38738134	3419000000	787000000	2632000000	粤桂股份	1998-11-11	广西壮族自治区	贵港市	港北区			C22	造纸及纸制品业	0.0113297	0.230165	21.9527	18	1.16145	0.0326807	52800000	0.0294843	3	0	-3.86991	3393	粤桂股份	5.07	D	0.17	1.16	0	0	3.74	1	419590	matched (3)
833	2017	313000000	1907000000	1600000000	80232221	3381000000	652700000	2728000000	粤桂股份	1998-11-11	广西壮族自治区	贵港市	港北区			C22	造纸及纸制品业	0.0237334	0.193061	21.9413	19	1.19196	0.0643102	36100000	0.0189171	3	0	-3.90948	2640	粤桂股份	17.51	D	11.85	1	0	0	4.66	1	410000	matched (3)
850	2010	943917	1956000000	1644000000	366700000	6907000000	2935000000	3971000000	华茂股份	1998-10-07	安徽省	安庆市	安庆市			C17	纺织业	0.0530933	0.425013	22.6557	12	1.18993		32700000	0.0167376	2	0	-3.63481	929	华茂股份	23.31	D	15.26	0.05	0	0	8	1	7500000	matched (3)
850	2011	1116920	2433000000	2209000000	297000000	6347000000	3876000000	2471000000	华茂股份	1998-10-07	安徽省	安庆市	安庆市			C17	纺织业	0.0467905	0.610654	22.5712	13	1.10185	0.244255	16900000	0.0069572	2	0	-3.67647	1105	华茂股份	24.3	D	15.18	0.05	0	0	9.07	1		master only (1)
850	2012	427000000	2059000000	2050000000	332300000	6683000000	3242000000	3442000000	华茂股份	1998-10-07	安徽省	安庆市	安庆市			C17	纺织业	0.0497239	0.485021	22.6229	14	1.00455	-0.153773	171000000	0.0828855	2	0	-3.71553	1406	华茂股份	22.88	D	16.62	0.22	0	0	6.04	1		master only (1)
850	2013	427000000	2058000000	1905000000	175600000	6166000000	2963000000	3203000000	华茂股份	1998-10-07	安徽省	安庆市	安庆市			C17	纺织业	0.0284823	0.480609	22.5423	15	1.08063	-0.0004801	59500000	0.0289282	2	0	-3.7569	1803	华茂股份	20.26	D	14.18	0.22	0	0	5.86	1		master only (1)
850	2014	428000000	1982000000	1882000000	357000000	6678000000	2718000000	3960000000	华茂股份	1998-10-07	安徽省	安庆市	安庆市			C17	纺织业	0.0534559	0.40699	22.622	16	1.05299	-0.037136	56100000	0.0283212	2	0	-3.79555	1065	华茂股份	23.91	D	16.91	0.27	0	0	6.73	1		master only (1)
850	2015	442000000	1930000000	1786000000	44852167	8572000000	3142000000	5430000000	华茂股份	1998-10-07	安徽省	安庆市	安庆市			C17	纺织业	0.0052326	0.366515	22.8717	17	1.08098	-0.0259202	33600000	0.017379	2	0	-3.82778	1056	华茂股份	24.67	D	14.37	0.3	0	0	10	1		master only (1)
850	2016	446000000	1966000000	1789000000	64611852	7795000000	3036000000	4759000000	华茂股份	1998-10-07	安徽省	安庆市	安庆市			C17	纺织业	0.0082884	0.389474	22.7768	18	1.09887	0.0181394	40900000	0.0208292	2	0	-3.87137	1642	华茂股份	23.04	D	12.74	0.3	0	0	10	1		master only (1)
850	2017	446000000	2343000000	2085000000	82714070	7872000000	3204000000	4668000000	华茂股份	1998-10-07	安徽省	安庆市	安庆市			C17	纺织业	0.0105074	0.406967	22.7866	19	1.12387	0.191992	61700000	0.0263409	2	0	-3.91104	2014	华茂股份	20.93	D	12.06	0.25	0	0	8.62	1		master only (1)
859	2010	1048487	1453000000	1271000000	42305959	1477000000	553100000	923500000	国风塑业	1998-11-19	安徽省	合肥市	蜀山区			C29	橡胶和塑料制品业	0.0286507	0.374606	21.113	12	1.1428		2687161	0.0018497	2	0	-3.56836	1918	国风塑业	16.5	D	9.83	1.67	0	0	5	1	192945	matched (3)
859	2011	1153932	1765000000	1539000000	22399593	1476000000	551600000	924800000	国风塑业	1998-11-19	安徽省	合肥市	蜀山区			C29	橡胶和塑料制品业	0.0151717	0.373586	21.1129	13	1.14746	0.215244	7325423	0.0041493	2	0	-3.60834	2318	国风塑业	13.39	D	7.12	1.27	0	0	5	1	192945	matched (3)
859	2012	465932	1429000000	1295000000	4.74049e+06	1325000000	395600000	929600000	国风塑业	1998-11-19	安徽省	合肥市	蜀山区			C29	橡胶和塑料制品业	0.0035771	0.298543	21.0048	14	1.10347	-0.190487	7530193	0.005269	2	0	-3.63602	2740	国风塑业	2.35	D	6.27	1.08	0	0	-5	1	230190	matched (3)
859	2013	524051	1361000000	1254000000	-39189112	1429000000	538700000	890400000	国风塑业	1998-11-19	安徽省	合肥市	蜀山区			C29	橡胶和塑料制品业	-0.0274233	0.376932	21.0803	15	1.08495	-0.0479557	7001336	0.0051457	2	0	-3.68473	2946	国风塑业	6.7	D	4.15	1.1	0	0	1.45	1	229493	matched (3)
859	2014	524051	1312000000	1195000000	6.24544e+06	1917000000	527500000	1389000000	国风塑业	1998-11-19	安徽省	合肥市	蜀山区			C29	橡胶和塑料制品业	0.0032585	0.275241	21.3738	16	1.09754	-0.035898	23300000	0.0177819	2	0	-3.75397	3211	国风塑业	8.34	D	6.69	1.43	0	0	0.22	1	441660	matched (3)
859	2015	24500000	1090000000	994200000	4.18053e+06	1938000000	473000000	1465000000	国风塑业	1998-11-19	安徽省	合肥市	蜀山区			C29	橡胶和塑料制品业	0.002157	0.244062	21.385	17	1.09668	-0.16885	26700000	0.0245169	2	0	-3.79493	3219	国风塑业	8.22	D	6.43	1.47	0	0	0.32	1		master only (1)
859	2016	24600000	1145000000	1026000000	8.90792e+06	2089000000	614900000	1474000000	国风塑业	1998-11-19	安徽省	合肥市	蜀山区			C29	橡胶和塑料制品业	0.0042645	0.294365	21.4599	18	1.11597	0.0500208	18700000	0.0163186	2	0	-3.84114	3379	国风塑业	5.66	D	4.11	1.41	0	0	0.14	1		master only (1)
859	2017	25500000	1173000000	1054000000	42476909	2147000000	637800000	1509000000	国风塑业	1998-11-19	安徽省	合肥市	蜀山区			C29	橡胶和塑料制品业	0.0197852	0.2971	21.4873	19	1.11341	0.0247236	10800000	0.0092176	2	0	-3.88328	3047	国风塑业	13.91	D	12.82	1.16	0	0	-0.07	1	573143	matched (3)
862	2010	39900000	1024000000	774500000	41217639	3703000000	3177000000	525100000	银星能源	1998-09-15	宁夏回族自治区	银川市	西夏区			D44	电力、热力生产和供应业	0.0111323	0.858165	22.0323	12	1.32196		29400000	0.028679	3	0	-3.6326	2202	银星能源	10.83	D	9.19	1.36	0	0	0.28	1		master only (1)
862	2011	53700000	1584000000	1241000000	73856539	5208000000	4539000000	669300000	银星能源	1998-09-15	宁夏回族自治区	银川市	西夏区			D44	电力、热力生产和供应业	0.014181	0.871494	22.3735	13	1.27629	0.547115	21100000	0.0133226	3	0	-3.67795	2464	银星能源	8.6	D	8.22	1.15	0	0	-0.77	1		master only (1)
862	2012	42400000	942300000	773300000	-18480611	5107000000	4602000000	505100000	银星能源	1998-09-15	宁夏回族自治区	银川市	西夏区			D44	电力、热力生产和供应业	-0.0036186	0.901108	22.3539	14	1.21849	-0.40512	18500000	0.0195876	3	0	-3.71792	2781	银星能源	-0.01	E	4.08	0.91	0	0	-5	1		master only (1)
862	2013	41400000	925700000	703200000	-144600000	4759000000	4414000000	345500000	银星能源	1998-09-15	宁夏回族自治区	银川市	西夏区			D44	电力、热力生产和供应业	-0.0303753	0.927414	22.2833	15	1.31634	-0.0175498	31600000	0.0340974	3	0	-3.75751	3084	银星能源	-0.7	E	-1.54	0.79	0	0	0.05	1		master only (1)
862	2014	43000000	1438000000	885800000	28583295	9528000000	7665000000	1864000000	银星能源	1998-09-15	宁夏回族自治区	银川市	西夏区			D44	电力、热力生产和供应业	0.0029999	0.804407	22.9775	16	1.62393	0.553902	43900000	0.0305269	3	0	-3.78288	3121	银星能源	11.36	D	6.65	0.77	0	0	3.94	1		master only (1)
862	2015	43000000	1205000000	827700000	-123000000	9362000000	7636000000	1726000000	银星能源	1998-09-15	宁夏回族自治区	银川市	西夏区			D44	电力、热力生产和供应业	-0.0131435	0.815679	22.9599	17	1.45606	-0.162183	45000000	0.0373355	3	0	-3.82376	3308	银星能源	3.96	D	1.95	1.61	0	0	0.4	1		master only (1)
862	2016	41900000	1443000000	1020000000	18101803	10020000000	7080000000	2935000000	银星能源	1998-09-15	宁夏回族自治区	银川市	西夏区			D44	电力、热力生产和供应业	0.0018075	0.706951	23.0274	18	1.41486	0.196969	42100000	0.0291624	3	0	-3.86023	3256	银星能源	11.25	D	6.58	1.42	0	0	3.25	1		master only (1)
862	2017	43100000	935000000	648100000	-196700000	9179000000	6449000000	2729000000	银星能源	1998-09-15	宁夏回族自治区	银川市	西夏区			D44	电力、热力生产和供应业	-0.0214284	0.702639	22.9402	19	1.44275	-0.351817	19500000	0.0208982	3	0	-3.90472	3365	银星能源	4.55	D	1.27	3.49	0	0	-0.21	1		master only (1)
875	2010	2771152	2537000000	2315000000	36902230	14230000000	11680000000	2548000000	吉电股份	2002-09-26	吉林省	长春市	南关区			D44	电力、热力生产和供应业	0.0025941	0.820904	23.3783	8	1.09556		82300000	0.0324406	2	0	-3.43556	1508	吉电股份	19.64	D	8.1	1.54	0	0	10	1		master only (1)
875	2011	4094600	4557000000	3960000000	36112787	17110000000	14140000000	2967000000	吉电股份	2002-09-26	吉林省	长春市	南关区			D44	电力、热力生产和供应业	0.0021108	0.826577	23.5628	9	1.15097	0.796649	29500000	0.0064637	2	0	-3.45833	2413	吉电股份	11	D	6.36	0.89	0	0	3.75	1		master only (1)
875	2012	6320532	4384000000	4078000000	-470000000	15970000000	13470000000	2501000000	吉电股份	2002-09-26	吉林省	长春市	南关区			D44	电力、热力生产和供应业	-0.0294263	0.843386	23.4941	10	1.07507	-0.0381003	28200000	0.006432	2	0	-3.50509	2788	吉电股份	-0.3	E	-0.41	0.88	0	0	-0.77	1	45000	matched (3)
875	2013	6494098	4347000000	3596000000	21884237	18290000000	13980000000	4302000000	吉电股份	2002-09-26	吉林省	长春市	南关区			D44	电力、热力生产和供应业	0.0011968	0.764724	23.6294	11	1.20875	-0.0083803	60100000	0.0138253	2	0	-3.5314	2884	吉电股份	10.21	D	6.48	0.64	0	0	3.09	1	870000	matched (3)
875	2014	17500000	4753000000	3706000000	60787276	20320000000	15760000000	4558000000	吉电股份	2002-09-26	吉林省	长春市	南关区			D44	电力、热力生产和供应业	0.0029918	0.775653	23.7348	12	1.28266	0.0933903	40800000	0.008592	2	0	-3.55965	2741	吉电股份	15.5	D	6.68	0.32	0	0	8.5	1	395832	matched (3)
875	2015	25100000	4302000000	3402000000	146500000	22870000000	18120000000	4752000000	吉电股份	2002-09-26	吉林省	长春市	南关区			D44	电力、热力生产和供应业	0.0064035	0.792261	23.8532	13	1.26456	-0.094873	52000000	0.0120982	2	0	-3.5853	3142	吉电股份	11.11	D	6.98	0.18	0	0	3.95	1	18200000	matched (3)
875	2016	33500000	4405000000	3518000000	27026434	30070000000	21470000000	8600000000	吉电股份	2002-09-26	吉林省	长春市	南关区			D44	电力、热力生产和供应业	0.0008987	0.714043	24.1269	14	1.25205	0.0238264	30900000	0.0070212	2	0	-3.58753	2851	吉电股份	16.49	D	6.34	0.15	0	0	10	1	2584793	matched (3)
875	2017	45000000	5103000000	4541000000	-294600000	35180000000	26710000000	8472000000	吉电股份	2002-09-26	吉林省	长春市	南关区			D44	电力、热力生产和供应业	-0.0083751	0.759198	24.2838	15	1.12372	0.158498	21800000	0.0042644	2	0	-3.60297	3458	吉电股份	0.18	D	4.1	0.18	0	0	-4.1	1	421493	matched (3)
877	2010	127000000	5705000000	4056000000	675400000	10360000000	6085000000	4275000000	天山股份	1999-01-07	新疆维吾尔自治区	乌鲁木齐市	达坂城区			C30	非金属矿物制品业	0.0651892	0.587359	23.0612	11	1.40638		181000000	0.0317485	3	0	-3.57831	1146	天山股份	21.65	D	15.25	4	0	0	2.4	1	2010000	matched (3)
877	2011	151000000	8278000000	5560000000	1404000000	15340000000	9938000000	5402000000	天山股份	1999-01-07	新疆维吾尔自治区	乌鲁木齐市	达坂城区			C30	非金属矿物制品业	0.0915298	0.647857	23.4537	12	1.48888	0.451026	296000000	0.0357519	3	0	-3.58887	13	天山股份	80.05	A	23.31	15	15	20	6.74	1	0	matched (3)
877	2012	171000000	7699000000	6135000000	481900000	19160000000	11560000000	7595000000	天山股份	1999-01-07	新疆维吾尔自治区	乌鲁木齐市	达坂城区			C30	非金属矿物制品业	0.0251579	0.603513	23.6759	13	1.25488	-0.0698989	339000000	0.0440035	3	0	-3.60633	161	天山股份	69.44	B	15.37	14.51	15	20	4.56	1	960000	matched (3)
877	2013	222000000	7911000000	6225000000	381600000	21330000000	13410000000	7924000000	天山股份	1999-01-07	新疆维吾尔自治区	乌鲁木齐市	达坂城区			C30	非金属矿物制品业	0.0178914	0.628498	23.7833	14	1.27079	0.0275044	337000000	0.0426554	3	0	-3.63391	335	天山股份	65.7	B	14.89	13.19	15	20	2.62	1	2010000	matched (3)
877	2014	245000000	6544000000	5198000000	254800000	21630000000	13540000000	8085000000	天山股份	1999-01-07	新疆维吾尔自治区	乌鲁木齐市	达坂城区			C30	非金属矿物制品业	0.011781	0.626193	23.7972	15	1.25893	-0.172845	252000000	0.0385119	3	0	-3.67223	2420	天山股份	17.41	D	12.4	1.61	0	0	3.4	1	6353000	matched (3)
877	2015	281000000	5047000000	4383000000	-669700000	20530000000	13100000000	7434000000	天山股份	1999-01-07	新疆维吾尔自治区	乌鲁木齐市	达坂城区			C30	非金属矿物制品业	-0.0326221	0.637895	23.7452	16	1.1513	-0.228762	146000000	0.0289396	3	0	-3.71844	3391	天山股份	1.82	D	0.96	0.93	0	0	-0.07	1	2130000	matched (3)
877	2016	365000000	5001000000	3924000000	18994904	18470000000	11690000000	6780000000	天山股份	1999-01-07	新疆维吾尔自治区	乌鲁木齐市	达坂城区			C30	非金属矿物制品业	0.0010283	0.632939	23.6395	17	1.2745	-0.0089937	89300000	0.0178532	3	0	-3.77031	3008	天山股份	15	D	8.44	1.56	0	0	5	1	119990	matched (3)
877	2017	370000000	7080000000	5027000000	281500000	18470000000	10200000000	8267000000	天山股份	1999-01-07	新疆维吾尔自治区	乌鲁木齐市	达坂城区			C30	非金属矿物制品业	0.015246	0.552349	23.6392	18	1.40848	0.415598	115000000	0.0162011	3	0	-3.81035	2310	天山股份	19.47	D	11.77	3.26	0	0	4.44	1	290667	matched (3)
878	2010	878000000	31710000000	29230000000	578200000	32230000000	26950000000	5281000000	云南铜业	1998-06-02	云南省	昆明市	五华区	1	1	C32	有色金属冶炼和压延加工业	0.0179432	0.836132	24.196	12	1.08508		37900000	0.0011939	3	0	-3.49697	363	云南铜业	51.96	C	11.7	12.54	8	17	2.72	1	400000	matched (3)
878	2011	1130000000	35240000000	31210000000	836700000	30560000000	22420000000	8143000000	云南铜业	1998-06-02	云南省	昆明市	五华区	1	1	C32	有色金属冶炼和压延加工业	0.0273787	0.733561	24.143	13	1.12929	0.11133	83800000	0.0023785	3	0	-3.5451	322	云南铜业	58.72	C	10.63	9.93	13	17	8.16	1	1250000	matched (3)
878	2012	832000000	40830000000	37950000000	131100000	31770000000	23610000000	8164000000	云南铜业	1998-06-02	云南省	昆明市	五华区	1	1	C32	有色金属冶炼和压延加工业	0.0041278	0.743027	24.1818	14	1.07573	0.158401	130000000	0.0031898	3	0	-3.57918	2493	云南铜业	13.23	D	6.85	1.38	0	0	5	1	800000	matched (3)
878	2013	846000000	50100000000	49560000000	-1420000000	26590000000	19900000000	6694000000	云南铜业	1998-06-02	云南省	昆明市	五华区	1	1	C32	有色金属冶炼和压延加工业	-0.053407	0.748262	24.0038	15	1.0109	0.227171	134000000	0.0026839	3	0	-3.64532	3042	云南铜业	1.32	D	0.21	1.52	0	0	-0.41	1	3062500	matched (3)
878	2014	780000000	62400000000	60130000000	129200000	24870000000	18060000000	6810000000	云南铜业	1998-06-02	云南省	昆明市	五华区	1	1	C32	有色金属冶炼和压延加工业	0.0051951	0.726197	23.937	16	1.03783	0.245591	52000000	0.0008339	3	0	-3.69443	3003	云南铜业	12.93	D	6.51	1.42	0	0	5	1	6843300	matched (3)
878	2015	859000000	56660000000	55010000000	64256073	23310000000	17000000000	6312000000	云南铜业	1998-06-02	云南省	昆明市	五华区	1	1	C32	有色金属冶炼和压延加工业	0.0027567	0.729198	23.8721	17	1.02993	-0.0921234	229000000	0.0040392	3	0	-3.7429	3118	云南铜业	11.74	D	6.24	0.5	0	0	5	1	1133333	matched (3)
878	2016	879000000	59190000000	57180000000	174400000	23050000000	16430000000	6617000000	云南铜业	1998-06-02	云南省	昆明市	五华区	1	1	C32	有色金属冶炼和压延加工业	0.0075678	0.712887	23.8608	18	1.03519	0.0448194	80800000	0.0013655	3	0	-3.78434	3251	云南铜业	11.37	D	7.33	0.5	0	0	3.54	1	685952	matched (3)
878	2017	801000000	57010000000	54790000000	372200000	31880000000	22400000000	9476000000	云南铜业	1998-06-02	云南省	昆明市	五华区	1	1	C32	有色金属冶炼和压延加工业	0.0116764	0.702741	24.1852	19	1.04052	-0.0369645	148000000	0.0025978	3	0	-3.77865	3152	云南铜业	12.39	D	7.62	0.16	0	0	4.61	1	9957982	matched (3)
881	2010	2198140	1742000000	1191000000	291300000	4821000000	2965000000	1856000000	中广核技	1998-09-02	辽宁省	大连市	西岗区	2	2	C26	化学原料及化学制品制造业	0.060414	0.61502	22.2962	12	1.46214		3409200	0.0019576	1	1	-3.63762	218	中广核技	57.66	C	16.62	12.5	7	20	1.54	1		master only (1)
881	2011	1705340	1722000000	1237000000	286400000	6350000000	4347000000	2003000000	中广核技	1998-09-02	辽宁省	大连市	西岗区	2	2	C26	化学原料及化学制品制造业	0.0451034	0.684538	22.5718	13	1.39218	-0.0111331	5286300	0.0030695	1	1	-3.67646	479	中广核技	50.37	C	18.91	11.5	7	6	6.96	1		master only (1)
881	2012	1705340	2665000000	2044000000	256300000	6136000000	3924000000	2212000000	中广核技	1998-09-02	辽宁省	大连市	西岗区	2	2	C26	化学原料及化学制品制造业	0.0417649	0.639533	22.5374	14	1.30355	0.547477	11100000	0.0041574	1	1	-3.71697	458	中广核技	58.28	C	17.87	12.5	7	17	3.91	0		master only (1)
881	2013	1777340	1998000000	1563000000	114400000	6131000000	3896000000	2236000000	中广核技	1998-09-02	辽宁省	大连市	西岗区	2	2	C26	化学原料及化学制品制造业	0.0186557	0.63535	22.5367	15	1.27822	-0.250422	52500000	0.0262809	1	1	-3.75697	434	中广核技	61.56	B	15.45	12.38	12	17	4.73	0		master only (1)
881	2014	1813340	2030000000	1625000000	103100000	6037000000	3757000000	2280000000	中广核技	1998-09-02	辽宁省	大连市	西岗区	2	2	C26	化学原料及化学制品制造业	0.0170726	0.622324	22.5211	16	1.249	0.0160214	32600000	0.0160574	1	1	-3.79717	2680	中广核技	16	D	9.46	4	0	0	2.54	0		master only (1)
881	2015	1272360	2100000000	1857000000	-1281000000	4925000000	3970000000	955500000	中广核技	1998-09-02	辽宁省	大连市	西岗区	2	2	C26	化学原料及化学制品制造业	-0.260086	0.805987	22.3176	17	1.13107	0.0347138	78300000	0.0372939	1	1	-3.83776	266	中广核技	46.95	C	-1.32	13	15	20	0.27	0		master only (1)
881	2016	123000000	3023000000	2400000000	315600000	11100000000	5882000000	5214000000	中广核技	1998-09-02	辽宁省	大连市	西岗区	2	2	C26	化学原料及化学制品制造业	0.0284433	0.53008	23.1298	18	1.25954	0.439343	56600000	0.0187249	1	1	-3.85412	326	中广核技	60.1	B	14.24	10	15	17	3.86	1		master only (1)
881	2017	151000000	6369000000	5183000000	425200000	11550000000	5972000000	5575000000	中广核技	1998-09-02	辽宁省	大连市	西岗区	2	2	C26	化学原料及化学制品制造业	0.0368176	0.517185	23.1698	19	1.2289	1.10715	130000000	0.020458	1	1	-3.8915	2416	中广核技	18.96	D	13.09	3.71	0	0	2.16	1		master only (1)
883	2010	6911701	11330000000	8964000000	994700000	28380000000	19090000000	9294000000	湖北能源	1998-05-19	湖北省	武汉市	武昌区			D44	电力、热力生产和供应业	0.0350491	0.672521	24.0689	12	1.26352		22600000	0.0019987	2	0	-3.51607	1851	湖北能源	17.15	D	5.51	3	0	0	8.64	1		master only (1)
883	2011	51600000	9608000000	7987000000	568700000	31320000000	21500000000	9814000000	湖北能源	1998-05-19	湖北省	武汉市	武昌区			D44	电力、热力生产和供应业	0.0181597	0.686594	24.1674	13	1.20296	-0.151771	10700000	0.0011186	2	0	-3.5414	1044	湖北能源	24.87	D	14.05	3	0	0	7.82	1		master only (1)
883	2012	58200000	10300000000	8249000000	709200000	32100000000	18510000000	13600000000	湖北能源	1998-05-19	湖北省	武汉市	武昌区			D44	电力、热力生产和供应业	0.0220922	0.576424	24.1923	14	1.24814	0.0716959	22100000	0.0021458	2	0	-3.57756	1597	湖北能源	21.57	D	12.97	3	0	0	5.6	1		master only (1)
883	2013	60600000	11090000000	9233000000	1122000000	31690000000	17190000000	14500000000	湖北能源	1998-05-19	湖北省	武汉市	武昌区			D44	电力、热力生产和供应业	0.0354042	0.54236	24.1792	15	1.20109	0.0770497	11000000	0.0009878	2	0	-3.61958	1074	湖北能源	25.36	D	19.48	3	0	0	2.88	1		master only (1)
883	2014	63700000	7270000000	4978000000	1291000000	33670000000	18000000000	15680000000	湖北能源	1998-05-19	湖北省	武汉市	武昌区			D44	电力、热力生产和供应业	0.0383397	0.534478	24.24	16	1.46039	-0.344423	255000000	0.0350787	2	0	-3.65004	411	湖北能源	29.17	D	17.5	3	0	0	8.67	1		master only (1)
883	2015	68100000	7085000000	4410000000	1618000000	42990000000	18540000000	24440000000	湖北能源	1998-05-19	湖北省	武汉市	武昌区			D44	电力、热力生产和供应业	0.0376394	0.431381	24.4842	17	1.60654	-0.0254503	204000000	0.0287507	2	0	-3.64853	570	湖北能源	28.96	D	19.07	2.46	0	0	7.43	1		master only (1)
883	2016	70000000	9370000000	6061000000	1960000000	41760000000	15310000000	26450000000	湖北能源	1998-05-19	湖北省	武汉市	武昌区			D44	电力、热力生产和供应业	0.046925	0.366563	24.4552	18	1.54608	0.322541	155000000	0.0165029	2	0	-3.69371	1039	湖北能源	26.98	D	18.12	2.42	0	0	6.44	1		master only (1)
883	2017	72900000	11570000000	8366000000	2076000000	46360000000	18160000000	28190000000	湖北能源	1998-05-19	湖北省	武汉市	武昌区			D44	电力、热力生产和供应业	0.0447814	0.391796	24.5596	19	1.38277	0.234526	124000000	0.0107465	2	0	-3.71466	767	湖北能源	27.12	D	18.23	2.18	0	0	6.71	1		master only (1)
887	2010	6446870	2522000000	1733000000	341000000	2353000000	1202000000	1151000000	中鼎股份	1998-12-03	安徽省	宣城市	宣城市	2	2	C29	橡胶和塑料制品业	0.144912	0.511038	21.5789	12	1.45529		6801766	0.0026965	2	0	-3.61	872	中鼎股份	23.81	D	17.17	4	0	0	2.64	0		master only (1)
887	2011	9294409	3053000000	2199000000	333500000	3045000000	1520000000	1526000000	中鼎股份	1998-12-03	安徽省	宣城市	宣城市	2	2	C29	橡胶和塑料制品业	0.109515	0.49899	21.8369	13	1.38811	0.210388	40600000	0.0132961	2	0	-3.66503	1520	中鼎股份	20.96	D	14.12	4	0	0	2.84	0		master only (1)
887	2012	9550946	3369000000	2384000000	548700000	3907000000	1936000000	1971000000	中鼎股份	1998-12-03	安徽省	宣城市	宣城市	2	2	C29	橡胶和塑料制品业	0.140442	0.495446	22.086	14	1.41293	0.103469	16700000	0.0049649	2	0	-3.71411	915	中鼎股份	27.58	D	20.92	4	0	0	2.66	0		master only (1)
887	2013	10900000	4162000000	2990000000	403700000	4142000000	1853000000	2289000000	中鼎股份	1998-12-03	安徽省	宣城市	宣城市	2	2	C29	橡胶和塑料制品业	0.0974649	0.447296	22.1444	15	1.39193	0.235283	20000000	0.004807	2	0	-3.75546	1037	中鼎股份	25.76	D	18.09	4	0	0	3.67	0		master only (1)
887	2014	63500000	5040000000	3545000000	587700000	5426000000	2352000000	3074000000	中鼎股份	1998-12-03	安徽省	宣城市	宣城市	2	2	C29	橡胶和塑料制品业	0.1083	0.433492	22.4145	16	1.42187	0.211091	16800000	0.0033281	2	0	-3.79792	1269	中鼎股份	22.67	D	17.09	2.74	0	0	2.84	0		master only (1)
887	2015	177000000	6543000000	4531000000	749900000	7471000000	3670000000	3801000000	中鼎股份	1998-12-03	安徽省	宣城市	宣城市	2	2	C29	橡胶和塑料制品业	0.100377	0.491278	22.7343	17	1.44416	0.298181	26600000	0.0040599	2	0	-3.83272	1117	中鼎股份	24.35	D	18.59	2.5	0	0	3.26	0		master only (1)
887	2016	256000000	8384000000	5899000000	928800000	11870000000	5240000000	6625000000	中鼎股份	1998-12-03	安徽省	宣城市	宣城市	2	2	C29	橡胶和塑料制品业	0.0782783	0.441631	23.1969	18	1.42144	0.28141	28300000	0.0033709	2	0	-3.84964	1523	中鼎股份	23.64	D	18.58	2.29	0	0	2.77	0		master only (1)
887	2017	407000000	11770000000	8428000000	1154000000	15350000000	7583000000	7766000000	中鼎股份	1998-12-03	安徽省	宣城市	宣城市	2	2	C29	橡胶和塑料制品业	0.0751583	0.494019	23.4543	19	1.39665	0.40386	76100000	0.0064636	2	0	-3.86882	727	中鼎股份	27.37	D	21.8	2.24	0	0	3.33	0		master only (1)
898	2010	60000000	92430000000	82690000000	1950000000	105100000000	49770000000	55350000000	鞍钢股份	1997-12-25	辽宁省	鞍山市	铁西区			C31	黑色金属冶炼及压延加工业	0.0185513	0.473476	25.3783	13	1.11775		117000000	0.0012658	1	1	-3.29276	332	鞍钢股份	53.25	C	11.97	13.1	11	14	3.18	1		master only (1)
898	2011	64000000	90420000000	86410000000	-2332000000	103000000000	50680000000	52310000000	鞍钢股份	1997-12-25	辽宁省	鞍山市	铁西区			C31	黑色金属冶炼及压延加工业	-0.0226434	0.492125	25.3579	14	1.04649	-0.0217243	190000000	0.0021012	1	1	-3.338	545	鞍钢股份	44.07	C	7.6	12.97	11	6	6.5	1	132000000	matched (3)
898	2012	79000000	77750000000	75630000000	-4380000000	101200000000	53010000000	48230000000	鞍钢股份	1997-12-25	辽宁省	鞍山市	铁西区			C31	黑色金属冶炼及压延加工业	-0.0432648	0.523603	25.3407	15	1.02801	-0.140175	60000000	0.0007717	1	1	-3.38237	559	鞍钢股份	53.38	C	4.14	10.64	12	23	3.6	1	13000000	matched (3)
898	2013	79000000	75330000000	66930000000	755000000	92870000000	45780000000	47090000000	鞍钢股份	1997-12-25	辽宁省	鞍山市	铁西区			C31	黑色金属冶炼及压延加工业	0.0081301	0.49292	25.2544	16	1.12551	-0.0311133	113000000	0.0015001	1	1	-3.44399	492	鞍钢股份	59.5	C	13.71	11.45	12	23	-0.66	1	34000000	matched (3)
898	2014	80000000	74050000000	65490000000	924000000	91290000000	43100000000	48200000000	鞍钢股份	1997-12-25	辽宁省	鞍山市	铁西区			C31	黑色金属冶炼及压延加工业	0.0101215	0.472062	25.2373	17	1.13065	-0.017032	101000000	0.001364	1	1	-3.48819	38	鞍钢股份	68.22	B	15.26	11.96	12	24	5	1	19000000	matched (3)
898	2015	98000000	52760000000	49470000000	-4600000000	88600000000	44920000000	43680000000	鞍钢股份	1997-12-25	辽宁省	鞍山市	铁西区			C31	黑色金属冶炼及压延加工业	-0.0519211	0.506964	25.2074	18	1.06651	-0.287484	128000000	0.0024261	1	1	-3.5355	236	鞍钢股份	53.94	C	1.38	11.66	15	30	-4.1	1	51000000	matched (3)
898	2016	100000000	57880000000	50190000000	1615000000	88070000000	42780000000	45290000000	鞍钢股份	1997-12-25	辽宁省	鞍山市	铁西区			C31	黑色金属冶炼及压延加工业	0.0183379	0.485767	25.2014	19	1.15335	0.0971019	40000000	0.0006911	1	1	-3.57695	376	鞍钢股份	57.84	C	8.36	11.43	15	23	0.05	1		master only (1)
898	2017	106000000	84310000000	72740000000	5612000000	89200000000	38820000000	50390000000	鞍钢股份	1997-12-25	辽宁省	鞍山市	铁西区			C31	黑色金属冶炼及压延加工业	0.062912	0.43516	25.2142	20	1.15901	0.456584	72000000	0.000854	1	1	-3.61384	2055	鞍钢股份	20.68	D	20.01	1.12	0	0	-0.45	1	39000000	matched (3)
899	2010	2288557	2057000000	1861000000	-39561087	6460000000	5009000000	1451000000	赣能股份	1997-11-26	江西省	南昌市	青山湖区	1	1	D44	电力、热力生产和供应业	-0.0061239	0.775316	22.5889	13	1.1055		41300	2.01e-05	2	0	-3.67618	2275	赣能股份	7.28	D	7.59	1.13	0	0	-1.44	1		master only (1)
899	2011	2359093	2590000000	2567000000	-271500000	6684000000	5504000000	1180000000	赣能股份	1997-11-26	江西省	南昌市	青山湖区	1	1	D44	电力、热力生产和供应业	-0.0406241	0.823472	22.623	14	1.00898	0.258976	0	0	2	0	-3.71553	2568	赣能股份	2.04	D	0.82	1.22	0	0	0	1		master only (1)
899	2012	2498360	2570000000	2132000000	164900000	6182000000	4857000000	1325000000	赣能股份	1997-11-26	江西省	南昌市	青山湖区	1	1	D44	电力、热力生产和供应业	0.0266761	0.785661	22.5449	15	1.20562	-0.0075482	353800	0.0001377	2	0	-3.75686	2542	赣能股份	11.82	D	10.11	1.71	0	0	0	1		master only (1)
899	2013	2512160	2649000000	1917000000	440800000	6137000000	4364000000	1773000000	赣能股份	1997-11-26	江西省	南昌市	青山湖区	1	1	D44	电力、热力生产和供应业	0.0718267	0.711102	22.5377	16	1.38183	0.0307509	312000	0.0001178	2	0	-3.79696	1668	赣能股份	21.19	D	19.97	1.28	0	0	-0.06	1		master only (1)
899	2014	2582724	2669000000	1904000000	387800000	5951000000	3837000000	2114000000	赣能股份	1997-11-26	江西省	南昌市	青山湖区	1	1	D44	电力、热力生产和供应业	0.0651696	0.644837	22.5068	17	1.40202	0.0075316	626278	0.0002346	2	0	-3.83732	387	赣能股份	29.74	D	20.08	1.43	0	0	8.23	1		master only (1)
899	2015	2582724	2553000000	1613000000	574600000	5974000000	3350000000	2624000000	赣能股份	1997-11-26	江西省	南昌市	青山湖区	1	1	D44	电力、热力生产和供应业	0.0961753	0.560831	22.5107	18	1.58209	-0.0436145	346256	0.0001356	2	0	-3.87728	362	赣能股份	33.5	D	22.94	1.92	0	0	8.64	1		master only (1)
899	2016	3671096	2177000000	1576000000	378200000	7568000000	2799000000	4769000000	赣能股份	1997-11-26	江西省	南昌市	青山湖区	1	1	D44	电力、热力生产和供应业	0.0499804	0.369861	22.7472	19	1.38149	-0.147327	553995	0.0002545	2	0	-3.91233	761	赣能股份	30.03	D	20.32	1.92	0	0	7.79	1		master only (1)
899	2017	3961930	2126000000	1864000000	16450075	7319000000	2851000000	4469000000	赣能股份	1997-11-26	江西省	南昌市	青山湖区	1	1	D44	电力、热力生产和供应业	0.0022474	0.389494	22.7138	20	1.14078	-0.0231069	650929	0.0003061	2	0	-3.95332	3263	赣能股份	9.4	D	7.54	0.95	0	0	0.91	1		master only (1)
902	2010	495784	2039000000	1919000000	23596727	1297000000	881700000	415600000	新洋丰	1999-04-08	湖北省	荆门市	荆门市			C26	化学原料及化学制品制造业	0.0181886	0.679631	20.9836	11	1.0627		1302322	0.0006386	2	0	-3.51348	1502	新洋丰	19.68	D	9.36	0.32	0	0	10	1	500000	matched (3)
902	2011	495784	1775000000	1671000000	4.01719e+06	1214000000	805200000	409300000	新洋丰	1999-04-08	湖北省	荆门市	荆门市			C26	化学原料及化学制品制造业	0.0033078	0.662978	20.9176	12	1.06248	-0.129495	2314102	0.0013036	2	0	-3.54533	2099	新洋丰	16.62	D	6.42	0.2	0	0	10	1	1849502	matched (3)
902	2012	495784	1565000000	1488000000	-46962323	1148000000	785500000	362300000	新洋丰	1999-04-08	湖北省	荆门市	荆门市			C26	化学原料及化学制品制造业	-0.0409162	0.684333	20.8611	13	1.052	-0.118225	1003362	0.000641	2	0	-3.57806	2749	新洋丰	1.75	D	1.94	0.39	0	0	-0.58	1	38561.7	matched (3)
902	2013	548366	1768000000	1667000000	-46708243	1336000000	1038000000	297400000	新洋丰	1999-04-08	湖北省	荆门市	荆门市			C26	化学原料及化学制品制造业	-0.0349704	0.777347	21.0127	14	1.06041	0.129435	1286547	0.0007277	2	0	-3.63695	3048	新洋丰	1	D	2.33	0.28	0	0	-1.61	1	55061.7	matched (3)
902	2014	52100000	8352000000	6801000000	588600000	5186000000	2267000000	2919000000	新洋丰	1999-04-08	湖北省	荆门市	荆门市			C26	化学原料及化学制品制造业	0.113489	0.43712	22.3693	15	1.22809	3.72441	7144411	0.0008554	2	0	-3.75795	1490	新洋丰	21.57	D	14.65	0.85	0	0	6.07	0	912676	matched (3)
902	2015	53700000	9619000000	7813000000	777900000	6970000000	1969000000	5002000000	新洋丰	1999-04-08	湖北省	荆门市	荆门市			C26	化学原料及化学制品制造业	0.111593	0.282466	22.665	16	1.23112	0.151679	11400000	0.00118	2	0	-3.7946	627	新洋丰	28.22	D	20.15	0.85	0	0	7.22	0	1412676	matched (3)
902	2016	71500000	8276000000	6941000000	579400000	7889000000	2550000000	5339000000	新洋丰	1999-04-08	湖北省	荆门市	荆门市			C26	化学原料及化学制品制造业	0.073448	0.323197	22.7887	17	1.19238	-0.139592	10700000	0.0012901	2	0	-3.83096	1052	新洋丰	26.82	D	18.75	0.69	0	0	7.38	0	1857121	matched (3)
902	2017	87900000	9032000000	7336000000	691800000	8745000000	2909000000	5837000000	新洋丰	1999-04-08	湖北省	荆门市	荆门市			C26	化学原料及化学制品制造业	0.0791006	0.332607	22.8918	18	1.2312	0.0913522	13600000	0.0015043	2	0	-3.86693	623	新洋丰	28	D	19.96	0.8	0	0	7.24	0	1308333	matched (3)
912	2010	142000000	3505000000	3108000000	-239800000	7279000000	4075000000	3204000000	泸天化	1999-06-03	四川省	泸州市	纳溪区			C26	化学原料及化学制品制造业	-0.0329453	0.559836	22.7082	11	1.12786		49400000	0.0141061	3	0	-3.59348	2259	*ST天化	8.28	D	5.96	3.63	0	0	-1.31	1		master only (1)
912	2011	143000000	3860000000	3161000000	28187712	9194000000	5884000000	3310000000	泸天化	1999-06-03	四川省	泸州市	纳溪区			C26	化学原料及化学制品制造业	0.003066	0.639951	22.9418	12	1.22086	0.101217	2167139	0.0005615	3	0	-3.62464	2224	*ST天化	15.04	D	7.36	2.68	0	0	5	1		master only (1)
912	2012	144000000	4168000000	3432000000	79476281	12750000000	9692000000	3058000000	泸天化	1999-06-03	四川省	泸州市	纳溪区			C26	化学原料及化学制品制造业	0.0062335	0.760189	23.2688	13	1.21438	0.0798695	2991182	0.0007177	3	0	-3.64439	2419	*ST天化	14.46	D	7.82	2.91	0	0	3.73	1		master only (1)
912	2013	144000000	4071000000	3555000000	-406100000	13810000000	11080000000	2731000000	泸天化	1999-06-03	四川省	泸州市	纳溪区			C26	化学原料及化学制品制造业	-0.0294093	0.802218	23.3485	14	1.14531	-0.0231804	4569923	0.0011225	3	0	-3.67806	2973	*ST天化	5.4	D	1	2.94	0	0	1.46	1		master only (1)
912	2014	153000000	4004000000	3908000000	-1349000000	12640000000	11480000000	1165000000	泸天化	1999-06-03	四川省	泸州市	纳溪区			C26	化学原料及化学制品制造业	-0.106661	0.907888	23.2604	15	1.02434	-0.0166464	11300000	0.0028229	3	0	-3.72503	3398	*ST天化	0.85	D	-3.8	4	0	0	0.65	1		master only (1)
912	2015	51700000	3028000000	2743000000	-29616372	8286000000	7541000000	745200000	泸天化	1999-06-03	四川省	泸州市	纳溪区			C26	化学原料及化学制品制造业	-0.0035741	0.910071	22.8379	16	1.10397	-0.243719	54100000	0.0178536	3	0	-3.78915	3301	*ST天化	4.4	D	5.4	4	0	0	-5	1		master only (1)
912	2016	52000000	3059000000	2996000000	-638000000	7665000000	7549000000	115400000	泸天化	1999-06-03	四川省	泸州市	纳溪区			C26	化学原料及化学制品制造业	-0.0832335	0.984946	22.7599	17	1.02103	0.0103605	19800000	0.0064718	3	0	-3.83193	3486	*ST天化	0.51	D	-3.6	4	0	0	0.11	1		master only (1)
912	2017	52200000	3735000000	3304000000	-1489000000	5956000000	7322000000	-1366000000	泸天化	1999-06-03	四川省	泸州市	纳溪区			C26	化学原料及化学制品制造业	-0.249944	1.22941	22.5077	18	1.13051	0.220843	55500000	0.0148639	3	0	-3.87731	3453	*ST天化	0.41	D	-2.05	4	0	0	-1.54	1		master only (1)
920	2010	8081617	1446000000	1166000000	83270063	1458000000	489900000	967700000	南方汇通	1999-06-16	贵州省	贵阳市	白云区	1	1	C26	化学原料及化学制品制造业	0.0571281	0.336133	21.1001	11	1.24065		59200000	0.0409578	3	0	-3.52693	2119	南方汇通	13.76	D	10.41	1.22	0	0	2.13	1	2446000	matched (3)
920	2011	8826736	1768000000	1395000000	96875938	1869000000	842700000	1026000000	南方汇通	1999-06-16	贵州省	贵阳市	白云区	1	1	C26	化学原料及化学制品制造业	0.051845	0.450982	21.3484	12	1.2678	0.222583	18200000	0.0102981	3	0	-3.59173	2317	南方汇通	13.42	D	8.8	1.63	0	0	2.99	1	354000	matched (3)
920	2012	9534324	2211000000	1769000000	112600000	1995000000	802700000	1192000000	南方汇通	1999-06-16	贵州省	贵阳市	白云区	1	1	C26	化学原料及化学制品制造业	0.0564583	0.402343	21.4139	13	1.24965	0.250203	17000000	0.0076953	3	0	-3.63739	2444	南方汇通	14.12	D	9.3	2.28	0	0	2.54	1	0	matched (3)
920	2013	10900000	2285000000	1852000000	122100000	2471000000	1129000000	1342000000	南方汇通	1999-06-16	贵州省	贵阳市	白云区	1	1	C26	化学原料及化学制品制造业	0.0494119	0.456938	21.628	14	1.23333	0.0334189	35100000	0.0153573	3	0	-3.6933	2687	南方汇通	14.04	D	9.19	2.16	0	0	2.69	1	210000	matched (3)
920	2014	1741225	2062000000	1600000000	241500000	1572000000	480700000	1091000000	南方汇通	1999-06-16	贵州省	贵阳市	白云区	1	1	C26	化学原料及化学制品制造业	0.153596	0.30574	21.1757	15	1.2886	-0.0973618	79700000	0.0386415	3	0	-3.69504	2727	南方汇通	15.61	D	13.29	0.54	0	0	1.78	1	0	matched (3)
920	2015	2743396	904600000	506100000	121200000	1673000000	596900000	1076000000	南方汇通	1999-06-16	贵州省	贵阳市	白云区	1	1	C26	化学原料及化学制品制造业	0.0724597	0.356741	21.238	16	1.78722	-0.561328	26900000	0.029685	3	0	-3.74136	2559	南方汇通	17.27	D	14.26	0.31	0	0	2.7	1	8450000	matched (3)
920	2016	7744235	1009000000	565900000	134800000	1787000000	885200000	902000000	南方汇通	1999-06-16	贵州省	贵阳市	白云区	1	1	C26	化学原料及化学制品制造业	0.0754445	0.4953	21.304	17	1.78378	0.115838	32000000	0.0317131	3	0	-3.78768	2723	南方汇通	17.32	D	14.19	0.29	0	0	2.84	1	0	matched (3)
920	2017	8460214	1083000000	633700000	127000000	1819000000	849300000	969400000	南方汇通	1999-06-16	贵州省	贵阳市	白云区	1	1	C26	化学原料及化学制品制造业	0.0698448	0.46697	21.3214	18	1.70867	0.0727781	23600000	0.0217811	3	0	-3.82929	2297	南方汇通	19.53	D	15.91	0.28	0	0	3.34	1		master only (1)
923	2010	5891751	716300000	622600000	19837257	1121000000	500100000	620500000	河北宣工	1999-07-14	河北省	张家口市	宣化区	1	2	B08	黑色金属矿采选业	0.0177023	0.446237	20.8371	11	1.15057		987000	0.0013778	1	1	-3.4949	2042	河北宣工	14.81	D	9.94	0.46	0	0	4.41	1		master only (1)
923	2011	5891751	574000000	511300000	10310945	1281000000	700300000	580800000	河北宣工	1999-07-14	河北省	张家口市	宣化区	1	2	B08	黑色金属矿采选业	0.0080486	0.546657	20.971	12	1.12247	-0.198751	410100	0.0007145	1	1	-3.55195	2337	河北宣工	12.96	D	7.39	1.13	0	0	4.44	1		master only (1)
923	2012	7132670	426000000	372800000	5.39882e+06	1445000000	847800000	597100000	河北宣工	1999-07-14	河北省	张家口市	宣化区	1	2	B08	黑色金属矿采选业	0.0037363	0.586741	21.0913	13	1.14262	-0.257811	432300	0.0010148	1	1	-3.60597	2486	河北宣工	13.41	D	7.39	1.02	0	0	5	1		master only (1)
923	2013	7883106	372700000	337400000	4.10071e+06	1527000000	1005000000	522500000	河北宣工	1999-07-14	河北省	张家口市	宣化区	1	2	B08	黑色金属矿采选业	0.0026849	0.657875	21.1468	14	1.10449	-0.125179	583300	0.0015652	1	1	-3.652	2736	河北宣工	13.53	D	8.05	1.32	0	0	4.16	1		master only (1)
923	2014	7930862	243600000	243100000	-72063909	1465000000	1016000000	449400000	河北宣工	1999-07-14	河北省	张家口市	宣化区	1	2	B08	黑色金属矿采选业	-0.0491838	0.693266	21.1053	15	1.00222	-0.346326	537500	0.0022065	1	1	-3.6875	3286	河北宣工	4.94	D	-0.63	1.06	0	0	4.51	1		master only (1)
923	2015	7930862	254900000	199300000	697628	1461000000	1040000000	421200000	河北宣工	1999-07-14	河北省	张家口市	宣化区	1	2	B08	黑色金属矿采选业	0.0004776	0.711657	21.1023	16	1.27859	0.0461815	423100	0.0016602	1	1	-3.72717	3242	河北宣工	7.15	D	6.43	1.17	0	0	-0.45	1		master only (1)
923	2016	7930862	260900000	233400000	2.09163e+06	1409000000	1001000000	407900000	河北宣工	1999-07-14	河北省	张家口市	宣化区	1	2	B08	黑色金属矿采选业	0.0014843	0.710503	21.0663	17	1.11803	0.0237499	2414300	0.0092536	1	1	-3.76315	3154	河北宣工	13.11	D	6.59	1.52	0	0	5	1		master only (1)
923	2017	1220000000	5401000000	2080000000	448300000	13580000000	4715000000	8863000000	河北宣工	1999-07-14	河北省	张家口市	宣化区	1	2	B08	黑色金属矿采选业	0.0330163	0.347239	23.3317	18	2.59631	19.7018	1230000	0.0002277	1	1	-3.83944	2408	河北宣工	19	D	11.83	2.17	0	0	5	1		master only (1)
930	2010	27200000	5967000000	5759000000	271400000	6923000000	4321000000	2602000000	中粮生化	1999-07-12	安徽省	蚌埠市	禹会区	2	2	C26	化学原料及化学制品制造业	0.0392029	0.624186	22.6581	11	1.03624		929000000	0.155749	2	0	-3.59476	442	中粮生化	48.36	C	11.09	7.72	12	11	6.55	1	500000	matched (3)
930	2011	28500000	7401000000	6695000000	361300000	6477000000	3539000000	2939000000	中粮生化	1999-07-12	安徽省	蚌埠市	禹会区	2	2	C26	化学原料及化学制品制造业	0.0557856	0.546311	22.5916	12	1.10548	0.240331	663000000	0.0895761	2	0	-3.63613	62	中粮生化	72.9	B	14.14	7.79	20	15	15.97	1		master only (1)
930	2012	28600000	7730000000	6956000000	201500000	6859000000	3790000000	3069000000	中粮生化	1999-07-12	安徽省	蚌埠市	禹会区	2	2	C26	化学原料及化学制品制造业	0.0293715	0.552548	22.6488	13	1.1114	0.0444624	365000000	0.0472765	2	0	-3.67497	358	中粮生化	61.72	B	13.71	6.5	20	13	8.51	1		master only (1)
930	2013	29600000	7340000000	6653000000	50473333	6551000000	3458000000	3093000000	中粮生化	1999-07-12	安徽省	蚌埠市	禹会区	2	2	C26	化学原料及化学制品制造业	0.0077042	0.52781	22.6029	14	1.1033	-0.0505161	198000000	0.026999	2	0	-3.71592	562	中粮生化	54.39	C	11.68	6.8	18	15.5	2.41	1	8500000	matched (3)
930	2014	31600000	7153000000	6463000000	31590997	6864000000	3760000000	3104000000	中粮生化	1999-07-12	安徽省	蚌埠市	禹会区	2	2	C26	化学原料及化学制品制造业	0.0046023	0.547832	22.6496	15	1.10678	-0.025432	111000000	0.0155605	2	0	-3.75495	120	中粮生化	53.67	C	11.51	6.16	17	9	10	1	8770000	matched (3)
930	2015	43700000	6457000000	6482000000	-1495000000	5648000000	4074000000	1574000000	中粮生化	1999-07-12	安徽省	蚌埠市	禹会区	2	2	C26	化学原料及化学制品制造业	-0.264677	0.721373	22.4546	16	0.996149	-0.097287	78800000	0.0122035	2	0	-3.79775	288	中粮生化	37.71	D	0.18	7.05	20	11	-0.52	1	0	matched (3)
930	2016	43800000	5603000000	4831000000	133200000	5435000000	3729000000	1706000000	中粮生化	1999-07-12	安徽省	蚌埠市	禹会区	2	2	C26	化学原料及化学制品制造业	0.0245154	0.686142	22.4161	17	1.15992	-0.13224	216000000	0.0385649	2	0	-3.83792	3288	中粮生化	10.01	D	8.21	1.11	0	0	0.69	1		master only (1)
930	2017	44600000	6276000000	5597000000	249700000	5956000000	3995000000	1961000000	中粮生化	1999-07-12	安徽省	蚌埠市	禹会区	2	2	C26	化学原料及化学制品制造业	0.0419188	0.670688	22.5077	18	1.1214	0.120024	346000000	0.0550994	2	0	-3.87732	3121	中粮生化	12.95	D	10.36	1.25	0	0	1.34	1		master only (1)
932	2010	1671355	60560000000	59680000000	-2740000000	74720000000	60230000000	14490000000	华菱钢铁	1999-08-03	湖南省	长沙市	天心区			C31	黑色金属冶炼及压延加工业	-0.0366775	0.806066	25.037	11	1.01486		0	0	2	0	-3.29561	514	*ST华菱	38.28	D	4.56	9.2	11	15	-1.48	1		master only (1)
932	2011	6431265	73790000000	71250000000	73128415	85970000000	70780000000	15180000000	华菱钢铁	1999-08-03	湖南省	长沙市	天心区			C31	黑色金属冶炼及压延加工业	0.0008506	0.823368	25.1773	12	1.03564	0.21837	1170000000	0.0157948	2	0	-3.30277	369	*ST华菱	56.34	C	7.27	12.81	10	20	6.26	1	860000000	matched (3)
932	2012	15800000	59260000000	58290000000	-3463000000	65640000000	53950000000	11690000000	华菱钢铁	1999-08-03	湖南省	长沙市	天心区			C31	黑色金属冶炼及压延加工业	-0.0527624	0.821957	24.9074	13	1.01656	-0.196948	10300000	0.0001731	2	0	-3.40443	2757	*ST华菱	1.19	D	-0.22	1.97	0	0	-0.56	1		master only (1)
932	2013	18600000	59650000000	56500000000	147500000	70790000000	57860000000	12930000000	华菱钢铁	1999-08-03	湖南省	长沙市	天心区			C31	黑色金属冶炼及压延加工业	0.0020831	0.817282	24.983	14	1.05587	0.0066817	263000000	0.004408	2	0	-3.42779	2892	*ST华菱	9.79	D	6.32	1.52	0	0	1.95	1	7212969	matched (3)
932	2014	18900000	55600000000	51250000000	146600000	73090000000	58390000000	14700000000	华菱钢铁	1999-08-03	湖南省	长沙市	天心区			C31	黑色金属冶炼及压延加工业	0.0020051	0.79889	25.015	15	1.08488	-0.0679328	175000000	0.0031519	2	0	-3.4606	3135	*ST华菱	10.95	D	6.36	1.75	0	0	2.84	1	8476876	matched (3)
932	2015	87800000	41410000000	40240000000	-4019000000	76500000000	65830000000	10670000000	华菱钢铁	1999-08-03	湖南省	长沙市	天心区			C31	黑色金属冶炼及压延加工业	-0.0525382	0.860471	25.0605	16	1.02894	-0.255293	157000000	0.0037843	2	0	-3.49021	3394	*ST华菱	1.78	D	-0.93	2.01	0	0	0.7	1	13700000	matched (3)
932	2016	97800000	49810000000	46470000000	-1553000000	70950000000	61650000000	9297000000	华菱钢铁	1999-08-03	湖南省	长沙市	天心区			C31	黑色金属冶炼及压延加工业	-0.0218889	0.86896	24.9852	17	1.07196	0.203015	140000000	0.0028046	2	0	-3.5473	3386	*ST华菱	5.26	D	1.61	2.43	0	0	1.22	1	11900000	matched (3)
932	2017	207000000	76510000000	65940000000	5296000000	74930000000	60350000000	14580000000	华菱钢铁	1999-08-03	湖南省	长沙市	天心区			C31	黑色金属冶炼及压延加工业	0.0706829	0.805407	25.0398	18	1.1603	0.53602	152000000	0.0019916	2	0	-3.57496	2866	*ST华菱	15.63	D	12.75	2.77	0	0	0.11	1		master only (1)
933	2010	1440000000	16900000000	13950000000	1031000000	24670000000	18710000000	5962000000	神火股份	1999-08-31	河南省	商丘市	永城市			C32	有色金属冶炼和压延加工业	0.0417992	0.75829	23.9288	11	1.21178		104000000	0.0061636	2	0	-3.49552	135	神火股份	60.9	B	16.05	9.35	14	15	6.5	1	1400000	matched (3)
933	2011	1690000000	30700000000	27350000000	1111000000	30080000000	23150000000	6928000000	神火股份	1999-08-31	河南省	商丘市	永城市			C32	有色金属冶炼和压延加工业	0.0369387	0.769648	24.127	12	1.12262	0.816231	30400000	0.0009907	2	0	-3.50751	138	神火股份	68.12	B	16.63	11.56	14	20	5.93	1	521900	matched (3)
933	2012	5040000000	27980000000	25720000000	119300000	39710000000	29550000000	10160000000	神火股份	1999-08-31	河南省	商丘市	永城市			C32	有色金属冶炼和压延加工业	0.0030058	0.744141	24.4048	13	1.08816	-0.088409	50000000	0.001785	2	0	-3.50259	232	神火股份	66.36	B	12.99	12.87	14	20	6.5	1	320000	matched (3)
933	2013	5080000000	25690000000	23670000000	18483916	43410000000	32220000000	11190000000	神火股份	1999-08-31	河南省	商丘市	永城市			C32	有色金属冶炼和压延加工业	0.0004258	0.742234	24.494	14	1.08522	-0.0821081	143000000	0.0055611	2	0	-3.52674	444	神火股份	61.25	B	11.56	13.69	14	17	5	1	3000000	matched (3)
933	2014	5080000000	23970000000	21140000000	-412400000	51140000000	40720000000	10420000000	神火股份	1999-08-31	河南省	商丘市	永城市			C32	有色金属冶炼和压延加工业	-0.0080655	0.796247	24.6578	15	1.13381	-0.0669628	50700000	0.0021159	2	0	-3.5359	146	神火股份	42.96	C	8.31	13.65	12	14	-5	1	300000	matched (3)
933	2015	5080000000	17560000000	16330000000	-1840000000	50440000000	41830000000	8608000000	神火股份	1999-08-31	河南省	商丘市	永城市			C32	有色金属冶炼和压延加工业	-0.0364713	0.829324	24.644	16	1.07492	-0.267404	119000000	0.0067754	2	0	-3.57858	3370	神火股份	2.17	D	-0.12	3.14	0	0	-0.85	1	1743356	matched (3)
933	2016	5080000000	16900000000	13110000000	-1025000000	51760000000	44110000000	7653000000	神火股份	1999-08-31	河南省	商丘市	永城市			C32	有色金属冶炼和压延加工业	-0.0197962	0.852143	24.6699	17	1.28961	-0.0373561	71100000	0.0042062	2	0	-3.61352	474	神火股份	51.86	C	11.98	12.88	15	17	-5	1	2620000	matched (3)
933	2017	5380000000	18900000000	14360000000	306500000	53930000000	46100000000	7835000000	神火股份	1999-08-31	河南省	商丘市	永城市			C32	有色金属冶炼和压延加工业	0.005683	0.854719	24.711	18	1.31601	0.11814	190000000	0.0100299	2	0	-3.64537	2399	神火股份	19.04	D	11.43	2.61	0	0	5	1	60000	matched (3)
935	2010	20100000	636100000	499100000	46755434	1321000000	797700000	523000000	四川双马	1999-08-24	四川省	绵阳市	江油市			C30	非金属矿物制品业	0.0354002	0.604	21.0015	11	1.27439		18400000	0.0289388	3	0	-3.51562	1937	四川双马	16.26	D	10.53	2.54	0	0	3.19	0		master only (1)
935	2011	196000000	2034000000	1605000000	330800000	4943000000	1597000000	3346000000	四川双马	1999-08-24	四川省	绵阳市	江油市			C30	非金属矿物制品业	0.066917	0.323103	22.3212	12	1.26722	2.19743	26800000	0.0131731	3	0	-3.63778	1838	四川双马	18.78	D	11.8	2.19	0	0	4.79	0		master only (1)
935	2012	196000000	1865000000	1697000000	72238392	4895000000	1554000000	3341000000	四川双马	1999-08-24	四川省	绵阳市	江油市			C30	非金属矿物制品业	0.0147581	0.317421	22.3114	13	1.09915	-0.0830492	4679619	0.0025093	3	0	-3.67773	2697	四川双马	4.81	D	7.17	2.64	0	0	-5	0		master only (1)
935	2013	197000000	2017000000	1667000000	197300000	4818000000	1382000000	3436000000	四川双马	1999-08-24	四川省	绵阳市	江油市			C30	非金属矿物制品业	0.0409543	0.28676	22.2955	14	1.21023	0.0816411	9527134	0.0047231	3	0	-3.71761	2515	四川双马	16.06	D	10.01	2.92	0	0	3.13	0	5000	matched (3)
935	2014	199000000	1996000000	1597000000	165800000	4707000000	1305000000	3402000000	四川双马	1999-08-24	四川省	绵阳市	江油市			C30	非金属矿物制品业	0.0352277	0.277294	22.2724	15	1.24997	-0.0102652	11400000	0.0056939	3	0	-3.75741	2527	四川双马	16.92	D	10.76	2.72	0	0	3.44	0	165972	matched (3)
935	2015	216000000	1975000000	1766000000	-105700000	5451000000	2185000000	3266000000	四川双马	1999-08-24	四川省	绵阳市	江油市			C30	非金属矿物制品业	-0.0193809	0.400878	22.4191	16	1.11781	-0.0109615	23600000	0.0119559	3	0	-3.79791	3228	四川双马	7.89	D	3.97	3.59	0	0	0.33	0	171667	matched (3)
935	2016	218000000	2238000000	1858000000	108300000	5410000000	2085000000	3324000000	四川双马	1999-08-24	四川省	绵阳市	江油市			C30	非金属矿物制品业	0.020017	0.385493	22.4115	17	1.20448	0.133392	40100000	0.0179134	3	0	-3.83793	2844	四川双马	16.55	D	8.43	3.12	0	0	5	0	207167	matched (3)
935	2017	218000000	2748000000	2152000000	246900000	6106000000	2528000000	3579000000	四川双马	1999-08-24	四川省	绵阳市	江油市			C30	非金属矿物制品业	0.0404395	0.41394	22.5326	18	1.277	0.227889	31900000	0.0115931	3	0	-3.87703	2185	四川双马	20.06	D	15.08	1.97	0	0	3.01	0	0	matched (3)
936	2010	0	3246000000	2875000000	203600000	3540000000	1571000000	1969000000	华西股份	1999-08-10	江苏省	无锡市	江阴市			C28	化学纤维制造业	0.0574997	0.443831	21.9875	11	1.1291		350000	0.0001078	1	1	-3.59115	1856	华西股份	17.12	D	12.51	0.67	0	0	3.94	0		master only (1)
936	2011	0	3516000000	3280000000	173200000	3019000000	1133000000	1885000000	华西股份	1999-08-10	江苏省	无锡市	江阴市			C28	化学纤维制造业	0.0573786	0.375437	21.828	12	1.07187	0.0831722	264600	7.53e-05	1	1	-3.62461	1923	华西股份	18.17	D	14.02	1.45	0	0	2.7	0		master only (1)
936	2012	0	2651000000	2504000000	156500000	2974000000	989100000	1985000000	华西股份	1999-08-10	江苏省	无锡市	江阴市			C28	化学纤维制造业	0.0526096	0.33256	21.8132	13	1.05885	-0.246023	4020000	0.0015165	1	1	-3.66389	1826	华西股份	19.65	D	15.02	1.8	0	0	2.83	0		master only (1)
936	2013	0	2214000000	2119000000	58080838	2855000000	884000000	1971000000	华西股份	1999-08-10	江苏省	无锡市	江阴市			C28	化学纤维制造业	0.0203441	0.309651	21.7723	14	1.04476	-0.164981	886600	0.0004005	1	1	-3.7018	2647	华西股份	14.76	D	12.25	1.44	0	0	1.07	0	16500	matched (3)
936	2014	0	2066000000	1934000000	66516061	3478000000	1115000000	2363000000	华西股份	1999-08-10	江苏省	无锡市	江阴市			C28	化学纤维制造业	0.0191239	0.32066	21.9698	15	1.06819	-0.0665402	294700	0.0001426	1	1	-3.75054	2949	华西股份	13.56	D	10.72	0.93	0	0	1.91	0	5000	matched (3)
936	2015	0	2013000000	1837000000	95318422	3898000000	963700000	2934000000	华西股份	1999-08-10	江苏省	无锡市	江阴市			C28	化学纤维制造业	0.0244522	0.247215	22.0838	16	1.0955	-0.0257808	793900	0.0003944	1	1	-3.79405	2754	华西股份	16.06	D	11.29	1.84	0	0	2.93	0	0	matched (3)
936	2016	225300	2125000000	1857000000	613200000	8759000000	3768000000	4991000000	华西股份	1999-08-10	江苏省	无锡市	江阴市			C28	化学纤维制造业	0.0700126	0.430175	22.8933	17	1.14474	0.055822	4713500	0.0022178	1	1	-3.82686	766	华西股份	29.94	D	21.63	4	0	0	4.31	0		master only (1)
936	2017	1725659	2842000000	2543000000	205500000	11130000000	6438000000	4692000000	华西股份	1999-08-10	江苏省	无锡市	江阴市			C28	化学纤维制造业	0.0184667	0.578474	23.1329	18	1.11787	0.337392	18300000	0.0064436	1	1	-3.85392	2177	华西股份	20.1	D	13.16	3.66	0	0	3.28	0		master only (1)
937	2010	2340000000	30290000000	22530000000	2487000000	25230000000	12760000000	12470000000	冀中能源	1999-09-09	河北省	邢台市	桥西区			B06	煤炭开采和洗选业	0.0985837	0.505701	23.9512	11	1.34441		316000000	0.0104434	1	1	-3.49251	295	冀中能源	54.86	C	17.55	10.69	8	14	4.62	1	1319000	matched (3)
937	2011	4880000000	37570000000	28210000000	3047000000	38050000000	21780000000	16270000000	冀中能源	1999-09-09	河北省	邢台市	桥西区			B06	煤炭开采和洗选业	0.0800777	0.572458	24.3622	12	1.3319	0.240347	200000000	0.005324	1	1	-3.4699	252	冀中能源	62.08	B	20.85	9.33	15	12	4.9	1	5737286	matched (3)
937	2012	7200000000	30070000000	21640000000	2315000000	40110000000	21880000000	18230000000	冀中能源	1999-09-09	河北省	邢台市	桥西区			B06	煤炭开采和洗选业	0.0577141	0.545574	24.4148	13	1.38938	-0.199544	281000000	0.0093401	1	1	-3.50084	38	冀中能源	77.97	B	23.27	13.88	11	20	9.82	1	4122286	matched (3)
937	2013	7260000000	25830000000	19590000000	1122000000	41100000000	23020000000	18080000000	冀中能源	1999-09-09	河北省	邢台市	桥西区			B06	煤炭开采和洗选业	0.0273081	0.560152	24.4393	14	1.31886	-0.14095	171000000	0.006603	1	1	-3.53654	122	冀中能源	73.23	B	18.89	13.34	12	20	9	1	7252286	matched (3)
937	2014	7260000000	18260000000	14540000000	-163700000	41720000000	20960000000	20760000000	冀中能源	1999-09-09	河北省	邢台市	桥西区			B06	煤炭开采和洗选业	-0.0039223	0.502378	24.4543	15	1.2557	-0.293293	308000000	0.016892	1	1	-3.57388	3202	冀中能源	8.75	D	11.61	2.14	0	0	-5	1	3032286	matched (3)
937	2015	7070000000	12540000000	11020000000	303400000	40710000000	20740000000	19960000000	冀中能源	1999-09-09	河北省	邢台市	桥西区			B06	煤炭开采和洗选业	0.0074534	0.509582	24.4297	16	1.1379	-0.313298	282000000	0.0225225	1	1	-3.61823	3245	冀中能源	7	D	10.32	1.68	0	0	-5	1	11400000	matched (3)
937	2016	7070000000	13640000000	10580000000	159800000	43520000000	23420000000	20090000000	冀中能源	1999-09-09	河北省	邢台市	桥西区			B06	煤炭开采和洗选业	0.0036723	0.538275	24.4964	17	1.28885	0.0876324	219000000	0.0160437	1	1	-3.64631	75	冀中能源	71.74	B	12.51	12.73	15	23	8.5	1	3559865	matched (3)
937	2017	7070000000	20380000000	15360000000	1090000000	45780000000	24960000000	20820000000	冀中能源	1999-09-09	河北省	邢台市	桥西区			B06	煤炭开采和洗选业	0.0238013	0.545199	24.5471	18	1.32685	0.494739	73400000	0.0036014	1	1	-3.677	1819	冀中能源	21.88	D	15.25	1.63	0	0	5	1	2946039	matched (3)
939	2010	701000000	3359000000	2367000000	434400000	9698000000	6396000000	3302000000	*ST凯迪	1999-09-23	湖北省	武汉市	江夏区			D44	电力、热力生产和供应业	0.0447902	0.659518	22.9952	11	1.41928		8840455	0.0026319	2	0	-3.58196	637	*ST凯迪	27.33	D	15.28	3	0	0	9.05	0	190000	matched (3)
939	2011	701000000	2687000000	1781000000	825300000	9440000000	6290000000	3150000000	*ST凯迪	1999-09-23	湖北省	武汉市	江夏区			D44	电力、热力生产和供应业	0.0874268	0.666357	22.9682	12	1.5082	-0.200132	6652300	0.002476	2	0	-3.62335	864	*ST凯迪	26.74	D	19.87	0.38	0	0	6.49	0		master only (1)
939	2012	701000000	2639000000	1976000000	75755169	11630000000	8563000000	3072000000	*ST凯迪	1999-09-23	湖北省	武汉市	江夏区			D44	电力、热力生产和供应业	0.006511	0.735982	23.1773	13	1.33566	-0.0176912	32600000	0.0123658	2	0	-3.65099	2043	*ST凯迪	18.4	D	8.39	0.01	0	0	10	0		master only (1)
939	2013	701000000	2209000000	1711000000	64229232	11960000000	8841000000	3115000000	*ST凯迪	1999-09-23	湖北省	武汉市	江夏区			D44	电力、热力生产和供应业	0.0053721	0.739482	23.2045	14	1.29079	-0.163067	15500000	0.0070253	2	0	-3.6891	2867	*ST凯迪	10.84	D	8.39	0.04	0	0	2.41	0		master only (1)
939	2014	727000000	2849000000	2162000000	200100000	14180000000	10810000000	3369000000	*ST凯迪	1999-09-23	湖北省	武汉市	江夏区			D44	电力、热力生产和供应业	0.0141109	0.762458	23.3752	15	1.31765	0.289697	66300000	0.0232811	2	0	-3.71583	1977	*ST凯迪	19.22	D	14.2	0.7	0	0	4.32	0		master only (1)
939	2015	728000000	3496000000	2459000000	340800000	32890000000	24960000000	7936000000	*ST凯迪	1999-09-23	湖北省	武汉市	江夏区			D44	电力、热力生产和供应业	0.0103604	0.758733	24.2165	16	1.42151	0.227102	242000000	0.06923	2	0	-3.65376	2772	*ST凯迪	15.82	D	9.51	0.44	0	0	5.87	0		master only (1)
939	2016	731000000	5001000000	3325000000	333200000	41760000000	28800000000	12960000000	*ST凯迪	1999-09-23	湖北省	武汉市	江夏区			D44	电力、热力生产和供应业	0.0079795	0.68962	24.4552	17	1.50383	0.430543	264000000	0.0528331	2	0	-3.65373	382	*ST凯迪	57.51	C	9.9	7.88	20	13	6.73	0		master only (1)
939	2017	736000000	5446000000	4908000000	-5537000000	38680000000	28300000000	5409000000	*ST凯迪	1999-09-23	湖北省	武汉市	江夏区			D44	电力、热力生产和供应业	-0.143144	0.731538	24.3786	18	1.10962	0.0889928	442000000	0.0812517	2	0	-3.70711	3552	*ST凯迪	-3.23	E	-2.04	1.26	0	0	-2.45	0		master only (1)
949	2010	744711	3560000000	3109000000	146400000	4464000000	2590000000	1874000000	新乡化纤	1999-10-21	河南省	新乡市	红旗区			C28	化学纤维制造业	0.0328086	0.580213	22.2192	11	1.14519		2765367	0.0007767	2	0	-3.59677	1968	新乡化纤	15.8	D	11.46	0.8	0	0	3.54	1	23000	matched (3)
949	2011	801111	3969000000	3543000000	6.18144e+06	4757000000	2915000000	1842000000	新乡化纤	1999-10-21	河南省	新乡市	红旗区			C28	化学纤维制造业	0.0012995	0.612815	22.2828	12	1.11998	0.11467	3990065	0.0010054	2	0	-3.63751	2504	新乡化纤	5.78	D	6.58	0.23	0	0	-1.03	1	400000	matched (3)
949	2012	801111	3411000000	3243000000	-139800000	4421000000	2719000000	1702000000	新乡化纤	1999-10-21	河南省	新乡市	红旗区			C28	化学纤维制造业	-0.031613	0.615029	22.2096	13	1.0516	-0.140578	3766750	0.0011044	2	0	-3.67663	2670	新乡化纤	6.38	D	3.13	0.71	0	0	2.54	1		master only (1)
949	2013	801111	3269000000	2885000000	30319104	4307000000	2575000000	1732000000	新乡化纤	1999-10-21	河南省	新乡市	红旗区			C28	化学纤维制造业	0.0070387	0.597839	22.1836	14	1.13342	-0.0414015	5856668	0.0017913	2	0	-3.71621	2871	新乡化纤	10.61	D	7.11	0.55	0	0	2.95	1		master only (1)
949	2014	995286	2841000000	2380000000	90558175	4469000000	2060000000	2409000000	新乡化纤	1999-10-21	河南省	新乡市	红旗区			C28	化学纤维制造业	0.0202658	0.460909	22.2203	15	1.19359	-0.131107	9118800	0.0032099	2	0	-3.75679	2980	新乡化纤	13.26	D	12.29	0.26	0	0	0.71	1		master only (1)
949	2015	995286	3066000000	2574000000	138200000	4978000000	2462000000	2516000000	新乡化纤	1999-10-21	河南省	新乡市	红旗区			C28	化学纤维制造业	0.0277621	0.494523	22.3283	16	1.19129	0.0793626	15900000	0.0051739	2	0	-3.79782	2531	新乡化纤	17.41	D	14.43	0.25	0	0	2.73	1	660000	matched (3)
949	2016	995286	3678000000	3179000000	114900000	5697000000	2124000000	3573000000	新乡化纤	1999-10-21	河南省	新乡市	红旗区			C28	化学纤维制造业	0.0201601	0.372869	22.4632	17	1.15693	0.199627	15500000	0.0042127	2	0	-3.8377	2958	新乡化纤	15.52	D	12.78	0.25	0	0	2.49	1	1600000	matched (3)
949	2017	995286	4107000000	3630000000	30630274	6479000000	2914000000	3566000000	新乡化纤	1999-10-21	河南省	新乡市	红旗区			C28	化学纤维制造业	0.0047274	0.449672	22.5919	18	1.13167	0.116643	17800000	0.0043242	2	0	-3.87612	2986	新乡化纤	14.52	D	9.26	0.26	0	0	5	1	0	matched (3)
953	2010	15400000	597000000	587700000	5.4601e+06	1118000000	972600000	145700000	*ST河化	1999-12-02	广西壮族自治区	河池市	河池市			C26	化学原料及化学制品制造业	0.0048825	0.869686	20.8351	11	1.01585		5249596	0.008793	3	0	-3.49462	2270	ST河化	7.69	D	7.28	0.41	0	0	0	1		master only (1)
953	2011	15400000	760400000	701100000	-19495235	1642000000	1323000000	319600000	*ST河化	1999-12-02	广西壮族自治区	河池市	河池市			C26	化学原料及化学制品制造业	-0.0118705	0.805427	21.2194	12	1.08447	0.273592	2641823	0.0034744	3	0	-3.57951	2524	ST河化	4.66	D	4.33	0.33	0	0	0	1		master only (1)
953	2012	15400000	914900000	881700000	-15787556	2072000000	1388000000	684200000	*ST河化	1999-12-02	广西壮族自治区	河池市	河池市			C26	化学原料及化学制品制造业	-0.0076179	0.66984	21.452	13	1.03762	0.203263	36600000	0.0400388	3	0	-3.64051	2695	ST河化	4.86	D	4.13	0.73	0	0	0	1	45180	matched (3)
953	2013	15400000	792100000	874900000	29956248	2188000000	1647000000	541500000	*ST河化	1999-12-02	广西壮族自治区	河池市	河池市			C26	化学原料及化学制品制造业	0.0136892	0.752533	21.5064	14	0.905354	-0.134231	5417000	0.0068387	3	0	-3.68474	3059	ST河化	0.54	D	-0.23	0.77	0	0	0	1	0	matched (3)
953	2014	15400000	555300000	755700000	17834293	1594000000	1354000000	239600000	*ST河化	1999-12-02	广西壮族自治区	河池市	河池市			C26	化学原料及化学制品制造业	0.0111912	0.849633	21.1893	15	0.734778	-0.298972	3009843	0.0054203	3	0	-3.69645	3205	ST河化	8.58	D	7.97	0.61	0	0	0	1	192843	matched (3)
953	2015	0	622900000	626100000	-107000000	1410000000	1301000000	108200000	*ST河化	1999-12-02	广西壮族自治区	河池市	河池市			C26	化学原料及化学制品制造业	-0.0759127	0.923224	21.0666	16	0.99486	0.121756	3318019	0.0053267	3	0	-3.72319	3494	ST河化	-0.92	E	-1.84	0.92	0	0	0	1	446119	matched (3)
953	2016	0	398300000	457800000	-141800000	785200000	874300000	-89098185	*ST河化	1999-12-02	广西壮族自治区	河池市	河池市			C26	化学原料及化学制品制造业	-0.180546	1.11347	20.4814	17	0.870051	-0.360525	1326625	0.0033305	3	0	-3.6821	3493	ST河化	0.12	D	-1.02	1.14	0	0	0	0	0	matched (3)
953	2017	0	220900000	225200000	29462411	817900000	794600000	23301440	*ST河化	1999-12-02	广西壮族自治区	河池市	河池市			C26	化学原料及化学制品制造业	0.036023	0.97151	20.5222	18	0.980977	-0.445478	51600000	0.233791	3	0	-3.72871	3272	ST河化	9.01	D	7.47	0.75	0	0	0.79	0		master only (1)
955	2010	7572597	208600000	176300000	1.52589e+06	580900000	347900000	233000000	欣龙控股	1999-12-09	海南省	澄迈县	澄迈县			C17	纺织业	0.0026266	0.59884	20.1801	11	1.18355		5462000	0.0261807	1	1	-3.38887	2199	欣龙控股	10.9	D	6.43	0.24	0	0	4.23	0		master only (1)
955	2011	7572597	205000000	184500000	-30859068	727300000	526900000	200400000	欣龙控股	1999-12-09	海南省	澄迈县	澄迈县			C17	纺织业	-0.0424303	0.724441	20.4048	12	1.11139	-0.0173283	3509883	0.0171204	1	1	-3.46931	2600	欣龙控股	0.8	D	0.82	0.19	0	0	-0.21	0		master only (1)
955	2012	7572597	227600000	189600000	590892	1060000000	328500000	731200000	欣龙控股	1999-12-09	海南省	澄迈县	澄迈县			C17	纺织业	0.0005576	0.30997	20.7812	13	1.20062	0.110377	24200000	0.106262	1	1	-3.56732	2683	欣龙控股	5.55	D	4.74	0.14	0	0	0.67	0		master only (1)
955	2013	7572597	226100000	201300000	-53584214	1007000000	334300000	673100000	欣龙控股	1999-12-09	海南省	澄迈县	澄迈县			C17	纺织业	-0.0531902	0.331803	20.7307	14	1.1234	-0.0065785	3828467	0.0169294	1	1	-3.60023	3134	欣龙控股	-6.66	E	-6.52	0.05	0	0	-0.19	0		master only (1)
955	2014	7572597	259900000	231900000	4.75337e+06	1001000000	296100000	704500000	欣龙控股	1999-12-09	海南省	澄迈县	澄迈县			C17	纺织业	0.0047505	0.295926	20.7239	15	1.12095	0.149289	17200000	0.0660787	1	1	-3.63927	3197	欣龙控股	8.97	D	4.72	0.05	0	0	4.2	0		master only (1)
955	2015	8213640	303200000	270200000	-78242071	1092000000	435700000	656000000	欣龙控股	1999-12-09	海南省	澄迈县	澄迈县			C17	纺织业	-0.0716681	0.399094	20.811	16	1.12209	0.166722	5095750	0.0168046	1	1	-3.69139	3476	欣龙控股	-0.21	E	-0.19	0.18	0	0	-0.2	0		master only (1)
955	2016	12400000	486600000	432400000	27837143	1186000000	437200000	749100000	欣龙控股	1999-12-09	海南省	澄迈县	澄迈县			C17	纺织业	0.0234661	0.368533	20.8941	17	1.12549	0.604773	3056100	0.0062802	1	1	-3.74234	2868	欣龙控股	16.38	D	8.94	0.06	0	0	7.38	0		master only (1)
955	2017	12500000	631600000	554900000	44472908	1329000000	573300000	755800000	欣龙控股	1999-12-09	海南省	澄迈县	澄迈县			C17	纺织业	0.0334613	0.43133	21.0078	18	1.13823	0.298013	4111975	0.00651	1	1	-3.79636	2116	欣龙控股	20.4	D	10.28	0.12	0	0	10	0		master only (1)
958	2010	3851090	1327000000	1179000000	28784547	1545000000	1960000000	-415100000	东方能源	1999-12-23	河北省	石家庄市	裕华区			D44	电力、热力生产和供应业	0.0186292	1.26864	21.1584	11	1.12555		29800000	0.0224746	1	1	-3.53323	2252	东方能源	8.64	D	6.78	1.86	0	0	0	1		master only (1)
958	2011	3851090	970000000	1061000000	-282800000	1417000000	2115000000	-697900000	东方能源	1999-12-23	河北省	石家庄市	裕华区			D44	电力、热力生产和供应业	-0.199525	1.4924	21.072	12	0.914373	-0.26921	112500	0.000116	1	1	-3.5638	2597	东方能源	0.87	D	-1.22	2.09	0	0	0	1		master only (1)
958	2012	3870406	857400000	879300000	-68793447	1379000000	2146000000	-766700000	东方能源	1999-12-23	河北省	石家庄市	裕华区			D44	电力、热力生产和供应业	-0.0498854	1.55594	21.0447	13	0.97508	-0.11607	22000000	0.0256294	1	1	-3.60068	2711	东方能源	3.87	D	0.87	3	0	0	0	1		master only (1)
958	2013	3078516	727800000	702300000	674100000	2265000000	1578000000	687100000	东方能源	1999-12-23	河北省	石家庄市	裕华区			D44	电力、热力生产和供应业	0.297612	0.696673	21.5409	14	1.03632	-0.151196	47500000	0.0652021	1	1	-3.6873	2672	东方能源	14.31	D	12.48	1.83	0	0	0	1		master only (1)
958	2014	2948910	777700000	667400000	197600000	2190000000	1359000000	830600000	东方能源	1999-12-23	河北省	石家庄市	裕华区			D44	电力、热力生产和供应业	0.0902294	0.62072	21.5071	15	1.16526	0.0686592	168500	0.0002167	1	1	-3.7248	3037	东方能源	12.51	D	12.51	0	0	0	0	1	95000	matched (3)
958	2015	0	2560000000	1752000000	447000000	5301000000	2981000000	2320000000	东方能源	1999-12-23	河北省	石家庄市	裕华区			D44	电力、热力生产和供应业	0.0843243	0.562373	22.3912	16	1.46121	2.2921	7916264	0.0030918	1	1	-3.79796	1198	东方能源	23.83	D	14.35	0.06	0	0	9.42	1		master only (1)
958	2016	13900000	2381000000	1857000000	284400000	5302000000	2716000000	2586000000	东方能源	1999-12-23	河北省	石家庄市	裕华区			D44	电力、热力生产和供应业	0.0536427	0.512214	22.3913	17	1.28238	-0.0701351	3729621	0.0015665	1	1	-3.83796	1036	东方能源	27.03	D	17.08	0.05	0	0	9.9	1	738500	matched (3)
958	2017	16000000	2524000000	2292000000	68907612	7470000000	4717000000	2753000000	东方能源	1999-12-23	河北省	石家庄市	裕华区			D44	电力、热力生产和供应业	0.009224	0.631424	22.7342	18	1.10114	0.0601875	4169041	0.0016517	1	1	-3.87272	1388	东方能源	23.95	D	13.91	0.04	0	0	10	1	738500	matched (3)
959	2010	31800000	27910000000	26970000000	232400000	17550000000	9146000000	8404000000	首钢股份	1999-12-16	北京市	北京市	石景山区			C31	黑色金属冶炼及压延加工业	0.0132444	0.52114	23.5883	11	1.03469		0	0	1	1	-3.53573	513	首钢股份	38.37	D	10.72	11.65	5	6	5	1		master only (1)
959	2011	195000000	12520000000	12550000000	-194900000	16490000000	8567000000	7924000000	首钢股份	1999-12-16	北京市	北京市	石景山区			C31	黑色金属冶炼及压延加工业	-0.0118212	0.519502	23.5261	12	0.997423	-0.551477	125000000	0.0099767	1	1	-3.582	2491	首钢股份	6.92	D	5.98	4	0	0	-3.06	1		master only (1)
959	2012	195000000	10100000000	10230000000	-534600000	16120000000	8319000000	7799000000	首钢股份	1999-12-16	北京市	北京市	石景山区			C31	黑色金属冶炼及压延加工业	-0.03317	0.516123	23.5032	13	0.987969	-0.192794	12300000	0.0012139	1	1	-3.62422	2647	首钢股份	7.53	D	3.52	4	0	0	0.01	1		master only (1)
959	2013	163000000	9250000000	9160000000	-341900000	15770000000	8314000000	7457000000	首钢股份	1999-12-16	北京市	北京市	石景山区			C31	黑色金属冶炼及压延加工业	-0.021678	0.52718	23.4815	14	1.00984	-0.0844461	12300000	0.0013259	1	1	-3.66629	2960	首钢股份	6.15	D	4.55	1.74	0	0	-0.14	1		master only (1)
959	2014	201000000	23990000000	22250000000	-28561509	61550000000	37640000000	23900000000	首钢股份	1999-12-16	北京市	北京市	石景山区			C31	黑色金属冶炼及压延加工业	-0.0004641	0.611595	24.8431	15	1.07779	1.59295	15600000	0.0006511	1	1	-3.49821	3083	首钢股份	11.99	D	6.01	0.98	0	0	5	1		master only (1)
959	2015	54500000	17840000000	17610000000	-1476000000	66540000000	43550000000	22990000000	首钢股份	1999-12-16	北京市	北京市	石景山区			C31	黑色金属冶炼及压延加工业	-0.0221861	0.654512	24.9211	16	1.01341	-0.256075	13700000	0.0007703	1	1	-3.52146	3276	首钢股份	5.24	D	2.89	0.83	0	0	1.52	1		master only (1)
959	2016	60500000	41850000000	37010000000	471600000	127200000000	93630000000	33580000000	首钢股份	1999-12-16	北京市	北京市	石景山区			C31	黑色金属冶炼及压延加工业	0.0037076	0.736019	25.5691	17	1.13091	1.34545	60000000	0.0014334	1	1	-3.40209	3234	首钢股份	11.7	D	6.29	1.63	0	0	3.78	1		master only (1)
959	2017	79900000	60250000000	52320000000	3107000000	134200000000	97640000000	36520000000	首钢股份	1999-12-16	北京市	北京市	石景山区			C31	黑色金属冶炼及压延加工业	0.0231622	0.727808	25.6223	18	1.15165	0.439655	24400000	0.0004049	1	1	-3.4274	3133	首钢股份	12.73	D	9.48	1.94	0	0	1.31	1		master only (1)
960	2010	446000000	9267000000	7982000000	365600000	11330000000	6694000000	4637000000	锡业股份	2000-02-21	云南省	昆明市	五华区	1	1	C32	有色金属冶炼和压延加工业	0.0322678	0.590758	23.1508	10	1.16095		55600000	0.0060029	3	0	-3.53276	344	锡业股份	52.79	C	12.93	10.63	7	20	2.23	1	0	matched (3)
960	2011	446000000	12840000000	10770000000	697800000	16550000000	11320000000	5229000000	锡业股份	2000-02-21	云南省	昆明市	五华区	1	1	C32	有色金属冶炼和压延加工业	0.0421736	0.683981	23.5294	11	1.19192	0.385742	26100000	0.0020346	3	0	-3.54168	409	锡业股份	54.1	C	15.43	10.38	12	14	2.29	1		master only (1)
960	2012	446000000	16270000000	14750000000	40189823	23450000000	18290000000	5155000000	锡业股份	2000-02-21	云南省	昆明市	五华区	1	1	C32	有色金属冶炼和压延加工业	0.0017142	0.78013	23.8779	12	1.10321	0.266854	43600000	0.0026822	3	0	-3.54215	334	锡业股份	62.72	B	9.48	12.43	15	23	2.81	1		master only (1)
960	2013	454000000	21920000000	21870000000	-1337000000	22660000000	15570000000	7088000000	锡业股份	2000-02-21	云南省	昆明市	五华区	1	1	C32	有色金属冶炼和压延加工业	-0.0589999	0.687154	23.8438	13	1.00224	0.347504	80100000	0.0036533	3	0	-3.58649	589	锡业股份	50.79	C	0.85	12.29	15	20	2.65	1	0	matched (3)
960	2014	454000000	26130000000	24540000000	37361947	22580000000	15460000000	7121000000	锡业股份	2000-02-21	云南省	昆明市	五华区	1	1	C32	有色金属冶炼和压延加工业	0.0016545	0.684656	23.8404	14	1.06513	0.192132	94000000	0.0035959	3	0	-3.62691	3053	锡业股份	12.37	D	6.58	1.18	0	0	4.61	1		master only (1)
960	2015	3870000000	31080000000	30020000000	-1773000000	27600000000	18890000000	8707000000	锡业股份	2000-02-21	云南省	昆明市	五华区	1	1	C32	有色金属冶炼和压延加工业	-0.0642469	0.684501	24.041	15	1.03539	0.189241	43000000	0.0013827	3	0	-3.64008	3503	锡业股份	-1.23	E	-0.45	2.94	0	0	-3.72	1		master only (1)
960	2016	3870000000	33430000000	31080000000	243000000	28430000000	19460000000	8961000000	锡业股份	2000-02-21	云南省	昆明市	五华区	1	1	C32	有色金属冶炼和压延加工业	0.0085482	0.684747	24.0705	16	1.07573	0.0756088	51800000	0.0015492	3	0	-3.67583	244	锡业股份	63.6	B	7.96	12.64	15	23	5	1		master only (1)
960	2017	3900000000	34410000000	30930000000	895100000	30550000000	18320000000	12230000000	锡业股份	2000-02-21	云南省	昆明市	五华区	1	1	C32	有色金属冶炼和压延加工业	0.0292977	0.59961	24.1427	17	1.11236	0.029349	54800000	0.0015935	3	0	-3.70515	3069	锡业股份	13.59	D	9.63	1.62	0	0	2.34	1		master only (1)
962	2010	20200000	1637000000	1309000000	81490163	3535000000	2265000000	1270000000	东方钽业	2000-01-20	宁夏回族自治区	石嘴山市	大武口区	2	2	C32	有色金属冶炼和压延加工业	0.0230514	0.640641	21.986	10	1.25097		32100000	0.0196272	3	0	-3.55111	288	东方钽业	55.03	C	11.96	14.04	12	15	2.03	1		master only (1)
962	2011	37400000	2324000000	1816000000	233800000	4569000000	2192000000	2376000000	东方钽业	2000-01-20	宁夏回族自治区	石嘴山市	大武口区	2	2	C32	有色金属冶炼和压延加工业	0.0511704	0.479823	22.2425	11	1.27937	0.41926	34700000	0.0149466	3	0	-3.59708	237	东方钽业	62.93	B	15.32	14.5	14	15.5	3.61	1		master only (1)
962	2012	46300000	2248000000	1974000000	102800000	4630000000	2180000000	2449000000	东方钽业	2000-01-20	宁夏回族自治区	石嘴山市	大武口区	2	2	C32	有色金属冶炼和压延加工业	0.0221946	0.470915	22.2557	12	1.13896	-0.0324333	163000000	0.0725133	3	0	-3.63724	527	东方钽业	55.72	C	14.87	12.26	11	15	2.59	1		master only (1)
962	2013	76300000	2873000000	2646000000	3.72953e+06	4742000000	2306000000	2437000000	东方钽业	2000-01-20	宁夏回族自治区	石嘴山市	大武口区	2	2	C32	有色金属冶炼和压延加工业	0.0007864	0.48616	22.2798	13	1.08604	0.277938	39700000	0.0138106	3	0	-3.67748	466	东方钽业	60.61	B	12.31	11.3	12	20	5	1		master only (1)
962	2014	127000000	2453000000	2417000000	-336700000	4111000000	2024000000	2087000000	东方钽业	2000-01-20	宁夏回族自治区	石嘴山市	大武口区	2	2	C32	有色金属冶炼和压延加工业	-0.0819003	0.49225	22.137	14	1.01459	-0.146457	26200000	0.0106718	3	0	-3.71531	3424	东方钽业	-0.35	E	-1.21	0.13	0	0	0.73	1		master only (1)
962	2015	147000000	1081000000	1210000000	-636200000	3168000000	1713000000	1455000000	东方钽业	2000-01-20	宁夏回族自治区	石嘴山市	大武口区	2	2	C32	有色金属冶炼和压延加工业	-0.20081	0.54062	21.8765	15	0.893472	-0.559238	28500000	0.0263489	3	0	-3.74683	3513	东方钽业	-1.54	E	-2.96	0.08	0	0	1.34	1	40000	matched (3)
962	2016	147000000	871100000	946300000	29251625	2821000000	1332000000	1489000000	东方钽业	2000-01-20	宁夏回族自治区	石嘴山市	大武口区	2	2	C32	有色金属冶炼和压延加工业	0.0103691	0.472265	21.7604	16	0.920587	-0.194146	13600000	0.015617	3	0	-3.78117	285	东方钽业	61.87	B	6.19	11.18	15	23	6.5	1	0	matched (3)
962	2017	151000000	945100000	932900000	-380000000	2043000000	933500000	1110000000	东方钽业	2000-01-20	宁夏回族自治区	石嘴山市	大武口区	2	2	C32	有色金属冶炼和压延加工业	-0.185986	0.456908	21.4377	17	1.01307	0.0848746	12700000	0.0134273	3	0	-3.79935	3546	东方钽业	-2.96	E	-3.15	0.19	0	0	0	1		master only (1)
966	2010	255000000	7276000000	6912000000	-295300000	15140000000	13310000000	1829000000	长源电力	2000-03-16	湖北省	武汉市	洪山区			D44	电力、热力生产和供应业	-0.0195072	0.879174	23.4405	10	1.05267		36600000	0.0050267	2	0	-3.51008	2366	长源电力	-1.11	E	2.77	0.64	0	0	-4.52	1		master only (1)
966	2011	256000000	7908000000	7777000000	59085381	14460000000	12720000000	1743000000	长源电力	2000-03-16	湖北省	武汉市	洪山区			D44	电力、热力生产和供应业	0.0040848	0.879518	23.395	11	1.01682	0.0868042	3722376	0.0004707	2	0	-3.55412	2187	长源电力	15.59	D	6.6	0.56	0	0	8.43	1	483000	matched (3)
966	2012	272000000	7178000000	6347000000	128700000	12360000000	10500000000	1859000000	长源电力	2000-03-16	湖北省	武汉市	洪山区			D44	电力、热力生产和供应业	0.0104095	0.849596	23.2378	12	1.13085	-0.0922806	18100000	0.0025216	2	0	-3.60671	2430	长源电力	14.3	D	6.94	0.39	0	0	6.97	1	3797700	matched (3)
966	2013	277000000	7575000000	6003000000	358600000	11160000000	8950000000	2213000000	长源电力	2000-03-16	湖北省	武汉市	洪山区			D44	电力、热力生产和供应业	0.0321212	0.801721	23.1359	13	1.26201	0.0553566	10800000	0.001424	2	0	-3.65373	1984	长源电力	19.3	D	11.83	0.52	0	0	6.95	1	0	matched (3)
966	2014	279000000	6596000000	5019000000	789200000	10390000000	7863000000	2530000000	长源电力	2000-03-16	湖北省	武汉市	洪山区			D44	电力、热力生产和供应业	0.0759405	0.756603	23.0644	14	1.31413	-0.129291	3795996	0.0005755	2	0	-3.69813	1617	长源电力	20.93	D	14.27	0.47	0	0	6.19	1	620000	matched (3)
966	2015	283000000	6121000000	4151000000	952500000	9582000000	6142000000	3440000000	长源电力	2000-03-16	湖北省	武汉市	洪山区			D44	电力、热力生产和供应业	0.0994072	0.640998	22.9831	15	1.47463	-0.0719479	158000000	0.0258364	2	0	-3.74259	350	长源电力	34.01	D	23.36	0.65	0	0	10	1	3300000	matched (3)
966	2016	287000000	5378000000	4437000000	397000000	9185000000	5538000000	3647000000	长源电力	2000-03-16	湖北省	武汉市	洪山区			D44	电力、热力生产和供应业	0.0432199	0.602911	22.9409	16	1.21192	-0.121472	13300000	0.0024796	2	0	-3.78469	872	长源电力	28.6	D	17.59	1.01	0	0	10	1	0	matched (3)
966	2017	293000000	5464000000	5319000000	-121700000	9357000000	5945000000	3412000000	长源电力	2000-03-16	湖北省	武汉市	洪山区			D44	电力、热力生产和供应业	-0.0130106	0.63537	22.9594	17	1.02719	0.016054	8017524	0.0014673	2	0	-3.82379	3340	长源电力	5.96	D	5.04	0.71	0	0	0.21	1		master only (1)
968	2010	645000000	3523000000	2500000000	316300000	6672000000	2935000000	3737000000	蓝焰控股	2000-06-22	山西省	太原市	万柏林区			B07	石油和天然气开采业	0.0474088	0.439849	22.6211	10	1.40914		2833329	0.0008041	2	0	-3.55557	102	蓝焰控股	62.76	B	14.45	6.31	13	24	5	1	750000	matched (3)
968	2011	773000000	3779000000	2758000000	304600000	7620000000	3594000000	4025000000	蓝焰控股	2000-06-22	山西省	太原市	万柏林区			B07	石油和天然气开采业	0.0399796	0.471722	22.754	11	1.37024	0.0725885	4253330	0.0011255	2	0	-3.59211	140	蓝焰控股	68.03	B	14.01	9.52	15	23	6.5	1	750000	matched (3)
968	2012	1120000000	3312000000	2748000000	-311600000	9454000000	5969000000	3486000000	蓝焰控股	2000-06-22	山西省	太原市	万柏林区			B07	石油和天然气开采业	-0.0329547	0.631306	22.9697	12	1.20531	-0.123541	41700000	0.0125906	2	0	-3.62327	645	蓝焰控股	36.74	D	2.47	11.27	12	14	-3	1	5325000	matched (3)
968	2013	1120000000	2086000000	1861000000	4093562	11710000000	8162000000	3546000000	蓝焰控股	2000-06-22	山西省	太原市	万柏林区			B07	石油和天然气开采业	0.0003496	0.697114	23.1836	13	1.12042	-0.370334	1367844	0.0006558	2	0	-3.65055	2698	蓝焰控股	13.86	D	6.14	2.72	0	0	5	1	0	matched (3)
968	2014	1130000000	1724000000	1864000000	-1125000000	15430000000	12560000000	2872000000	蓝焰控股	2000-06-22	山西省	太原市	万柏林区			B07	石油和天然气开采业	-0.072933	0.813914	23.4596	14	0.924654	-0.173601	1357143	0.0007874	2	0	-3.66832	3372	蓝焰控股	1.63	D	-1.69	2.89	0	0	0.43	1		master only (1)
968	2015	1130000000	1655000000	2332000000	-2053000000	12500000000	11770000000	736000000	蓝焰控股	2000-06-22	山西省	太原市	万柏林区			B07	石油和天然气开采业	-0.164214	0.941144	23.2493	15	0.709697	-0.0398835	1451767	0.0008773	2	0	-3.72586	256	蓝焰控股	51.5	C	-3.86	15	12	27	1.36	1		master only (1)
968	2016	4541443	1251000000	912700000	379500000	6226000000	4740000000	1486000000	蓝焰控股	2000-06-22	山西省	太原市	万柏林区			B07	石油和天然气开采业	0.0609595	0.761326	22.552	16	1.37064	-0.244061	611000000	0.488449	2	0	-3.79676	85	蓝焰控股	71.2	B	12.66	14.69	15	26.5	2.35	1		master only (1)
968	2017	5076339	1904000000	1256000000	475300000	7353000000	4092000000	3261000000	蓝焰控股	2000-06-22	山西省	太原市	万柏林区			B07	石油和天然气开采业	0.0646493	0.556514	22.7183	17	1.51616	0.521812	361000000	0.189731	2	0	-3.83319	1647	蓝焰控股	22.75	D	15.1	3.88	0	0	3.77	1		master only (1)
973	2010	17300000	3752000000	3171000000	250700000	4456000000	2822000000	1634000000	佛塑科技	2000-05-25	广东省	佛山市	禅城区			C29	橡胶和塑料制品业	0.0562614	0.633341	22.2176	10	1.18326		3961359	0.0010558	1	1	-3.55675	1922	佛塑科技	16.46	D	12.07	2.15	0	0	2.24	1		master only (1)
973	2011	7771664	3869000000	3388000000	564500000	5133000000	3085000000	2048000000	佛塑科技	2000-05-25	广东省	佛山市	禅城区			C29	橡胶和塑料制品业	0.109969	0.60094	22.359	11	1.14195	0.0312658	7662538	0.0019804	1	1	-3.59793	1744	佛塑科技	19.38	D	16.41	2.17	0	0	0.8	1		master only (1)
973	2012	8635797	3772000000	3247000000	123300000	4689000000	2543000000	2145000000	佛塑科技	2000-05-25	广东省	佛山市	禅城区			C29	橡胶和塑料制品业	0.0262909	0.542451	22.2684	12	1.16181	-0.0251427	9075708	0.0024061	1	1	-3.63737	1942	佛塑科技	19.02	D	13.25	1.37	0	0	4.4	1		master only (1)
973	2013	9076501	3019000000	2509000000	104800000	5106000000	2817000000	2289000000	佛塑科技	2000-05-25	广东省	佛山市	禅城区			C29	橡胶和塑料制品业	0.0205267	0.551685	22.3538	13	1.2034	-0.199538	11900000	0.0039483	1	1	-3.67792	2355	佛塑科技	17.51	D	11.71	1.56	0	0	4.24	1		master only (1)
973	2014	9370128	2731000000	2290000000	111600000	5214000000	2973000000	2241000000	佛塑科技	2000-05-25	广东省	佛山市	禅城区			C29	橡胶和塑料制品业	0.0214061	0.570254	22.3747	14	1.19278	-0.0953094	4072999	0.0014911	1	1	-3.71795	2942	佛塑科技	13.65	D	8.53	2.22	0	0	2.9	1		master only (1)
973	2015	11400000	2887000000	2358000000	125500000	4880000000	2536000000	2344000000	佛塑科技	2000-05-25	广东省	佛山市	禅城区			C29	橡胶和塑料制品业	0.0257217	0.519717	22.3084	15	1.22441	0.0569066	9295583	0.0032199	1	1	-3.75771	2217	佛塑科技	18.77	D	12.7	2.45	0	0	3.62	1		master only (1)
973	2016	19900000	2466000000	1856000000	156700000	4872000000	2423000000	2449000000	佛塑科技	2000-05-25	广东省	佛山市	禅城区			C29	橡胶和塑料制品业	0.0321598	0.497365	22.3067	16	1.32871	-0.145945	12500000	0.0050585	1	1	-3.79769	2536	佛塑科技	18.39	D	13.6	2.69	0	0	2.1	1		master only (1)
973	2017	23100000	2512000000	1968000000	118100000	5582000000	3144000000	2438000000	佛塑科技	2000-05-25	广东省	佛山市	禅城区			C29	橡胶和塑料制品业	0.0211509	0.563213	22.4427	17	1.27658	0.0187305	14400000	0.0057402	1	1	-3.83782	2903	佛塑科技	15.3	D	11.73	2.5	0	0	1.07	1		master only (1)
975	2010	0	231500000	165300000	-22856154	1166000000	256800000	908800000	银泰资源	2000-06-08	内蒙古自治区	锡林郭勒盟	西乌珠穆沁旗			B09	有色金属矿采选业	-0.0196084	0.220304	20.8765	10	1.40066		1038997	0.0044874	3	0	-3.46008	2361	银泰资源	0.21	D	7.21	3	0	0	-10	0		master only (1)
975	2011	0	243300000	146700000	29939520	1227000000	240200000	987000000	银泰资源	2000-06-08	内蒙古自治区	锡林郭勒盟	西乌珠穆沁旗			B09	有色金属矿采选业	0.024397	0.195728	20.928	11	1.65872	0.0507068	0	0	3	0	-3.50664	2310	银泰资源	13.54	D	11.76	3	0	0	-1.22	0		master only (1)
975	2012	0	256200000	146100000	16286728	1658000000	664400000	993900000	银泰资源	2000-06-08	内蒙古自治区	锡林郭勒盟	西乌珠穆沁旗			B09	有色金属矿采选业	0.0098215	0.400626	21.2291	12	1.75315	0.0530478	0	0	3	0	-3.58047	875	银泰资源	28.26	D	15.26	3	0	0	10	0		master only (1)
975	2013	2820000000	593700000	74458960	561800000	4786000000	219500000	4566000000	银泰资源	2000-06-08	内蒙古自治区	锡林郭勒盟	西乌珠穆沁旗			B09	有色金属矿采选业	0.117403	0.0458645	22.2889	13	7.97398	1.31765	0	0	3	0	-3.67756	736	银泰资源	30.71	D	23.05	2.38	0	0	5.28	0		master only (1)
975	2014	2840000000	726100000	128100000	352800000	4944000000	289800000	4654000000	银泰资源	2000-06-08	内蒙古自治区	锡林郭勒盟	西乌珠穆沁旗			B09	有色金属矿采选业	0.0713655	0.0586206	22.3213	14	5.66895	0.222975	0	0	3	0	-3.71778	435	银泰资源	28.89	D	20.04	2.37	0	0	6.48	0		master only (1)
975	2015	2880000000	730900000	160800000	324700000	4908000000	256600000	4651000000	银泰资源	2000-06-08	内蒙古自治区	锡林郭勒盟	西乌珠穆沁旗			B09	有色金属矿采选业	0.0661632	0.0522958	22.314	15	4.54546	0.0065534	68400	9.36e-05	3	0	-3.75774	492	银泰资源	30.11	D	20.16	3	0	0	6.95	0	68400	matched (3)
975	2016	2900000000	761900000	173200000	294900000	4895000000	215600000	4680000000	银泰资源	2000-06-08	内蒙古自治区	锡林郭勒盟	西乌珠穆沁旗			B09	有色金属矿采选业	0.0602376	0.0440368	22.3115	16	4.39951	0.0423759	3034200	0.0039827	3	0	-3.79772	1712	银泰资源	22.6	D	12.64	3	0	0	6.96	0	34200	matched (3)
975	2017	2920000000	2227000000	1229000000	508800000	11320000000	1326000000	9992000000	银泰资源	2000-06-08	内蒙古自治区	锡林郭勒盟	西乌珠穆沁旗			B09	有色金属矿采选业	0.0449548	0.117174	23.1497	17	1.81187	1.92346	34200	1.54e-05	3	0	-3.81284	641	银泰资源	27.88	D	18.56	3	0	0	6.32	0	34200	matched (3)
982	2010	460800	1177000000	930900000	74542434	2224000000	1799000000	425200000	*ST中绒	2000-07-06	宁夏回族自治区	银川市	灵武市			C17	纺织业	0.0335109	0.808854	21.5228	10	1.26439		42900000	0.0364252	3	0	-3.52597	2061	*ST中绒	14.58	D	12.37	0.17	0	0	2.04	0		master only (1)
982	2011	736868	1809000000	1428000000	166300000	3640000000	2803000000	837000000	*ST中绒	2000-07-06	宁夏回族自治区	银川市	灵武市			C17	纺织业	0.0456972	0.770045	22.0152	11	1.26695	0.537358	62700000	0.034649	3	0	-3.59207	2051	*ST中绒	17.17	D	13.75	0.1	0	0	3.32	0		master only (1)
982	2012	736868	2426000000	1820000000	279400000	5053000000	3335000000	1717000000	*ST中绒	2000-07-06	宁夏回族自治区	银川市	灵武市			C17	纺织业	0.0552915	0.660087	22.3432	12	1.33303	0.340759	85200000	0.0351305	3	0	-3.63788	2037	*ST中绒	18.43	D	13.56	0.09	0	0	4.78	0		master only (1)
982	2013	949352	3111000000	2443000000	281200000	8539000000	6569000000	1969000000	*ST中绒	2000-07-06	宁夏回族自治区	银川市	灵武市			C17	纺织业	0.032931	0.769353	22.8679	13	1.2731	0.282182	126000000	0.0405837	3	0	-3.66795	1901	*ST中绒	19.73	D	15.55	0.04	0	0	4.14	0	160000	matched (3)
982	2014	15400000	3104000000	2577000000	89483814	12950000000	8720000000	4233000000	*ST中绒	2000-07-06	宁夏回族自治区	银川市	灵武市			C17	纺织业	0.0069082	0.673204	23.2846	14	1.20425	-0.0022884	102000000	0.0327151	3	0	-3.68318	2968	*ST中绒	13.38	D	7.26	0.16	0	0	5.96	0		master only (1)
982	2015	15500000	3177000000	2793000000	-876500000	13560000000	10190000000	3374000000	*ST中绒	2000-07-06	宁夏回族自治区	银川市	灵武市			C17	纺织业	-0.0646205	0.751228	23.3306	15	1.13767	0.0237095	110000000	0.0347712	3	0	-3.71953	3498	*ST中绒	-1.04	E	-1.8	0.16	0	0	0.6	0	40000	matched (3)
982	2016	227000000	3312000000	2927000000	-1061000000	11610000000	9730000000	1878000000	*ST中绒	2000-07-06	宁夏回族自治区	银川市	灵武市			C17	纺织业	-0.0914369	0.838204	23.175	16	1.13184	0.0426021	94000000	0.0283917	3	0	-3.77114	3573	*ST中绒	-6.02	E	-2.9	0.31	0	0	-3.43	0	0	matched (3)
982	2017	16400000	2797000000	2512000000	46993342	12160000000	10240000000	1913000000	*ST中绒	2000-07-06	宁夏回族自治区	银川市	灵武市			C17	纺织业	0.0038658	0.842623	23.2211	17	1.11319	-0.155743	699000000	0.249927	3	0	-3.80792	3277	*ST中绒	8.74	D	-1.54	0.28	0	0	10	0		master only (1)
983	2010	159000000	16940000000	9588000000	2794000000	28950000000	14860000000	14090000000	西山煤电	2000-07-26	山西省	太原市	万柏林区			B06	煤炭开采和洗选业	0.0964886	0.513272	24.0889	10	1.76704		37500000	0.0022123	2	0	-3.43316	140	西山煤电	60.57	B	18.88	13.69	9	14	5	1	404537	matched (3)
983	2011	1960000000	30370000000	21180000000	3005000000	38640000000	22110000000	16530000000	西山煤电	2000-07-26	山西省	太原市	万柏林区			B06	煤炭开采和洗选业	0.0777657	0.57215	24.3776	11	1.434	0.792692	6428343	0.0002117	2	0	-3.42727	20	西山煤电	78.58	B	21.51	12.14	12	24	8.93	1	220820	matched (3)
983	2012	1990000000	31230000000	22380000000	1995000000	45130000000	27520000000	17600000000	西山煤电	2000-07-26	山西省	太原市	万柏林区			B06	煤炭开采和洗选业	0.0442132	0.609906	24.5327	12	1.3956	0.0281954	56200000	0.0017998	2	0	-3.43966	186	西山煤电	68.5	B	16.5	12.5	10	20	9.5	1	6779241	matched (3)
983	2013	2740000000	29500000000	21230000000	1274000000	46160000000	27350000000	18820000000	西山煤电	2000-07-26	山西省	太原市	万柏林区			B06	煤炭开采和洗选业	0.0275931	0.592377	24.5554	13	1.38938	-0.0553543	48000000	0.0016277	2	0	-3.47545	331	西山煤电	65.8	B	14.49	15	12	20	4.31	1	671015	matched (3)
983	2014	2780000000	24390000000	17790000000	350000000	48200000000	29490000000	18710000000	西山煤电	2000-07-26	山西省	太原市	万柏林区			B06	煤炭开采和洗选业	0.0072618	0.611846	24.5986	14	1.37121	-0.173193	26500000	0.0010845	2	0	-3.50732	2526	西山煤电	16.93	D	8.48	4	0	0	4.45	1	280616	matched (3)
983	2015	2880000000	18660000000	12620000000	210600000	52230000000	33250000000	18980000000	西山煤电	2000-07-26	山西省	太原市	万柏林区			B06	煤炭开采和洗选业	0.0040325	0.636522	24.6789	15	1.47835	-0.235032	35700000	0.0019153	2	0	-3.53174	2607	西山煤电	17.03	D	8.03	4	0	0	5	1	413950	matched (3)
983	2016	2970000000	19610000000	13440000000	451000000	53880000000	34500000000	19380000000	西山煤电	2000-07-26	山西省	太原市	万柏林区			B06	煤炭开采和洗选业	0.0083692	0.640298	24.7101	16	1.45884	0.0510592	77500000	0.0039513	2	0	-3.56556	260	西山煤电	62.72	B	10.22	13	12	20	7.5	1	413950	matched (3)
983	2017	3280000000	28660000000	19070000000	1838000000	57860000000	36660000000	21190000000	西山煤电	2000-07-26	山西省	太原市	万柏林区			B06	煤炭开采和洗选业	0.0317626	0.633695	24.7812	17	1.50268	0.461188	54400000	0.0018983	2	0	-3.59111	1734	西山煤电	22.31	D	13.38	3.93	0	0	5	1	0	matched (3)
985	2010	22400000	1036000000	911500000	26340355	520300000	45023457	475200000	大庆华科	2000-07-26	黑龙江省	大庆市	大庆市			C26	化学原料及化学制品制造业	0.0506291	0.0865401	20.0698	10	1.13707		839006	0.0008095	2	0	-3.32743	2091	大庆华科	14.17	D	11.5	0.18	0	0	2.49	1		master only (1)
985	2011	22400000	1154000000	1029000000	25036320	581600000	92893007	488700000	大庆华科	2000-07-26	黑龙江省	大庆市	大庆市			C26	化学原料及化学制品制造业	0.0430444	0.159709	20.1814	11	1.12157	0.113122	30900000	0.0268128	2	0	-3.3891	1977	大庆华科	17.79	D	15.21	0.21	0	0	2.37	1		master only (1)
985	2012	22500000	1194000000	1093000000	-1.60775e+06	600200000	127800000	472400000	大庆华科	2000-07-26	黑龙江省	大庆市	大庆市			C26	化学原料及化学制品制造业	-0.0026787	0.212865	20.2128	12	1.09214	0.0348032	572220	0.0004793	2	0	-3.43501	2539	大庆华科	11.84	D	6.54	0.3	0	0	5	1		master only (1)
985	2013	22500000	1175000000	1067000000	10307398	614200000	119300000	494900000	大庆华科	2000-07-26	黑龙江省	大庆市	大庆市			C26	化学原料及化学制品制造业	0.0167825	0.194188	20.2358	13	1.10156	-0.0154169	355082	0.0003021	2	0	-3.47929	2693	大庆华科	13.99	D	11.7	0.4	0	0	1.89	1		master only (1)
985	2014	22800000	1423000000	1290000000	13917606	635100000	133100000	501900000	大庆华科	2000-07-26	黑龙江省	大庆市	大庆市			C26	化学原料及化学制品制造业	0.0219149	0.20966	20.2693	14	1.10321	0.21053	600844	0.0004223	2	0	-3.52542	2719	大庆华科	15.68	D	12.86	0.48	0	0	2.34	1		master only (1)
985	2015	22800000	789600000	703100000	-16630942	607500000	125400000	482100000	大庆华科	2000-07-26	黑龙江省	大庆市	大庆市			C26	化学原料及化学制品制造业	-0.0273771	0.206367	20.2248	15	1.12308	-0.445067	1014408	0.0012847	2	0	-3.55725	3212	大庆华科	8.4	D	4.99	0.56	0	0	2.85	1		master only (1)
985	2016	26400000	1033000000	888500000	33341965	662800000	144400000	518300000	大庆华科	2000-07-26	黑龙江省	大庆市	大庆市			C26	化学原料及化学制品制造业	0.0503062	0.217935	20.3119	16	1.16204	0.307663	2904184	0.0028127	2	0	-3.61312	2467	大庆华科	18.72	D	15.44	0.61	0	0	2.67	1		master only (1)
985	2017	22400000	1530000000	1375000000	48155136	700600000	146900000	553700000	大庆华科	2000-07-26	黑龙江省	大庆市	大庆市			C26	化学原料及化学制品制造业	0.0687388	0.20967	20.3674	17	1.11325	0.482219	1902057	0.0012428	2	0	-3.66287	1838	大庆华科	21.81	D	18.41	0.64	0	0	2.76	1		master only (1)
990	2010	76000000	3140000000	2910000000	17591034	3546000000	1915000000	1631000000	诚志股份	2000-07-06	江西省	南昌市	青山湖区	1	1	C26	化学原料及化学制品制造业	0.0049603	0.540054	21.9892	10	1.07907		6022158	0.0019178	2	0	-3.55121	1586	诚志股份	19.22	D	10.61	1.02	0	0	7.59	1		master only (1)
990	2011	183000000	2987000000	2761000000	30415475	3351000000	1694000000	1656000000	诚志股份	2000-07-06	江西省	南昌市	青山湖区	1	1	C26	化学原料及化学制品制造业	0.0090776	0.505699	21.9324	11	1.08199	-0.0488302	71800000	0.0240505	2	0	-3.58914	2059	诚志股份	17.11	D	10.25	0.65	0	0	6.21	1		master only (1)
990	2012	181000000	3383000000	3111000000	25473484	3034000000	1383000000	1650000000	诚志股份	2000-07-06	江西省	南昌市	青山湖区	1	1	C26	化学原料及化学制品制造业	0.0083973	0.455937	21.833	12	1.08754	0.132705	16000000	0.0047169	2	0	-3.62484	1737	诚志股份	20.43	D	9.96	0.47	0	0	10	1		master only (1)
990	2013	191000000	4000000000	3673000000	52537514	3330000000	1636000000	1694000000	诚志股份	2000-07-06	江西省	南昌市	青山湖区	1	1	C26	化学原料及化学制品制造业	0.0157768	0.491433	21.9262	13	1.08909	0.182289	11000000	0.0027617	2	0	-3.6689	1613	诚志股份	21.54	D	10.94	0.6	0	0	10	1		master only (1)
990	2014	233000000	4011000000	3665000000	76821905	3921000000	1579000000	2342000000	诚志股份	2000-07-06	江西省	南昌市	青山湖区	1	1	C26	化学原料及化学制品制造业	0.0195931	0.402611	22.0896	14	1.09436	0.0027307	10400000	0.0025879	2	0	-3.7142	2819	诚志股份	14.86	D	9.69	1.66	0	0	3.51	1		master only (1)
990	2015	279000000	4042000000	3616000000	147700000	4928000000	2305000000	2623000000	诚志股份	2000-07-06	江西省	南昌市	青山湖区	1	1	C26	化学原料及化学制品制造业	0.029974	0.467764	22.3183	15	1.11796	0.0078775	26600000	0.0065724	2	0	-3.75777	2078	诚志股份	19.35	D	10.98	1.19	0	0	7.18	1		master only (1)
990	2016	711000000	2574000000	1916000000	146000000	20150000000	4632000000	15520000000	诚志股份	2000-07-06	江西省	南昌市	青山湖区	1	1	C26	化学原料及化学制品制造业	0.0072434	0.22986	23.7265	16	1.34317	-0.363248	29500000	0.011468	2	0	-3.72061	2373	诚志股份	19.21	D	9.87	1.89	0	0	7.45	1		master only (1)
990	2017	712000000	5695000000	3830000000	785800000	21020000000	4955000000	16070000000	诚志股份	2000-07-06	江西省	南昌市	青山湖区	1	1	C26	化学原料及化学制品制造业	0.0373828	0.235712	23.7688	17	1.48672	1.21237	22600000	0.0039713	2	0	-3.75565	827	诚志股份	26.77	D	18.37	2.49	0	0	5.91	1		master only (1)
993	2010	27100000	509400000	282300000	99474352	2787000000	1168000000	1619000000	闽东电力	2000-07-31	福建省	宁德市	蕉城区	1	1	D44	电力、热力生产和供应业	0.0356986	0.418984	21.748	10	1.80436		0	0	1	1	-3.5405	146	闽东电力	60.21	B	13.98	9.88	13	11	12.35	1		master only (1)
993	2011	21800000	384900000	255600000	14669824	2801000000	1215000000	1586000000	闽东电力	2000-07-31	福建省	宁德市	蕉城区	1	1	D44	电力、热力生产和供应业	0.0052376	0.433826	21.7532	11	1.50583	-0.244406	1204192	0.0031283	1	1	-3.58078	307	闽东电力	59.53	C	11.76	8.77	20	9	10	1		master only (1)
993	2012	12400000	1237000000	938900000	54790177	3593000000	1953000000	1640000000	闽东电力	2000-07-31	福建省	宁德市	蕉城区	1	1	D44	电力、热力生产和供应业	0.0152486	0.543641	22.0023	12	1.31743	2.21333	1050251	0.0008491	1	1	-3.63165	516	闽东电力	56.08	C	9.98	8.94	17	11	9.16	1		master only (1)
993	2013	13600000	1678000000	1209000000	61914699	4187000000	2483000000	1704000000	闽东电力	2000-07-31	福建省	宁德市	蕉城区	1	1	D44	电力、热力生产和供应业	0.0147889	0.592986	22.1551	13	1.38818	0.356997	3695825	0.0022019	1	1	-3.67568	365	闽东电力	64.63	B	14.6	9.03	18	13	10	1		master only (1)
993	2014	14000000	1159000000	619300000	20263874	3857000000	2306000000	1551000000	闽东电力	2000-07-31	福建省	宁德市	蕉城区	1	1	D44	电力、热力生产和供应业	0.0052538	0.597812	22.0731	14	1.87205	-0.309224	3743730	0.0032289	1	1	-3.71377	114	闽东电力	55.56	C	9.56	9	16	11	10	1		master only (1)
993	2015	14100000	910100000	491100000	14830652	3421000000	1855000000	1566000000	闽东电力	2000-07-31	福建省	宁德市	蕉城区	1	1	D44	电力、热力生产和供应业	0.0043357	0.542179	21.9531	15	1.85326	-0.215032	3978157	0.004371	1	1	-3.74993	1716	闽东电力	21.1	D	8.1	3	0	0	10	1		master only (1)
993	2016	14200000	645400000	278200000	19362064	3865000000	2250000000	1615000000	闽东电力	2000-07-31	福建省	宁德市	蕉城区	1	1	D44	电力、热力生产和供应业	0.0050102	0.582097	22.0751	16	2.32034	-0.290858	1669929	0.0025874	1	1	-3.79382	16	闽东电力	79.51	B	12.51	10	20	18.5	18.5	1		master only (1)
993	2017	15700000	901400000	584000000	22067481	4454000000	2132000000	2321000000	闽东电力	2000-07-31	福建省	宁德市	蕉城区	1	1	D44	电力、热力生产和供应业	0.004955	0.47875	22.217	17	1.54354	0.396622	7440422	0.0082543	1	1	-3.83674	2069	闽东电力	20.6	D	7.93	2.67	0	0	10	1		master only (1)
1896	2010	1261942	4238000000	3842000000	30647870	6795000000	5980000000	815600000	豫能控股	1998-01-22	河南省	郑州市	金水区	1	2	D44	电力、热力生产和供应业	0.00451	0.879983	22.6395	12	1.10326		19400000	0.0045832	2	0	-3.63518	2068	豫能控股	14.51	D	7.81	3	0	0	3.7	1	9425373	matched (3)
1896	2011	2434380	4411000000	4011000000	24876327	6066000000	5265000000	801000000	豫能控股	1998-01-22	河南省	郑州市	金水区	1	2	D44	电力、热力生产和供应业	0.0041011	0.867941	22.5259	13	1.09991	0.0408441	47400000	0.0107543	2	0	-3.67711	2489	豫能控股	7.14	D	5.63	1.48	0	0	0.03	1	3333333	matched (3)
1896	2012	2490746	3802000000	3388000000	50559714	5079000000	4227000000	851600000	豫能控股	1998-01-22	河南省	郑州市	金水区	1	2	D44	电力、热力生产和供应业	0.0099547	0.832327	22.3484	14	1.1222	-0.138147	533333	0.0001403	2	0	-3.7179	2594	豫能控股	10.04	D	6.84	3	0	0	0.2	1	333333	matched (3)
1896	2013	3035736	3500000000	2755000000	346700000	4686000000	3490000000	1196000000	豫能控股	1998-01-22	河南省	郑州市	金水区	1	2	D44	电力、热力生产和供应业	0.0739806	0.744771	22.2679	15	1.2707	-0.0793865	533333	0.0001524	2	0	-3.75737	1918	豫能控股	19.64	D	12.35	2.95	0	0	4.34	1	333333	matched (3)
1896	2014	5366724	3356000000	2454000000	471100000	12140000000	8426000000	3715000000	豫能控股	1998-01-22	河南省	郑州市	金水区	1	2	D44	电力、热力生产和供应业	0.0388037	0.693992	23.2199	16	1.36757	-0.0412107	419000	0.0001249	2	0	-3.76801	1638	豫能控股	20.84	D	12.4	1.1	0	0	7.34	1	333333	matched (3)
1896	2015	6027978	3656000000	2314000000	624700000	13140000000	8714000000	4421000000	豫能控股	1998-01-22	河南省	郑州市	金水区	1	2	D44	电力、热力生产和供应业	0.0475566	0.663397	23.2986	17	1.57954	0.0892665	29000000	0.007929	2	0	-3.80209	1050	豫能控股	24.73	D	14.23	0.99	0	0	9.51	1	333333	matched (3)
1896	2016	7696657	5915000000	4760000000	484400000	14430000000	9507000000	4925000000	豫能控股	1998-01-22	河南省	郑州市	金水区	1	2	D44	电力、热力生产和供应业	0.0335669	0.658767	23.3927	18	1.24263	0.6181	1412949	0.0002389	2	0	-3.83432	1598	豫能控股	23.27	D	12.04	1.8	0	0	9.43	1	333333	matched (3)
1896	2017	108000000	8760000000	8299000000	26162001	20900000000	13560000000	7337000000	豫能控股	1998-01-22	河南省	郑州市	金水区	1	2	D44	电力、热力生产和供应业	0.001252	0.648876	23.7628	19	1.05559	0.481036	74800000	0.0085397	2	0	-3.83636	3188	豫能控股	11.71	D	6.57	1.94	0	0	3.2	1	333333	matched (3)
2002	2010	1667670	203000000	203800000	-68263251	281700000	191200000	90489456	鸿达兴业	2004-06-25	江苏省	扬州市	广陵区			C26	化学原料及化学制品制造业	-0.242363	0.678725	19.4562	6	0.996105		349300	0.0017204	1	1	-3.02904	2333	鸿达兴业	2.72	D	-0.69	3.41	0	0	0	0		master only (1)
2002	2011	1667670	180900000	179600000	2.90659e+06	258700000	162100000	96607143	鸿达兴业	2004-06-25	江苏省	扬州市	广陵区			C26	化学原料及化学制品制造业	0.0112335	0.62663	19.3713	7	1.00713	-0.109038	8677250	0.0479672	1	1	-3.04736	2478	鸿达兴业	7.91	D	4.14	3.77	0	0	0	0		master only (1)
2002	2012	1667670	208300000	194600000	2.22818e+06	301300000	203600000	97679652	鸿达兴业	2004-06-25	江苏省	扬州市	广陵区			C26	化学原料及化学制品制造业	0.0073958	0.675782	19.5235	8	1.07041	0.151193	13100000	0.0628757	1	1	-3.12581	2645	鸿达兴业	7.67	D	5.09	2.58	0	0	0	0		master only (1)
2002	2013	1023145	2417000000	1806000000	295600000	7049000000	4570000000	2478000000	鸿达兴业	2004-06-25	江苏省	扬州市	广陵区			C26	化学原料及化学制品制造业	0.0419424	0.648386	22.6761	9	1.33819	10.6042	21500000	0.0089095	1	1	-3.51432	2349	鸿达兴业	17.56	D	13.37	1	0	0	3.19	0		master only (1)
2002	2014	1000000	3320000000	2528000000	346900000	9749000000	6916000000	2833000000	鸿达兴业	2004-06-25	江苏省	扬州市	广陵区			C26	化学原料及化学制品制造业	0.035587	0.709393	23.0004	10	1.3131	0.373851	17300000	0.0052154	1	1	-3.54169	1262	鸿达兴业	22.7	D	17.97	1.33	0	0	3.4	0		master only (1)
2002	2015	6590923	3810000000	2643000000	539800000	11630000000	7438000000	4194000000	鸿达兴业	2004-06-25	江苏省	扬州市	广陵区			C26	化学原料及化学制品制造业	0.0464087	0.639467	23.177	11	1.44156	0.147582	2722866	0.0007147	1	1	-3.57101	824	鸿达兴业	26.21	D	21.24	1.49	0	0	3.48	0		master only (1)
2002	2016	15900000	6158000000	4264000000	823300000	12740000000	8870000000	3868000000	鸿达兴业	2004-06-25	江苏省	扬州市	广陵区			C26	化学原料及化学制品制造业	0.0646368	0.696378	23.2678	12	1.44411	0.616211	17200000	0.0027955	1	1	-3.60446	1251	鸿达兴业	25.28	D	20.65	1	0	0	3.63	0		master only (1)
2002	2017	108000000	6541000000	4196000000	1013000000	14340000000	8494000000	5844000000	鸿达兴业	2004-06-25	江苏省	扬州市	广陵区			C26	化学原料及化学制品制造业	0.0706642	0.592398	23.3862	13	1.5586	0.0621802	19600000	0.0030005	1	1	-3.63488	1117	鸿达兴业	25.24	D	21.12	0.91	0	0	3.21	0	100000	matched (3)
2004	2010	41600000	541200000	176900000	135200000	1358000000	322600000	1036000000	华邦健康	2004-06-25	重庆市	重庆市	渝北区			C26	化学原料及化学制品制造业	0.0995176	0.237477	21.0295	6	3.0598		8439371	0.0155931	3	0	-3.31892	965	华邦健康	23.08	D	17.45	1.65	0	0	3.98	0	63000	matched (3)
2004	2011	8490486	638100000	211700000	308400000	4189000000	1603000000	2586000000	华邦健康	2004-06-25	重庆市	重庆市	渝北区			C26	化学原料及化学制品制造业	0.0736227	0.382744	22.1558	7	3.01383	0.178989	20700000	0.0324687	3	0	-3.43569	1197	华邦健康	23.47	D	18.53	3	0	0	1.94	0	60000	matched (3)
2004	2012	16900000	3877000000	2893000000	370800000	5922000000	2965000000	2957000000	华邦健康	2004-06-25	重庆市	重庆市	渝北区			C26	化学原料及化学制品制造业	0.0626127	0.500716	22.502	8	1.34034	5.07649	23400000	0.0060392	3	0	-3.47737	836	华邦健康	28.97	D	20.92	2.07	0	0	5.98	0	60000	matched (3)
2004	2013	41400000	4464000000	3297000000	317000000	7648000000	3635000000	4012000000	华邦健康	2004-06-25	重庆市	重庆市	渝北区			C26	化学原料及化学制品制造业	0.0414491	0.475353	22.7577	9	1.35382	0.151194	18100000	0.0040488	3	0	-3.512	1730	华邦健康	20.73	D	12.59	1.43	0	0	6.71	0	872853	matched (3)
2004	2014	57600000	4867000000	3383000000	446000000	13570000000	7902000000	5666000000	华邦健康	2004-06-25	重庆市	重庆市	渝北区			C26	化学原料及化学制品制造业	0.032871	0.582392	23.331	10	1.43838	0.0902983	37900000	0.0077853	3	0	-3.5195	930	华邦健康	24.62	D	19.89	1.07	0	0	3.66	0	888605	matched (3)
2004	2015	693000000	6174000000	4040000000	656800000	19710000000	9300000000	10410000000	华邦健康	2004-06-25	重庆市	重庆市	渝北区			C26	化学原料及化学制品制造业	0.0333237	0.471832	23.7044	11	1.52814	0.268687	32000000	0.0051765	3	0	-3.52313	933	华邦健康	25.45	D	19.64	0.92	0	0	4.89	0	650205	matched (3)
2004	2016	747000000	7093000000	4753000000	611700000	24230000000	13520000000	10700000000	华邦健康	2004-06-25	重庆市	重庆市	渝北区			C26	化学原料及化学制品制造业	0.0252469	0.558185	23.9108	12	1.4924	0.148757	76400000	0.0107755	3	0	-3.53789	1640	华邦健康	23.05	D	17.48	1.09	0	0	4.48	0	78000	matched (3)
2004	2017	774000000	9109000000	6195000000	593700000	29090000000	15790000000	13300000000	华邦健康	2004-06-25	重庆市	重庆市	渝北区			C26	化学原料及化学制品制造业	0.0204079	0.542914	24.0937	13	1.47035	0.28425	57200000	0.0062756	3	0	-3.55246	1371	华邦健康	24.05	D	17.67	1.6	0	0	4.78	0	713538	matched (3)
2012	2010	5500000	820000000	546100000	114200000	1192000000	648900000	542900000	凯恩股份	2004-07-05	浙江省	丽水市	遂昌县	1	2	C22	造纸及纸制品业	0.0958297	0.54447	20.8987	6	1.5017		6659081	0.0081204	1	1	-3.30293	1104	凯恩股份	21.97	D	16.29	4	0	0	1.68	0		master only (1)
2012	2011	5500000	961800000	626300000	132000000	1658000000	526400000	1131000000	凯恩股份	2004-07-05	浙江省	丽水市	遂昌县	1	2	C22	造纸及纸制品业	0.0796247	0.317605	21.2286	7	1.5355	0.172799	7568466	0.0078695	1	1	-3.38043	902	凯恩股份	26.35	D	19.97	4	0	0	2.38	0		master only (1)
2012	2012	5500000	863900000	587200000	98131086	1611000000	416900000	1194000000	凯恩股份	2004-07-05	浙江省	丽水市	遂昌县	1	2	C22	造纸及纸制品业	0.0608982	0.258718	21.2004	8	1.47114	-0.101723	8928718	0.0103351	1	1	-3.41759	1558	凯恩股份	21.85	D	16.13	3.53	0	0	2.19	0		master only (1)
2012	2013	0	979800000	697900000	6.73324e+06	1650000000	455600000	1195000000	凯恩股份	2004-07-05	浙江省	丽水市	遂昌县	1	2	C22	造纸及纸制品业	0.0040796	0.276034	21.2243	9	1.40398	0.134176	7642342	0.0077996	1	1	-3.46	2492	凯恩股份	16.29	D	7.6	3.69	0	0	5	0		master only (1)
2012	2014	0	932800000	671700000	49940207	1586000000	342300000	1244000000	凯恩股份	2004-07-05	浙江省	丽水市	遂昌县	1	2	C22	造纸及纸制品业	0.031492	0.215853	21.1844	10	1.38861	-0.0480485	6957987	0.0074596	1	1	-3.49594	2679	凯恩股份	16.01	D	9.02	4	0	0	2.99	0		master only (1)
2012	2015	0	892500000	648600000	27579363	1624000000	376100000	1248000000	凯恩股份	2004-07-05	浙江省	丽水市	遂昌县	1	2	C22	造纸及纸制品业	0.0169838	0.231634	21.2081	11	1.37596	-0.0431581	7050924	0.0079002	1	1	-3.53837	3101	凯恩股份	12.01	D	7.93	4	0	0	0.08	0		master only (1)
2012	2016	0	942600000	689400000	17997558	1749000000	482800000	1266000000	凯恩股份	2004-07-05	浙江省	丽水市	遂昌县	1	2	C22	造纸及纸制品业	0.0102925	0.276121	21.2821	12	1.36715	0.0561003	9046314	0.0095975	1	1	-3.58563	2880	凯恩股份	16.31	D	8.58	3.73	0	0	4	0		master only (1)
2012	2017	0	1028000000	776800000	41729445	1777000000	479800000	1298000000	凯恩股份	2004-07-05	浙江省	丽水市	遂昌县	1	2	C22	造纸及纸制品业	0.023478	0.269959	21.2984	13	1.32394	0.0910488	9360450	0.009102	1	1	-3.62716	3067	凯恩股份	13.61	D	8.49	3.87	0	0	1.25	0		master only (1)
2014	2010	897436	1276000000	1025000000	122100000	1104000000	333100000	770900000	永新股份	2004-07-08	安徽省	黄山市	徽州区	1	2	C29	橡胶和塑料制品业	0.110583	0.301718	20.8222	6	1.2449		11400000	0.0089276	2	0	-3.29289	926	永新股份	23.34	D	16.63	4	0	0	2.71	1		master only (1)
2014	2011	960684	1513000000	1211000000	147800000	1314000000	447700000	866100000	永新股份	2004-07-08	安徽省	黄山市	徽州区	1	2	C29	橡胶和塑料制品业	0.112498	0.340746	20.9961	7	1.24982	0.18544	12600000	0.0083264	2	0	-3.35498	749	永新股份	28.72	D	22	4	0	0	2.72	1		master only (1)
2014	2012	1683761	1521000000	1184000000	180300000	1832000000	417200000	1414000000	永新股份	2004-07-08	安徽省	黄山市	徽州区	1	2	C29	橡胶和塑料制品业	0.0984179	0.227799	21.3285	8	1.2847	0.005239	14200000	0.0093438	2	0	-3.42993	747	永新股份	30.61	D	23.94	4	0	0	2.67	1		master only (1)
2014	2013	1683761	1618000000	1285000000	175700000	1895000000	388600000	1506000000	永新股份	2004-07-08	安徽省	黄山市	徽州区	1	2	C29	橡胶和塑料制品业	0.0927202	0.205101	21.3624	9	1.25972	0.0640657	12400000	0.0076363	2	0	-3.47297	756	永新股份	30.09	D	23.47	4	0	0	2.62	1		master only (1)
2014	2014	2420725	1668000000	1354000000	153500000	1966000000	405500000	1561000000	永新股份	2004-07-08	安徽省	黄山市	徽州区	1	2	C29	橡胶和塑料制品业	0.0780669	0.206241	21.3993	10	1.23207	0.03089	13000000	0.0077621	2	0	-3.51616	513	永新股份	27.86	D	21.75	3.56	0	0	2.55	1		master only (1)
2014	2015	2420725	1784000000	1405000000	182300000	2078000000	445600000	1633000000	永新股份	2004-07-08	安徽省	黄山市	徽州区	1	2	C29	橡胶和塑料制品业	0.0877075	0.214431	21.4548	11	1.26964	0.0691752	12200000	0.0068516	2	0	-3.56073	526	永新股份	29.59	D	23.06	3.89	0	0	2.64	1		master only (1)
2014	2016	2473678	1904000000	1460000000	207500000	2277000000	521200000	1756000000	永新股份	2004-07-08	安徽省	黄山市	徽州区	1	2	C29	橡胶和塑料制品业	0.0911428	0.228892	21.5461	12	1.30414	0.0674523	16600000	0.0087106	2	0	-3.60768	49	永新股份	73.81	B	26.22	13	15	17	2.59	1		master only (1)
2014	2017	2473678	2008000000	1552000000	211300000	2401000000	604900000	1796000000	永新股份	2004-07-08	安徽省	黄山市	徽州区	1	2	C29	橡胶和塑料制品业	0.0879882	0.25191	21.5993	13	1.29374	0.0546419	10800000	0.0053981	2	0	-3.65139	513	永新股份	28.75	D	22.48	3.64	0	0	2.63	1		master only (1)
2015	2010	0	1548000000	1417000000	27565606	1808000000	1250000000	558800000	霞客环保	2004-07-08	江苏省	无锡市	江阴市			C17	纺织业	0.0152433	0.690989	21.3157	6	1.0925		3258970	0.0021054	1	1	-3.34877	1749	霞客环保	18.16	D	10.09	0.2	0	0	7.87	0		master only (1)
2015	2011	170940	1856000000	1701000000	31038563	2337000000	1543000000	794100000	霞客环保	2004-07-08	江苏省	无锡市	江阴市			C17	纺织业	0.0132808	0.660236	21.5722	7	1.09127	0.199344	4622751	0.0024901	1	1	-3.40953	2053	霞客环保	17.17	D	7.9	0.25	0	0	9.02	0		master only (1)
2015	2012	170940	1723000000	1599000000	12576000	2812000000	2012000000	800600000	霞客环保	2004-07-08	江苏省	无锡市	江阴市			C17	纺织业	0.0044719	0.715299	21.7572	8	1.07751	-0.0720438	3866800	0.0022446	1	1	-3.461	2370	霞客环保	15.27	D	7.29	0.45	0	0	7.53	0		master only (1)
2015	2013	170940	2079000000	2283000000	-399900000	2630000000	2230000000	400700000	霞客环保	2004-07-08	江苏省	无锡市	江阴市			C17	纺织业	-0.152035	0.847659	21.6904	9	0.910608	0.206567	5437524	0.002616	1	1	-3.4972	3106	霞客环保	-2.19	E	-2.8	0.43	0	0	0.18	0		master only (1)
2015	2014	0	1156000000	1510000000	-1204000000	471300000	1128000000	-657000000	霞客环保	2004-07-08	江苏省	无锡市	江阴市			C17	纺织业	-2.55506	2.394	19.9711	10	0.765046	-0.444052	4521728	0.003913	1	1	-3.30734	3505	霞客环保	-10.17	E	-10.43	0.5	0	0	-0.24	0		master only (1)
2015	2015	0	393200000	361500000	108700000	357200000	27735310	329400000	霞客环保	2004-07-08	江苏省	无锡市	江阴市			C17	纺织业	0.304454	0.0776526	19.6937	11	1.08773	-0.65975	10000	2.54e-05	1	1	-3.28645	3045	霞客环保	12.85	D	12.04	0.81	0	0	0	0		master only (1)
2015	2016	0	379700000	374500000	-41241929	309800000	20235536	289500000	霞客环保	2004-07-08	江苏省	无锡市	江阴市			C17	纺织业	-0.133138	0.0653249	19.5513	12	1.01405	-0.0341832	13417.6	3.53e-05	1	1	-3.29262	3459	霞客环保	1.57	D	0.25	1.32	0	0	0	0		master only (1)
2015	2017	0	409900000	375800000	8.65131e+06	336000000	22606640	313400000	霞客环保	2004-07-08	江苏省	无锡市	江阴市			C17	纺织业	0.0257487	0.0672837	19.6326	13	1.09067	0.0794162	75400	0.0001839	1	1	-3.35214	3158	霞客环保	12.3	D	7.44	1.03	0	0	3.83	0		master only (1)
2037	2010	6808484	1560000000	1080000000	158700000	1851000000	1060000000	790800000	久联发展	2004-09-08	贵州省	贵阳市	乌当区	1	1	C26	化学原料及化学制品制造业	0.0857283	0.572696	21.3388	6	1.44443		2619332	0.0016788	3	0	-3.35087	1281	久联发展	20.85	D	15.9	0.62	0	0	4.33	1		master only (1)
2037	2011	7907730	2423000000	1740000000	249200000	2814000000	1833000000	981000000	久联发展	2004-09-08	贵州省	贵阳市	乌当区	1	1	C26	化学原料及化学制品制造业	0.0885408	0.651388	21.7579	7	1.39244	0.553205	5750589	0.002373	3	0	-3.42103	1184	久联发展	23.58	D	18.99	0.24	0	0	4.35	1		master only (1)
2037	2012	9913041	3099000000	2336000000	254300000	4627000000	2815000000	1812000000	久联发展	2004-09-08	贵州省	贵阳市	乌当区	1	1	C26	化学原料及化学制品制造业	0.0549481	0.60831	22.2552	8	1.3264	0.278674	6977227	0.0022517	3	0	-3.47723	1508	久联发展	22.2	D	17.85	0.35	0	0	4	1		master only (1)
2037	2013	11100000	3407000000	2441000000	256700000	6090000000	4045000000	2045000000	久联发展	2004-09-08	贵州省	贵阳市	乌当区	1	1	C26	化学原料及化学制品制造业	0.0421548	0.664193	22.5299	9	1.39534	0.0993573	3184194	0.0009347	3	0	-3.51706	1283	久联发展	23.84	D	19.48	0.34	0	0	4.02	1		master only (1)
2037	2014	14900000	3907000000	2789000000	267400000	7778000000	5511000000	2267000000	久联发展	2004-09-08	贵州省	贵阳市	乌当区	1	1	C26	化学原料及化学制品制造业	0.0343817	0.708508	22.7746	10	1.40086	0.146896	19000000	0.0048749	3	0	-3.55144	1373	久联发展	22.1	D	17.77	0.27	0	0	4.06	1		master only (1)
2037	2015	23400000	3165000000	2260000000	89547637	8313000000	5996000000	2317000000	久联发展	2004-09-08	贵州省	贵阳市	乌当区	1	1	C26	化学原料及化学制品制造业	0.0107717	0.721263	22.8411	11	1.4001	-0.190019	18200000	0.0057424	3	0	-3.58902	2617	久联发展	17	D	11.72	0.28	0	0	5	1		master only (1)
2037	2016	25300000	3385000000	2487000000	79233156	7309000000	4948000000	2361000000	久联发展	2004-09-08	贵州省	贵阳市	乌当区	1	1	C26	化学原料及化学制品制造业	0.01084	0.676997	22.7124	12	1.36116	0.0696901	15100000	0.0044651	3	0	-3.63336	2914	久联发展	15.99	D	10.55	0.44	0	0	5	1		master only (1)
2037	2017	26500000	4587000000	3663000000	99126664	7832000000	5421000000	2411000000	久联发展	2004-09-08	贵州省	贵阳市	乌当区	1	1	C26	化学原料及化学制品制造业	0.0126564	0.692195	22.7815	13	1.25219	0.355128	16300000	0.0035496	3	0	-3.67121	2818	久联发展	16.09	D	10.81	0.28	0	0	5	1	1000000	matched (3)
2039	2010	1407165	1446000000	698600000	139500000	15940000000	12900000000	3040000000	黔源电力	2005-03-03	贵州省	贵阳市	南明区	1	1	D44	电力、热力生产和供应业	0.0087489	0.809348	23.4923	5	2.0693		0	0	3	0	-3.30526	315	黔源电力	54.18	C	11.76	6.16	17	11	8.26	1		master only (1)
2039	2011	1728558	976900000	478100000	-120500000	15510000000	12270000000	3237000000	黔源电力	2005-03-03	贵州省	贵阳市	南明区	1	1	D44	电力、热力生产和供应业	-0.0077718	0.791241	23.4646	6	2.04341	-0.324271	0	0	3	0	-3.34786	552	黔源电力	42.89	C	4.1	6.05	13	14	5.74	1		master only (1)
2039	2012	3556801	1771000000	792200000	246400000	15940000000	12380000000	3556000000	黔源电力	2005-03-03	贵州省	贵阳市	南明区	1	1	D44	电力、热力生产和供应业	0.0154603	0.776899	23.4921	7	2.23624	0.813431	0	0	3	0	-3.38528	569	黔源电力	52.64	C	16.75	7.56	17	9	2.33	1		master only (1)
2039	2013	5773446	1017000000	530800000	-158900000	17170000000	13790000000	3379000000	黔源电力	2005-03-03	贵州省	贵阳市	南明区	1	1	D44	电力、热力生产和供应业	-0.0092546	0.803193	23.5664	8	1.91672	-0.425673	0	0	3	0	-3.41797	632	黔源电力	38.44	D	3.82	7.45	18	9	0.17	1		master only (1)
2039	2014	8348125	2147000000	966500000	511100000	18610000000	14710000000	3896000000	黔源电力	2005-03-03	贵州省	贵阳市	南明区	1	1	D44	电力、热力生产和供应业	0.0274649	0.790654	23.6469	9	2.22161	1.11036	72800000	0.0338878	3	0	-3.44951	67	黔源电力	62.69	B	22.07	7.41	18	13.5	1.71	1		master only (1)
2039	2015	35100000	2700000000	1171000000	633500000	18230000000	13930000000	4296000000	黔源电力	2005-03-03	贵州省	贵阳市	南明区	1	1	D44	电力、热力生产和供应业	0.0347493	0.764339	23.6263	10	2.30616	0.257471	72100000	0.0266933	3	0	-3.49173	159	黔源电力	62.99	B	22.7	6.5	18	11	4.79	1		master only (1)
2039	2016	40500000	1918000000	971100000	239600000	17490000000	13320000000	4171000000	黔源电力	2005-03-03	贵州省	贵阳市	南明区	1	1	D44	电力、热力生产和供应业	0.0137044	0.761462	23.5847	11	1.97514	-0.289574	20200000	0.0105229	3	0	-3.5361	269	黔源电力	62.54	B	19.28	6.37	20	13	3.89	1		master only (1)
2039	2017	44600000	2419000000	1164000000	543400000	17130000000	12700000000	4437000000	黔源电力	2005-03-03	贵州省	贵阳市	南明区	1	1	D44	电力、热力生产和供应业	0.0317172	0.741051	23.5643	12	2.07924	0.261355	14800000	0.0061211	3	0	-3.57818	1167	黔源电力	25.01	D	20.27	0.24	0	0	4.5	1		master only (1)
2042	2010	10400000	4783000000	3840000000	375900000	5973000000	3338000000	2635000000	华孚时尚	2005-04-27	安徽省	淮北市	烈山区			C17	纺织业	0.0629373	0.558787	22.5105	5	1.24565		31800000	0.0066497	2	0	-3.35729	251	华孚时尚	56.42	C	16.36	5.51	19	9	6.55	0		master only (1)
2042	2011	11900000	5107000000	4093000000	395500000	7489000000	4412000000	3077000000	华孚时尚	2005-04-27	安徽省	淮北市	烈山区			C17	纺织业	0.0528181	0.589165	22.7366	6	1.2477	0.0677656	53000000	0.0103822	2	0	-3.39265	67	华孚时尚	72.53	B	18.7	7.5	19	13	14.33	0		master only (1)
2042	2012	12600000	5732000000	5115000000	91647351	8009000000	4892000000	3116000000	华孚时尚	2005-04-27	安徽省	淮北市	烈山区			C17	纺织业	0.0114433	0.610884	22.8038	7	1.12068	0.122413	273000000	0.0475594	2	0	-3.43043	223	华孚时尚	66.8	B	13.35	6.45	17	20	10	0	30000	matched (3)
2042	2013	16800000	6240000000	5360000000	188600000	7919000000	4599000000	3319000000	华孚时尚	2005-04-27	安徽省	淮北市	烈山区			C17	纺织业	0.0238123	0.580808	22.7925	8	1.16422	0.088566	139000000	0.0222586	2	0	-3.47083	202	华孚时尚	70.62	B	12.15	6.48	19	19	13.99	0	0	matched (3)
2042	2014	17700000	6133000000	5313000000	167100000	8861000000	5391000000	3470000000	华孚时尚	2005-04-27	安徽省	淮北市	烈山区			C17	纺织业	0.0188604	0.608437	22.9049	9	1.15423	-0.017208	217000000	0.0353297	2	0	-3.50635	2189	华孚时尚	18.41	D	10.24	0.39	0	0	7.78	0		master only (1)
2042	2015	22300000	6804000000	5871000000	339400000	9398000000	5652000000	3746000000	华孚时尚	2005-04-27	安徽省	淮北市	烈山区			C17	纺织业	0.0361127	0.601403	22.9637	10	1.15878	0.109398	292000000	0.0429728	2	0	-3.54357	2426	华孚时尚	17.91	D	14	0.42	0	0	3.49	0		master only (1)
2042	2016	25500000	8837000000	7803000000	512500000	11000000000	6764000000	4235000000	华孚时尚	2005-04-27	安徽省	淮北市	烈山区			C17	纺织业	0.0465989	0.614957	23.1211	11	1.13248	0.298847	423000000	0.0478194	2	0	-3.57468	440	华孚时尚	53.85	C	7.48	7.44	20	15	3.93	0	512000	matched (3)
2042	2017	25500000	12600000000	11190000000	702600000	16030000000	8791000000	7240000000	华孚时尚	2005-04-27	安徽省	淮北市	烈山区			C17	纺织业	0.0438282	0.548382	23.4978	12	1.126	0.425447	953000000	0.0756208	2	0	-3.58474	1157	华孚时尚	25.04	D	20.79	0.34	0	0	3.91	0		master only (1)
2054	2010	14200000	1100000000	741100000	378100000	1848000000	522800000	1325000000	德美化工	2006-07-25	广东省	佛山市	顺德区			C26	化学原料及化学制品制造业	0.204622	0.282879	21.3374	4	1.48419		9394507	0.0085413	1	1	-3.27074	914	德美化工	23.43	D	18.22	4	0	0	1.21	0		master only (1)
2054	2011	17500000	1039000000	700500000	174200000	2009000000	535800000	1473000000	德美化工	2006-07-25	广东省	佛山市	顺德区			C26	化学原料及化学制品制造业	0.0867055	0.266738	21.4207	5	1.48357	-0.0551669	4217062	0.0040579	1	1	-3.31795	193	德美化工	65.61	B	20.68	12.5	12	17	3.43	0	248839	matched (3)
2054	2012	14700000	1106000000	699900000	145500000	2114000000	444600000	1669000000	德美化工	2006-07-25	广东省	佛山市	顺德区			C26	化学原料及化学制品制造业	0.0688366	0.210309	21.4718	6	1.58052	0.0644746	2991129	0.0027039	1	1	-3.36208	49	德美化工	76.63	B	19.59	12.5	15	25	4.54	0		master only (1)
2054	2013	15400000	1184000000	726600000	152800000	2256000000	536100000	1720000000	德美化工	2006-07-25	广东省	佛山市	顺德区			C26	化学原料及化学制品制造业	0.0677501	0.237647	21.5369	7	1.6299	0.0705489	4389499	0.0037065	1	1	-3.40701	943	德美化工	26.86	D	19.4	4	0	0	3.46	0		master only (1)
2054	2014	16900000	1229000000	790600000	114000000	2596000000	799300000	1797000000	德美化工	2006-07-25	广东省	佛山市	顺德区			C26	化学原料及化学制品制造业	0.0439199	0.307856	21.6773	8	1.55394	0.0373643	6031637	0.0049097	1	1	-3.45641	1008	德美化工	24.2	D	16.91	4	0	0	3.29	0		master only (1)
2054	2015	17400000	2371000000	1794000000	327300000	2489000000	520800000	1968000000	德美化工	2006-07-25	广东省	佛山市	顺德区			C26	化学原料及化学制品制造业	0.131506	0.20925	21.6352	9	1.3211	0.92962	12300000	0.0051935	1	1	-3.49376	50	德美化工	72.52	B	23.46	13	12	20	4.06	0		master only (1)
2054	2016	38800000	2412000000	1833000000	175300000	2943000000	901200000	2042000000	德美化工	2006-07-25	广东省	佛山市	顺德区			C26	化学原料及化学制品制造业	0.0595558	0.306174	21.8028	10	1.31564	0.0174468	34600000	0.0143506	1	1	-3.54337	32	德美化工	75.57	B	18.78	14.96	15	23	3.83	0		master only (1)
2054	2017	39100000	2456000000	1915000000	36292097	3011000000	1011000000	1999000000	德美化工	2006-07-25	广东省	佛山市	顺德区			C26	化学原料及化学制品制造业	0.0120538	0.335918	21.8255	11	1.28255	0.0180755	16600000	0.0067488	1	1	-3.58448	1998	德美化工	21	D	12.33	3.67	0	0	5	0		master only (1)
2057	2010	2674607	561300000	498300000	10568900	436500000	190800000	245700000	中钢天源	2006-08-02	安徽省	马鞍山市	雨山区			C26	化学原料及化学制品制造业	0.0242148	0.437168	19.8942	4	1.12649		693822	0.001236	2	0	-3.05113	2093	中钢天源	14.13	D	10.18	1.35	0	0	2.6	1		master only (1)
2057	2011	2044904	614200000	545500000	10608068	492300000	236100000	256300000	中钢天源	2006-08-02	安徽省	马鞍山市	雨山区			C26	化学原料及化学制品制造业	0.021546	0.479502	20.0147	5	1.12596	0.0941844	4688897	0.007634	2	0	-3.11631	2378	中钢天源	12.19	D	8.24	0.73	0	0	3.22	1		master only (1)
2057	2012	2044904	368000000	334500000	-34707962	638300000	180200000	458100000	中钢天源	2006-08-02	安徽省	马鞍山市	雨山区			C26	化学原料及化学制品制造业	-0.0543741	0.282338	20.2743	6	1.10015	-0.400901	5828709	0.01584	2	0	-3.20635	2714	中钢天源	3.71	D	1.9	1.4	0	0	0.41	1	30000	matched (3)
2057	2013	2044904	317600000	259300000	21279275	586600000	106900000	479700000	中钢天源	2006-08-02	安徽省	马鞍山市	雨山区			C26	化学原料及化学制品制造业	0.0362758	0.182301	20.1898	7	1.22479	-0.136808	24000000	0.075421	2	0	-3.2307	2363	中钢天源	17.43	D	11.57	3.58	0	0	2.28	1	0	matched (3)
2057	2014	2044904	350200000	287200000	19432716	608400000	111600000	496800000	中钢天源	2006-08-02	安徽省	马鞍山市	雨山区			C26	化学原料及化学制品制造业	0.0319413	0.183473	20.2263	8	1.21967	0.102678	16200000	0.0463677	2	0	-3.27753	2842	中钢天源	14.7	D	10.68	2.58	0	0	1.44	1		master only (1)
2057	2015	2044904	307300000	250600000	16285312	602700000	91221938	511400000	中钢天源	2006-08-02	安徽省	马鞍山市	雨山区			C26	化学原料及化学制品制造业	0.0270221	0.151364	20.2169	9	1.22584	-0.122747	21500000	0.0700431	2	0	-3.31577	2860	中钢天源	15	D	9.77	2.44	0	0	2.79	1	100000	matched (3)
2057	2016	2044904	344900000	273100000	34278230	687200000	143400000	543800000	中钢天源	2006-08-02	安徽省	马鞍山市	雨山区			C26	化学原料及化学制品制造业	0.0498813	0.208604	20.3481	10	1.26316	0.122668	4529311	0.0131306	2	0	-3.37951	2819	中钢天源	16.75	D	11.53	2.92	0	0	2.3	1	0	matched (3)
2057	2017	4560376	1157000000	849600000	135700000	1644000000	395000000	1249000000	中钢天源	2006-08-02	安徽省	马鞍山市	雨山区			C26	化学原料及化学制品制造业	0.0825845	0.240273	21.2203	11	1.36163	2.35387	14000000	0.0120837	2	0	-3.5396	922	中钢天源	26.28	D	20.13	4	0	0	2.15	1		master only (1)
2064	2010	2322391	1628000000	1103000000	319800000	1945000000	283000000	1662000000	华峰氨纶	2006-08-23	浙江省	温州市	瑞安市			C28	化学纤维制造业	0.164459	0.145515	21.3883	4	1.47649		11800000	0.0072626	1	1	-3.27522	463	华峰氨纶	46.74	C	10.19	13	7	14	2.55	0	400000	matched (3)
2064	2011	2467785	1414000000	1201000000	50786171	2143000000	504100000	1639000000	华峰氨纶	2006-08-23	浙江省	温州市	瑞安市			C28	化学纤维制造业	0.0237017	0.235281	21.4853	5	1.17752	-0.131293	3135900	0.0022176	1	1	-3.32313	537	华峰氨纶	45.55	C	9.28	11.96	13	8	3.31	0	0	matched (3)
2064	2012	4016938	1727000000	1555000000	18402909	2426000000	768600000	1657000000	华峰氨纶	2006-08-23	浙江省	温州市	瑞安市			C28	化学纤维制造业	0.007587	0.31687	21.6093	6	1.11102	0.221471	46300000	0.0267809	1	1	-3.37207	203	华峰氨纶	67.71	B	12.71	12	12	23	8	0	0	matched (3)
2064	2013	4277794	2372000000	1828000000	276800000	2777000000	917500000	1860000000	华峰氨纶	2006-08-23	浙江省	温州市	瑞安市			C28	化学纤维制造业	0.0996495	0.330334	21.7448	7	1.29784	0.373486	7745947	0.003265	1	1	-3.42032	318	华峰氨纶	66.55	B	20.54	15	12	17	2.01	0	98400	matched (3)
2064	2014	5245615	2362000000	1614000000	410700000	4433000000	1291000000	3142000000	华峰氨纶	2006-08-23	浙江省	温州市	瑞安市			C28	化学纤维制造业	0.092646	0.291169	22.2123	8	1.46294	-0.0045964	6340706	0.002685	1	1	-3.47667	1006	华峰氨纶	24.23	D	17.84	4	0	0	2.39	0	217596	matched (3)
2064	2015	5580849	2547000000	1875000000	254100000	5385000000	2031000000	3354000000	华峰氨纶	2006-08-23	浙江省	温州市	瑞安市			C28	化学纤维制造业	0.0471914	0.377156	22.4069	9	1.35875	0.0786879	11000000	0.0043179	1	1	-3.51794	1714	华峰氨纶	21.1	D	14.28	3.2	0	0	3.62	0	183288	matched (3)
2064	2016	5733195	2844000000	2346000000	-303800000	5387000000	2372000000	3016000000	华峰氨纶	2006-08-23	浙江省	温州市	瑞安市			C28	化学纤维制造业	-0.0563954	0.440223	22.4073	10	1.21257	0.116539	15500000	0.005445	1	1	-3.55794	456	华峰氨纶	53.06	C	2.68	13.85	15	23	-1.47	0	264288	matched (3)
2064	2017	6252545	4150000000	3292000000	385500000	5562000000	2162000000	3400000000	华峰氨纶	2006-08-23	浙江省	温州市	瑞安市			C28	化学纤维制造业	0.0693077	0.388707	22.4392	11	1.2605	0.458984	22500000	0.0054214	1	1	-3.59783	2253	华峰氨纶	19.77	D	14.03	3.25	0	0	2.49	0	251000	matched (3)
2066	2010	303878	844900000	615700000	64029464	1641000000	891000000	750300000	瑞泰科技	2006-08-23	北京市	北京市	朝阳区			C30	非金属矿物制品业	0.0390114	0.54288	21.2188	4	1.37216		8783147	0.010396	1	1	-3.25945	1947	瑞泰科技	16.14	D	12.85	0.15	0	0	3.14	1		master only (1)
2066	2011	362084	1397000000	1029000000	83414791	2204000000	1321000000	882600000	瑞泰科技	2006-08-23	北京市	北京市	朝阳区			C30	非金属矿物制品业	0.0378524	0.59949	21.5134	5	1.35684	0.653193	12400000	0.0088788	1	1	-3.32527	1806	瑞泰科技	19	D	15.9	0.22	0	0	2.88	1		master only (1)
2066	2012	385118	1486000000	1137000000	17040463	2946000000	1896000000	1050000000	瑞泰科技	2006-08-23	北京市	北京市	朝阳区			C30	非金属矿物制品业	0.0057836	0.643628	21.8038	6	1.30736	0.0641065	25000000	0.0168311	1	1	-3.38342	2204	瑞泰科技	17.21	D	11.94	0.27	0	0	5	1		master only (1)
2066	2013	5307151	1864000000	1481000000	-103400000	3090000000	2160000000	929500000	瑞泰科技	2006-08-23	北京市	北京市	朝阳区			C30	非金属矿物制品业	-0.0334668	0.699161	21.8513	7	1.2588	0.25443	16700000	0.0089374	1	1	-3.4257	3108	瑞泰科技	-2.43	E	0.55	0.17	0	0	-3.15	1		master only (1)
2066	2014	5307151	2090000000	1586000000	48052951	3258000000	2311000000	946500000	瑞泰科技	2006-08-23	北京市	北京市	朝阳区			C30	非金属矿物制品业	0.01475	0.709461	21.9043	8	1.31787	0.120744	23200000	0.0110913	1	1	-3.46801	3079	瑞泰科技	12.05	D	7.08	0.14	0	0	4.83	1		master only (1)
2066	2015	7511227	1845000000	1409000000	-55834168	3511000000	2650000000	861100000	瑞泰科技	2006-08-23	北京市	北京市	朝阳区			C30	非金属矿物制品业	-0.0159042	0.754719	21.9791	9	1.30984	-0.116795	25600000	0.0138834	1	1	-3.51086	3519	瑞泰科技	-1.74	E	2.11	0.09	0	0	-3.94	1		master only (1)
2066	2016	7541187	1755000000	1333000000	18765421	3388000000	2523000000	864900000	瑞泰科技	2006-08-23	北京市	北京市	朝阳区			C30	非金属矿物制品业	0.0055381	0.744741	21.9436	10	1.31646	-0.0488166	23300000	0.0132649	1	1	-3.54957	3181	瑞泰科技	12.59	D	7.49	0.1	0	0	5	1	110000	matched (3)
2066	2017	7557119	2177000000	1680000000	43095210	3665000000	2741000000	923700000	瑞泰科技	2006-08-23	北京市	北京市	朝阳区			C30	非金属矿物制品业	0.01176	0.747951	22.022	11	1.29581	0.239964	26400000	0.0121258	1	1	-3.59228	3179	瑞泰科技	11.9	D	7.5	0.1	0	0	4.3	1	0	matched (3)
2067	2010	22600000	2629000000	2234000000	136400000	4398000000	2476000000	1922000000	景兴纸业	2006-09-15	浙江省	嘉兴市	平湖市			C22	造纸及纸制品业	0.0310075	0.562926	22.2044	4	1.17693		13100000	0.0049983	1	1	-3.31655	2052	景兴纸业	14.73	D	11.13	2.03	0	0	1.57	0	870000	matched (3)
2067	2011	22800000	3451000000	2969000000	139000000	5462000000	2501000000	2961000000	景兴纸业	2006-09-15	浙江省	嘉兴市	平湖市			C22	造纸及纸制品业	0.0254437	0.457888	22.4211	5	1.16254	0.312728	11600000	0.0033668	1	1	-3.3579	2392	景兴纸业	11.76	D	9.94	1.34	0	0	0.48	0	84900	matched (3)
2067	2012	36700000	3104000000	2699000000	11797740	5209000000	2236000000	2973000000	景兴纸业	2006-09-15	浙江省	嘉兴市	平湖市			C22	造纸及纸制品业	0.0022649	0.429252	22.3736	6	1.15005	-0.100641	7688363	0.0024769	1	1	-3.39795	2605	景兴纸业	9.64	D	6.99	1.22	0	0	1.43	0		master only (1)
2067	2013	52500000	3022000000	2665000000	5.49341e+06	5189000000	2210000000	2978000000	景兴纸业	2006-09-15	浙江省	嘉兴市	平湖市			C22	造纸及纸制品业	0.0010587	0.42598	22.3697	7	1.13384	-0.0265868	10600000	0.0035022	1	1	-3.43795	2907	景兴纸业	8.79	D	6.79	1.1	0	0	0.9	0		master only (1)
2067	2014	54000000	2888000000	2528000000	3.17957e+06	5810000000	2802000000	3008000000	景兴纸业	2006-09-15	浙江省	嘉兴市	平湖市			C22	造纸及纸制品业	0.0005472	0.482303	22.4829	8	1.14245	-0.0441172	7837199	0.0027135	1	1	-3.47755	3005	景兴纸业	12.89	D	6.73	1.16	0	0	5	0		master only (1)
2067	2015	54000000	2954000000	2570000000	2.08036e+06	5718000000	2708000000	3010000000	景兴纸业	2006-09-15	浙江省	嘉兴市	平湖市			C22	造纸及纸制品业	0.0003638	0.473602	22.4669	9	1.14966	0.0228138	34800000	0.0117866	1	1	-3.51767	3258	景兴纸业	6.5	D	6.49	1.25	0	0	-1.24	0		master only (1)
2067	2016	36100000	3681000000	3171000000	315200000	5690000000	2334000000	3356000000	景兴纸业	2006-09-15	浙江省	嘉兴市	平湖市			C22	造纸及纸制品业	0.0553982	0.410205	22.4621	10	1.16083	0.246052	125000000	0.0338873	1	1	-3.55771	2308	景兴纸业	19.55	D	16.8	1.33	0	0	1.42	0		master only (1)
2067	2017	35600000	5360000000	4291000000	692400000	6299000000	2320000000	3979000000	景兴纸业	2006-09-15	浙江省	嘉兴市	平湖市			C22	造纸及纸制品业	0.109924	0.368297	22.5636	11	1.24918	0.456034	233000000	0.0434213	1	1	-3.59659	1709	景兴纸业	22.42	D	18.34	1.56	0	0	2.52	0		master only (1)
2068	2010	0	3023000000	2597000000	53479177	2982000000	2288000000	694400000	黑猫股份	2006-09-15	江西省	景德镇市	景德镇市	1	1	C26	化学原料及化学制品制造业	0.0179319	0.767178	21.816	4	1.16399		8470256	0.0028021	2	0	-3.30402	2133	黑猫股份	13.31	D	10.73	0.36	0	0	2.22	1	1595000	matched (3)
2068	2011	0	3945000000	3281000000	129500000	4222000000	2884000000	1338000000	黑猫股份	2006-09-15	江西省	景德镇市	景德镇市	1	1	C26	化学原料及化学制品制造业	0.0306777	0.68313	22.1636	5	1.20247	0.305208	9039423	0.0022911	2	0	-3.35585	2274	黑猫股份	14.35	D	9.82	0.26	0	0	4.27	1	0	matched (3)
2068	2012	0	4655000000	3909000000	97707559	5139000000	3712000000	1427000000	黑猫股份	2006-09-15	江西省	景德镇市	景德镇市	1	1	C26	化学原料及化学制品制造业	0.019013	0.722406	22.3601	6	1.19078	0.179818	40600000	0.0087177	2	0	-3.39793	2010	黑猫股份	18.54	D	14.24	0.31	0	0	3.99	1	800000	matched (3)
2068	2013	3054182	5987000000	5202000000	16548790	6929000000	5532000000	1397000000	黑猫股份	2006-09-15	江西省	景德镇市	景德镇市	1	1	C26	化学原料及化学制品制造业	0.0023885	0.798419	22.6589	7	1.15089	0.286124	19800000	0.0033107	2	0	-3.43474	2788	黑猫股份	12.69	D	7.38	0.31	0	0	5	1	0	matched (3)
2068	2014	3054182	6168000000	5222000000	102000000	6786000000	5288000000	1499000000	黑猫股份	2006-09-15	江西省	景德镇市	景德镇市	1	1	C26	化学原料及化学制品制造业	0.0150275	0.779175	22.6382	8	1.1812	0.0302473	16900000	0.0027461	2	0	-3.47521	2938	黑猫股份	13.69	D	9.81	0.32	0	0	3.56	1		master only (1)
2068	2015	3054182	4775000000	4023000000	20143557	6355000000	4258000000	2096000000	黑猫股份	2006-09-15	江西省	景德镇市	景德镇市	1	1	C26	化学原料及化学制品制造业	0.0031699	0.670094	22.5725	9	1.1869	-0.225881	28600000	0.0060002	2	0	-3.51645	2996	黑猫股份	13.53	D	8.08	0.45	0	0	5	1		master only (1)
2068	2016	3358135	4381000000	3585000000	102300000	6179000000	3987000000	2192000000	黑猫股份	2006-09-15	江西省	景德镇市	景德镇市	1	1	C26	化学原料及化学制品制造业	0.0165528	0.645206	22.5445	10	1.22212	-0.0824339	39300000	0.0089756	2	0	-3.55687	2994	黑猫股份	15.15	D	11.22	0.34	0	0	3.59	1		master only (1)
2068	2017	3568635	6947000000	5664000000	493800000	7465000000	4122000000	3344000000	黑猫股份	2006-09-15	江西省	景德镇市	景德镇市	1	1	C26	化学原料及化学制品制造业	0.0661383	0.552103	22.7336	11	1.22666	0.585753	37400000	0.005383	2	0	-3.59274	1306	黑猫股份	24.33	D	21.73	0.27	0	0	2.33	1	400000	matched (3)
2070	2010	706670	1074000000	808500000	84463877	2028000000	956000000	1072000000	*ST众和	2006-10-12	福建省	莆田市	秀屿区	1	1	C17	纺织业	0.0416512	0.471405	21.4303	4	1.32833		11200000	0.0104536	1	1	-3.27874	63	*ST众和	65.26	B	13.29	9.02	17	11	14.95	0		master only (1)
2070	2011	706670	1254000000	985500000	68691223	2003000000	862300000	1140000000	*ST众和	2006-10-12	福建省	莆田市	秀屿区	1	1	C17	纺织业	0.0343007	0.430569	21.4177	5	1.2721	0.167328	3697943	0.0029497	1	1	-3.3177	161	*ST众和	67.18	B	11.43	7.71	20	14	14.04	0		master only (1)
2070	2012	8400254	1220000000	961100000	41201669	3339000000	1711000000	1628000000	*ST众和	2006-10-12	福建省	莆田市	秀屿区	1	1	C17	纺织业	0.012338	0.512392	21.9291	6	1.26933	-0.0268895	3833297	0.0031422	1	1	-3.38901	398	*ST众和	60.46	B	11.67	8.5	18	15	7.29	0		master only (1)
2070	2013	8346893	1483000000	1195000000	38503586	2965000000	1296000000	1669000000	*ST众和	2006-10-12	福建省	莆田市	秀屿区	1	1	C17	纺织业	0.0129861	0.437117	21.8101	7	1.241	0.215475	10800000	0.0073107	1	1	-3.42374	428	*ST众和	61.79	B	9.07	8.5	18	11	15.22	0		master only (1)
2070	2014	9146893	1260000000	1030000000	7.63027e+06	2937000000	2025000000	911500000	*ST众和	2006-10-12	福建省	莆田市	秀屿区	1	1	C17	纺织业	0.0025984	0.689594	21.8005	8	1.2229	-0.150149	30000000	0.0237786	1	1	-3.46326	1850	*ST众和	19.75	D	6.75	3	0	0	10	0		master only (1)
2070	2015	9146893	689000000	599900000	-151400000	2706000000	1945000000	761400000	*ST众和	2006-10-12	福建省	莆田市	秀屿区	1	1	C17	纺织业	-0.0559517	0.718668	21.7189	9	1.14861	-0.453241	23300000	0.0337447	1	1	-3.49886	3253	*ST众和	6.8	D	-0.58	1.78	0	0	5.6	0		master only (1)
2070	2016	9146893	886100000	596100000	-48557434	2719000000	2004000000	714600000	*ST众和	2006-10-12	福建省	莆田市	秀屿区	1	1	C17	纺织业	-0.0178608	0.737138	21.7234	10	1.48662	0.286039	9207302	0.0103908	1	1	-3.53912	3558	*ST众和	-3.83	E	3.98	2.19	0	0	-10	0		master only (1)
2070	2017	8833429	754000000	701500000	-1040000000	1955000000	2429000000	-473900000	*ST众和	2006-10-12	福建省	莆田市	秀屿区	1	1	C17	纺织业	-0.531917	1.2424	21.3937	11	1.07476	-0.149108	3183433	0.0042222	1	1	-3.55568	3531	*ST众和	-2.13	E	-1.83	2.16	0	0	-2.46	0		master only (1)
2075	2010	1143077	12540000000	11120000000	734300000	11550000000	7720000000	3835000000	沙钢股份	2006-10-25	江苏省	苏州市	张家港市			C31	黑色金属冶炼及压延加工业	0.0635448	0.668084	23.1704	4	1.12792		8087194	0.000645	1	1	-3.29146	1623	沙钢股份	19.04	D	12.39	4	0	0	2.65	0		master only (1)
2075	2011	2418205	15000000000	13650000000	539500000	10140000000	5928000000	4216000000	沙钢股份	2006-10-25	江苏省	苏州市	张家港市			C31	黑色金属冶炼及压延加工业	0.0531811	0.584341	23.0402	5	1.09866	0.196463	34500000	0.0022994	1	1	-3.33952	2048	沙钢股份	17.19	D	9.42	4	0	0	3.77	0		master only (1)
2075	2012	8617350	12150000000	11570000000	14499506	8153000000	3959000000	4194000000	沙钢股份	2006-10-25	江苏省	苏州市	张家港市			C31	黑色金属冶炼及压延加工业	0.0017784	0.485543	22.8217	6	1.05001	-0.190165	44300000	0.0036449	1	1	-3.38977	2371	沙钢股份	15.27	D	6.58	3.69	0	0	5	0		master only (1)
2075	2013	8617350	10790000000	10240000000	40886862	8382000000	4241000000	4141000000	沙钢股份	2006-10-25	江苏省	苏州市	张家港市			C31	黑色金属冶炼及压延加工业	0.0048777	0.505938	22.8494	7	1.05337	-0.112046	9519898	0.0008825	1	1	-3.4287	2654	沙钢股份	14.65	D	6.71	2.94	0	0	5	0		master only (1)
2075	2014	9813359	10310000000	9657000000	69483235	7137000000	2927000000	4210000000	沙钢股份	2006-10-25	江苏省	苏州市	张家港市			C31	黑色金属冶炼及压延加工业	0.0097351	0.410101	22.6886	8	1.0674	-0.0443867	8597743	0.0008341	1	1	-3.474	2781	沙钢股份	15.19	D	6.8	3.39	0	0	5	0		master only (1)
2075	2015	10900000	7357000000	7036000000	-129400000	6550000000	2496000000	4054000000	沙钢股份	2006-10-25	江苏省	苏州市	张家港市			C31	黑色金属冶炼及压延加工业	-0.0197609	0.38107	22.6027	9	1.04566	-0.286254	4096495	0.0005568	1	1	-3.51593	3043	沙钢股份	12.86	D	5.07	2.79	0	0	5	0		master only (1)
2075	2016	14200000	7585000000	6697000000	434200000	7839000000	3016000000	4822000000	沙钢股份	2006-10-25	江苏省	苏州市	张家港市			C31	黑色金属冶炼及压延加工业	0.0553888	0.384815	22.7824	10	1.13275	0.0310087	6950643	0.0009163	1	1	-3.55118	2753	沙钢股份	17.17	D	9.48	3.38	0	0	4.31	0		master only (1)
2075	2017	20800000	12410000000	10160000000	1417000000	9656000000	3507000000	6149000000	沙钢股份	2006-10-25	江苏省	苏州市	张家港市			C31	黑色金属冶炼及压延加工业	0.146724	0.363175	22.9908	11	1.22207	0.636592	15400000	0.0012443	1	1	-3.58219	1746	沙钢股份	22.25	D	13.63	3.94	0	0	4.68	0	1964000	matched (3)
2078	2010	1495000	8037000000	6476000000	752500000	11600000000	7374000000	4221000000	太阳纸业	2006-11-16	山东省	济宁市	兖州区			C22	造纸及纸制品业	0.0648963	0.635957	23.1739	4	1.24101		41000000	0.0050973	1	1	-3.29122	1442	太阳纸业	19.91	D	15.29	1.54	0	0	3.08	0		master only (1)
2078	2011	1495000	8762000000	7325000000	562800000	15190000000	10660000000	4528000000	太阳纸业	2006-11-16	山东省	济宁市	兖州区			C22	造纸及纸制品业	0.0370551	0.701886	23.4438	5	1.19618	0.0902445	126000000	0.0143931	1	1	-3.30978	500	太阳纸业	48.99	C	16.54	9.83	7	14	1.62	0		master only (1)
2078	2012	1495000	10410000000	8999000000	219300000	15170000000	10720000000	4456000000	太阳纸业	2006-11-16	山东省	济宁市	兖州区			C22	造纸及纸制品业	0.0144537	0.706315	23.4428	6	1.15667	0.187883	97200000	0.0093406	1	1	-3.34987	463	太阳纸业	58.06	C	14.64	7.78	9	25	1.64	0		master only (1)
2078	2013	1776539	10900000000	9050000000	318000000	15890000000	10370000000	5522000000	太阳纸业	2006-11-16	山东省	济宁市	兖州区			C22	造纸及纸制品业	0.0200099	0.652473	23.4889	7	1.20393	0.0467355	30600000	0.0028054	1	1	-3.38558	414	太阳纸业	62.52	B	15.73	9.79	12	20	5	0		master only (1)
2078	2014	3874248	10460000000	8361000000	546900000	16290000000	10470000000	5825000000	太阳纸业	2006-11-16	山东省	济宁市	兖州区			C22	造纸及纸制品业	0.0335691	0.642497	23.514	8	1.25081	-0.0401293	33100000	0.003163	1	1	-3.42318	1846	太阳纸业	19.76	D	14.99	1.22	0	0	3.55	0		master only (1)
2078	2015	4301599	10830000000	8293000000	755100000	19720000000	12320000000	7394000000	太阳纸业	2006-11-16	山东省	济宁市	兖州区			C22	造纸及纸制品业	0.0382953	0.625026	23.7048	9	1.30537	0.0351163	85000000	0.0078492	1	1	-3.44309	1690	太阳纸业	21.23	D	15.27	0.96	0	0	5	0		master only (1)
2078	2016	5837889	14460000000	11290000000	1158000000	20190000000	11850000000	8340000000	太阳纸业	2006-11-16	山东省	济宁市	兖州区			C22	造纸及纸制品业	0.0573533	0.587013	23.7287	10	1.28068	0.335365	19800000	0.0013715	1	1	-3.48036	117	太阳纸业	68.75	B	17.25	9.76	15	23	3.74	0		master only (1)
2078	2017	5837889	18890000000	13980000000	2250000000	26060000000	15230000000	10820000000	太阳纸业	2006-11-16	山东省	济宁市	兖州区			C22	造纸及纸制品业	0.0863565	0.584588	23.9835	11	1.35194	0.307067	36000000	0.0019066	1	1	-3.48812	1377	太阳纸业	24.01	D	19.08	0.64	0	0	4.29	0	3713000	matched (3)
2080	2010	27100000	2573000000	1826000000	311100000	4526000000	2197000000	2330000000	中材科技	2006-11-20	江苏省	南京市	江宁区	2	2	C30	非金属矿物制品业	0.0687288	0.485304	22.2331	4	1.40944		76800000	0.0298399	1	1	-3.31696	115	中材科技	61.88	B	16.46	10.24	14	17	4.18	1		master only (1)
2080	2011	30100000	2531000000	2026000000	134900000	4639000000	2234000000	2405000000	中材科技	2006-11-20	江苏省	南京市	江宁区	2	2	C30	非金属矿物制品业	0.0290742	0.481498	22.2577	5	1.24961	-0.0163413	85800000	0.0338966	1	1	-3.35726	319	中材科技	58.95	C	15.45	12.33	13	14	4.17	1		master only (1)
2080	2012	39700000	2803000000	2223000000	144000000	5914000000	3237000000	2677000000	中材科技	2006-11-20	江苏省	南京市	江宁区	2	2	C30	非金属矿物制品业	0.0243445	0.547422	22.5006	6	1.2612	0.10737	117000000	0.0416236	1	1	-3.39739	92	中材科技	73.19	B	17.18	12.57	12	27	4.44	1		master only (1)
2080	2013	104000000	3443000000	2683000000	121900000	6493000000	3886000000	2607000000	中材科技	2006-11-20	江苏省	南京市	江宁区	2	2	C30	非金属矿物制品业	0.0187758	0.598522	22.594	7	1.28351	0.228246	147000000	0.0426868	1	1	-3.43609	2287	中材科技	17.88	D	12.65	1.79	0	0	3.44	1		master only (1)
2080	2014	140000000	4424000000	3490000000	172800000	8055000000	5309000000	2746000000	中材科技	2006-11-20	江苏省	南京市	江宁区	2	2	C30	非金属矿物制品业	0.0214465	0.659114	22.8096	8	1.2678	0.285029	101000000	0.0227629	1	1	-3.47022	26	中材科技	73.07	B	17.72	13.03	15	23	4.32	1	351876	matched (3)
2080	2015	164000000	5828000000	4568000000	336800000	7998000000	4910000000	3087000000	中材科技	2006-11-20	江苏省	南京市	江宁区	2	2	C30	非金属矿物制品业	0.0421152	0.613958	22.8024	9	1.27579	0.317132	159000000	0.0273165	1	1	-3.51048	38	中材科技	74	B	14.35	13.06	15	27.5	4.09	1	0	matched (3)
2080	2016	262000000	8969000000	6669000000	423500000	20580000000	12290000000	8285000000	中材科技	2006-11-20	江苏省	南京市	江宁区	2	2	C30	非金属矿物制品业	0.0205795	0.597378	23.7474	10	1.34478	0.539047	212000000	0.023609	1	1	-3.47817	13	中材科技	80.58	A	18.16	13.03	15	30	4.39	1		master only (1)
2080	2017	341000000	10270000000	7419000000	810500000	22440000000	13320000000	9125000000	中材科技	2006-11-20	江苏省	南京市	江宁区	2	2	C30	非金属矿物制品业	0.0361196	0.593373	23.8341	11	1.38407	0.144821	154000000	0.0149657	1	1	-3.5077	1380	中材科技	23.98	D	18.8	1.92	0	0	3.26	1		master only (1)
2082	2010	9401.71	8054000000	7736000000	155500000	1317000000	380500000	936100000	万邦德	2006-11-20	浙江省	湖州市	湖州市	1	2	C32	有色金属冶炼和压延加工业	0.11809	0.288973	20.9983	4	1.04113		3178982	0.0003947	1	1	-3.23524	1423	栋梁新材	20.01	D	15.06	1.27	0	0	3.68	0		master only (1)
2082	2011	9401.71	10870000000	10550000000	162500000	1446000000	392200000	1054000000	万邦德	2006-11-20	浙江省	湖州市	湖州市	1	2	C32	有色金属冶炼和压延加工业	0.112329	0.271192	21.0923	5	1.03107	0.350169	3032203	0.0002789	1	1	-3.28607	430	栋梁新材	53.05	C	11.77	8.87	12	17	3.41	0		master only (1)
2082	2012	9401.71	10970000000	10730000000	90943048	1567000000	469100000	1097000000	万邦德	2006-11-20	浙江省	湖州市	湖州市	1	2	C32	有色金属冶炼和压延加工业	0.0580548	0.299452	21.1721	6	1.02239	0.0091096	3253552	0.0002965	1	1	-3.33467	285	栋梁新材	64.85	B	16.41	10.14	15	20	3.3	0		master only (1)
2082	2013	9401.71	11790000000	11510000000	117300000	1549000000	361100000	1188000000	万邦德	2006-11-20	浙江省	湖州市	湖州市	1	2	C32	有色金属冶炼和压延加工业	0.0757004	0.233107	21.1608	7	1.02369	0.0741292	4000866	0.0003394	1	1	-3.37349	521	栋梁新材	58.06	C	13.19	9.81	15	17	3.06	0		master only (1)
2082	2014	9401.71	11450000000	11180000000	113300000	1551000000	254700000	1296000000	万邦德	2006-11-20	浙江省	湖州市	湖州市	1	2	C32	有色金属冶炼和压延加工业	0.0730803	0.164208	21.1622	8	1.02431	-0.0283924	4743617	0.0004142	1	1	-3.41363	90	栋梁新材	59.62	C	14.95	9.75	15	17	2.92	0		master only (1)
2082	2015	9401.71	11570000000	11390000000	68433410	1617000000	270300000	1347000000	万邦德	2006-11-20	浙江省	湖州市	湖州市	1	2	C32	有色金属冶炼和压延加工业	0.0423141	0.167122	21.204	9	1.01606	0.0105228	4946994	0.0004275	1	1	-3.45796	2090	栋梁新材	19.31	D	14.56	1.52	0	0	3.23	0		master only (1)
2082	2016	766683	9183000000	9009000000	73384933	1658000000	261800000	1397000000	万邦德	2006-11-20	浙江省	湖州市	湖州市	1	2	C32	有色金属冶炼和压延加工业	0.0442498	0.15789	21.2291	10	1.01941	-0.20642	7013990	0.0007638	1	1	-3.50048	2279	栋梁新材	19.69	D	16.77	1.18	0	0	1.74	0		master only (1)
2082	2017	57900000	14640000000	14410000000	100400000	2100000000	496600000	1603000000	万邦德	2006-11-20	浙江省	湖州市	湖州市	1	2	C32	有色金属冶炼和压延加工业	0.0478129	0.236462	21.4652	11	1.01571	0.593675	6526304	0.0004459	1	1	-3.56156	2873	栋梁新材	15.57	D	11.17	1.61	0	0	2.79	0		master only (1)
2083	2010	3541996	4250000000	3455000000	187000000	7184000000	4469000000	2715000000	孚日股份	2006-11-24	山东省	潍坊市	高密市			C17	纺织业	0.0260275	0.622121	22.6951	4	1.23008		3320687	0.0007814	1	1	-3.31383	1213	孚日股份	21.25	D	10.93	0.43	0	0	9.89	0	0	matched (3)
2083	2011	37500000	4611000000	3815000000	138200000	7395000000	4541000000	2855000000	孚日股份	2006-11-24	山东省	潍坊市	高密市			C17	纺织业	0.0186874	0.614006	22.7241	5	1.2086	0.0850971	55700000	0.012081	1	1	-3.35302	1436	孚日股份	21.56	D	12.12	0.46	0	0	8.98	0	205333	matched (3)
2083	2012	38200000	4470000000	3756000000	15998301	6926000000	4113000000	2813000000	孚日股份	2006-11-24	山东省	潍坊市	高密市			C17	纺织业	0.0023098	0.593824	22.6586	6	1.19012	-0.0306184	125000000	0.0279038	1	1	-3.39475	2223	孚日股份	16.95	D	6.4	0.55	0	0	10	0	0	matched (3)
2083	2013	38600000	4443000000	3449000000	92690306	6941000000	4151000000	2790000000	孚日股份	2006-11-24	山东省	潍坊市	高密市			C17	纺织业	0.0133532	0.598033	22.6608	7	1.28796	-0.0061085	27100000	0.0060963	1	1	-3.4347	1113	孚日股份	25.11	D	14.53	0.58	0	0	10	0		master only (1)
2083	2014	5479350	4523000000	3616000000	75134769	7772000000	5000000000	2772000000	孚日股份	2006-11-24	山东省	潍坊市	高密市			C17	纺织业	0.0096676	0.643289	22.7738	8	1.25083	0.01816	107000000	0.023745	1	1	-3.47147	3262	孚日股份	6.18	D	15.6	0.58	0	0	-10	0		master only (1)
2083	2015	6473178	4184000000	3252000000	312600000	7662000000	4670000000	2992000000	孚日股份	2006-11-24	山东省	潍坊市	高密市			C17	纺织业	0.0407969	0.609528	22.7596	9	1.28667	-0.0750803	15400000	0.0036739	1	1	-3.51193	502	孚日股份	30	D	19.88	0.76	0	0	9.36	0	248462	matched (3)
2083	2016	6485717	4375000000	3350000000	380800000	7125000000	3935000000	3190000000	孚日股份	2006-11-24	山东省	潍坊市	高密市			C17	纺织业	0.0534415	0.552236	22.6868	10	1.306	0.0456997	7803165	0.0017836	1	1	-3.55405	795	孚日股份	29.51	D	20.63	0.68	0	0	8.2	0	49000	matched (3)
2083	2017	6690055	4822000000	3771000000	414000000	7409000000	4081000000	3329000000	孚日股份	2006-11-24	山东省	潍坊市	高密市			C17	纺织业	0.05588	0.550772	22.726	11	1.27874	0.102103	37200000	0.0077105	1	1	-3.59297	361	孚日股份	29.93	D	20.92	0.62	0	0	8.39	0	49000	matched (3)
2087	2010	0	2408000000	2109000000	90130741	3938000000	2283000000	1655000000	新野纺织	2006-11-30	河南省	南阳市	新野县	1	2	C17	纺织业	0.022885	0.579734	22.094	4	1.14189		36800000	0.0152987	2	0	-3.31431	1178	新野纺织	21.45	D	10.97	0.48	0	0	10	1		master only (1)
2087	2011	0	2972000000	2645000000	102300000	4333000000	2544000000	1789000000	新野纺织	2006-11-30	河南省	南阳市	新野县	1	2	C17	纺织业	0.0236055	0.58716	22.1895	5	1.12341	0.234015	60600000	0.0204056	2	0	-3.35631	1901	新野纺织	18.37	D	11.77	0.83	0	0	5.77	1		master only (1)
2087	2012	185900	3158000000	2781000000	80151409	4640000000	2853000000	1788000000	新野纺织	2006-11-30	河南省	南阳市	新野县	1	2	C17	纺织业	0.0172722	0.614765	22.2581	6	1.13558	0.0626277	71800000	0.0227374	2	0	-3.39726	1789	新野纺织	20.03	D	9	1.14	0	0	9.89	1		master only (1)
2087	2013	185900	3260000000	2856000000	80122664	5006000000	3135000000	1870000000	新野纺织	2006-11-30	河南省	南阳市	新野县	1	2	C17	纺织业	0.0160062	0.626359	22.3339	7	1.1413	0.0324038	77700000	0.0238494	2	0	-3.43784	1715	新野纺织	20.79	D	10.68	0.88	0	0	9.23	1		master only (1)
2087	2014	185900	3399000000	2955000000	82789799	5589000000	3667000000	1921000000	新野纺织	2006-11-30	河南省	南阳市	新野县	1	2	C17	纺织业	0.0148139	0.656238	22.444	8	1.15055	0.0427688	59500000	0.0175151	2	0	-3.47781	2214	新野纺织	18.3	D	11.11	0.93	0	0	6.26	1		master only (1)
2087	2015	185900	3047000000	2557000000	117200000	6217000000	4193000000	2024000000	新野纺织	2006-11-30	河南省	南阳市	新野县	1	2	C17	纺织业	0.0188555	0.674466	22.5506	9	1.19158	-0.103767	110000000	0.0362277	2	0	-3.51679	2701	新野纺织	16.4	D	11.21	1.28	0	0	3.91	1		master only (1)
2087	2016	185900	4085000000	3367000000	207500000	7934000000	4984000000	2951000000	新野纺织	2006-11-30	河南省	南阳市	新野县	1	2	C17	纺织业	0.0261462	0.628088	22.7945	10	1.21322	0.340944	127000000	0.0311759	2	0	-3.55076	418	新野纺织	55.35	C	12.78	6.91	18	15	2.66	1		master only (1)
2087	2017	449148	5195000000	4298000000	293100000	9118000000	5843000000	3275000000	新野纺织	2006-11-30	河南省	南阳市	新野县	1	2	C17	纺织业	0.0321433	0.640856	22.9335	11	1.20884	0.27163	12600000	0.0024217	2	0	-3.58503	2642	新野纺织	17.5	D	13.66	0.98	0	0	2.86	1		master only (1)
2088	2010	0	918300000	621700000	122800000	1669000000	365000000	1304000000	鲁阳节能	2006-11-30	山东省	淄博市	沂源县	1	2	C30	非金属矿物制品业	0.0735502	0.218674	21.2357	4	1.47721		8933193	0.0097275	1	1	-3.26113	1603	鲁阳节能	19.15	D	15.45	0.88	0	0	2.82	0		master only (1)
2088	2011	0	979800000	668700000	108200000	1708000000	319000000	1389000000	鲁阳节能	2006-11-30	山东省	淄博市	沂源县	1	2	C30	非金属矿物制品业	0.0633311	0.186756	21.2586	5	1.46533	0.0669299	2543000	0.0025954	1	1	-3.30337	1719	鲁阳节能	19.58	D	16.05	0.71	0	0	2.82	0		master only (1)
2088	2012	0	1003000000	710200000	84635607	1850000000	399900000	1450000000	鲁阳节能	2006-11-30	山东省	淄博市	沂源县	1	2	C30	非金属矿物制品业	0.0457457	0.216137	21.3385	6	1.4128	0.0240217	4140930	0.0041271	1	1	-3.35084	1998	鲁阳节能	18.63	D	15.88	0.74	0	0	2.01	0		master only (1)
2088	2013	0	1026000000	715100000	86469201	1884000000	370700000	1513000000	鲁阳节能	2006-11-30	山东省	淄博市	沂源县	1	2	C30	非金属矿物制品业	0.0458967	0.196749	21.3567	7	1.43548	0.023039	8395389	0.008179	1	1	-3.39246	2120	鲁阳节能	18.72	D	15.69	0.74	0	0	2.29	0		master only (1)
2088	2014	0	1178000000	831600000	78485427	1973000000	404700000	1568000000	鲁阳节能	2006-11-30	山东省	淄博市	沂源县	1	2	C30	非金属矿物制品业	0.0397776	0.205105	21.4029	8	1.41618	0.147368	5601948	0.0047566	1	1	-3.43646	2383	鲁阳节能	17.62	D	14.93	0.77	0	0	1.92	0		master only (1)
2088	2015	1340706	1133000000	799500000	57545660	2101000000	498900000	1603000000	鲁阳节能	2006-11-30	山东省	淄博市	沂源县	1	2	C30	非金属矿物制品业	0.0273837	0.237406	21.4659	9	1.41673	-0.03819	9681682	0.0085471	1	1	-3.48161	2369	鲁阳节能	18.13	D	13.83	1.23	0	0	3.07	0		master only (1)
2088	2016	5384262	1190000000	799300000	104700000	2117000000	433300000	1684000000	鲁阳节能	2006-11-30	山东省	淄博市	沂源县	1	2	C30	非金属矿物制品业	0.0494394	0.204654	21.4733	10	1.48815	0.0501187	26200000	0.0220189	1	1	-3.5222	1887	鲁阳节能	21.73	D	15.73	2.35	0	0	3.65	0		master only (1)
2088	2017	5384262	1596000000	998100000	213800000	2440000000	565700000	1874000000	鲁阳节能	2006-11-30	山东省	淄博市	沂源县	1	2	C30	非金属矿物制品业	0.0876065	0.231862	21.6152	11	1.59882	0.341535	27000000	0.0169199	1	1	-3.57246	424	鲁阳节能	29.38	D	23.6	3.37	0	0	2.41	0	337750	matched (3)
2092	2010	18900000	4081000000	3139000000	290500000	9668000000	3044000000	6624000000	中泰化学	2006-12-08	新疆维吾尔自治区	乌鲁木齐市	沙依巴克区			C26	化学原料及化学制品制造业	0.0300457	0.314845	22.9921	4	1.30028		17400000	0.0042631	3	0	-3.30213	54	中泰化学	66.14	B	12.37	9.56	15	24	5.21	1	14000	matched (3)
2092	2011	43600000	7122000000	5533000000	523400000	15280000000	7695000000	7582000000	中泰化学	2006-12-08	新疆维吾尔自治区	乌鲁木齐市	沙依巴克区			C26	化学原料及化学制品制造业	0.0342592	0.5037	23.4496	5	1.28733	0.745211	10400000	0.0014602	3	0	-3.30925	121	中泰化学	69.21	B	17.18	11.93	15	20	5.1	1	30000	matched (3)
2092	2012	47700000	7113000000	5682000000	267500000	21910000000	14740000000	7172000000	中泰化学	2006-12-08	新疆维吾尔自治区	乌鲁木齐市	沙依巴克区			C26	化学原料及化学制品制造业	0.0122091	0.672705	23.8104	6	1.25173	-0.0013383	41800000	0.0058824	3	0	-3.31063	59	中泰化学	75.47	B	19.01	9.03	15	27	5.43	1	131000	matched (3)
2092	2013	66100000	12050000000	9381000000	115800000	25000000000	16360000000	8649000000	中泰化学	2006-12-08	新疆维吾尔自治区	乌鲁木齐市	沙依巴克区			C26	化学原料及化学制品制造业	0.0046312	0.654088	23.9423	7	1.284	0.693525	53100000	0.0044064	3	0	-3.33371	42	中泰化学	77.67	B	15.69	9.02	15	30	7.96	1	2952900	matched (3)
2092	2014	79800000	11180000000	8125000000	337100000	31710000000	21490000000	10220000000	中泰化学	2006-12-08	新疆维吾尔自治区	乌鲁木齐市	沙依巴克区			C26	化学原料及化学制品制造业	0.0106299	0.677649	24.18	8	1.37554	-0.0721327	40600000	0.0036318	3	0	-3.33945	2935	中泰化学	13.72	D	10.7	0.18	0	0	2.84	1	96000	matched (3)
2092	2015	82500000	15260000000	11740000000	187500000	37030000000	25060000000	11960000000	中泰化学	2006-12-08	新疆维吾尔自治区	乌鲁木齐市	沙依巴克区			C26	化学原料及化学制品制造业	0.0050634	0.676864	24.3349	9	1.29978	0.365596	288000000	0.0188745	3	0	-3.35451	3000	中泰化学	13.5	D	8.37	0.66	0	0	4.47	1	6704334	matched (3)
2092	2016	88000000	23360000000	17200000000	1936000000	46670000000	29990000000	16680000000	中泰化学	2006-12-08	新疆维吾尔自治区	乌鲁木齐市	沙依巴克区			C26	化学原料及化学制品制造业	0.0414888	0.642542	24.5663	10	1.35793	0.530631	327000000	0.0139763	3	0	-3.35341	112	中泰化学	69.34	B	16.82	11.99	15	23	2.53	1	290000	matched (3)
2092	2017	102000000	41060000000	33730000000	2453000000	55630000000	36480000000	19150000000	中泰化学	2006-12-08	新疆维吾尔自治区	乌鲁木齐市	沙依巴克区			C26	化学原料及化学制品制造业	0.0440973	0.655794	24.7419	11	1.21724	0.757489	103000000	0.0024969	3	0	-3.35914	1329	中泰化学	24.24	D	17.25	3.98	0	0	3.01	1	325000	matched (3)
2094	2010	0	799800000	665200000	37580368	878100000	416600000	461500000	青岛金王	2006-12-15	山东省	青岛市	即墨区			C26	化学原料及化学制品制造业	0.0427976	0.474383	20.5933	4	1.2023		403610	0.0005047	1	1	-3.17987	2110	青岛金王	13.86	D	11.31	0.56	0	0	1.99	0		master only (1)
2094	2011	7531345	1094000000	925900000	50304362	1001000000	500300000	500900000	青岛金王	2006-12-15	山东省	青岛市	即墨区			C26	化学原料及化学制品制造业	0.0502418	0.49971	20.7245	5	1.1811	0.367341	2198100	0.0020101	1	1	-3.23936	2366	青岛金王	12.38	D	10.03	0.49	0	0	1.86	0		master only (1)
2094	2012	7996112	1425000000	1208000000	52354600	1118000000	565400000	552600000	青岛金王	2006-12-15	山东省	青岛市	即墨区			C26	化学原料及化学制品制造业	0.0468289	0.505752	20.8348	6	1.18018	0.303161	807944	0.0005669	1	1	-3.29459	2427	青岛金王	14.38	D	11.17	0.52	0	0	2.69	0		master only (1)
2094	2013	8534194	1454000000	1249000000	54314459	1108000000	504600000	603400000	青岛金王	2006-12-15	山东省	青岛市	即墨区			C26	化学原料及化学制品制造业	0.0490192	0.455394	20.8258	7	1.16454	0.0202987	581982	0.0004003	1	1	-3.33339	2262	青岛金王	17.97	D	15.17	0.49	0	0	2.31	0		master only (1)
2094	2014	8555202	1224000000	1042000000	49190559	1228000000	594800000	632800000	青岛金王	2006-12-15	山东省	青岛市	即墨区			C26	化学原料及化学制品制造业	0.0400726	0.484528	20.9283	8	1.17415	-0.158522	460243	0.0003762	1	1	-3.38668	2907	青岛金王	14.02	D	10.06	0.94	0	0	3.02	0		master only (1)
2094	2015	8728348	1477000000	1159000000	113100000	1918000000	1114000000	804000000	青岛金王	2006-12-15	山东省	青岛市	即墨区			C26	化学原料及化学制品制造业	0.0589714	0.580814	21.3745	9	1.27416	0.207091	3116284	0.00211	1	1	-3.47403	2646	青岛金王	16.76	D	12.32	1.32	0	0	3.12	0		master only (1)
2094	2016	14400000	2371000000	1883000000	199400000	2884000000	960500000	1924000000	青岛金王	2006-12-15	山东省	青岛市	即墨区			C26	化学原料及化学制品制造业	0.0691268	0.332997	21.7826	10	1.25898	0.6054	4946521	0.0020863	1	1	-3.54234	2807	青岛金王	16.86	D	13.3	0.45	0	0	3.11	0	300000	matched (3)
2094	2017	149000000	4677000000	3680000000	444800000	4660000000	1794000000	2866000000	青岛金王	2006-12-15	山东省	青岛市	即墨区			C26	化学原料及化学制品制造业	0.095444	0.38494	22.2623	11	1.27087	0.97239	9557210	0.0020437	1	1	-3.59731	1777	青岛金王	22.09	D	18.16	0.86	0	0	3.07	0	0	matched (3)
2096	2010	3969040	626700000	334500000	123400000	706500000	205900000	500600000	南岭民爆	2006-12-22	湖南省	永州市	双牌县			C26	化学原料及化学制品制造业	0.174651	0.291447	20.3758	4	1.87348		13000000	0.0207747	2	0	-3.14433	910	南岭民爆	23.45	D	18.35	0.12	0	0	4.98	1		master only (1)
2096	2011	3969040	652900000	404400000	99376857	807700000	237200000	570500000	南岭民爆	2006-12-22	湖南省	永州市	双牌县			C26	化学原料及化学制品制造业	0.123033	0.293645	20.5097	5	1.61465	0.0417701	748569	0.0011465	2	0	-3.2067	1410	南岭民爆	21.78	D	18.24	0.08	0	0	3.46	1		master only (1)
2096	2012	14500000	1588000000	998700000	179900000	2541000000	772600000	1769000000	南岭民爆	2006-12-22	湖南省	永州市	双牌县			C26	化学原料及化学制品制造业	0.0708028	0.304002	21.656	6	1.58981	1.43172	10700000	0.0067156	2	0	-3.37509	1538	南岭民爆	21.98	D	17.93	0.62	0	0	3.43	1		master only (1)
2096	2013	15000000	1670000000	1025000000	203300000	2827000000	884800000	1943000000	南岭民爆	2006-12-22	湖南省	永州市	双牌县			C26	化学原料及化学制品制造业	0.0719142	0.312933	21.7626	7	1.62898	0.0517971	7789900	0.0046649	2	0	-3.42129	1350	南岭民爆	23.31	D	18.58	1.33	0	0	3.4	1		master only (1)
2096	2014	17800000	1791000000	1044000000	219400000	3095000000	991900000	2103000000	南岭民爆	2006-12-22	湖南省	永州市	双牌县			C26	化学原料及化学制品制造业	0.0708895	0.320496	21.853	8	1.71504	0.0726114	14000000	0.0078023	2	0	-3.46578	1177	南岭民爆	23.12	D	18.49	1.52	0	0	3.11	1	500000	matched (3)
2096	2015	18600000	2199000000	1485000000	125800000	3698000000	1307000000	2391000000	南岭民爆	2006-12-22	湖南省	永州市	双牌县			C26	化学原料及化学制品制造业	0.0340117	0.35334	22.031	9	1.48076	0.22744	15900000	0.0072407	2	0	-3.51256	2463	南岭民爆	17.75	D	12.58	1.02	0	0	4.15	1		master only (1)
2096	2016	18600000	2661000000	2002000000	39665621	4458000000	2363000000	2094000000	南岭民爆	2006-12-22	湖南省	永州市	双牌县			C26	化学原料及化学制品制造业	0.0088982	0.530163	22.2179	10	1.3295	0.210526	11200000	0.0042131	2	0	-3.55675	2919	南岭民爆	15.95	D	9.86	1.09	0	0	5	1		master only (1)
2096	2017	21300000	2624000000	1950000000	25579418	3896000000	1841000000	2055000000	南岭民爆	2006-12-22	湖南省	永州市	双牌县			C26	化学原料及化学制品制造业	0.0065659	0.4725	22.0832	11	1.34605	-0.0139969	16100000	0.006144	2	0	-3.59403	2889	南岭民爆	15.48	D	9.43	1.05	0	0	5	1	160000	matched (3)
2108	2010	279106	1363000000	1080000000	120200000	1187000000	555800000	631000000	沧州明珠	2007-01-24	河北省	沧州市	运河区			C29	橡胶和塑料制品业	0.101295	0.468343	20.8945	3	1.26224		666600	0.000489	1	1	-3.1824	1136	沧州明珠	21.74	D	16.48	1.08	0	0	4.18	0		master only (1)
2108	2011	507914	1660000000	1399000000	101500000	1290000000	564900000	724800000	沧州明珠	2007-01-24	河北省	沧州市	运河区			C29	橡胶和塑料制品业	0.0787243	0.438028	20.9777	4	1.18679	0.217986	4103859	0.0024719	1	1	-3.23276	1484	沧州明珠	21.21	D	15.43	1.3	0	0	4.48	0		master only (1)
2108	2012	2024017	1762000000	1455000000	124400000	1780000000	670700000	1109000000	沧州明珠	2007-01-24	河北省	沧州市	运河区			C29	橡胶和塑料制品业	0.0698822	0.376822	21.2998	5	1.21145	0.0615399	7781038	0.0044151	1	1	-3.30729	1170	沧州明珠	24.93	D	19.6	1.01	0	0	4.32	0		master only (1)
2108	2013	2399658	1983000000	1607000000	151900000	2146000000	946300000	1200000000	沧州明珠	2007-01-24	河北省	沧州市	运河区			C29	橡胶和塑料制品业	0.070786	0.440928	21.487	6	1.23381	0.125168	5827920	0.002939	1	1	-3.36326	979	沧州明珠	26.44	D	20.44	1.45	0	0	4.55	0		master only (1)
2108	2014	2498034	2090000000	1669000000	169300000	2519000000	892100000	1627000000	沧州明珠	2007-01-24	河北省	沧州市	运河区			C29	橡胶和塑料制品业	0.0672014	0.354125	21.6472	7	1.2523	0.0539472	7846455	0.0037544	1	1	-3.41453	1462	沧州明珠	21.68	D	15.68	1.5	0	0	4.5	0		master only (1)
2108	2015	3605211	2175000000	1654000000	215400000	2435000000	643600000	1792000000	沧州明珠	2007-01-24	河北省	沧州市	运河区			C29	橡胶和塑料制品业	0.0884408	0.264277	21.6134	8	1.31484	0.040814	8673737	0.0039875	1	1	-3.45234	859	沧州明珠	25.95	D	20.36	1.81	0	0	3.78	0		master only (1)
2108	2016	3686408	2765000000	1856000000	486600000	3631000000	859100000	2772000000	沧州明珠	2007-01-24	河北省	沧州市	运河区			C29	橡胶和塑料制品业	0.133993	0.23657	22.0129	9	1.48937	0.27103	5882083	0.0021275	1	1	-3.512	946	沧州明珠	27.69	D	21.84	2.21	0	0	3.64	0		master only (1)
2108	2017	3945724	3524000000	2539000000	545100000	3829000000	614000000	3215000000	沧州明珠	2007-01-24	河北省	沧州市	运河区			C29	橡胶和塑料制品业	0.142359	0.160376	22.0658	10	1.38813	0.274746	13300000	0.0037644	1	1	-3.55357	1857	沧州明珠	21.72	D	15.4	2.18	0	0	4.14	0		master only (1)
2109	2010	9992143	1029000000	770600000	95721625	1588000000	504300000	1084000000	兴化股份	2007-01-26	陕西省	咸阳市	兴平市			C26	化学原料及化学制品制造业	0.0602735	0.317519	21.1858	3	1.33505		2428572	0.0023606	3	0	-3.2161	1855	兴化股份	17.12	D	13.49	0.79	0	0	2.84	1		master only (1)
2109	2011	9992143	1394000000	972000000	172900000	1728000000	498800000	1229000000	兴化股份	2007-01-26	陕西省	咸阳市	兴平市			C26	化学原料及化学制品制造业	0.100054	0.288674	21.2702	4	1.43439	0.355161	1578571	0.0011322	3	0	-3.2645	1057	兴化股份	24.73	D	20.96	0.9	0	0	2.87	1		master only (1)
2109	2012	10700000	1444000000	1062000000	128200000	1734000000	442300000	1292000000	兴化股份	2007-01-26	陕西省	咸阳市	兴平市			C26	化学原料及化学制品制造业	0.0739094	0.255106	21.2736	5	1.35929	0.0354383	1558571	0.0010796	3	0	-3.30482	1380	兴化股份	23.11	D	19.33	0.96	0	0	2.82	1		master only (1)
2109	2013	10700000	1119000000	907800000	61503780	1891000000	572100000	1319000000	兴化股份	2007-01-26	陕西省	咸阳市	兴平市			C26	化学原料及化学制品制造业	0.0325172	0.302447	21.3606	6	1.23275	-0.224834	2350372	0.0021003	3	0	-3.35281	2814	兴化股份	12.2	D	9.45	1.53	0	0	1.22	1		master only (1)
2109	2014	11600000	948300000	898300000	-150600000	1940000000	771600000	1168000000	兴化股份	2007-01-26	陕西省	咸阳市	兴平市			C26	化学原料及化学制品制造业	-0.0776576	0.397828	21.3858	7	1.0556	-0.152605	1468571	0.0015487	3	0	-3.395	3378	兴化股份	1.48	D	-0.17	1.51	0	0	0.14	1		master only (1)
2109	2015	11600000	2290000000	2102000000	-149100000	1773000000	741400000	1032000000	兴化股份	2007-01-26	陕西省	咸阳市	兴平市			C26	化学原料及化学制品制造业	-0.0840829	0.418143	21.296	8	1.08957	1.41465	3405572	0.0014873	3	0	-3.42694	3325	兴化股份	3.24	D	-0.78	3.86	0	0	0.16	1		master only (1)
2109	2016	24300000	2038000000	1769000000	28168737	4439000000	1317000000	3122000000	兴化股份	2007-01-26	陕西省	咸阳市	兴平市			C26	化学原料及化学制品制造业	0.0063455	0.296608	22.2137	9	1.15173	-0.110123	55700000	0.0273131	3	0	-3.51669	3211	兴化股份	12.22	D	6.45	0.77	0	0	5	1	3000000	matched (3)
2109	2017	24300000	1894000000	1546000000	206400000	4123000000	786800000	3336000000	兴化股份	2007-01-26	陕西省	咸阳市	兴平市			C26	化学原料及化学制品制造业	0.0500679	0.190848	22.1398	10	1.22524	-0.070492	0	0	3	0	-3.55537	3019	兴化股份	14.18	D	10.88	1.07	0	0	2.23	1		master only (1)
2110	2010	9356699	15980000000	15340000000	109900000	7647000000	4931000000	2716000000	三钢闽光	2007-01-26	福建省	三明市	梅列区	1	1	C31	黑色金属冶炼及压延加工业	0.0143771	0.644824	22.7576	3	1.04205		1000000	6.26e-05	1	1	-3.272	392	三钢闽光	50.87	C	11.62	10.25	12	12	5	1		master only (1)
2110	2011	9454699	19280000000	18400000000	253300000	9021000000	6063000000	2959000000	三钢闽光	2007-01-26	福建省	三明市	梅列区	1	1	C31	黑色金属冶炼及压延加工业	0.0280728	0.672046	22.9229	4	1.04815	0.206625	1062500	5.51e-05	1	1	-3.30553	517	三钢闽光	47.72	C	12.02	7.28	12	14	2.42	1		master only (1)
2110	2012	9454699	18280000000	17940000000	-215400000	8753000000	6015000000	2738000000	三钢闽光	2007-01-26	福建省	三明市	梅列区	1	1	C31	黑色金属冶炼及压延加工业	-0.0246136	0.687201	22.8926	5	1.01921	-0.0518758	1062500	5.81e-05	1	1	-3.34689	540	三钢闽光	55.01	C	5.12	12.75	12	20	5.14	1		master only (1)
2110	2013	9454699	19300000000	18660000000	41385601	8603000000	6006000000	2597000000	三钢闽光	2007-01-26	福建省	三明市	梅列区	1	1	C31	黑色金属冶炼及压延加工业	0.0048107	0.69808	22.8754	6	1.03442	0.0556253	8708333	0.0004512	1	1	-3.38763	539	三钢闽光	56.78	C	9.6	13.22	15	17	1.96	1		master only (1)
2110	2014	13700000	18020000000	17460000000	31952705	8037000000	5444000000	2593000000	三钢闽光	2007-01-26	福建省	三明市	梅列区	1	1	C31	黑色金属冶炼及压延加工业	0.0039758	0.677343	22.8073	7	1.03249	-0.0661298	3538333	0.0001963	1	1	-3.4303	3122	三钢闽光	11.34	D	8.34	1.75	0	0	1.25	1		master only (1)
2110	2015	16800000	12540000000	13100000000	-928600000	7124000000	5475000000	1649000000	三钢闽光	2007-01-26	福建省	三明市	梅列区	1	1	C31	黑色金属冶炼及压延加工业	-0.130351	0.76853	22.6867	8	0.957087	-0.304088	851412	6.79e-05	1	1	-3.47405	253	三钢闽光	52.11	C	-0.18	12.29	15	20	5	1	94829.1	matched (3)
2110	2016	33500000	14120000000	12350000000	926500000	12580000000	5278000000	7298000000	三钢闽光	2007-01-26	福建省	三明市	梅列区	1	1	C31	黑色金属冶炼及压延加工业	0.0736784	0.419669	23.255	9	1.14318	0.125657	1124456	7.96e-05	1	1	-3.48543	154	三钢闽光	67.33	B	20.58	10.32	12	20	4.43	1	253093	matched (3)
2110	2017	35900000	22460000000	16600000000	3990000000	15750000000	4740000000	11010000000	三钢闽光	2007-01-26	福建省	三明市	梅列区	1	1	C31	黑色金属冶炼及压延加工业	0.253296	0.30094	23.4802	10	1.3531	0.590922	4897085	0.000218	1	1	-3.50641	311	三钢闽光	30.36	D	24.71	1.09	0	0	4.56	1		master only (1)
2114	2010	26500000	1210000000	1088000000	-12178861	1332000000	854900000	476600000	罗平锌电	2007-02-15	云南省	曲靖市	罗平县	1	1	C32	有色金属冶炼和压延加工业	-0.0091461	0.64205	21.0096	3	1.11167		6039081	0.0049914	3	0	-3.19659	2184	罗平锌电	11.59	D	7.4	1.26	0	0	2.93	1	200000	matched (3)
2114	2011	26500000	1258000000	1295000000	-282100000	1083000000	888200000	194800000	罗平锌电	2007-02-15	云南省	曲靖市	罗平县	1	1	C32	有色金属冶炼和压延加工业	-0.260473	0.82016	20.803	4	0.971332	0.0396455	2366200	0.0018811	3	0	-3.2103	2649	罗平锌电	-3.87	E	-3.27	0.82	0	0	-1.42	1	0	matched (3)
2114	2012	26500000	1262000000	1114000000	21278709	839300000	625600000	213700000	罗平锌电	2007-02-15	云南省	曲靖市	罗平县	1	1	C32	有色金属冶炼和压延加工业	0.0253543	0.745402	20.548	5	1.13288	0.0034552	13500000	0.0106758	3	0	-3.21281	2786	罗平锌电	-0.26	E	-0.11	1.49	0	0	-1.64	1		master only (1)
2114	2013	610000000	855500000	771800000	-50429811	1770000000	988400000	781600000	罗平锌电	2007-02-15	云南省	曲靖市	罗平县	1	1	C32	有色金属冶炼和压延加工业	-0.0284908	0.558425	21.2943	6	1.10847	-0.322235	4801600	0.0056128	3	0	-3.34678	3000	罗平锌电	3.35	D	2.56	1.12	0	0	-0.33	1		master only (1)
2114	2014	611000000	664700000	482600000	23325350	1561000000	754200000	807100000	罗平锌电	2007-02-15	云南省	曲靖市	罗平县	1	1	C32	有色金属冶炼和压延加工业	0.0149402	0.483068	21.1687	7	1.37744	-0.222995	6304000	0.0094839	3	0	-3.37432	2767	罗平锌电	15.29	D	7.91	2.38	0	0	5	1		master only (1)
2114	2015	623000000	939100000	751400000	17172237	1789000000	961600000	827400000	罗平锌电	2007-02-15	云南省	曲靖市	罗平县	1	1	C32	有色金属冶炼和压延加工业	0.0095987	0.537494	21.3049	8	1.24982	0.412785	10900000	0.0116551	3	0	-3.42777	3031	罗平锌电	13.09	D	6.88	3.2	0	0	3.01	1	100000	matched (3)
2114	2016	623000000	1004000000	793200000	81625552	1892000000	983900000	908300000	罗平锌电	2007-02-15	云南省	曲靖市	罗平县	1	1	C32	有色金属冶炼和压延加工业	0.043138	0.519974	21.361	9	1.26544	0.0688277	1196042	0.0011916	3	0	-3.47285	2930	罗平锌电	15.83	D	10.57	2.43	0	0	2.83	1		master only (1)
2114	2017	979000000	1619000000	1389000000	54712333	2355000000	545200000	1810000000	罗平锌电	2007-02-15	云南省	曲靖市	罗平县	1	1	C32	有色金属冶炼和压延加工业	0.023229	0.231486	21.58	10	1.16543	0.61275	3967382	0.0024509	3	0	-3.53007	2942	罗平锌电	14.99	D	8.17	1.98	0	0	4.84	1		master only (1)
2125	2010	454800	622000000	480400000	46138516	766900000	445100000	321800000	湘潭电化	2007-04-03	湖南省	湘潭市	雨湖区			C26	化学原料及化学制品制造业	0.0601637	0.580354	20.4578	3	1.29491		1577000	0.0025353	2	0	-3.11821	2040	湘潭电化	14.82	D	11.99	0.37	0	0	2.46	1	40000	matched (3)
2125	2011	3250250	756100000	621400000	38219833	1048000000	622600000	425600000	湘潭电化	2007-04-03	湖南省	湘潭市	雨湖区			C26	化学原料及化学制品制造业	0.0364629	0.593942	20.7703	4	1.2169	0.215612	5032425	0.0066554	2	0	-3.20581	2285	湘潭电化	14.03	D	11.23	1.16	0	0	1.64	1	0	matched (3)
2125	2012	3250250	631400000	546200000	-45596722	1250000000	877800000	372600000	湘潭电化	2007-04-03	湖南省	湘潭市	雨湖区			C26	化学原料及化学制品制造业	-0.0364653	0.702003	20.9467	5	1.15586	-0.165001	4270777	0.0067642	2	0	-3.26898	2730	湘潭电化	3.01	D	0.76	1.34	0	0	0.91	1	50076.6	matched (3)
2125	2013	3250250	708100000	617400000	7.58619e+06	1234000000	852400000	381100000	湘潭电化	2007-04-03	湖南省	湘潭市	雨湖区			C26	化学原料及化学制品制造业	0.0061501	0.691014	20.9331	6	1.1468	0.121477	56800000	0.0801726	2	0	-3.30728	2762	湘潭电化	13.25	D	6.02	2.23	0	0	5	1	131677	matched (3)
2125	2014	3250250	669800000	614700000	-60278974	1545000000	1231000000	313900000	湘潭电化	2007-04-03	湖南省	湘潭市	雨湖区			C26	化学原料及化学制品制造业	-0.0390218	0.796821	21.1581	7	1.0897	-0.0539982	12900000	0.019201	2	0	-3.37321	3304	湘潭电化	4.02	D	0.54	4	0	0	-0.52	1	192007	matched (3)
2125	2015	32400000	625500000	479100000	12274292	2632000000	1571000000	1061000000	湘潭电化	2007-04-03	湖南省	湘潭市	雨湖区			C26	化学原料及化学制品制造业	0.0046635	0.596999	21.691	8	1.30574	-0.0661392	5407361	0.0086443	2	0	-3.45723	2672	湘潭电化	16.58	D	7.58	4	0	0	5	1	294117	matched (3)
2125	2016	32500000	657700000	502500000	25735115	2179000000	1092000000	1087000000	湘潭电化	2007-04-03	湖南省	湘潭市	雨湖区			C26	化学原料及化学制品制造业	0.0118132	0.501184	21.5019	9	1.30879	0.051375	12500000	0.0190301	2	0	-3.48441	3089	湘潭电化	14	D	7.64	3.38	0	0	2.98	1	0	matched (3)
2125	2017	32600000	740800000	549700000	51568286	2557000000	1418000000	1139000000	湘潭电化	2007-04-03	湖南省	湘潭市	雨湖区			C26	化学原料及化学制品制造业	0.0201685	0.554594	21.6621	10	1.34772	0.126393	9787873	0.0132125	2	0	-3.53547	3208	湘潭电化	11.14	D	8.81	3.88	0	0	-1.55	1		master only (1)
2128	2011	756000000	6502000000	4025000000	1656000000	8059000000	3185000000	4874000000	露天煤业	2007-04-18	内蒙古自治区	通辽市	霍林郭勒市			B06	煤炭开采和洗选业	0.2055	0.395258	22.8101	4	1.61549	0.146349	1791884	0.0002756	3	0	-3.3102	52	露天煤业	73.83	B	24.74	8.5	15	23	2.59	1		master only (1)
2128	2012	756000000	6870000000	4357000000	1575000000	8988000000	3303000000	5685000000	露天煤业	2007-04-18	内蒙古自治区	通辽市	霍林郭勒市			B06	煤炭开采和洗选业	0.175205	0.367502	22.9191	5	1.57666	0.0565376	1378984	0.0002007	3	0	-3.34571	86	露天煤业	73.36	B	22.94	10.02	15	23	2.4	1	17500	matched (3)
2128	2013	762000000	6221000000	4472000000	913900000	9876000000	3540000000	6336000000	露天煤业	2007-04-18	内蒙古自治区	通辽市	霍林郭勒市			B06	煤炭开采和洗选业	0.0925438	0.358436	23.0133	6	1.39114	-0.0944807	1378984	0.0002217	3	0	-3.381	257	露天煤业	68.62	B	21.26	7.39	12	24	3.97	1	17500	matched (3)
2128	2014	756000000	6254000000	4631000000	622200000	13940000000	5504000000	8432000000	露天煤业	2007-04-18	内蒙古自治区	通辽市	霍林郭勒市			B06	煤炭开采和洗选业	0.0446451	0.394971	23.3577	7	1.35031	0.0052837	1774194	0.0002837	3	0	-3.3973	1627	露天煤业	20.9	D	16.74	1.13	0	0	3.03	1	412710	matched (3)
2128	2015	757000000	5587000000	3961000000	532700000	14080000000	5202000000	8878000000	露天煤业	2007-04-18	内蒙古自治区	通辽市	霍林郭勒市			B06	煤炭开采和洗选业	0.037832	0.369467	23.368	8	1.41037	-0.106691	2169403	0.0003883	3	0	-3.43643	1754	露天煤业	20.9	D	16.64	1.22	0	0	3.04	1	807919	matched (3)
2128	2016	760000000	5501000000	3530000000	826900000	13950000000	4395000000	9556000000	露天煤业	2007-04-18	内蒙古自治区	通辽市	霍林郭勒市			B06	煤炭开采和洗选业	0.059269	0.31503	23.3588	9	1.55818	-0.015369	2036830	0.0003703	3	0	-3.4772	1355	露天煤业	24.65	D	21.14	1.15	0	0	2.36	1	1095346	matched (3)
2128	2017	765000000	7589000000	4294000000	1763000000	14720000000	3858000000	10860000000	露天煤业	2007-04-18	内蒙古自治区	通辽市	霍林郭勒市			B06	煤炭开采和洗选业	0.119768	0.262163	23.4123	10	1.76718	0.379587	2141924	0.0002822	3	0	-3.5126	895	露天煤业	26.4	D	22.5	1.18	0	0	2.72	1	650021	matched (3)
2136	2010	0	550000000	487200000	26770710	412500000	191200000	221300000	安纳达	2007-05-30	安徽省	铜陵市	铜官区			C26	化学原料及化学制品制造业	0.0649025	0.463518	19.8377	3	1.12902		1350611	0.0024556	2	0	-2.99888	1883	安纳达	16.9	D	12.43	1.72	0	0	2.75	1		master only (1)
2136	2011	0	719000000	625300000	56639378	850200000	213400000	636800000	安纳达	2007-05-30	安徽省	铜陵市	铜官区			C26	化学原料及化学制品制造业	0.0666197	0.250997	20.561	4	1.14992	0.307266	845706	0.0011762	2	0	-3.17485	1578	安纳达	20.51	D	16.38	1.42	0	0	2.71	1		master only (1)
2136	2012	0	685500000	623800000	21914727	927300000	290000000	637200000	安纳达	2007-05-30	安徽省	铜陵市	铜官区			C26	化学原料及化学制品制造业	0.0236341	0.312798	20.6477	5	1.09891	-0.0466068	2350930	0.0034294	2	0	-3.22814	2543	安纳达	11.81	D	8.39	0.76	0	0	2.66	1		master only (1)
2136	2013	3600000	495600000	476300000	-45879803	1071000000	475700000	594900000	安纳达	2007-05-30	安徽省	铜陵市	铜官区			C26	化学原料及化学制品制造业	-0.0428517	0.444338	20.7916	6	1.04057	-0.27698	2925863	0.0059032	2	0	-3.28874	2969	安纳达	5.62	D	1.6	1.33	0	0	2.69	1		master only (1)
2136	2014	3600000	765000000	705900000	3.19122e+06	1046000000	447600000	598100000	安纳达	2007-05-30	安徽省	铜陵市	铜官区			C26	化学原料及化学制品制造业	0.0030517	0.428029	20.768	7	1.08372	0.543406	9677977	0.0126514	2	0	-3.32549	3159	安纳达	10.2	D	6.25	1.14	0	0	2.81	1		master only (1)
2136	2015	3600000	606500000	592900000	-133300000	950900000	486100000	464800000	安纳达	2007-05-30	安徽省	铜陵市	铜官区			C26	化学原料及化学制品制造业	-0.14019	0.511169	20.6729	8	1.02296	-0.207181	2874064	0.0047389	2	0	-3.35187	3531	安纳达	-2.01	E	-2.9	1.03	0	0	-0.14	1		master only (1)
2136	2016	3600000	819100000	694100000	44998528	968700000	449900000	518800000	安纳达	2007-05-30	安徽省	铜陵市	铜官区			C26	化学原料及化学制品制造业	0.0464501	0.464449	20.6915	9	1.18012	0.350539	3510634	0.004286	2	0	-3.3946	3247	安纳达	11.49	D	9.68	1.26	0	0	0.55	1		master only (1)
2136	2017	3600000	1143000000	882400000	169500000	990200000	301900000	688300000	安纳达	2007-05-30	安徽省	铜陵市	铜官区			C26	化学原料及化学制品制造业	0.171186	0.304874	20.7134	10	1.295	0.395065	5633184	0.0049298	2	0	-3.43777	1810	安纳达	21.92	D	19.43	1.88	0	0	0.61	1		master only (1)
2144	2010	17000000	409500000	318900000	40269821	1492000000	357000000	1135000000	宏达高科	2007-08-03	浙江省	嘉兴市	海宁市			C17	纺织业	0.026986	0.23922	21.1236	3	1.28416		4401901	0.0107503	1	1	-3.20951	1860	宏达高科	17.07	D	12	0.8	0	0	4.27	0		master only (1)
2144	2011	18600000	587800000	424500000	70485795	1458000000	355700000	1102000000	宏达高科	2007-08-03	浙江省	嘉兴市	海宁市			C17	纺织业	0.0483483	0.243966	21.1002	4	1.38461	0.43548	3491269	0.0059397	1	1	-3.24695	1162	宏达高科	23.73	D	18.65	0.59	0	0	4.49	0		master only (1)
2144	2012	24800000	628700000	415400000	115100000	1535000000	278300000	1256000000	宏达高科	2007-08-03	浙江省	嘉兴市	海宁市			C17	纺织业	0.0749966	0.181328	21.1516	5	1.51337	0.0696419	19600000	0.0312478	1	1	-3.29251	111	宏达高科	71.48	B	22.69	8.13	20	15	5.66	0		master only (1)
2144	2013	30700000	585900000	397000000	81213304	2179000000	318700000	1861000000	宏达高科	2007-08-03	浙江省	嘉兴市	海宁市			C17	纺织业	0.0372636	0.146251	21.5023	6	1.47591	-0.0681455	7363928	0.0125692	1	1	-3.36444	408	宏达高科	62.65	B	22.69	6.41	18	11	4.55	0		master only (1)
2144	2014	44200000	545100000	389800000	117400000	2191000000	471400000	1720000000	宏达高科	2007-08-03	浙江省	嘉兴市	海宁市			C17	纺织业	0.053586	0.215098	21.5078	7	1.39848	-0.0695663	5146673	0.0094414	1	1	-3.40485	623	宏达高科	26.71	D	20.07	1.65	0	0	4.99	0		master only (1)
2144	2015	51700000	526600000	386600000	124800000	2071000000	366000000	1705000000	宏达高科	2007-08-03	浙江省	嘉兴市	海宁市			C17	纺织业	0.0602347	0.176711	21.4514	8	1.3621	-0.033876	7096822	0.0134754	1	1	-3.44046	854	宏达高科	25.97	D	18.51	1.59	0	0	5.87	0		master only (1)
2144	2016	56300000	569700000	398300000	100400000	2055000000	356500000	1698000000	宏达高科	2007-08-03	浙江省	嘉兴市	海宁市			C17	纺织业	0.0488851	0.173494	21.4434	9	1.43016	0.0817307	15100000	0.026576	1	1	-3.47981	386	宏达高科	57.36	C	17.91	6.56	18	13	1.89	0		master only (1)
2144	2017	66300000	634800000	441800000	94818613	2025000000	337400000	1688000000	宏达高科	2007-08-03	浙江省	嘉兴市	海宁市			C17	纺织业	0.0468133	0.16658	21.4291	10	1.43683	0.114207	10100000	0.0158418	1	1	-3.51864	1552	宏达高科	23.24	D	17.49	1.52	0	0	4.23	0		master only (1)
2145	2010	3227430	350400000	366800000	10965934	616000000	326000000	290000000	中核钛白	2007-08-03	甘肃省	嘉峪关市	嘉峪关市			C26	化学原料及化学制品制造业	0.0178013	0.529276	20.2388	3	0.955376		907829	0.0025909	3	0	-3.07984	2279	中核钛白	7.07	D	6.09	0.81	0	0	0.17	1	375270	matched (3)
2145	2011	3227430	418900000	421900000	-197700000	578100000	485800000	92253993	中核钛白	2007-08-03	甘肃省	嘉峪关市	嘉峪关市			C26	化学原料及化学制品制造业	-0.342034	0.840411	20.1752	4	0.992978	0.195628	190886	0.0004556	3	0	-3.10793	2637	中核钛白	-2.7	E	-3.84	1.15	0	0	-0.01	1	0	matched (3)
2145	2012	0	440200000	415300000	4.90528e+06	520700000	345100000	175600000	中核钛白	2007-08-03	甘肃省	嘉峪关市	嘉峪关市			C26	化学原料及化学制品制造业	0.0094204	0.662738	20.0707	5	1.06003	0.0508324	961578	0.0021842	3	0	-3.1276	2602	中核钛白	9.82	D	3.51	1.31	0	0	5	0		master only (1)
2145	2013	260359	1585000000	1225000000	17408325	3005000000	1816000000	1190000000	中核钛白	2007-08-03	甘肃省	嘉峪关市	嘉峪关市			C26	化学原料及化学制品制造业	0.0057926	0.604181	21.8236	6	1.29404	2.60098	10600000	0.0066609	3	0	-3.3844	2775	中核钛白	12.94	D	7.17	0.77	0	0	5	0		master only (1)
2145	2014	596694	1734000000	1301000000	34554101	3885000000	2301000000	1584000000	中核钛白	2007-08-03	甘肃省	嘉峪关市	嘉峪关市			C26	化学原料及化学制品制造业	0.008894	0.592381	22.0804	7	1.33276	0.0940784	1916479	0.001105	3	0	-3.43396	2965	中核钛白	13.4	D	7.63	0.77	0	0	5	0	38048	matched (3)
2145	2015	3154326	1629000000	1289000000	-126400000	4791000000	2433000000	2357000000	中核钛白	2007-08-03	甘肃省	嘉峪关市	嘉峪关市			C26	化学原料及化学制品制造业	-0.0263768	0.507919	22.29	8	1.26437	-0.0605456	13800000	0.0084921	3	0	-3.47757	3368	中核钛白	2.22	D	3.07	0.95	0	0	-1.8	0	0	matched (3)
2145	2016	3612512	2048000000	1536000000	84090715	5226000000	2662000000	2564000000	中核钛白	2007-08-03	甘肃省	嘉峪关市	嘉峪关市			C26	化学原料及化学制品制造业	0.016091	0.509407	22.3769	9	1.33355	0.257003	21400000	0.0104367	3	0	-3.51796	228	中核钛白	64.19	B	9.33	12.24	15	23	4.62	0	2033100	matched (3)
2145	2017	3650448	3256000000	2183000000	388500000	5699000000	2702000000	2997000000	中核钛白	2007-08-03	甘肃省	嘉峪关市	嘉峪关市			C26	化学原料及化学制品制造业	0.0681774	0.474157	22.4636	10	1.49152	0.589913	14000000	0.0042957	3	0	-3.5577	13	中核钛白	57.31	C	16.22	12.48	9	17	2.61	0	123000	matched (3)
2149	2010	74200000	1253000000	1063000000	67068457	2423000000	1379000000	1045000000	西部材料	2007-08-10	陕西省	西安市	高陵区			C32	有色金属冶炼和压延加工业	0.0276756	0.568874	21.6084	3	1.17926		16400000	0.0131222	3	0	-3.25201	1920	西部材料	16.47	D	11.12	2.44	0	0	2.91	1		master only (1)
2149	2011	88700000	1494000000	1269000000	6.1685e+06	2729000000	1733000000	996200000	西部材料	2007-08-10	陕西省	西安市	高陵区			C32	有色金属冶炼和压延加工业	0.00226	0.635031	21.7274	4	1.17727	0.192153	13500000	0.0090308	3	0	-3.29935	2494	西部材料	6.82	D	6.02	3.21	0	0	-2.41	1		master only (1)
2149	2012	120000000	1404000000	1179000000	54470290	2622000000	1583000000	1039000000	西部材料	2007-08-10	陕西省	西安市	高陵区			C32	有色金属冶炼和压延加工业	0.020778	0.603796	21.687	5	1.19145	-0.0601337	61000000	0.0434071	3	0	-3.33699	2409	西部材料	14.65	D	10.14	3.13	0	0	1.38	1	146667	matched (3)
2149	2013	147000000	1145000000	949900000	51896008	2783000000	1727000000	1056000000	西部材料	2007-08-10	陕西省	西安市	高陵区			C32	有色金属冶炼和压延加工业	0.0186485	0.620649	21.7467	6	1.20515	-0.184875	34200000	0.0298612	3	0	-3.38043	2531	西部材料	15.91	D	8.35	3.9	0	0	3.66	1	1453333	matched (3)
2149	2014	191000000	1225000000	992500000	39119558	2897000000	1817000000	1080000000	西部材料	2007-08-10	陕西省	西安市	高陵区			C32	有色金属冶炼和压延加工业	0.0135041	0.62709	21.7869	7	1.23395	0.0697556	37400000	0.0305125	3	0	-3.42256	3119	西部材料	11.42	D	7.41	3.28	0	0	0.73	1	0	matched (3)
2149	2015	253000000	983100000	925200000	-175100000	2867000000	1882000000	984300000	西部材料	2007-08-10	陕西省	西安市	高陵区			C32	有色金属冶炼和压延加工业	-0.0610785	0.656657	21.7764	8	1.06253	-0.197286	40300000	0.0410353	3	0	-3.46202	3298	西部材料	4.5	D	-1.49	3.58	0	0	2.41	1		master only (1)
2149	2016	303000000	1213000000	982200000	40897519	3328000000	1397000000	1930000000	西部材料	2007-08-10	陕西省	西安市	高陵区			C32	有色金属冶炼和压延加工业	0.0122899	0.419957	21.9256	9	1.23532	0.234249	86800000	0.0715459	3	0	-3.50887	3248	西部材料	11.49	D	6.81	4	0	0	0.68	1		master only (1)
2149	2017	344000000	1559000000	1249000000	91449703	3569000000	1526000000	2042000000	西部材料	2007-08-10	陕西省	西安市	高陵区			C32	有色金属冶炼和压延加工业	0.0256255	0.427696	21.9955	10	1.24865	0.284959	53600000	0.0343678	3	0	-3.55143	2157	西部材料	20.22	D	13.31	3.67	0	0	3.24	1		master only (1)
2155	2010	445000000	2879000000	1922000000	191100000	3139000000	1094000000	2046000000	湖南黄金	2007-08-16	湖南省	长沙市	雨花区			B09	有色金属矿采选业	0.0608868	0.348367	21.8672	3	1.4984		6574501	0.0022832	2	0	-3.26642	160	湖南黄金	59.58	C	14.84	11.74	13	15	5	1		master only (1)
2155	2011	478000000	4081000000	2754000000	540200000	3674000000	1171000000	2502000000	湖南黄金	2007-08-16	湖南省	长沙市	雨花区			B09	有色金属矿采选业	0.147047	0.318846	22.0245	4	1.48207	0.417407	12100000	0.0029664	2	0	-3.31236	238	湖南黄金	62.92	B	12.63	11.64	15	20	3.65	1		master only (1)
2155	2012	484000000	4729000000	3428000000	535400000	4367000000	1410000000	2958000000	湖南黄金	2007-08-16	湖南省	长沙市	雨花区			B09	有色金属矿采选业	0.1226	0.322738	22.1974	5	1.37967	0.158688	16000000	0.0033793	2	0	-3.35644	17	湖南黄金	82.58	A	20.93	12.5	14	30	5.15	1		master only (1)
2155	2013	491000000	5121000000	4175000000	189600000	4452000000	1325000000	3127000000	湖南黄金	2007-08-16	湖南省	长沙市	雨花区			B09	有色金属矿采选业	0.0425835	0.297587	22.2166	6	1.22639	0.0827908	33300000	0.0065029	2	0	-3.39674	340	湖南黄金	65.5	B	14.72	12.5	12	23	3.28	1		master only (1)
2155	2014	550000000	5681000000	4816000000	120100000	4903000000	1686000000	3217000000	湖南黄金	2007-08-16	湖南省	长沙市	雨花区			B09	有色金属矿采选业	0.0244936	0.343893	22.3131	7	1.17963	0.109363	12100000	0.0021377	2	0	-3.43773	91	湖南黄金	59.57	C	9.76	15	12	17	5.81	1		master only (1)
2155	2015	735000000	5792000000	5018000000	18652221	5745000000	2321000000	3424000000	湖南黄金	2007-08-16	湖南省	长沙市	雨花区			B09	有色金属矿采选业	0.0032469	0.404012	22.4715	8	1.15435	0.019681	29800000	0.0051479	2	0	-3.47764	85	湖南黄金	69.1	B	8.16	15	15	27	3.94	1		master only (1)
2155	2016	760000000	6781000000	5712000000	123000000	6490000000	2125000000	4364000000	湖南黄金	2007-08-16	湖南省	长沙市	雨花区			B09	有色金属矿采选业	0.0189504	0.327508	22.5935	9	1.18708	0.17069	5731713	0.0008452	2	0	-3.5161	109	湖南黄金	69.62	B	11.53	13	15	24	6.09	1		master only (1)
2155	2017	866000000	10330000000	9061000000	293300000	6886000000	2250000000	4636000000	湖南黄金	2007-08-16	湖南省	长沙市	雨花区			B09	有色金属矿采选业	0.0425872	0.326739	22.6528	10	1.13956	0.522717	7201669	0.0006974	2	0	-3.55488	2613	湖南黄金	17.68	D	10.25	4	0	0	3.43	1	402238	matched (3)
2160	2010	1100000	1949000000	1755000000	44817522	1518000000	856800000	660800000	常铝股份	2007-08-21	江苏省	苏州市	常熟市			C32	有色金属冶炼和压延加工业	0.0295319	0.564569	21.1404	3	1.11068		1442353	0.0007399	1	1	-3.21132	2118	常铝股份	13.77	D	11.17	0.63	0	0	1.97	0		master only (1)
2160	2011	1100000	2054000000	1846000000	5.96951e+06	1768000000	1109000000	658100000	常铝股份	2007-08-21	江苏省	苏州市	常熟市			C32	有色金属冶炼和压延加工业	0.0033773	0.62769	21.2929	4	1.11235	0.0534682	6581567	0.0032049	1	1	-3.26664	2436	常铝股份	10.32	D	7.66	0.43	0	0	2.23	0		master only (1)
2160	2012	1274684	1914000000	1790000000	-69254917	2052000000	1465000000	586900000	常铝股份	2007-08-21	江苏省	苏州市	常熟市			C32	有色金属冶炼和压延加工业	-0.0337564	0.713908	21.4419	5	1.06966	-0.0677706	3030067	0.0015828	1	1	-3.31969	2724	常铝股份	3.34	D	2.87	0.39	0	0	0.08	0		master only (1)
2160	2013	1274684	1837000000	1686000000	-59209127	2247000000	1719000000	527800000	常铝股份	2007-08-21	江苏省	苏州市	常熟市			C32	有色金属冶炼和压延加工业	-0.0263542	0.765066	21.5327	6	1.08931	-0.0404617	1490567	0.0008114	1	1	-3.3667	3001	常铝股份	3.35	D	3.24	0	0	0	0.11	0		master only (1)
2160	2014	11100000	2164000000	1861000000	21397299	2852000000	1950000000	901800000	常铝股份	2007-08-21	江苏省	苏州市	常熟市			C32	有色金属冶炼和压延加工业	0.0075026	0.683788	21.7713	7	1.16282	0.177987	5469562	0.0025277	1	1	-3.42175	3115	常铝股份	11.46	D	7.09	1.55	0	0	2.82	0	5000	matched (3)
2160	2015	13500000	2538000000	2005000000	118400000	4712000000	2353000000	2359000000	常铝股份	2007-08-21	江苏省	苏州市	常熟市			C32	有色金属冶炼和压延加工业	0.0251329	0.499312	22.2733	8	1.26597	0.172777	7350097	0.0028963	1	1	-3.47742	2792	常铝股份	15.67	D	12.5	1.38	0	0	1.79	0	0	matched (3)
2160	2016	29400000	3285000000	2632000000	156100000	5704000000	2518000000	3185000000	常铝股份	2007-08-21	江苏省	苏州市	常熟市			C32	有色金属冶炼和压延加工业	0.0273688	0.44153	22.4644	9	1.24843	0.294596	3931423	0.0011966	1	1	-3.51769	2520	常铝股份	18.49	D	15.08	1.26	0	0	2.15	0		master only (1)
2160	2017	29400000	4064000000	3322000000	170300000	6526000000	3243000000	3282000000	常铝股份	2007-08-21	江苏省	苏州市	常熟市			C32	有色金属冶炼和压延加工业	0.0260923	0.49702	22.599	10	1.22341	0.236954	14000000	0.0034374	1	1	-3.55599	2569	常铝股份	17.98	D	15.92	1.51	0	0	0.55	0		master only (1)
2162	2010	1046707	1002000000	703000000	33518377	1843000000	944900000	897700000	悦心健康	2007-08-23	上海市	上海市	闵行区	1	3	C30	非金属矿物制品业	0.0181902	0.512812	21.3345	3	1.4248		39500000	0.0394709	1	1	-3.23048	488	悦心健康	44.2	C	10.04	4.59	12	10	7.57	0		master only (1)
2162	2011	1446557	910400000	709900000	-181600000	1907000000	1211000000	695500000	悦心健康	2007-08-23	上海市	上海市	闵行区	1	3	C30	非金属矿物制品业	-0.095244	0.635235	21.3687	4	1.28256	-0.0911004	10200000	0.0111627	1	1	-3.27352	569	悦心健康	39.79	D	-1.15	6.14	19	9	6.8	0		master only (1)
2162	2012	1414977	884500000	635200000	-207200000	1863000000	1346000000	517600000	悦心健康	2007-08-23	上海市	上海市	闵行区	1	3	C30	非金属矿物制品业	-0.111196	0.722203	21.3457	5	1.39263	-0.0284346	31300000	0.0353735	1	1	-3.31148	630	悦心健康	38.72	D	0.23	8.5	19	15	-4.01	0		master only (1)
2162	2013	1414977	893400000	635300000	21465177	2087000000	1479000000	607900000	悦心健康	2007-08-23	上海市	上海市	闵行区	1	3	C30	非金属矿物制品业	0.0102873	0.708641	21.4588	6	1.4064	0.0100434	55200000	0.061796	1	1	-3.36105	341	悦心健康	65.5	B	8.49	7.01	19	15	16	0		master only (1)
2162	2014	6836498	845400000	584800000	14218536	2225000000	1411000000	813600000	悦心健康	2007-08-23	上海市	上海市	闵行区	1	3	C30	非金属矿物制品业	0.0063908	0.634306	21.523	7	1.44559	-0.0537627	12000000	0.0142506	1	1	-3.40598	115	悦心健康	55.39	C	9.84	6.55	18	11	10	0		master only (1)
2162	2015	6857695	684200000	460800000	14296042	2144000000	1327000000	816700000	悦心健康	2007-08-23	上海市	上海市	闵行区	1	3	C30	非金属矿物制品业	0.0066691	0.619012	21.4858	8	1.48497	-0.19067	1892113	0.0027654	1	1	-3.44317	2291	悦心健康	18.44	D	7.06	1.38	0	0	10	0		master only (1)
2162	2016	6857695	777900000	505200000	15799857	2059000000	1208000000	850800000	悦心健康	2007-08-23	上海市	上海市	闵行区	1	3	C30	非金属矿物制品业	0.0076732	0.586804	21.4455	9	1.53979	0.136928	7392872	0.0095038	1	1	-3.47999	400	悦心健康	56.72	C	7.67	8.43	18	13	9.62	0		master only (1)
2162	2017	8557695	900200000	588700000	17865478	2115000000	1229000000	885800000	悦心健康	2007-08-23	上海市	上海市	闵行区	1	3	C30	非金属矿物制品业	0.0084463	0.581206	21.4724	10	1.5293	0.15726	5416400	0.0060168	1	1	-3.52213	2375	悦心健康	19.15	D	7.22	2.05	0	0	9.88	0		master only (1)
2165	2010	0	1387000000	1159000000	98243151	1145000000	532700000	612700000	红宝丽	2007-09-13	江苏省	南京市	高淳区	2	2	C26	化学原料及化学制品制造业	0.0857709	0.465103	20.859	3	1.19675		6334370	0.0045668	1	1	-3.17779	280	红宝丽	55.55	C	14.8	9.24	9	17	5.51	0	500000	matched (3)
2165	2011	0	1699000000	1467000000	82613995	1537000000	613700000	923200000	红宝丽	2007-09-13	江苏省	南京市	高淳区	2	2	C26	化学原料及化学制品制造业	0.0537526	0.399305	21.1531	4	1.15841	0.225236	24600000	0.0144624	1	1	-3.25267	405	红宝丽	54.3	C	14.13	12.76	10	14	3.41	0		master only (1)
2165	2012	0	1655000000	1383000000	84475351	1762000000	763700000	998000000	红宝丽	2007-09-13	江苏省	南京市	高淳区	2	2	C26	化学原料及化学制品制造业	0.047951	0.433498	21.2895	5	1.19676	-0.026204	12500000	0.0075302	1	1	-3.30633	119	红宝丽	71.16	B	17.04	11	15	23	5.12	0	340000	matched (3)
2165	2013	0	1916000000	1616000000	45176814	1834000000	840200000	993800000	红宝丽	2007-09-13	江苏省	南京市	高淳区	2	2	C26	化学原料及化学制品制造业	0.0246327	0.458104	21.3298	6	1.18573	0.157848	7251020	0.0037841	1	1	-3.35005	358	红宝丽	64.76	B	16.56	12.02	15	17	4.18	0	0	matched (3)
2165	2014	0	2130000000	1758000000	100100000	1785000000	749200000	1036000000	红宝丽	2007-09-13	江苏省	南京市	高淳区	2	2	C26	化学原料及化学制品制造业	0.0560462	0.419675	21.3028	7	1.21213	0.111801	4204574	0.0019736	1	1	-3.38757	876	红宝丽	24.91	D	16.96	3.83	0	0	4.12	0	258000	matched (3)
2165	2015	0	1827000000	1457000000	108800000	1792000000	699100000	1093000000	红宝丽	2007-09-13	江苏省	南京市	高淳区	2	2	C26	化学原料及化学制品制造业	0.0606717	0.390035	21.3069	8	1.2547	-0.14219	8223478	0.0044999	1	1	-3.42795	1980	红宝丽	19.72	D	11.3	3.59	0	0	4.83	0	0	matched (3)
2165	2016	0	1834000000	1485000000	135200000	2498000000	909300000	1589000000	红宝丽	2007-09-13	江苏省	南京市	高淳区	2	2	C26	化学原料及化学制品制造业	0.0541293	0.36394	21.639	9	1.23509	0.0034808	7372560	0.0040203	1	1	-3.49401	66	红宝丽	72.7	B	16.59	14.33	15	23	3.78	0		master only (1)
2165	2017	1950136	2171000000	1855000000	47628121	2932000000	1342000000	1589000000	红宝丽	2007-09-13	江苏省	南京市	高淳区	2	2	C26	化学原料及化学制品制造业	0.0162456	0.457836	21.7989	10	1.1707	0.183993	11900000	0.0054897	1	1	-3.54317	2468	红宝丽	18.6	D	12.8	2.58	0	0	3.22	0	3915242	matched (3)
2167	2010	29600000	370400000	270400000	45551152	1359000000	759500000	599900000	东方锆业	2007-09-13	广东省	汕头市	澄海区			C32	有色金属冶炼和压延加工业	0.033509	0.558689	21.0303	3	1.36972		6824497	0.0184233	1	1	-3.19901	1948	东方锆业	16.13	D	12.72	1.01	0	0	2.4	0	0	matched (3)
2167	2011	73400000	549500000	344800000	88421473	2229000000	698700000	1530000000	东方锆业	2007-09-13	广东省	汕头市	澄海区			C32	有色金属冶炼和压延加工业	0.0396716	0.313469	21.5247	4	1.59373	0.483513	8104485	0.0147479	1	1	-3.28612	2391	东方锆业	11.8	D	7.03	1.48	0	0	3.29	0	150000	matched (3)
2167	2012	181000000	557800000	443900000	6.79639e+06	3043000000	1493000000	1550000000	东方锆业	2007-09-13	广东省	汕头市	澄海区			C32	有色金属冶炼和压延加工业	0.0022338	0.490695	21.836	5	1.25645	0.0150034	5300315	0.0095025	1	1	-3.34498	2426	东方锆业	14.39	D	7.89	1.5	0	0	5	0	200000	matched (3)
2167	2013	189000000	578200000	504600000	-100700000	3071000000	1679000000	1391000000	东方锆业	2007-09-13	广东省	汕头市	澄海区			C32	有色金属冶炼和压延加工业	-0.0327897	0.546931	21.8452	6	1.14594	0.0366449	33300000	0.0576327	1	1	-3.38542	3125	东方锆业	-4.55	E	-5.72	1.4	0	0	-0.23	1	0	matched (3)
2167	2014	193000000	844500000	653100000	5.92256e+06	2957000000	1587000000	1370000000	东方锆业	2007-09-13	广东省	汕头市	澄海区			C32	有色金属冶炼和压延加工业	0.0020032	0.536617	21.8073	7	1.29304	0.460511	36800000	0.0435463	1	1	-3.42359	3154	东方锆业	10.37	D	5.91	1.61	0	0	2.85	1		master only (1)
2167	2015	176000000	564800000	467800000	-358500000	2710000000	1706000000	1004000000	东方锆业	2007-09-13	广东省	汕头市	澄海区			C32	有色金属冶炼和压延加工业	-0.132299	0.629436	21.7202	8	1.20751	-0.331165	10000000	0.0177807	1	1	-3.45894	3477	东方锆业	-0.22	E	-2.13	1.8	0	0	0.11	1		master only (1)
2167	2016	187000000	826900000	600400000	26580785	2702000000	1666000000	1036000000	东方锆业	2007-09-13	广东省	汕头市	澄海区			C32	有色金属冶炼和压延加工业	0.0098358	0.616608	21.7174	9	1.37718	0.463988	8340313	0.0100862	1	1	-3.49878	3451	东方锆业	2.12	D	-0.61	1.46	0	0	1.27	1		master only (1)
2167	2017	191000000	851800000	658700000	-38361745	2974000000	1976000000	998700000	东方锆业	2007-09-13	广东省	汕头市	澄海区			C32	有色金属冶炼和压延加工业	-0.012897	0.664229	21.8133	10	1.29307	0.030057	1986666	0.0023324	1	1	-3.54389	3319	东方锆业	6.82	D	4.52	1.68	0	0	0.62	1		master only (1)
2170	2010	2915405	1543000000	1276000000	107100000	799500000	125700000	673800000	芭田股份	2007-09-19	广东省	深圳市	南山区			C26	化学原料及化学制品制造业	0.133954	0.15719	20.4995	3	1.20983		5532500	0.0035852	1	1	-3.12504	1607	芭田股份	19.14	D	15.25	1.03	0	0	2.86	0		master only (1)
2170	2011	2915405	2324000000	2000000000	65819827	1109000000	341000000	768300000	芭田股份	2007-09-19	广东省	深圳市	南山区			C26	化学原料及化学制品制造业	0.0593319	0.307387	20.827	4	1.16175	0.505842	6440700	0.0027717	1	1	-3.21355	2150	芭田股份	16.08	D	9.86	1.26	0	0	4.96	0		master only (1)
2170	2012	3274094	2167000000	1888000000	91448113	1858000000	468500000	1389000000	芭田股份	2007-09-19	广东省	深圳市	南山区			C26	化学原料及化学制品制造业	0.0492255	0.252168	21.3426	5	1.14785	-0.0673783	7522000	0.0034708	1	1	-3.31121	1722	芭田股份	20.54	D	17.25	1.66	0	0	1.63	0		master only (1)
2170	2013	8061406	2133000000	1774000000	136700000	2490000000	1025000000	1466000000	芭田股份	2007-09-19	广东省	深圳市	南山区			C26	化学原料及化学制品制造业	0.054883	0.411467	21.6356	6	1.20218	-0.0159853	7277467	0.0034126	1	1	-3.37379	429	芭田股份	61.74	B	19.14	10.08	12	17	3.52	0		master only (1)
2170	2014	8679961	2361000000	1864000000	187400000	3133000000	1532000000	1601000000	芭田股份	2007-09-19	广东省	深圳市	南山区			C26	化学原料及化学制品制造业	0.0598102	0.488893	21.8654	7	1.26682	0.107222	5291305	0.0022409	1	1	-3.42634	2862	芭田股份	14.52	D	11.46	1.22	0	0	1.84	0		master only (1)
2170	2015	8997061	2170000000	1705000000	158300000	3919000000	1984000000	1924000000	芭田股份	2007-09-19	广东省	深圳市	南山区			C26	化学原料及化学制品制造业	0.0403939	0.50629	22.0892	8	1.2725	-0.0809841	9468242	0.0043633	1	1	-3.47419	2056	芭田股份	19.44	D	17.18	0.97	0	0	1.29	0		master only (1)
2170	2016	15200000	2001000000	1575000000	51174633	4196000000	2113000000	2066000000	芭田股份	2007-09-19	广东省	深圳市	南山区			C26	化学原料及化学制品制造业	0.0121957	0.503462	22.1574	9	1.27052	-0.0779901	15500000	0.0077567	1	1	-3.51573	345	芭田股份	59.18	C	13.91	11.78	15	20	-1.51	0		master only (1)
2170	2017	14400000	2079000000	1773000000	-112600000	4604000000	2687000000	1917000000	芭田股份	2007-09-19	广东省	深圳市	南山区			C26	化学原料及化学制品制造业	-0.0244579	0.583592	22.2502	10	1.17313	0.0392948	12000000	0.0057946	1	1	-3.55717	3387	芭田股份	3.42	D	4.22	0.92	0	0	-1.72	0	300000	matched (3)
2171	2010	81421.4	2938000000	2777000000	87510015	1104000000	410200000	694100000	楚江新材	2007-09-21	安徽省	芜湖市	鸠江区			C32	有色金属冶炼和压延加工业	0.0792423	0.371468	20.8225	3	1.05767		49900000	0.0169848	2	0	-3.17294	2215	楚江新材	10.39	D	5.54	2.17	0	0	2.68	0		master only (1)
2171	2011	381567	3223000000	3125000000	26681146	1233000000	539800000	692700000	楚江新材	2007-09-21	安徽省	芜湖市	鸠江区			C32	有色金属冶炼和压延加工业	0.0216477	0.437991	20.9323	4	1.03128	0.0970527	66300000	0.0205631	2	0	-3.22718	2169	楚江新材	15.82	D	9.77	2.07	0	0	3.98	0		master only (1)
2171	2012	473191	3205000000	3152000000	-58393566	1385000000	757600000	627800000	楚江新材	2007-09-21	安徽省	芜湖市	鸠江区			C32	有色金属冶炼和压延加工业	-0.0421496	0.546862	21.0493	5	1.01685	-0.0054452	33400000	0.0104171	2	0	-3.2812	2616	楚江新材	9.11	D	3.26	3.1	0	0	2.75	0		master only (1)
2171	2013	357221	3846000000	3693000000	14205534	1345000000	708100000	637100000	楚江新材	2007-09-21	安徽省	芜湖市	鸠江区			C32	有色金属冶炼和压延加工业	0.0105605	0.526397	21.0198	6	1.04166	0.20003	43500000	0.0113214	2	0	-3.31778	2940	楚江新材	7.13	D	7.43	3.34	0	0	-3.64	0		master only (1)
2171	2014	521914	8223000000	7856000000	55945935	2109000000	970600000	1139000000	楚江新材	2007-09-21	安徽省	芜湖市	鸠江区			C32	有色金属冶炼和压延加工业	0.0265238	0.460157	21.4696	7	1.04661	1.13777	16000000	0.0019518	2	0	-3.40191	1802	楚江新材	20	D	12.23	2.77	0	0	5	0		master only (1)
2171	2015	27900000	8011000000	7679000000	75879689	2837000000	1127000000	1710000000	楚江新材	2007-09-21	安徽省	芜湖市	鸠江区			C32	有色金属冶炼和压延加工业	0.026746	0.397261	21.766	8	1.0432	-0.0257119	39600000	0.0049375	2	0	-3.46147	2813	楚江新材	15.5	D	9.9	2.04	0	0	3.56	0		master only (1)
2171	2016	30400000	7918000000	7392000000	190300000	4335000000	1155000000	3180000000	楚江新材	2007-09-21	安徽省	芜湖市	鸠江区			C32	有色金属冶炼和压延加工业	0.0439073	0.266338	22.1899	9	1.07128	-0.0115782	38100000	0.0048166	2	0	-3.51632	1842	楚江新材	21.97	D	16.87	2.11	0	0	2.99	0		master only (1)
2171	2017	36100000	11040000000	10390000000	360600000	4734000000	1300000000	3434000000	楚江新材	2007-09-21	安徽省	芜湖市	鸠江区			C32	有色金属冶炼和压延加工业	0.0761714	0.274682	22.2781	10	1.06257	0.394717	150000000	0.0136005	2	0	-3.55747	1470	楚江新材	23.64	D	18.51	1.92	0	0	3.21	0		master only (1)
2172	2010	830000	3805000000	3352000000	123000000	4079000000	2339000000	1740000000	澳洋健康	2007-09-21	江苏省	苏州市	张家港市			C28	化学纤维制造业	0.0301485	0.573416	22.129	3	1.13512		13400000	0.0035153	1	1	-3.27514	388	澳洋科技	51.04	C	11.64	6.99	8	23	1.41	0		master only (1)
2172	2011	830000	3824000000	3934000000	-812200000	3621000000	2888000000	733000000	澳洋健康	2007-09-21	江苏省	苏州市	张家港市			C28	化学纤维制造业	-0.224314	0.797557	22.0099	4	0.971977	0.0049205	10100000	0.002631	1	1	-3.3119	1204	澳洋科技	23.42	D	-2.05	9.76	5	11	-0.29	0		master only (1)
2172	2012	1539402	3552000000	3307000000	41913722	2948000000	2163000000	785500000	澳洋健康	2007-09-21	江苏省	苏州市	张家港市			C28	化学纤维制造业	0.0142163	0.733578	21.8045	5	1.07418	-0.0710334	125000000	0.0353261	1	1	-3.34346	613	澳洋科技	43.58	C	7.63	7.95	5	23	0	0		master only (1)
2172	2013	1777100	3277000000	2894000000	22552488	2856000000	2021000000	834900000	澳洋健康	2007-09-21	江苏省	苏州市	张家港市			C28	化学纤维制造业	0.0078962	0.707686	21.7727	6	1.1325	-0.0773913	24600000	0.0074948	1	1	-3.38183	2919	澳洋科技	8.2	D	6.47	1.81	0	0	-0.08	0		master only (1)
2172	2014	1919553	2931000000	2717000000	-131700000	2392000000	1713000000	679100000	澳洋健康	2007-09-21	江苏省	苏州市	张家港市			C28	化学纤维制造业	-0.055059	0.716061	21.5953	7	1.0788	-0.105654	8151041	0.0027808	1	1	-3.41113	3318	澳洋科技	3.44	D	1.62	1.82	0	0	0	0		master only (1)
2172	2015	11900000	3809000000	3284000000	106800000	3676000000	2495000000	1180000000	澳洋健康	2007-09-21	江苏省	苏州市	张家港市			C28	化学纤维制造业	0.0290425	0.678906	22.025	8	1.15975	0.299408	52400000	0.0137544	1	1	-3.47238	174	澳洋科技	61.4	B	10.68	11.19	15	23	1.53	0	435000	matched (3)
2172	2016	12100000	4876000000	4238000000	273400000	4123000000	2786000000	1337000000	澳洋健康	2007-09-21	江苏省	苏州市	张家港市			C28	化学纤维制造业	0.0663243	0.675708	22.1397	9	1.15053	0.280153	52200000	0.0107073	1	1	-3.51537	397	澳洋科技	56.75	C	12.66	10.81	12	20	1.28	0	534000	matched (3)
2172	2017	14100000	5366000000	4776000000	161900000	5503000000	3811000000	1692000000	澳洋健康	2007-09-21	江苏省	苏州市	张家港市			C28	化学纤维制造业	0.0294148	0.692531	22.4286	10	1.12355	0.100634	46000000	0.0085731	1	1	-3.55788	3076	澳洋科技	13.49	D	9.71	1.6	0	0	2.18	0	562500	matched (3)
2182	2010	48900000	2841000000	2589000000	29257047	2612000000	1581000000	1031000000	云海金属	2007-11-13	江苏省	南京市	溧水区	2	2	C32	有色金属冶炼和压延加工业	0.0112024	0.605229	21.6833	3	1.09743		21500000	0.0075552	1	1	-3.25677	1898	云海金属	16.69	D	9.83	1.86	0	0	5	0	100000	matched (3)
2182	2011	54200000	3534000000	3217000000	10874627	2367000000	1276000000	1091000000	云海金属	2007-11-13	江苏省	南京市	溧水区	2	2	C32	有色金属冶炼和压延加工业	0.0045936	0.539149	21.585	4	1.09848	0.24392	24300000	0.0068654	1	1	-3.29042	2342	云海金属	12.93	D	6.63	1.3	0	0	5	0	100000	matched (3)
2182	2012	58600000	3493000000	3164000000	17129676	2790000000	1644000000	1146000000	云海金属	2007-11-13	江苏省	南京市	溧水区	2	2	C32	有色金属冶炼和压延加工业	0.006139	0.589289	21.7494	5	1.10396	-0.0117747	7648850	0.00219	1	1	-3.34057	1779	云海金属	20.13	D	12.8	2.33	0	0	5	0	100000	matched (3)
2182	2013	62500000	3720000000	3413000000	3.02501e+06	2753000000	1623000000	1130000000	云海金属	2007-11-13	江苏省	南京市	溧水区	2	2	C32	有色金属冶炼和压延加工业	0.0010987	0.58962	21.736	6	1.08995	0.0650978	9873389	0.0026542	1	1	-3.37983	1687	云海金属	21.07	D	13.84	2.23	0	0	5	0	100000	matched (3)
2182	2014	62500000	3216000000	2895000000	18172421	2719000000	1613000000	1106000000	云海金属	2007-11-13	江苏省	南京市	溧水区	2	2	C32	有色金属冶炼和压延加工业	0.0066825	0.593255	21.7237	7	1.11077	-0.135562	11400000	0.0035395	1	1	-3.41914	2973	云海金属	13.34	D	14.49	2.32	0	0	-3.47	0		master only (1)
2182	2015	63600000	3113000000	2776000000	23261841	2929000000	1827000000	1102000000	云海金属	2007-11-13	江苏省	南京市	溧水区	2	2	C32	有色金属冶炼和压延加工业	0.0079429	0.623715	21.7978	8	1.12126	-0.0320357	16300000	0.0052354	1	1	-3.46312	2030	云海金属	19.52	D	13.58	1.49	0	0	4.45	0		master only (1)
2182	2016	63700000	4048000000	3440000000	174700000	3486000000	2055000000	1431000000	云海金属	2007-11-13	江苏省	南京市	溧水区	2	2	C32	有色金属冶炼和压延加工业	0.0501198	0.589437	21.9721	9	1.17678	0.300522	25900000	0.0064091	1	1	-3.51062	2015	云海金属	21.01	D	16.2	1.32	0	0	3.49	0		master only (1)
2182	2017	63800000	4927000000	4303000000	153200000	3722000000	2169000000	1552000000	云海金属	2007-11-13	江苏省	南京市	溧水区	2	2	C32	有色金属冶炼和压延加工业	0.041175	0.582907	22.0374	10	1.14492	0.217082	33300000	0.0067534	1	1	-3.55276	2043	云海金属	20.77	D	16.18	1.13	0	0	3.46	0		master only (1)
2193	2010	2627500	510400000	361800000	44905618	1756000000	1088000000	667300000	如意集团	2007-12-07	山东省	济宁市	任城区			C17	纺织业	0.0255772	0.61991	21.2861	3	1.41074		1809364	0.0035448	1	1	-3.22601	2162	如意集团	12.29	D	4.79	0.45	0	0	7.05	1		master only (1)
2193	2011	2627500	640600000	501300000	11208907	1818000000	1150000000	668800000	如意集团	2007-12-07	山东省	济宁市	任城区			C17	纺织业	0.0061638	0.632248	21.3213	4	1.27784	0.254948	3706919	0.005787	1	1	-3.26928	2220	如意集团	15.08	D	8.05	0.44	0	0	6.59	1		master only (1)
2193	2012	2627500	808000000	698300000	2.03368e+06	1797000000	1126000000	670900000	如意集团	2007-12-07	山东省	济宁市	任城区			C17	纺织业	0.0011319	0.626565	21.3092	5	1.15712	0.261462	1193219	0.0014767	1	1	-3.30817	2136	如意集团	17.76	D	7.5	0.26	0	0	10	1		master only (1)
2193	2013	2627500	587800000	475500000	2.39456e+06	1763000000	1090000000	673000000	如意集团	2007-12-07	山东省	济宁市	任城区			C17	纺织业	0.0013583	0.618267	21.2902	6	1.23606	-0.272578	1624519	0.0027638	1	1	-3.3464	2222	如意集团	18.2	D	7.94	0.26	0	0	10	1		master only (1)
2193	2014	2627500	578000000	452700000	-1.79418e+06	1866000000	1196000000	670600000	如意集团	2007-12-07	山东省	济宁市	任城区			C17	纺织业	-0.0009613	0.640709	21.3473	7	1.27691	-0.0165629	2326651	0.004025	1	1	-3.39163	3213	如意集团	8.19	D	7.59	0.33	0	0	0.27	0	100000	matched (3)
2193	2015	2627500	592400000	497600000	17118361	1916000000	1231000000	685700000	如意集团	2007-12-07	山东省	济宁市	任城区			C17	纺织业	0.0089323	0.642223	21.3737	8	1.19035	0.0247525	8950822	0.0151105	1	1	-3.43396	2062	如意集团	19.42	D	9.04	0.38	0	0	10	0	0	matched (3)
2193	2016	3835126	906100000	741300000	32767865	4425000000	1940000000	2484000000	如意集团	2007-12-07	山东省	济宁市	任城区			C17	纺织业	0.0074059	0.438528	22.2104	9	1.22228	0.529691	31600000	0.0349136	1	1	-3.51665	2197	如意集团	20.07	D	9.68	0.39	0	0	10	0		master only (1)
2193	2017	45500000	1193000000	940900000	83366410	4585000000	1942000000	2643000000	如意集团	2007-12-07	山东省	济宁市	任城区			C17	纺织业	0.0181829	0.423588	22.246	10	1.26819	0.316848	31200000	0.0261208	1	1	-3.55713	2328	如意集团	19.35	D	12.25	0.45	0	0	6.65	0		master only (1)
2201	2010	0	538600000	400100000	15373641	1010000000	627500000	382800000	九鼎新材	2007-12-26	江苏省	南通市	如皋市	2	2	C30	非金属矿物制品业	0.0152171	0.621146	20.7335	3	1.34606		2295880	0.0042628	1	1	-3.16064	2148	九鼎新材	12.96	D	10.15	0.86	0	0	1.95	0		master only (1)
2201	2011	0	649200000	494000000	18662325	1111000000	709700000	401400000	九鼎新材	2007-12-26	江苏省	南通市	如皋市	2	2	C30	非金属矿物制品业	0.0167966	0.638717	20.8286	4	1.31427	0.205357	11200000	0.0171964	1	1	-3.21376	2398	九鼎新材	11.56	D	8.21	0.94	0	0	2.41	0		master only (1)
2201	2012	3981887	652400000	494500000	19541992	1151000000	731600000	419200000	九鼎新材	2007-12-26	江苏省	南通市	如皋市	2	2	C30	非金属矿物制品业	0.0169816	0.635726	20.8637	5	1.31921	0.0048809	12600000	0.019306	1	1	-3.25841	2512	九鼎新材	12.79	D	8.7	0.98	0	0	3.11	0		master only (1)
2201	2013	4061887	626400000	499500000	1.06094e+06	1259000000	838200000	421200000	九鼎新材	2007-12-26	江苏省	南通市	如皋市	2	2	C30	非金属矿物制品业	0.0008424	0.665527	20.9539	6	1.25413	-0.039812	7633452	0.0121864	1	1	-3.30986	2767	九鼎新材	13.17	D	7.15	1.02	0	0	5	0		master only (1)
2201	2014	4061887	743800000	589700000	10734959	1645000000	1215000000	429300000	九鼎新材	2007-12-26	江苏省	南通市	如皋市	2	2	C30	非金属矿物制品业	0.0065269	0.738956	21.2208	7	1.26141	0.187464	6864851	0.0092292	1	1	-3.37966	3132	九鼎新材	11.05	D	9.02	1.12	0	0	0.91	0		master only (1)
2201	2015	14200000	688000000	510500000	15376650	2138000000	1256000000	881100000	九鼎新材	2007-12-26	江苏省	南通市	如皋市	2	2	C30	非金属矿物制品业	0.0071935	0.587795	21.4829	8	1.34773	-0.0750868	7945533	0.0115493	1	1	-3.44295	3077	九鼎新材	12.32	D	8.18	1.04	0	0	3.1	0		master only (1)
2201	2016	14200000	793700000	620500000	3.91753e+06	2422000000	1540000000	882000000	九鼎新材	2007-12-26	江苏省	南通市	如皋市	2	2	C30	非金属矿物制品业	0.0016174	0.635863	21.6079	9	1.27915	0.153752	9416844	0.0118639	1	1	-3.49197	3185	九鼎新材	12.57	D	6.87	0.7	0	0	5	0		master only (1)
2201	2017	14200000	994200000	768600000	-3.60037e+06	2741000000	1861000000	880100000	九鼎新材	2007-12-26	江苏省	南通市	如皋市	2	2	C30	非金属矿物制品业	-0.0013136	0.678898	21.7316	10	1.2936	0.25257	9706267	0.0097627	1	1	-3.53958	3427	九鼎新材	2.09	D	6.44	0.65	0	0	-5	0		master only (1)
2203	2010	680176	9053000000	8534000000	239000000	5427000000	3866000000	1561000000	海亮股份	2008-01-16	浙江省	绍兴市	诸暨市			C32	有色金属冶炼和压延加工业	0.0440406	0.712349	22.4147	2	1.06073		46000000	0.0050832	1	1	-3.23792	239	海亮股份	56.96	C	14.72	7.89	10	23	1.35	0	0	matched (3)
2203	2011	680176	11880000000	11360000000	232500000	6938000000	4402000000	2536000000	海亮股份	2008-01-16	浙江省	绍兴市	诸暨市			C32	有色金属冶炼和压延加工业	0.0335092	0.63453	22.6603	3	1.04546	0.312098	30000000	0.0025275	1	1	-3.27471	520	海亮股份	47.05	C	15.23	7.84	9	14	0.98	0		master only (1)
2203	2012	933574	10350000000	9774000000	233500000	6436000000	3742000000	2694000000	海亮股份	2008-01-16	浙江省	绍兴市	诸暨市			C32	有色金属冶炼和压延加工业	0.0362862	0.581455	22.5851	4	1.05894	-0.128637	12200000	0.0011814	1	1	-3.31624	457	海亮股份	58.29	C	16.6	8.72	12	20	0.97	0		master only (1)
2203	2013	5716593	13090000000	12470000000	287800000	7316000000	4432000000	2885000000	海亮股份	2008-01-16	浙江省	绍兴市	诸暨市			C32	有色金属冶炼和压延加工业	0.0393374	0.605727	22.7134	5	1.05031	0.2652	6599106	0.000504	1	1	-3.35333	599	海亮股份	48.76	C	15.99	11.04	12	8	1.73	0		master only (1)
2203	2014	5036417	12060000000	11250000000	451900000	8216000000	4974000000	3242000000	海亮股份	2008-01-16	浙江省	绍兴市	诸暨市			C32	有色金属冶炼和压延加工业	0.054999	0.605384	22.8294	6	1.07176	-0.0789104	15700000	0.0012982	1	1	-3.38948	1636	海亮股份	20.86	D	16.64	2.91	0	0	1.31	0		master only (1)
2203	2015	5198810	13590000000	12790000000	478600000	9220000000	5086000000	4133000000	海亮股份	2008-01-16	浙江省	绍兴市	诸暨市			C32	有色金属冶炼和压延加工业	0.0519152	0.551686	22.9446	7	1.06244	0.126813	46100000	0.0033928	1	1	-3.42451	2263	海亮股份	18.58	D	15.37	2.26	0	0	0.95	0		master only (1)
2203	2016	5198810	17920000000	16560000000	565300000	12760000000	8115000000	4649000000	海亮股份	2008-01-16	浙江省	绍兴市	诸暨市			C32	有色金属冶炼和压延加工业	0.044289	0.635792	23.2699	8	1.08207	0.318307	45700000	0.002552	1	1	-3.44431	352	海亮股份	58.82	C	15.73	10.84	15	14	3.25	0		master only (1)
2203	2017	7087804	29820000000	28110000000	720400000	15280000000	9758000000	5522000000	海亮股份	2008-01-16	浙江省	绍兴市	诸暨市			C32	有色金属冶炼和压延加工业	0.0471442	0.638635	23.4498	9	1.06083	0.664123	48900000	0.0016408	1	1	-3.46923	2518	海亮股份	18.3	D	14.43	2.49	0	0	1.38	0		master only (1)
2205	2010	3052000	542800000	370000000	66239086	1461000000	537500000	923800000	国统股份	2008-01-23	新疆维吾尔自治区	乌鲁木齐市	米东区			C30	非金属矿物制品业	0.0453291	0.367841	21.1026	2	1.46677		2417750	0.0044546	3	0	-3.16721	1165	国统股份	21.51	D	14.5	3.13	0	0	3.88	1		master only (1)
2205	2011	3052000	640100000	478700000	32050386	1569000000	624700000	944200000	国统股份	2008-01-23	新疆维吾尔自治区	乌鲁木齐市	米东区			C30	非金属矿物制品业	0.0204283	0.398183	21.1737	3	1.33731	0.179433	5650370	0.0088267	3	0	-3.21483	1962	国统股份	17.89	D	11.57	1.89	0	0	4.43	1		master only (1)
2205	2012	3052000	472400000	332900000	13085511	1572000000	623100000	948600000	国统股份	2008-01-23	新疆维吾尔自治区	乌鲁木齐市	米东区			C30	非金属矿物制品业	0.0083256	0.39647	21.1754	4	1.41903	-0.262105	1948700	0.0041255	3	0	-3.25502	2106	国统股份	17.95	D	11.01	1.94	0	0	5	1		master only (1)
2205	2013	3052000	871000000	619000000	56903799	1982000000	978000000	1004000000	国统股份	2008-01-23	新疆维吾尔自治区	乌鲁木齐市	米东区			C30	非金属矿物制品业	0.0287076	0.4934	21.4075	5	1.40705	0.843872	554560	0.0006367	3	0	-3.31685	1277	国统股份	23.89	D	17.29	2.21	0	0	4.39	1		master only (1)
2205	2014	3052000	803400000	606300000	60159037	1760000000	718600000	1041000000	国统股份	2008-01-23	新疆维吾尔自治区	乌鲁木齐市	米东区			C30	非金属矿物制品业	0.0341874	0.408358	21.2884	6	1.32513	-0.077528	928460	0.0011556	3	0	-3.34622	1105	国统股份	23.66	D	17.75	1.73	0	0	4.18	1		master only (1)
2205	2015	3052000	393000000	323700000	-60868871	1677000000	718100000	959300000	国统股份	2008-01-23	新疆维吾尔自治区	乌鲁木齐市	米东区			C30	非金属矿物制品业	-0.036287	0.428098	21.2405	7	1.21413	-0.510877	3887340	0.0098918	3	0	-3.38161	3340	国统股份	2.91	D	2.15	0.94	0	0	-0.18	1		master only (1)
2205	2016	3646017	600700000	457200000	4.44298e+06	2145000000	1181000000	963800000	国统股份	2008-01-23	新疆维吾尔自治区	乌鲁木齐市	米东区			C30	非金属矿物制品业	0.0020712	0.550707	21.4864	8	1.31393	0.528645	1328051	0.0022107	3	0	-3.44322	3041	国统股份	14.56	D	8.34	1.22	0	0	5	1		master only (1)
2205	2017	18300000	789100000	621700000	17630633	2528000000	1400000000	1127000000	国统股份	2008-01-23	新疆维吾尔自治区	乌鲁木齐市	米东区			C30	非金属矿物制品业	0.006975	0.55395	21.6506	9	1.26932	0.313574	1873785	0.0023746	3	0	-3.49475	2834	国统股份	16	D	9.52	1.48	0	0	5	1		master only (1)
2206	2010	1759062	1655000000	1380000000	153200000	1848000000	776900000	1071000000	海利得	2008-01-23	浙江省	嘉兴市	海宁市			C28	化学纤维制造业	0.0829249	0.4205	21.3371	2	1.19928		14700000	0.008895	1	1	-3.19072	1224	海利得	21.2	D	15.29	3.73	0	0	2.18	0		master only (1)
2206	2011	1759062	2356000000	1975000000	200000000	2637000000	577700000	2060000000	海利得	2008-01-23	浙江省	嘉兴市	海宁市			C28	化学纤维制造业	0.0758209	0.219044	21.693	3	1.19248	0.423575	21000000	0.0089023	1	1	-3.25735	924	海利得	26.14	D	20.47	3.08	0	0	2.59	0		master only (1)
2206	2012	2248050	1951000000	1665000000	86407717	3084000000	1115000000	1969000000	海利得	2008-01-23	浙江省	嘉兴市	海宁市			C28	化学纤维制造业	0.0280213	0.361597	21.8494	4	1.17166	-0.171988	14100000	0.0072095	1	1	-3.30561	1591	海利得	21.63	D	16.11	3.33	0	0	2.19	0		master only (1)
2206	2013	2332665	2149000000	1821000000	100700000	3265000000	1272000000	1993000000	海利得	2008-01-23	浙江省	嘉兴市	海宁市			C28	化学纤维制造业	0.0308239	0.389594	21.9067	5	1.17984	0.101524	14700000	0.006843	1	1	-3.34811	1428	海利得	22.8	D	17.14	3.06	0	0	2.6	0		master only (1)
2206	2014	3023382	2286000000	1832000000	144800000	3338000000	1293000000	2045000000	海利得	2008-01-23	浙江省	嘉兴市	海宁市			C28	化学纤维制造业	0.0433746	0.3874	21.9286	6	1.24783	0.0640239	11500000	0.0050447	1	1	-3.38899	833	海利得	25.15	D	18.58	3.23	0	0	3.34	0		master only (1)
2206	2015	3049586	2121000000	1652000000	197900000	3638000000	1513000000	2125000000	海利得	2008-01-23	浙江省	嘉兴市	海宁市			C28	化学纤维制造业	0.0544077	0.415804	22.0147	7	1.28371	-0.0722392	19700000	0.0092734	1	1	-3.43205	797	海利得	26.43	D	20.53	3.26	0	0	2.64	0	133700	matched (3)
2206	2016	5561404	2567000000	1958000000	256300000	4196000000	1405000000	2792000000	海利得	2008-01-23	浙江省	嘉兴市	海宁市			C28	化学纤维制造业	0.0610838	0.334701	22.1575	8	1.31066	0.210099	21200000	0.0082521	1	1	-3.47573	1100	海利得	26.46	D	20.96	2.5	0	0	3	0		master only (1)
2206	2017	13400000	3186000000	2465000000	315500000	4384000000	1508000000	2876000000	海利得	2008-01-23	浙江省	嘉兴市	海宁市			C28	化学纤维制造业	0.0719645	0.343895	22.2012	9	1.29236	0.241388	17400000	0.0054686	1	1	-3.5165	2641	海利得	17.51	D	12.48	2.57	0	0	2.46	0		master only (1)
2211	2010	674976	949000000	735300000	90900423	2462000000	732000000	1730000000	宏达新材	2008-02-01	江苏省	镇江市	扬中市	1	2	C26	化学原料及化学制品制造业	0.0369169	0.297295	21.6244	2	1.29059		6476150	0.0068243	1	1	-3.21306	1955	宏达新材	15.98	D	12.4	0.96	0	0	2.62	0	0	matched (3)
2211	2011	966386	944700000	822500000	-18447733	2467000000	755500000	1711000000	宏达新材	2008-02-01	江苏省	镇江市	扬中市	1	2	C26	化学原料及化学制品制造业	-0.0074791	0.3063	21.6261	3	1.14854	-0.0045532	2757588	0.0029191	1	1	-3.25318	2579	宏达新材	1.68	D	-2.33	1.12	0	0	2.89	0		master only (1)
2211	2012	23000000	829600000	717900000	4.53665e+06	2675000000	953800000	1721000000	宏达新材	2008-02-01	江苏省	镇江市	扬中市	1	2	C26	化学原料及化学制品制造业	0.0016959	0.356544	21.7072	4	1.1555	-0.121843	39600000	0.0477663	1	1	-3.29819	2841	宏达新材	-6.52	E	-2.07	0.55	0	0	-5	0	10000000	matched (3)
2211	2013	23000000	803000000	835000000	-880600000	1737000000	897900000	839400000	宏达新材	2008-02-01	江苏省	镇江市	扬中市	1	2	C26	化学原料及化学制品制造业	-0.506888	0.516825	21.2756	5	0.961654	-0.0320266	2676005	0.0033325	1	1	-3.30501	3112	宏达新材	-2.78	E	-3.71	1.14	0	0	-0.21	0	30000	matched (3)
2211	2014	983186	773800000	677300000	14045101	1265000000	412100000	852800000	宏达新材	2008-02-01	江苏省	镇江市	扬中市	1	2	C26	化学原料及化学制品制造业	0.0111037	0.325825	20.9583	6	1.14241	-0.0363789	33900000	0.0438222	1	1	-3.3104	3218	宏达新材	8.08	D	5.64	1.11	0	0	1.33	0	0	matched (3)
2211	2015	883357	671200000	590400000	-60040434	1034000000	241500000	792400000	宏达新材	2008-02-01	江苏省	镇江市	扬中市	1	2	C26	化学原料及化学制品制造业	-0.0580721	0.233539	20.7566	7	1.13694	-0.132522	8584000	0.0127882	1	1	-3.3239	3566	宏达新材	-6.06	E	-6.63	0.72	0	0	-0.15	0		master only (1)
2211	2016	883357	682800000	589800000	11824530	1068000000	263900000	803900000	宏达新材	2008-02-01	江苏省	镇江市	扬中市	1	2	C26	化学原料及化学制品制造业	0.0110738	0.247123	20.7889	8	1.15773	0.0172361	16100000	0.0235074	1	1	-3.36837	3521	宏达新材	-1.08	E	-1.22	0.72	0	0	-0.58	0		master only (1)
2211	2017	883357	945000000	827300000	24025395	1193000000	367000000	826300000	宏达新材	2008-02-01	江苏省	镇江市	扬中市	1	2	C26	化学原料及化学制品制造业	0.0201336	0.307516	20.9	9	1.14225	0.384028	1008470	0.0010671	1	1	-3.4231	3275	宏达新材	8.96	D	7.23	0.94	0	0	0.79	0		master only (1)
2215	2010	76000000	1456000000	848400000	110300000	1622000000	334000000	1288000000	诺普信	2008-02-18	广东省	深圳市	宝安区			C26	化学原料及化学制品制造业	0.0680359	0.205933	21.2067	2	1.716		10300000	0.0071077	1	1	-3.17824	1667	诺普信	18.73	D	14.2	1.9	0	0	2.63	0	5000000	matched (3)
2215	2011	86700000	1555000000	895200000	82202053	2080000000	796300000	1283000000	诺普信	2008-02-18	广东省	深圳市	宝安区			C26	化学原料及化学制品制造业	0.0395238	0.382883	21.4555	3	1.73693	0.0680014	13100000	0.0084036	1	1	-3.24079	1161	诺普信	23.74	D	17.83	2.98	0	0	2.93	0	0	matched (3)
2215	2012	87200000	1598000000	937700000	131800000	2017000000	635400000	1382000000	诺普信	2008-02-18	广东省	深圳市	宝安区			C26	化学原料及化学制品制造业	0.0653577	0.314975	21.425	4	1.70357	0.027379	20000000	0.0125485	1	1	-3.27831	1342	诺普信	23.39	D	17.32	4	0	0	2.07	0		master only (1)
2215	2013	89600000	1736000000	1024000000	178100000	2579000000	1079000000	1500000000	诺普信	2008-02-18	广东省	深圳市	宝安区			C26	化学原料及化学制品制造业	0.0690544	0.41834	21.6705	5	1.69492	0.0863745	8537103	0.0049191	1	1	-3.33599	973	诺普信	26.5	D	20.98	4	0	0	1.52	0	1770000	matched (3)
2215	2014	89700000	2203000000	1346000000	194000000	2526000000	959200000	1567000000	诺普信	2008-02-18	广东省	深圳市	宝安区			C26	化学原料及化学制品制造业	0.0767808	0.379692	21.65	6	1.63687	0.269215	21600000	0.0097945	1	1	-3.37471	687	诺普信	26.24	D	18.91	4	0	0	3.33	0	500000	matched (3)
2215	2015	143000000	2210000000	1226000000	233200000	3077000000	1308000000	1769000000	诺普信	2008-02-18	广东省	深圳市	宝安区			C26	化学原料及化学制品制造业	0.0757945	0.425231	21.8472	7	1.80199	0.0031872	8084820	0.0036587	1	1	-3.42551	970	诺普信	25.26	D	19.44	4	0	0	1.82	0	0	matched (3)
2215	2016	224000000	1963000000	1240000000	-276400000	3148000000	1406000000	1742000000	诺普信	2008-02-18	广东省	深圳市	宝安区			C26	化学原料及化学制品制造业	-0.0877955	0.446729	21.8702	8	1.58318	-0.111696	15100000	0.007673	1	1	-3.46655	3419	诺普信	3.83	D	-0.53	3.78	0	0	0.58	0		master only (1)
2215	2017	348000000	2822000000	1831000000	320400000	4542000000	2297000000	2246000000	诺普信	2008-02-18	广东省	深圳市	宝安区			C26	化学原料及化学制品制造业	0.07054	0.505574	22.2367	9	1.54129	0.437433	14300000	0.0050526	1	1	-3.51701	1019	诺普信	25.77	D	20.04	4	0	0	1.73	0		master only (1)
2224	2010	1122510	720800000	554000000	61787813	598900000	149100000	449700000	三力士	2008-04-25	浙江省	绍兴市	柯桥区			C29	橡胶和塑料制品业	0.103172	0.249045	20.2106	2	1.3011		2982138	0.0041372	1	1	-3.0346	470	三力士	46.4	C	15.95	8	12	8	2.45	0		master only (1)
2224	2011	1189177	873300000	714000000	43708665	689700000	151900000	537800000	三力士	2008-04-25	浙江省	绍兴市	柯桥区			C29	橡胶和塑料制品业	0.0633746	0.220234	20.3517	3	1.22309	0.211569	2996300	0.003431	1	1	-3.10014	1846	三力士	18.75	D	14.57	1.69	0	0	2.49	0		master only (1)
2224	2012	1231912	885000000	688700000	67408427	810800000	196100000	614700000	三力士	2008-04-25	浙江省	绍兴市	柯桥区			C29	橡胶和塑料制品业	0.0831411	0.241865	20.5135	4	1.28497	0.0133385	1200787	0.0013569	1	1	-3.16731	238	三力士	66.29	B	18.61	11.17	14	20	2.51	0		master only (1)
2224	2013	1231912	944500000	645900000	147200000	1177000000	102400000	1075000000	三力士	2008-04-25	浙江省	绍兴市	柯桥区			C29	橡胶和塑料制品业	0.12501	0.0869353	20.8866	5	1.46231	0.0673248	2259500	0.0023922	1	1	-3.26138	279	三力士	67.86	B	21.62	11.69	15	17	2.55	0		master only (1)
2224	2014	1586078	969700000	612500000	198200000	1396000000	116000000	1280000000	三力士	2008-04-25	浙江省	绍兴市	柯桥区			C29	橡胶和塑料制品业	0.142051	0.0831287	21.0566	6	1.58303	0.0265856	4057668	0.0041847	1	1	-3.32205	643	三力士	26.58	D	21.25	2.85	0	0	2.48	0		master only (1)
2224	2015	1586078	931100000	533700000	244200000	1580000000	124600000	1456000000	三力士	2008-04-25	浙江省	绍兴市	柯桥区			C29	橡胶和塑料制品业	0.154533	0.078856	21.1809	7	1.7445	-0.0397468	3552690	0.0038155	1	1	-3.37559	815	三力士	26.26	D	21.17	2.4	0	0	2.69	0		master only (1)
2224	2016	24600000	835600000	474600000	223400000	1772000000	152200000	1620000000	三力士	2008-04-25	浙江省	绍兴市	柯桥区			C29	橡胶和塑料制品业	0.126101	0.0859264	21.2953	8	1.7607	-0.102543	2567335	0.0030723	1	1	-3.42687	1153	三力士	26.09	D	21.12	2.09	0	0	2.88	0		master only (1)
2224	2017	25700000	902000000	575600000	160100000	1976000000	246400000	1729000000	三力士	2008-04-25	浙江省	绍兴市	柯桥区			C29	橡胶和塑料制品业	0.0810578	0.124712	21.4041	9	1.56705	0.0794349	2815141	0.003121	1	1	-3.47656	1595	三力士	23.04	D	18.26	2.13	0	0	2.65	0		master only (1)
2225	2010	2545969	1592000000	1042000000	154200000	2222000000	975800000	1246000000	濮耐股份	2008-04-25	河南省	濮阳市	濮阳县	2	2	C30	非金属矿物制品业	0.0693788	0.439136	21.5217	2	1.52773		5191821	0.0032609	2	0	-3.20589	1862	濮耐股份	17.06	D	13.45	1.08	0	0	2.53	0		master only (1)
2225	2011	103000000	2021000000	1418000000	126800000	2907000000	1574000000	1333000000	濮耐股份	2008-04-25	河南省	濮阳市	濮阳县	2	2	C30	非金属矿物制品业	0.0436274	0.541438	21.7904	3	1.42499	0.269074	5412788	0.0026789	2	0	-3.26274	2105	濮耐股份	16.56	D	12.96	1.02	0	0	2.58	0		master only (1)
2225	2012	103000000	2146000000	1530000000	103000000	3106000000	1719000000	1387000000	濮耐股份	2008-04-25	河南省	濮阳市	濮阳县	2	2	C30	非金属矿物制品业	0.0331487	0.553475	21.8566	4	1.40241	0.0619366	13000000	0.0060588	2	0	-3.30594	2296	濮耐股份	16.31	D	12.79	1.21	0	0	2.31	0		master only (1)
2225	2013	104000000	2432000000	1726000000	129000000	3783000000	1865000000	1918000000	濮耐股份	2008-04-25	河南省	濮阳市	濮阳县	2	2	C30	非金属矿物制品业	0.0340922	0.493043	22.0538	5	1.40902	0.133654	6000167	0.0024667	2	0	-3.35324	2403	濮耐股份	17.11	D	13.51	1.27	0	0	2.33	0		master only (1)
2225	2014	115000000	2611000000	1812000000	165100000	4899000000	2463000000	2437000000	濮耐股份	2008-04-25	河南省	濮阳市	濮阳县	2	2	C30	非金属矿物制品业	0.0337047	0.502663	22.3124	6	1.44132	0.0733964	8845270	0.0033877	2	0	-3.39773	2263	濮耐股份	18.11	D	14.09	1.36	0	0	2.66	0		master only (1)
2225	2015	120000000	2794000000	1961000000	88804024	5155000000	2521000000	2634000000	濮耐股份	2008-04-25	河南省	濮阳市	濮阳县	2	2	C30	非金属矿物制品业	0.0172273	0.488975	22.3632	7	1.42499	0.0699829	23200000	0.0083063	2	0	-3.43794	2684	濮耐股份	16.49	D	11.3	1.35	0	0	3.84	0		master only (1)
2225	2016	120000000	2339000000	1638000000	-176400000	4680000000	2252000000	2428000000	濮耐股份	2008-04-25	河南省	濮阳市	濮阳县	2	2	C30	非金属矿物制品业	-0.0377023	0.48117	22.2665	8	1.42806	-0.162934	22900000	0.0098034	2	0	-3.47735	513	濮耐股份	46.69	C	6.41	10.37	11	20	-1.09	0		master only (1)
2225	2017	158000000	2815000000	1979000000	31290579	4785000000	2312000000	2473000000	濮耐股份	2008-04-25	河南省	濮阳市	濮阳县	2	2	C30	非金属矿物制品业	0.0065387	0.483155	22.2888	9	1.42237	0.203582	25300000	0.0089959	2	0	-3.51756	3169	濮耐股份	12.03	D	7.12	1.15	0	0	3.76	0		master only (1)
2226	2010	0	324200000	174500000	76615884	491900000	45502157	446400000	江南化工	2008-05-06	安徽省	宣城市	宁国市	2	2	C26	化学原料及化学制品制造业	0.155757	0.0925041	20.0138	2	1.85749		905178	0.0027923	2	0	-2.99613	748	江南化工	25.15	D	18.19	4	0	0	2.96	0		master only (1)
2226	2011	21900000	1214000000	701600000	221100000	3190000000	709100000	2481000000	江南化工	2008-05-06	安徽省	宣城市	宁国市	2	2	C26	化学原料及化学制品制造业	0.0692922	0.222259	21.8834	3	1.73015	2.74463	4484706	0.0036945	2	0	-3.26713	915	江南化工	26.25	D	20.85	1.97	0	0	3.43	0		master only (1)
2226	2012	34000000	1774000000	927800000	339600000	3456000000	730700000	2725000000	江南化工	2008-05-06	安徽省	宣城市	宁国市	2	2	C26	化学原料及化学制品制造业	0.0982535	0.211433	21.9634	4	1.91168	0.461202	8689813	0.0048991	2	0	-3.31031	867	江南化工	28.42	D	23.14	2.17	0	0	3.11	0		master only (1)
2226	2013	36200000	1936000000	979900000	357300000	4012000000	1068000000	2944000000	江南化工	2008-05-06	安徽省	宣城市	宁国市	2	2	C26	化学原料及化学制品制造业	0.0890696	0.266289	22.1125	5	1.9756	0.091387	12300000	0.006375	2	0	-3.35476	807	江南化工	28.93	D	22.67	2.46	0	0	3.8	0		master only (1)
2226	2014	55000000	1793000000	919600000	233200000	4025000000	995400000	3030000000	江南化工	2008-05-06	安徽省	宣城市	宁国市	2	2	C26	化学原料及化学制品制造业	0.0579342	0.24729	22.1158	6	1.94929	-0.0740186	10200000	0.0057136	2	0	-3.39484	706	江南化工	26.09	D	19.8	2.38	0	0	3.91	0		master only (1)
2226	2015	55800000	1358000000	709300000	70434463	4635000000	1026000000	3610000000	江南化工	2008-05-06	安徽省	宣城市	宁国市	2	2	C26	化学原料及化学制品制造业	0.0151951	0.221288	22.257	7	1.91477	-0.242372	8929200	0.0065748	2	0	-3.43725	2789	江南化工	15.7	D	8.28	2.42	0	0	5	0	80000	matched (3)
2226	2016	56600000	1352000000	717900000	85448215	5121000000	958600000	4162000000	江南化工	2008-05-06	安徽省	宣城市	宁国市	2	2	C26	化学原料及化学制品制造业	0.0166872	0.187203	22.3565	8	1.88335	-0.0044593	10600000	0.0078378	2	0	-3.47792	2095	江南化工	20.58	D	12.9	2.68	0	0	5	0	46000	matched (3)
2226	2017	59900000	1654000000	972600000	120200000	5127000000	1059000000	4068000000	江南化工	2008-05-06	安徽省	宣城市	宁国市	2	2	C26	化学原料及化学制品制造业	0.0234414	0.206544	22.3578	9	1.70061	0.223316	31500000	0.0190285	2	0	-3.51793	1850	江南化工	21.76	D	14.27	2.67	0	0	4.82	0	500000	matched (3)
2228	2010	1420307	1521000000	1264000000	72643649	1626000000	795500000	830400000	合兴包装	2008-05-08	福建省	厦门市	同安区	1	1	C22	造纸及纸制品业	0.0446781	0.489272	21.2094	2	1.20332		7314886	0.0048093	1	1	-3.1785	2021	合兴包装	15.08	D	12.27	0.09	0	0	2.72	0		master only (1)
2228	2011	1556426	1918000000	1603000000	76309198	1814000000	924900000	889400000	合兴包装	2008-05-08	福建省	厦门市	同安区	1	1	C22	造纸及纸制品业	0.0420599	0.509794	21.319	3	1.19703	0.261301	14000000	0.0073018	1	1	-3.22907	1851	合兴包装	18.74	D	14.83	0.1	0	0	3.81	0		master only (1)
2228	2012	1571349	2115000000	1738000000	65410096	2142000000	1224000000	918100000	合兴包装	2008-05-08	福建省	厦门市	同安区	1	1	C22	造纸及纸制品业	0.0305419	0.5713	21.4848	4	1.21668	0.102413	7027560	0.0033229	1	1	-3.2831	1799	合兴包装	19.92	D	15.71	0.13	0	0	4.08	0		master only (1)
2228	2013	2471313	2442000000	1953000000	102000000	2208000000	1217000000	991300000	合兴包装	2008-05-08	福建省	厦门市	同安区	1	1	C22	造纸及纸制品业	0.0461936	0.551012	21.5153	5	1.25022	0.154709	9583800	0.0039244	1	1	-3.32541	2318	合兴包装	17.7	D	14	0.14	0	0	3.56	0	20000	matched (3)
2228	2014	2541654	2716000000	2155000000	131900000	2449000000	1361000000	1088000000	合兴包装	2008-05-08	福建省	厦门市	同安区	1	1	C22	造纸及纸制品业	0.0538567	0.555621	21.6189	6	1.26033	0.11236	6670640	0.0024556	1	1	-3.3727	1964	合兴包装	19.25	D	15.19	0.14	0	0	3.92	0	0	matched (3)
2228	2015	3012896	2852000000	2290000000	123100000	2983000000	1372000000	1611000000	合兴包装	2008-05-08	福建省	厦门市	同安区	1	1	C22	造纸及纸制品业	0.041281	0.460042	21.8163	7	1.24567	0.0500647	5904496	0.00207	1	1	-3.42404	2225	合兴包装	18.73	D	14.27	0.22	0	0	4.24	0		master only (1)
2228	2016	3156349	4560000000	3802000000	439100000	5429000000	3392000000	2037000000	合兴包装	2008-05-08	福建省	厦门市	同安区	1	1	C22	造纸及纸制品业	0.0808864	0.624875	22.415	8	1.19938	0.598652	30400000	0.0066665	1	1	-3.47792	2283	合兴包装	19.67	D	17.6	0.7	0	0	1.37	0		master only (1)
2228	2017	15400000	8748000000	7494000000	190100000	6462000000	3692000000	2770000000	合兴包装	2008-05-08	福建省	厦门市	同安区	1	1	C22	造纸及纸制品业	0.0294131	0.571341	22.5892	9	1.16735	0.918333	21500000	0.0024536	1	1	-3.51617	2380	合兴包装	19.12	D	13.18	0.94	0	0	5	0		master only (1)
2233	2010	104000000	3128000000	2216000000	311000000	4785000000	2463000000	2322000000	塔牌集团	2008-05-16	广东省	梅州市	蕉岭县	1	2	C30	非金属矿物制品业	0.0649948	0.514675	22.2887	2	1.41174		3773885	0.0012065	1	1	-3.23756	101	塔牌集团	62.76	B	16.91	7.85	10	23	5	0		master only (1)
2233	2011	135000000	4137000000	2851000000	608700000	5229000000	1802000000	3426000000	塔牌集团	2008-05-16	广东省	梅州市	蕉岭县	1	2	C30	非金属矿物制品业	0.116407	0.344706	22.3774	3	1.45102	0.322533	4426950	0.0010702	1	1	-3.27796	84	塔牌集团	71.37	B	22.96	10.15	10	23.5	4.76	0		master only (1)
2233	2012	295000000	3486000000	2723000000	200800000	5119000000	1649000000	3470000000	塔牌集团	2008-05-16	广东省	梅州市	蕉岭县	1	2	C30	非金属矿物制品业	0.0392295	0.322074	22.3562	4	1.28024	-0.157312	1918187	0.0005503	1	1	-3.31792	79	塔牌集团	73.9	B	17.43	12.47	13	23	8	0	400000	matched (3)
2233	2013	311000000	3816000000	2829000000	397400000	5445000000	1625000000	3820000000	塔牌集团	2008-05-16	广东省	梅州市	蕉岭县	1	2	C30	非金属矿物制品业	0.0729747	0.298451	22.418	5	1.34877	0.0946978	11600000	0.0030468	1	1	-3.35791	5	塔牌集团	82.13	A	22.05	13.08	15	23	9	0	33000	matched (3)
2233	2014	318000000	4457000000	3142000000	607600000	5408000000	1153000000	4255000000	塔牌集团	2008-05-16	广东省	梅州市	蕉岭县	1	2	C30	非金属矿物制品业	0.112346	0.213263	22.4112	6	1.41861	0.167867	4729411	0.0010612	1	1	-3.39793	25	塔牌集团	73.07	B	24.32	14	12	14	8.75	0	100000	matched (3)
2233	2015	324000000	3834000000	2940000000	380500000	6035000000	1654000000	4381000000	塔牌集团	2008-05-16	广东省	梅州市	蕉岭县	1	2	C30	非金属矿物制品业	0.0630437	0.274122	22.5208	7	1.30409	-0.139777	13500000	0.0035342	1	1	-3.43717	16	塔牌集团	78.7	B	22.27	13.67	15	23	4.76	0	0	matched (3)
2233	2016	363000000	3629000000	2682000000	454700000	6734000000	2049000000	4684000000	塔牌集团	2008-05-16	广东省	梅州市	蕉岭县	1	2	C30	非金属矿物制品业	0.0675212	0.304332	22.6304	8	1.35322	-0.053363	6464034	0.0017811	1	1	-3.47538	14	塔牌集团	80.17	A	21.3	14.49	15	23	6.38	0		master only (1)
2233	2017	371000000	4564000000	3217000000	721700000	9792000000	1604000000	8188000000	塔牌集团	2008-05-16	广东省	梅州市	蕉岭县	1	2	C30	非金属矿物制品业	0.0737016	0.163825	23.0049	9	1.4188	0.257612	8202366	0.0017972	1	1	-3.50145	223	塔牌集团	31.46	D	22.81	4	0	0	4.65	0	10000	matched (3)
2237	2010	26400000	4955000000	4383000000	190400000	5547000000	4181000000	1365000000	恒邦股份	2008-05-20	山东省	烟台市	牟平区			C32	有色金属冶炼和压延加工业	0.0343343	0.753871	22.4365	2	1.1304		4224000	0.0008526	1	1	-3.23785	1463	恒邦股份	19.83	D	14.12	1.04	0	0	4.67	0	200000	matched (3)
2237	2011	69300000	9349000000	8465000000	239300000	7835000000	4946000000	2889000000	恒邦股份	2008-05-20	山东省	烟台市	牟平区			C32	有色金属冶炼和压延加工业	0.0305374	0.631288	22.7819	3	1.10444	0.886988	4155350	0.0004445	1	1	-3.2712	1854	恒邦股份	18.72	D	14.43	1.11	0	0	3.18	0	500000	matched (3)
2237	2012	69300000	10540000000	9583000000	287200000	10160000000	7012000000	3152000000	恒邦股份	2008-05-20	山东省	烟台市	牟平区			C32	有色金属冶炼和压延加工业	0.0282614	0.689859	23.0421	4	1.10025	0.127788	12900000	0.0012252	1	1	-3.29941	2303	恒邦股份	16.27	D	11.81	1.74	0	0	2.72	0	2060000	matched (3)
2237	2013	82300000	11840000000	11050000000	222900000	11300000000	7913000000	3390000000	恒邦股份	2008-05-20	山东省	烟台市	牟平区			C32	有色金属冶炼和压延加工业	0.0197193	0.700096	23.1483	5	1.07165	0.123185	9117060	0.0007698	1	1	-3.33293	2502	恒邦股份	16.19	D	10.76	1.93	0	0	3.5	0	60000	matched (3)
2237	2014	120000000	15380000000	14440000000	238100000	11220000000	7632000000	3587000000	恒邦股份	2008-05-20	山东省	烟台市	牟平区			C32	有色金属冶炼和压延加工业	0.0212226	0.680283	23.1408	6	1.0652	0.29911	6117421	0.0003976	1	1	-3.37341	3038	恒邦股份	12.51	D	7.11	1.21	0	0	4.19	0	1069000	matched (3)
2237	2015	127000000	14140000000	13270000000	163000000	11790000000	8117000000	3671000000	恒邦股份	2008-05-20	山东省	烟台市	牟平区			C32	有色金属冶炼和压延加工业	0.0138249	0.688583	23.1904	7	1.0656	-0.0806586	11700000	0.0008281	1	1	-3.41009	67	恒邦股份	70.55	B	10.11	12.14	15	30	3.3	0	1177500	matched (3)
2237	2016	127000000	16400000000	15290000000	204200000	13290000000	9456000000	3829000000	恒邦股份	2008-05-20	山东省	烟台市	牟平区			C32	有色金属冶炼和压延加工业	0.0153697	0.711783	23.3099	8	1.07274	0.15932	8346932	0.000509	1	1	-3.4412	192	恒邦股份	65.8	B	10.32	12.06	12	23	8.42	0	1540000	matched (3)
2237	2017	125000000	19520000000	18110000000	356800000	12930000000	8714000000	4217000000	恒邦股份	2008-05-20	山东省	烟台市	牟平区			C32	有色金属冶炼和压延加工业	0.0275958	0.673905	23.2828	9	1.07811	0.190637	6908449	0.0003539	1	1	-3.48332	2670	恒邦股份	17.32	D	13.4	0.85	0	0	3.07	0	520000	matched (3)
2243	2011	4129382	929500000	703400000	105200000	1138000000	427300000	711100000	通产丽星	2008-05-28	广东省	深圳市	龙岗区			C29	橡胶和塑料制品业	0.0923936	0.375349	20.8529	3	1.32129	0.301683	14300000	0.0154278	1	1	-3.17699	1919	通产丽星	18.2	D	16.34	0	0	0	1.86	1		master only (1)
2243	2012	5059989	1056000000	830500000	76339191	1389000000	612400000	776300000	通产丽星	2008-05-28	广东省	深圳市	龙岗区			C29	橡胶和塑料制品业	0.0549706	0.440964	21.0516	4	1.27206	0.136591	12200000	0.0115369	1	1	-3.24148	2053	通产丽星	18.33	D	13.73	2.72	0	0	1.88	1		master only (1)
2243	2013	6304431	1136000000	913300000	62438308	2030000000	503600000	1526000000	通产丽星	2008-05-28	广东省	深圳市	龙岗区			C29	橡胶和塑料制品业	0.0307607	0.248102	21.4312	5	1.24338	0.0749684	9212709	0.0081126	1	1	-3.31882	2488	通产丽星	16.33	D	11.61	2.96	0	0	1.76	1		master only (1)
2243	2014	7709353	1063000000	923600000	-35894113	1951000000	471200000	1480000000	通产丽星	2008-05-28	广东省	深圳市	龙岗区			C29	橡胶和塑料制品业	-0.0183951	0.241465	21.3917	6	1.15073	-0.0641208	7183618	0.0067592	1	1	-3.35551	3170	通产丽星	9.76	D	5.15	2.28	0	0	2.33	1		master only (1)
2243	2015	8604729	1021000000	847400000	13111401	1757000000	263200000	1493000000	通产丽星	2008-05-28	广东省	深圳市	龙岗区			C29	橡胶和塑料制品业	0.007464	0.149834	21.2867	7	1.20479	-0.0393446	11000000	0.0107982	1	1	-3.38606	3091	通产丽星	12.14	D	7.31	1.65	0	0	3.18	1		master only (1)
2243	2016	8929194	1057000000	847100000	34221047	1810000000	284100000	1526000000	通产丽星	2008-05-28	广东省	深圳市	龙岗区			C29	橡胶和塑料制品业	0.0189079	0.15697	21.3165	8	1.24738	0.0349257	12000000	0.0113558	1	1	-3.42884	3032	通产丽星	14.69	D	10.78	1.51	0	0	2.4	1		master only (1)
2243	2017	9067761	1224000000	956600000	51706443	1911000000	351400000	1559000000	通产丽星	2008-05-28	广东省	深圳市	龙岗区			C29	橡胶和塑料制品业	0.0270624	0.183916	21.3707	9	1.27995	0.158752	11400000	0.009341	1	1	-3.4737	2833	通产丽星	16	D	11.86	1.69	0	0	2.45	1		master only (1)
2246	2010	10500	1344000000	1203000000	21912867	764900000	156900000	608000000	北化股份	2008-06-05	四川省	泸州市	泸州市			C26	化学原料及化学制品制造业	0.0286488	0.205138	20.4552	2	1.11665		2030872	0.0015116	3	0	-3.07778	424	北化股份	49.15	C	11.09	9.16	12	14	2.9	1		master only (1)
2246	2011	10500	1911000000	1733000000	32894049	729900000	143000000	586900000	北化股份	2008-06-05	四川省	泸州市	泸州市			C26	化学原料及化学制品制造业	0.0450666	0.195955	20.4084	3	1.10258	0.422237	4582865	0.0023983	3	0	-3.10992	58	北化股份	73.16	B	13.38	13.01	15	27.5	4.27	1	500000	matched (3)
2246	2012	2916.67	2071000000	1778000000	77178792	1605000000	677600000	927200000	北化股份	2008-06-05	四川省	泸州市	泸州市			C26	化学原料及化学制品制造业	0.0480912	0.422238	21.1963	4	1.16483	0.0838418	2214837	0.0010694	3	0	-3.25717	349	北化股份	62.12	B	8.93	12.69	11	23	6.5	1	0	matched (3)
2246	2013	3827129	2013000000	1735000000	64025311	1679000000	595200000	1084000000	北化股份	2008-06-05	四川省	泸州市	泸州市			C26	化学原料及化学制品制造业	0.0381398	0.354532	21.2413	5	1.15973	-0.0281941	42800000	0.0212712	3	0	-3.30168	443	北化股份	61.34	B	16.73	11.42	12	17	4.19	1		master only (1)
2246	2014	5163526	2036000000	1740000000	80531321	1654000000	491100000	1163000000	北化股份	2008-06-05	四川省	泸州市	泸州市			C26	化学原料及化学制品制造业	0.0486963	0.296964	21.2263	6	1.17022	0.0116118	37900000	0.018625	3	0	-3.3402	58	北化股份	64.42	B	14.6	11.41	12	23	3.41	1	280000	matched (3)
2246	2015	6365419	1505000000	1231000000	59785953	1591000000	392800000	1198000000	北化股份	2008-06-05	四川省	泸州市	泸州市			C26	化学原料及化学制品制造业	0.0375735	0.246862	21.1877	7	1.22234	-0.260881	15100000	0.010027	3	0	-3.37629	193	北化股份	59.6	C	13.48	12.05	12	20	2.07	1	0	matched (3)
2246	2016	6756584	2193000000	1601000000	147000000	2967000000	1039000000	1928000000	北化股份	2008-06-05	四川省	泸州市	泸州市			C26	化学原料及化学制品制造业	0.0495629	0.350099	21.8107	8	1.37041	0.457542	11400000	0.0051866	3	0	-3.46376	31	北化股份	75.68	B	13.43	15	15	30	2.25	1	75000	matched (3)
2246	2017	15000000	2183000000	1667000000	109200000	3481000000	986200000	2495000000	北化股份	2008-06-05	四川省	泸州市	泸州市			C26	化学原料及化学制品制造业	0.0313832	0.283309	21.9705	9	1.30949	-0.0045844	9367739	0.0042905	3	0	-3.51056	2544	北化股份	18.11	D	11.66	3.35	0	0	3.1	1		master only (1)
2250	2010	1000000	1973000000	1458000000	203000000	1705000000	822400000	883000000	联化科技	2008-06-19	浙江省	台州市	黄岩区			C26	化学原料及化学制品制造业	0.119026	0.482223	21.257	2	1.35322		4521800	0.0022913	1	1	-3.18322	1352	联化科技	20.4	D	16.97	0.08	0	0	3.35	0	0	matched (3)
2250	2011	1000000	2568000000	1872000000	297400000	2762000000	946600000	1816000000	联化科技	2008-06-19	浙江省	台州市	黄岩区			C26	化学原料及化学制品制造业	0.107653	0.34267	21.7393	3	1.37162	0.301298	11500000	0.0044915	1	1	-3.26002	355	联化科技	57.15	C	19.07	11.03	7	14	6.05	0		master only (1)
2250	2012	19700000	2955000000	2023000000	367500000	3849000000	1715000000	2134000000	联化科技	2008-06-19	浙江省	台州市	黄岩区			C26	化学原料及化学制品制造业	0.0954652	0.445568	22.0711	4	1.46072	0.150822	8215530	0.0027799	1	1	-3.31372	116	联化科技	71.22	B	21.74	8.53	15	20	5.95	0		master only (1)
2250	2013	20000000	3368000000	2262000000	453800000	4603000000	1897000000	2706000000	联化科技	2008-06-19	浙江省	台州市	黄岩区			C26	化学原料及化学制品制造业	0.0985946	0.412126	22.2499	5	1.48938	0.139742	6734332	0.0019993	1	1	-3.35717	346	联化科技	65.31	B	22.27	9.04	12	17	5	0		master only (1)
2250	2014	18100000	3990000000	2648000000	558800000	5797000000	2310000000	3487000000	联化科技	2008-06-19	浙江省	台州市	黄岩区			C26	化学原料及化学制品制造业	0.0963936	0.398435	22.4806	6	1.50682	0.184635	10500000	0.0026433	1	1	-3.39757	1184	联化科技	23.07	D	20.29	0.13	0	0	2.65	0	30000	matched (3)
2250	2015	23800000	4008000000	2515000000	644600000	6345000000	2164000000	4182000000	联化科技	2008-06-19	浙江省	台州市	黄岩区			C26	化学原料及化学制品制造业	0.101585	0.340985	22.571	7	1.59345	0.0043909	12900000	0.0032134	1	1	-3.43648	1005	联化科技	25.03	D	20.58	2.16	0	0	2.29	0	201000	matched (3)
2250	2016	25800000	3099000000	2065000000	269200000	6001000000	1607000000	4394000000	联化科技	2008-06-19	浙江省	台州市	黄岩区			C26	化学原料及化学制品制造业	0.0448548	0.267792	22.5152	8	1.50118	-0.226678	87500000	0.0282459	1	1	-3.47723	233	联化科技	63.99	B	16.15	13.5	15	17	2.34	0	584500	matched (3)
2250	2017	34500000	4107000000	2822000000	207500000	8653000000	3015000000	5638000000	联化科技	2008-06-19	浙江省	台州市	黄岩区			C26	化学原料及化学制品制造业	0.0239826	0.348399	22.8811	9	1.4553	0.325259	22100000	0.0053874	1	1	-3.50739	2053	联化科技	20.7	D	14.71	2.5	0	0	3.49	0	38920	matched (3)
2254	2010	6410.26	1491000000	1018000000	273000000	2268000000	390000000	1878000000	泰和新材	2008-06-25	山东省	烟台市	福山区			C28	化学纤维制造业	0.120357	0.171961	21.5422	2	1.46487		1359540	0.0009121	1	1	-3.2074	764	泰和新材	24.94	D	18.33	3.68	0	0	2.93	1		master only (1)
2254	2011	73974.4	1540000000	1235000000	142700000	2306000000	505700000	1800000000	泰和新材	2008-06-25	山东省	烟台市	福山区			C28	化学纤维制造业	0.0618945	0.219303	21.5588	3	1.24766	0.033381	3226900	0.002095	1	1	-3.24858	1181	泰和新材	23.6	D	19.05	1.82	0	0	2.73	1		master only (1)
2254	2012	73974.4	1531000000	1342000000	44982262	2194000000	460900000	1734000000	泰和新材	2008-06-25	山东省	烟台市	福山区			C28	化学纤维制造业	0.020498	0.210015	21.5092	4	1.14043	-0.0061639	13100000	0.0085869	1	1	-3.28496	2433	泰和新材	14.24	D	10.66	1.32	0	0	2.26	1		master only (1)
2254	2013	73974.4	1770000000	1476000000	94326644	2294000000	428600000	1865000000	泰和新材	2008-06-25	山东省	烟台市	福山区			C28	化学纤维制造业	0.0411243	0.186853	21.5534	5	1.19895	0.156297	11300000	0.006364	1	1	-3.32821	2544	泰和新材	15.76	D	10.2	3.19	0	0	2.37	1		master only (1)
2254	2014	273974	1776000000	1398000000	167800000	2597000000	559200000	2038000000	泰和新材	2008-06-25	山东省	烟台市	福山区			C28	化学纤维制造业	0.0646163	0.215306	21.6776	6	1.27039	0.0033855	5590725	0.0031479	1	1	-3.37643	1574	泰和新材	21.2	D	14.4	3.88	0	0	2.92	1		master only (1)
2254	2015	273974	1598000000	1293000000	109100000	2558000000	450600000	2107000000	泰和新材	2008-06-25	山东省	烟台市	福山区			C28	化学纤维制造业	0.0426609	0.176163	21.6624	7	1.23656	-0.0999771	12400000	0.0077574	1	1	-3.41549	2434	泰和新材	17.87	D	10.73	3.78	0	0	3.36	1		master only (1)
2254	2016	594144	1581000000	1341000000	63869632	2599000000	438700000	2160000000	泰和新材	2008-06-25	山东省	烟台市	福山区			C28	化学纤维制造业	0.0245784	0.168818	21.6782	8	1.17875	-0.0110572	5842742	0.0036961	1	1	-3.45646	2350	泰和新材	19.35	D	13.58	3.22	0	0	2.55	1		master only (1)
2254	2017	1971636	1555000000	1301000000	106700000	2619000000	429900000	2189000000	泰和新材	2008-06-25	山东省	烟台市	福山区			C28	化学纤维制造业	0.0407589	0.164134	21.6861	9	1.195	-0.0163875	35800000	0.0230394	1	1	-3.49694	2407	泰和新材	19	D	13.56	2.98	0	0	2.46	1		master only (1)
2256	2010	21100000	396700000	297200000	21733697	648900000	112300000	536600000	兆新股份	2008-06-25	广东省	深圳市	宝安区			C26	化学原料及化学制品制造业	0.0334953	0.173054	20.2907	2	1.33449		0	0	1	1	-3.04931	2106	彩虹精化	13.95	D	12.16	0.98	0	0	0.81	0		master only (1)
2256	2011	21300000	419400000	331200000	10056708	685000000	121000000	564000000	兆新股份	2008-06-25	广东省	深圳市	宝安区			C26	化学原料及化学制品制造业	0.0146818	0.176661	20.3449	3	1.26641	0.057391	990000	0.0023603	1	1	-3.09894	2546	彩虹精化	3.09	D	2.96	0.88	0	0	-0.75	0		master only (1)
2256	2012	28400000	476800000	383700000	-9.12757e+06	792800000	228800000	564100000	兆新股份	2008-06-25	广东省	深圳市	宝安区			C26	化学原料及化学制品制造业	-0.0115128	0.288534	20.4911	4	1.24257	0.136702	903000	0.001894	1	1	-3.16368	2699	彩虹精化	4.59	D	0.66	1.27	0	0	2.66	0		master only (1)
2256	2013	28000000	589300000	455200000	59767815	646600000	130800000	515800000	兆新股份	2008-06-25	广东省	深圳市	宝安区			C26	化学原料及化学制品制造业	0.0924323	0.202361	20.2873	5	1.29451	0.235974	364387	0.0006184	1	1	-3.16869	2148	彩虹精化	18.57	D	16.34	1.41	0	0	0.82	0		master only (1)
2256	2014	28200000	528000000	363800000	45635231	1226000000	664300000	561700000	兆新股份	2008-06-25	广东省	深圳市	宝安区			C26	化学原料及化学制品制造业	0.0372208	0.541829	20.9271	6	1.45128	-0.103936	163306	0.0003093	1	1	-3.30653	3140	彩虹精化	10.72	D	6.59	1.47	0	0	2.66	0		master only (1)
2256	2015	28200000	506300000	321900000	51915067	1862000000	1262000000	600400000	兆新股份	2008-06-25	广东省	深圳市	宝安区			C26	化学原料及化学制品制造业	0.027874	0.677621	21.3452	7	1.57265	-0.0412352	4293003	0.0084799	1	1	-3.39144	3003	彩虹精化	13.47	D	10.73	1.4	0	0	1.34	0		master only (1)
2256	2016	20800000	636100000	411400000	117000000	3349000000	1108000000	2241000000	兆新股份	2008-06-25	广东省	深圳市	宝安区			C26	化学原料及化学制品制造业	0.0349216	0.330931	21.9321	8	1.54616	0.256481	11800000	0.0186209	1	1	-3.46913	2284	彩虹精化	19.67	D	16.52	1.69	0	0	1.46	0	83200	matched (3)
2256	2017	33000000	654100000	420000000	152800000	3859000000	1540000000	2319000000	兆新股份	2008-06-25	广东省	深圳市	宝安区			C26	化学原料及化学制品制造业	0.0395982	0.399031	22.0736	9	1.55738	0.0283271	45500000	0.0694942	1	1	-3.51378	2078	彩虹精化	20.55	D	18.82	1.53	0	0	0.2	0	0	matched (3)
2258	2010	955000	445300000	314300000	71738076	915600000	72183362	843500000	利尔化学	2008-07-08	四川省	绵阳市	绵阳市			C26	化学原料及化学制品制造业	0.0783468	0.0788331	20.6351	2	1.41686		6361700	0.0142859	3	0	-3.10625	1875	利尔化学	16.95	D	15.3	0.73	0	0	0.92	1	130000	matched (3)
2258	2011	1365504	936000000	731400000	89260534	1284000000	149400000	1135000000	利尔化学	2008-07-08	四川省	绵阳市	绵阳市			C26	化学原料及化学制品制造业	0.0695102	0.116352	20.9733	3	1.27967	1.10191	3412200	0.0036455	3	0	-3.19224	2207	利尔化学	15.29	D	11.78	1.67	0	0	1.84	1	130000	matched (3)
2258	2012	1424334	1278000000	986400000	119100000	1492000000	243600000	1248000000	利尔化学	2008-07-08	四川省	绵阳市	绵阳市			C26	化学原料及化学制品制造业	0.0798095	0.163241	21.1234	4	1.29569	0.365471	23100000	0.0181026	3	0	-3.24949	1661	利尔化学	21.12	D	16.62	2.1	0	0	2.4	1		master only (1)
2258	2013	2024334	1440000000	1120000000	114800000	1800000000	468300000	1332000000	利尔化学	2008-07-08	四川省	绵阳市	绵阳市			C26	化学原料及化学制品制造业	0.0637892	0.260125	21.3111	5	1.28649	0.12701	12400000	0.0086013	3	0	-3.30834	1655	利尔化学	21.27	D	16.19	2.5	0	0	2.58	1		master only (1)
2258	2014	1679423	1317000000	1028000000	95193823	2042000000	637200000	1405000000	利尔化学	2008-07-08	四川省	绵阳市	绵阳市			C26	化学原料及化学制品制造业	0.0466149	0.312042	21.4373	6	1.28211	-0.0854148	19100000	0.0144926	3	0	-3.35931	2443	利尔化学	17.31	D	11.83	2.6	0	0	2.88	1	1610000	matched (3)
2258	2015	1945833	1489000000	1130000000	144800000	2557000000	1005000000	1551000000	利尔化学	2008-07-08	四川省	绵阳市	绵阳市			C26	化学原料及化学制品制造业	0.0566176	0.393174	21.662	7	1.31798	0.13032	16600000	0.0111435	3	0	-3.41546	1213	利尔化学	23.77	D	18.19	3.01	0	0	2.57	1	1450000	matched (3)
2258	2016	2487799	1982000000	1502000000	223500000	3116000000	820400000	2296000000	利尔化学	2008-07-08	四川省	绵阳市	绵阳市			C26	化学原料及化学制品制造业	0.0717224	0.263237	21.86	8	1.31969	0.331234	15000000	0.0075916	3	0	-3.46609	2597	利尔化学	18.07	D	13	2.68	0	0	2.39	1	390000	matched (3)
2258	2017	11800000	3084000000	2197000000	438700000	4515000000	1728000000	2787000000	利尔化学	2008-07-08	四川省	绵阳市	绵阳市			C26	化学原料及化学制品制造业	0.0971646	0.38275	22.2306	9	1.40329	0.555538	21300000	0.0069191	3	0	-3.51693	1822	利尔化学	21.87	D	15.56	3.68	0	0	2.63	1	390000	matched (3)
2263	2010	24000	1407000000	1180000000	109800000	2632000000	936400000	1695000000	*ST东南	2008-07-28	浙江省	绍兴市	诸暨市			C29	橡胶和塑料制品业	0.0417133	0.355794	21.6909	2	1.19295		2253151	0.0016012	1	1	-3.21723	2095	*ST东南	14.11	D	11.39	0.42	0	0	2.3	0	60000	matched (3)
2263	2011	24000	1230000000	1099000000	94019921	3357000000	378800000	2978000000	*ST东南	2008-07-28	浙江省	绍兴市	诸暨市			C29	橡胶和塑料制品业	0.0280045	0.112836	21.9344	3	1.11927	-0.126006	189000000	0.153549	1	1	-3.26922	1985	*ST东南	17.73	D	14.94	0.04	0	0	2.75	0		master only (1)
2263	2012	24000	808700000	832600000	-82089347	3439000000	664700000	2774000000	*ST东南	2008-07-28	浙江省	绍兴市	诸暨市			C29	橡胶和塑料制品业	-0.0238694	0.193284	21.9585	4	0.971248	-0.34244	32800000	0.0405292	1	1	-3.31013	2729	*ST东南	3.01	D	4.82	0.03	0	0	-1.84	0		master only (1)
2263	2013	24000	744100000	750300000	8.14726e+06	3545000000	824900000	2720000000	*ST东南	2008-07-28	浙江省	绍兴市	诸暨市			C29	橡胶和塑料制品业	0.0022985	0.232716	21.9887	5	0.991674	-0.0798765	86000000	0.115615	1	1	-3.3512	2914	*ST东南	8.62	D	5.17	0.19	0	0	3.26	0		master only (1)
2263	2014	24000	917900000	922900000	-8.57837e+06	3495000000	897800000	2597000000	*ST东南	2008-07-28	浙江省	绍兴市	诸暨市			C29	橡胶和塑料制品业	-0.0024547	0.256914	21.9745	6	0.994545	0.233524	46100000	0.0502401	1	1	-3.3907	3168	*ST东南	9.84	D	4.84	0	0	0	5	0		master only (1)
2263	2015	390154	898100000	856200000	-3.47206e+06	4214000000	1203000000	3011000000	*ST东南	2008-07-28	浙江省	绍兴市	诸暨市			C29	橡胶和塑料制品业	-0.0008239	0.285456	22.1618	7	1.04897	-0.021485	18000000	0.0200519	1	1	-3.43581	3417	*ST东南	1.06	D	0.59	0.68	0	0	-0.21	0		master only (1)
2263	2016	6113923	950700000	848400000	-192300000	3971000000	1180000000	2791000000	*ST东南	2008-07-28	浙江省	绍兴市	诸暨市			C29	橡胶和塑料制品业	-0.0484369	0.297207	22.1023	8	1.12059	0.0584744	8719482	0.009172	1	1	-3.47452	3575	*ST东南	-6.52	E	-6.81	0.93	0	0	-0.64	0		master only (1)
2263	2017	6113923	1049000000	978400000	-575200000	3314000000	1098000000	2216000000	*ST东南	2008-07-28	浙江省	绍兴市	诸暨市			C29	橡胶和塑料制品业	-0.173564	0.331369	21.9214	9	1.07172	0.102928	7572756	0.0072224	1	1	-3.5087	3496	*ST东南	-0.83	E	-1.39	0.59	0	0	-0.03	0		master only (1)
2271	2010	748401	1982000000	1411000000	107100000	2198000000	1165000000	1033000000	东方雨虹	2008-09-10	北京市	北京市	顺义区			C30	非金属矿物制品业	0.0487483	0.530134	21.5106	2	1.40419		6236427	0.0031471	1	1	-3.20506	1927	东方雨虹	16.38	D	13.87	0.42	0	0	2.09	0		master only (1)
2271	2011	2158198	2474000000	1791000000	104200000	2326000000	1228000000	1098000000	东方雨虹	2008-09-10	北京市	北京市	顺义区			C30	非金属矿物制品业	0.0447734	0.527845	21.5676	3	1.3808	0.248273	33400000	0.0135058	1	1	-3.24921	2067	东方雨虹	17.05	D	14.7	0.34	0	0	2.01	0		master only (1)
2271	2012	19400000	2979000000	2102000000	191300000	2811000000	1554000000	1257000000	东方雨虹	2008-09-10	北京市	北京市	顺义区			C30	非金属矿物制品业	0.0680441	0.552762	21.7569	4	1.41724	0.204118	33300000	0.0111941	1	1	-3.30098	346	东方雨虹	62.29	B	21.69	9.1	12	17	2.5	0		master only (1)
2271	2013	28500000	3903000000	2584000000	370200000	3520000000	1819000000	1701000000	东方雨虹	2008-09-10	北京市	北京市	顺义区			C30	非金属矿物制品业	0.105161	0.516871	21.9817	5	1.51053	0.310235	29600000	0.0075859	1	1	-3.35096	150	东方雨虹	72.21	B	22.78	11.48	15	20	2.95	0	479900	matched (3)
2271	2014	5999947	5006000000	3222000000	582600000	5141000000	1679000000	3462000000	东方雨虹	2008-09-10	北京市	北京市	顺义区			C30	非金属矿物制品业	0.113314	0.326587	22.3606	6	1.55371	0.282706	27400000	0.0054733	1	1	-3.39793	1268	东方雨虹	22.68	D	19.74	1.06	0	0	1.88	0	900000	matched (3)
2271	2015	8790341	5304000000	3142000000	728800000	6084000000	2016000000	4068000000	东方雨虹	2008-09-10	北京市	北京市	顺义区			C30	非金属矿物制品业	0.119791	0.331297	22.5289	7	1.68811	0.0595428	114000000	0.0215401	1	1	-3.43707	1109	东方雨虹	24.39	D	20.96	1.04	0	0	2.39	0	130100	matched (3)
[truncated: 3,097 more rows]
